# Supplementary material for: The Response of Lactococcus lactis to Membrane Protein Production
Source: PLoS One. 2011 Aug 31;6(8):e24060. doi: 10.1371/journal.pone.0024060 (PMC3164122; doi:10.1371/journal.pone.0024060)
Supplement: Table S2 — Transcriptome/Proteome analysis of L. lactis NZ9000 overproducing water-soluble substrate receptor OpuAC. Spreadsheet with the transcriptomics and soluble proteome data (raw/filtered) for the cells overexpressing OpuAC. (XLS) [file pone.0024060.s005.xls]

## Sheet: General information
General information about the sheets
Information for all sheets
	T = transcriptome data (including time dependent data for OpuA(H223A))
	SP = soluble proteome data (is at 64 min.)
	The 2500 ORF amplicons of L. lactis subsp. cremoris MG1363 as indicated in Kuipers et al 2002 (See below)
	The prediction of the number of transmembrane helices (# TMDs) is based on TMHMM predictions
	The meaning of the abbreviations of COG/KEGG anatotations are explained in sheet 9
Information per sheet
Number	General description	Detailed information
1	The significant up and down regulated genes/proteins from the transcriptome and soluble proteome	shown ratio's are the ratios of sample over its control; cutoffs are defined in the Material and Methods per used technique.
2	peptide report for the proteins identified from 2D gel plugs for OpuAc vs 8048	For each 2D gel protein spot, the number of peptides that were identified were listed as well as the significance of spots (t-test values) and ratio of abundance as detailed in materials and methods were listed.
3	Crude data of all genes identified in the transcriptome data OpuAC	Natural logaritmic ratios of the different measurements are given (ratio_1 to 6), the number of time differences were observed (# obs), the mean ln-ratio and the (mean) log2-ratio and the p-value are given
4	Meaning of the abbreviations used for the COG/KEGG annotations	References for the COG and KEGG database are listed in M&M
References
1	Kuipers, O. P., de Jong, A., Baerends, R. J., van Hijum, S. A., Zomer, A. L., Karsens, H. A., den Hengst, C. D., Kramer, N. E., Buist, G., and Kok, J. (2002) Antonie Van Leeuwenhoek 82, 113-122

## Sheet: 1.All significant data (cutoff)
Accession nr.	Description	name	# TMDs	COG annotation	KEGG level2	T-OpuAC*	SP-OpuAC*
ampMG150030
ampMG150031
ampMG150032
ampMG150051
ampMG150055
ampMG150058
ampMG150072
ampMG150092
ampMG150096
ampMG150099
ampMG150102
ampMG150119
ampMG150239
ampMG150259
ampMG150284
ampMG150321
ampMG150323
ampMG150380
ampMG150380B
ampMG2722
llmg_0001	chromosomal replication initiation proten	dnaA	0	L	R
llmg_0002	DNA polymerase subunt beta	dnaN	0	L	R,N
llmg_0003	ATP-dependent nuclease subunt B	rexB	0	L	-
llmg_0004	ATP-dependent nuclease subunit A	rexA	0	L	-	1.7
llmg_0005	hypothetical protein	llmg_0005	0	S	-	1.58394
llmg_0006	Putative HTH-type transcriptional regulator	llmg_0006	3	K	-
llmg_0007	translation-associated GTPase	llmg_0007	0	J	-
llmg_0008	Putative HTH-type transcriptional regulator	llmg_0008	1	K	-
llmg_0009	putative secreted protein	llmg_0009	0	V	-
llmg_0010	hypothetical protein	llmg_0010	0	0	-
llmg_0011	hypothetical protein	llmg_0011	0	F	-
llmg_0012	peptidyl-tRNA hydrolase	pth	0	J	U
llmg_0013	Transcription-repair coupling factor (TRCF)	mfd	0	LK	R
llmg_0015	putative RNA binding protein	llmg_0015	0	J	-
llmg_0016	hypothetical protein	llmg_0016	1	D	-
llmg_0017	putative RNA binding protein	llmg_0017	0	J	-
llmg_0018	similar to Beta-lactamase A	llmg_0018	1	V	S,B
llmg_0019	cell cycle protein mesJ	mesJ	0	D	D
llmg_0020	hypoxanthine phosphoribosyltransferase	hpt	0	F	N,X
llmg_0021	putative cell division protein	ftsH	2	O	D,F
llmg_0021	putative cell division protein	ftsH	2	O	D,F
llmg_0022	PTS system, mannitol-specific IIBC component	mtlA	10	G	M,C
llmg_0022	PTS system, mannitol-specific IIBC component	mtlA	10	G	M,C
llmg_0023	transcriptional regulator mtl operon mtlR	mtlR	0	K	T
llmg_0024	PTS system, mannitol-specific IIA component	mtlF	0	G	M,C
llmg_0025	mannitol-1-phosphate 5-dehydrogenase	mtlD	0	G	C
llmg_0028	hypothetical protein	ps128	0	0	-
llmg_0029	hypothetical protein	ps127	0	0	-
llmg_0030	Putative DNA primase	ps126	0	R	-
llmg_0032	hypothetical protein	ps124	0	0	-
llmg_0033	hypothetical protein	ps123	0	0	-
llmg_0034	hypothetical protein	ps122	0	0	-
llmg_0034	hypothetical protein	ps122	0	0	-
llmg_0034	hypothetical protein	ps122	0	0	-
llmg_0034	hypothetical protein	ps122	0	0	-
llmg_0035	Putative DNA binding protein	ps121	0	0	-
llmg_0036	hypothetical protein	ps120	0	0	-
llmg_0037	hypothetical protein	ps119	0	0	-
llmg_0038	hypothetical protein	ps118	0	K	-
llmg_0039	hypothetical protein	ps117	0	0	-
llmg_0039	hypothetical protein	ps117	0	0	-
llmg_0040	phage repressor	ps116	0	0	-
llmg_0041	phage repressor	ps115	0	K	-
llmg_0042	hypothetical protein	ps114	0	0	-
llmg_0043	hypothetical protein	ps113	2	0	-
llmg_0044	hypothetical protein	ps112	0	0	-
llmg_0045	hypothetical protein	ps111	2	0	-
llmg_0046	hypothetical protein	ps110	0	0	-
llmg_0047	hypothetical protein	ps109	2	0	-	1.58394
llmg_0048	Ps108 protein	ps108	0	0	-
llmg_0051	hypothetical protein, phage asociated	ps105	1	0	-
llmg_0052	hypothetical protein	ps104	0	0	-
llmg_0053	hypothetical protein phage associated	ps103	0	0	-
llmg_0055	phage integrase	ps101	0	L	-
llmg_0055	phage integrase	ps101	0	L	-
llmg_0056	hypothetical protein	llmg_0056	0	R	-
llmg_0057	hypothetical protein	llmg_0057	0	0	-
llmg_0059	putative secreted protein	llmg_0059	0	0	-
llmg_0060	hypothetical protein	llmg_0060	0	0	-
llmg_0061	putative acetyltransferase	llmg_0061	0	KR	-
llmg_0062	hypothetical protein	llmg_0062	1	S	-
llmg_0063	putative sulphate transporter	llmg_0063	10	P	M
llmg_0063	putative sulphate transporter	llmg_0063	10	P	M
llmg_0065	putative acetyltransferase, GNAT family	llmg_0065	0	R	A,B,L,X
llmg_0066	aromatic amino acid aminotransferase	araT	0	E	A
llmg_0067	DNA repair protein RecO	recO	0	L	R
llmg_0069	HTH-type transcriptional regulator Rgg family	llmg_0069	0	K	-
llmg_0070	putative permease	llmg_0070	10	GEPR	-
llmg_0071	dihydrolipoamide dehydrogenase	pdhD	0	C	A,C	-1.50784
llmg_0071	dihydrolipoamide dehydrogenase	pdhD	0	C	A,C	-1.73879
llmg_0072	pyruvate dehydrogenase complex E2 component	pdhC	0	C	C
llmg_0073	pyruvate dehydrogenase E1 component beta subunit	pdhB	0	C	A,C
llmg_0074	pyruvate dehydrogenase E1 component alpha subunit	pdhA	0	C	A,C
llmg_0075	lipoate-protein ligase	lplL	0	H	V
llmg_0076	glycerophosphodiester phosphodiesterase	llmg_0076	0	C	L
llmg_0077	putative phosphohydrolase	llmg_0077	0	R	-
llmg_0078	hypothetical protein	llmg_0078	3	0	-
llmg_0079	tryptophanyl-tRNA synthetase II	trpS	0	J	U,A		-1.5169
llmg_0080	osmotically inducible protein C	osmC	0	O	F
llmg_0081	putative amino-acid permease	llmg_0081	10	E	-
llmg_0083	fatty acid/phospholipid synthesis protein	plsX	0	I	-
llmg_0084	putative hydrolase	llmg_0084	0	R	-
llmg_0085	Putative ABC transporter ATP binding protein	llmg_0085	0	R	-
llmg_0085	Putative ABC transporter ATP binding protein	llmg_0085	0	R	-
llmg_0086	hypothetical protein	llmg_0086	2	S	-
llmg_0087	putative short-chain type dehydrogenase	llmg_0087	0	IQR	-
llmg_0089	Putative HTH-type transcriptional regulator	llmg_0089	0	K	-
llmg_0090	hypothetical protein	llmg_0090	4	0	-
llmg_0091	O-acetylhomoserine sulfhydrylase	cysD	0	E	A
llmg_0092	putative short-chain type dehydrogenase	llmg_0092	0	IQR	-
llmg_0093	hypothetical protein	llmg_0093	0	T	-	-1.52842
llmg_0094	hypothetical protein	llmg_0094	0	0	-
llmg_0095	putative esterase	llmg_0095	0	R	-
llmg_0096	putatve glyoxylase protein	llmg_0096	0	E	L,X
llmg_0097	putative flavoprotein oxygenase	llmg_0097	0	R	-
llmg_0098	50S ribosomal protein L33	rpmG	0	J	U	-2.24139
llmg_0099	50S ribosomal protein L32	rpmF	0	J	U	-1.59817
llmg_0100	cation-transporting ATPase	cadA	6	P	-
llmg_0100	cation-transporting ATPase	cadA	6	P	-
llmg_0101	hypothetical protein	llmg_0101	7	S	-
llmg_0102	chromosome partitioning protein parA	parA	0	K	T
llmg_0103	recombination factor protein RarA	cshA	0	L	R
llmg_0103	recombination factor protein RarA	cshA	0	L	R
llmg_0104	acetyltransferase, GNAT family	llmg_0104	0	KR	A,B,L,X
llmg_0105	hypothetical protein	llmg_0105	0	0	-
llmg_0106	similar to ABC transporter (ATP-binding protein)	llmg_0106	0	R	-
llmg_0106	similar to ABC transporter (ATP-binding protein)	llmg_0106	0	R	-
llmg_0107	hypothetical protein	llmg_0107	0	0	-
llmg_0108	S-adenosylmethionine-dependent methyltransferase	llmg_0108	0	QR	-
llmg_0109	hypothetical protein	llmg_0109	0	0	-
llmg_0110	ribosomal protein L11 methyltransferase	prmA	0	J	U
llmg_0111	hypothetical protein	llmg_0111	0	S	U
llmg_0112	putative xylanase/chitin deacetylase	llmg_0112	1	G	-
llmg_0113	GTP pyrophosphokinase	relA	0	TK	N
llmg_0113	GTP pyrophosphokinase	relA	0	TK	N
llmg_0114	glycosyl transferase, family 2	llmg_0114	2	M	C
llmg_0114	glycosyl transferase, family 2	llmg_0114	2	M	C
llmg_0115	D-tyrosyl-tRNA deacylase	dtd	0	J	U
llmg_0116	hypothetical protein	llmg_0116	5	S	-
llmg_0117	hypothetical protein	llmg_0117	0	R	-
llmg_0118	putative amino-acid transporter	ctrA	12	E	M	3.27113
llmg_0119	putative Acyltransferase	llmg_0119	1	I	L
llmg_0120	transcriptional regulator, MarR family	rmaD	0	K	-
llmg_0123	AcpD protein	acpD	0	I	-
llmg_0124	preprotein translocase subunit SecA	secA	0	U	F
llmg_0125	phospho-2-dehydro-3-heoxyheptonate aldolase	aroF	0	E	A
llmg_0126	Phosphocarrier protein HPr	ptsH	0	G	M
llmg_0127	phosphoenolpyruvate-protein phosphotransferase	ptsI	0	G	M
llmg_0128	hypothetical protein	llmg_0128	0	S	-
llmg_0129	hypothetical protein	llmg_0129	0	0	-
llmg_0130	hypothetical protein	llmg_0130	1	R	-
llmg_0131	hypothetical protein	llmg_0131	0	0	-
llmg_0131	hypothetical protein	llmg_0131	0	0	-
llmg_0132	Small Multidrug Resistance protein	sugE	4	P	M
llmg_0132	Small Multidrug Resistance protein	sugE	4	P	M
llmg_0133	multidrug resistance protein	blt	12	GEPR	M
llmg_0134	bactoprenol glucosyl transferase	llmg_0134	2	M	C
llmg_0135	hypothetical protein	llmg_0135	10	0	-
llmg_0135	hypothetical protein	llmg_0135	10	0	-
llmg_0136	putative sensor protein kinase	llmg_0136	0	T	-
llmg_0136	putative sensor protein kinase	llmg_0136	0	T	-
llmg_0137	Permeases	llmg_0137	10	0	-
llmg_0137	Permeases	llmg_0137	10	0	-
llmg_0138	ArgG protein	argG	0	E	A
llmg_0139	ArgH protein	argH	0	E	A
llmg_0140	multidrug resistance efflux pump	pmrB	9	GEPR	M
llmg_0141	Putative Transcriptional regulator	llmg_0141	0	K	-
llmg_0142	ribonuclease P	rnpA	0	J	U
llmg_0143	preprotein translocase subunit	llmg_0143	3	U	F
llmg_0144	hypothetical protein	llmg_0144	0	R	D
llmg_0145	50S ribosomal protein L34	rpmH	0	J	U
llmg_0146	aryl-alcohol dehydrogenase	llmg_0146	0	R	-
llmg_0147	lambda repressor-like, DNA-binding	llmg_0147	0	K	-
llmg_0148	hypothetical protein	llmg_0148	0	0	-
llmg_0149	hypothetical protein	llmg_0149	5	R	-
llmg_0150	hypothetical protein	llmg_0150	0	S	-
llmg_0151	putative Hollyday junction resolvase	llmg_0151	0	L	R
llmg_0152	hypothetical protein	llmg_0152	0	S	-
llmg_0153	hypothetical protein	llmg_0153	5	S	-
llmg_0154	carbonyl reductase cbr	cbr	0	IQR	L
llmg_0155	hypothetical protein	llmg_0155	0	S	-
llmg_0156	oxidoreductase dltE	dltE	0	M	-
llmg_0157	similar to transcriptional regulator	tetR	0	K	-
llmg_0158	GlgB protein	glgB	0	G	C
llmg_0158	GlgB protein	glgB	0	G	C
llmg_0159	hypothetical protein	llmg_0159	0	0	-
llmg_0160	Oxygen-insensitive NAD(P)H nitroreductase	llmg_0160	0	C	-
llmg_0161	Putative HTH-type transcriptional regulator	llmg_0161	0	K	-
llmg_0162	hypothetical protein	llmg_0162	1	M	-
llmg_0163	transcriptional regulator	epsR	0	K	-
llmg_0164	queuine tRNA-ribosyltransferase	tgt	0	J	U
llmg_0165	hypothetical protein	llmg_0165	4	S	-
llmg_0165	hypothetical protein	llmg_0165	4	S	-
llmg_0167	hypothetical protein	llmg_0167	0	R	-
llmg_0168	deoxyribonuclease	llmg_0168	1	0	R
llmg_0169	hypothetical protein	llmg_0169	3	0	-
llmg_0170	hypothetical protein	llmg_0170	8	0	-
llmg_0171	aminotransferase AlaT	aspC	0	E	-	2.01498
llmg_0172	transcriptional repressor CodY	codY	0	K	T
llmg_0173	hypothetical protein	llmg_0173	0	0	-
llmg_0174	aspartyl/glutamyl-tRNA amidotransferase subunit C	gatC	0	J	U,A
llmg_0175	amidase	gatA	0	J	U,A
llmg_0175	amidase	gatA	0	J	U,A
llmg_0176	aspartyl/glutamyl-tRNA amidotransferase subunit B	gatB	0	J	U,A
llmg_0177	amidase	llmg_0177	0	J	A,X
llmg_0178	Damage-inducible protein DinF	dinF	11	V	-
llmg_0180	cold shock-like protein cspE	cspE	0	K	T
llmg_0181	5-formyltetrahydrofolate cyclo-ligase family protein	llmg_0181	0	H	V
llmg_0182	Rhomboid-related protein 1	llmg_0182	6	R	-
llmg_0183	hypothetical protein	llmg_0183	0	0	-
llmg_0184	putative Lactoylglutathione lyase	llmg_0184	0	E	C
llmg_0185	acetyltransferase, GNAT family	llmg_0185	0	R	A,B,L,X
llmg_0186	hypothetical protein	llmg_0186	0	S	-
llmg_0187	Cellobiose-specific PTS system IIC component	celB	8	G	M
llmg_0188	hypothetical protein	llmg_0188	0	0	-
llmg_0190	Beta-glucosidase A	bglS	0	G	A,C
llmg_0191	deoxyuridine 5'-triphosphate nucleotidohydrolase	dut	0	F	N
llmg_0192	5'-nucleotidase precursor	llmg_0192	0	F	V,N
llmg_0193	hypothetical protein	llmg_0193	0	S	-
llmg_0194	hypothetical protein	llmg_0194	0	R	U
llmg_0195	putative NADH dehydrogenase	llmg_0195	0	C	-
llmg_0196	prenyl transferase	llmg_0196	0	H	L		-1.7138
llmg_0197	1,4-dihydroxy-2-naphthoate octaprenyltransferase	menA	7	H	V
llmg_0198	hypothetical protein	llmg_0198	11	R	-
llmg_0199	ferrous iron transport protein B homolog	feoB	12	P	M
llmg_0199	ferrous iron transport protein B homolog	feoB	12	P	M
llmg_0200	ferrous iron transport protein A	feoA	0	P	M	-2.47444
llmg_0201	methionine sulfoxide reductase B	msrB	0	O	F
llmg_0202	predicted kinase related to dihydroxyacetone kinase	llmg_0202	0	R	-
llmg_0203	hypothetical protein	llmg_0203	0	S	-
llmg_0204	50S ribosomal protein L28	rpmB	0	J	U	-1.71258
llmg_0205	hypothetical protein	llmg_0205	4	S	-
llmg_0206	glucose-1-phosphate thymidylyltransferase	rmlA	0	M	P,B,C
llmg_0207	dTDP-4-keto-6-deoxyglucose-3,5-epimerase	rmlC	0	M	P,B,C
llmg_0208	hypothetical protein	llmg_0208	0	0	-
llmg_0209	dTDP-glucose 4,6-dehydratase	rmlB	0	M	P,B,C
llmg_0210	dTDP-4-dehydrorhamnose reductase	rmlD	0	M	P,B,C		-1.6554
llmg_0211	Rhamnosyltransferase RgpA	rgpA	0	M	C
llmg_0212	Rhamnosyltransferase RgpB	rgpB	0	M	C
llmg_0213	capsule polysaccharide export inner-membrane protein RgpC	rgpC	6	GM	M
llmg_0214	Polysaccharide ABC transporter ATP-binding protein RgpD	rgpD	0	GM	M	1.67802
llmg_0214	Polysaccharide ABC transporter ATP-binding protein RgpD	rgpD	0	GM	M
llmg_0215	hypothetical protein	llmg_0215	9	S	-
llmg_0216	Glycosyltransferase RgpE	rgpE	0	M	-	1.78219
llmg_0217	alpha-L-Rha alpha-1,2-L-rhamnosyltransferase RgpF	rgpF	0	M	-
llmg_0218	putative glycosyl transferase	llmg_0218	0	M	-
llmg_0219	hypothetical protein	llmg_0219	3	0	-	1.69613
llmg_0220	putative glycosyl transferase	llmg_0220	0	M	-
llmg_0221	similar to glycosyl transferase	llmg_0221	0	M	C
llmg_0222	hypothetical protein	wefC	0	0	-	1.63558
llmg_0223	hypothetical protein	llmg_0223	0	M	-
llmg_0224	Glf1 protein	glf1	0	M	-	1.55908
llmg_0225	Putative O-antigen transporter	rfbX	13	R	-
llmg_0226	possible surface protein	llmg_0226	2	M	-	1.61914
llmg_0227	hypothetical protein	llmg_0227	7	S	-	1.70493
llmg_0228	hypothetical protein	llmg_0228	4	0	-
llmg_0229	hypothetical protein	llmg_0229	0	M	-
llmg_0230	inositol-5-monophosphate dehydrogenase	guaB	0	FR	N,X
llmg_0231	hypothetical protein	llmg_0231	0	R	-
llmg_0232	hypothetical protein	llmg_0232	0	LR	-
llmg_0233	GTP-binding protein hflX	hflX	0	R	-
llmg_0234	putative secreted protein	llmg_0234	1	0	-
llmg_0235	hypothetical protein	llmg_0235	0	J	U
llmg_0236	nicotinate-nucleotide adenylyltransferase	nadD1	0	H	V
llmg_0237	putative hydrolase	llmg_0237	0	H	-		-2.1525
llmg_0238	hypothetical protein	llmg_0238	0	KR	A,B,L,X
llmg_0239	hypothetical protein	llmg_0239	0	S	-
llmg_0240	hypothetical protein	llmg_0240	0	QR	-
llmg_0241	putative nucleotidyltransferase	llmg_0241	0	R	-	-1.50987
llmg_0242	hypothetical protein	llmg_0242	0	S	-
llmg_0244	uracil-DNA glycosylase	ung	0	L	R
llmg_0245	putative zinc-binding dehydrogenase	llmg_0245	1	CR	-
llmg_0246	hypothetical protein	llmg_0246	0	MG	-
llmg_0247	putative UDP-glucose 4-epimerase	llmg_0247	0	MG	C
llmg_0248	transcriptional regulator, TetR family	llmg_0248	0	K	-
llmg_0249	putative transporter	llmg_0249	14	GEPR	-
llmg_0250	transcriptional regulator, MerR family	rmeC	0	K	-
llmg_0251	30S ribosomal protein S21	rpsU	0	J	U
llmg_0252	hypothetical protein	llmg_0252	0	R	-
llmg_0253	phosphoglycerate kinase	pgk	0	G	C,E
llmg_0254	cryptic haloacid dehalogenase 1	hadL	0	R	X
llmg_0255	dihydroxyacetone kinase DhaK	dhaK	0	G	L
llmg_0257	dihydroxyacetone kinase DhaM	dhaM	0	G	L
llmg_0258	hypothetical protein	llmg_0258	0	S	-
llmg_0260	PepDA protein	pepDA	0	E	-
llmg_0262	ABC transporter permease protein	llmg_0262	6	V	M
llmg_0263	putative methyltransferase	llmg_0263	0	R	-
llmg_0264	fructose-bisphosphatase	fbp	0	G	C,E
llmg_0264	fructose-bisphosphatase	fbp	0	G	C,E
llmg_0265	putative flavoprotein	llmg_0265	0	R	-
llmg_0266	putative sugar kinase	llmg_0266	0	G	-
llmg_0267	hypothetical protein	llmg_0267	0	R	-
llmg_0268	ABC transporter ATP binding protein	llmg_0268	6	V	M
llmg_0269	ABC transporter ATP-binding and permease protein	llmg_0269	3	V	M	-2.12055
llmg_0270	hypothetical protein	llmg_0270	1	S	-
llmg_0271	oxidoreductase, Gfo/Idh/MocA family	llmg_0271	0	R	A,C,L,X
llmg_0272	hypothetical protein	llmg_0272	0	0	-
llmg_0273	S-ribosylhomocysteinase	luxS	0	T	A
llmg_0274	hypothetical protein	llmg_0274	0	0	-
llmg_0276	oxidoreductase, aldo/keto reductase family	llmg_0276	0	R	-
llmg_0277	amidase	llmg_0277	0	Q	-
llmg_0278	hypothetical protein	llmg_0278	0	0	-
llmg_0279	hypothetical protein	llmg_0279	0	0	-
llmg_0280	N-acetylglucosaminidase	acmA	1	MNU	-
llmg_0281	anaerobic ribonucleoside triphosphate reductase	llmg_0281	0	F	N
llmg_0282	anaerobic ribonucleoside-triphosphate reductase activating protein	nrdG	0	O	F
llmg_0283	hypothetical protein	llmg_0283	0	0	-
llmg_0284	hypothetical protein	llmg_0284	3	0	-
llmg_0286	putative secreted protein	llmg_0286	0	0	-
llmg_0287	putative cobalt ABC transporter ATP binding protein	cbiO3	0	P	M
llmg_0288	putative cobalt ABC transporter ATP binding protein	cbiO2	0	P	M
llmg_0289	putative cobalt ABC transporter permease protein	cbiQ2	5	P	M
llmg_0290	hypothetical protein	llmg_0290	0	OC	-
llmg_0291	2,3,4,5-tetrahydropyridine-2-carboxylate N-succinyltransferase	dapD	0	E	A
llmg_0292	putative hippurate hydrolase	hipO1	0	R	A	2.20864
llmg_0293	endo-1,4-beta-xylanase D	xynD	1	G	-
llmg_0294	hypothetical protein	llmg_0294	0	0	-
llmg_0295	hypothetical protein	llmg_0295	11	0	-
llmg_0295	hypothetical protein	llmg_0295	11	0	-
llmg_0295	hypothetical protein	llmg_0295	11	0	-
llmg_0296	30S ribosomal protein S4	rpsD	0	J	U		-1.8926
llmg_0297	transcription accessory protein TEX	tex	0	K	-
llmg_0297	transcription accessory protein TEX	tex	0	K	-
llmg_0298	hypothetical protein	llmg_0298	0	S	-
llmg_0299	adenosine deaminase	add	0	F	N	2.28608
llmg_0300	hypothetical protein	llmg_0300	0	0	-
llmg_0301	transcriptional regulator, MerR family	llmg_0301	0	K	-
llmg_0302	Putative Zn-dependent hydrolase	llmg_0302	0	R	-
llmg_0302	Putative Zn-dependent hydrolase	llmg_0302	0	R	-
llmg_0304	hypothetical protein	llmg_0304	0	S	-
llmg_0305	hypothetical protein	llmg_0305	0	0	-
llmg_0306	Putative O-sialoglycoprotein endopeptidase	llmg_0306	0	O	-
llmg_0307	ribosomal-protein-alanine N-acetyltransferase	llmg_0307	0	R	U
llmg_0308	Ribosomal-protein-alanine acetyltransferase	rimI2	0	R	U
llmg_0309	O-sialoglycoprotein endopeptidase	gcp	0	O	-
llmg_0310	hypothetical protein	llmg_0310	0	0	-
llmg_0311	hypothetical protein	llmg_0311	0	0	-
llmg_0312	phosphonate ABC transporter, phosphonate-binding protein phnD	phnD	0	P	M
llmg_0312	phosphonate ABC transporter, phosphonate-binding protein phnD	phnD	0	P	M
llmg_0313	phosphonates import ATP-binding protein phnC	phnC	0	P	M
llmg_0314	phosphonate transport system permease protein phnB	phnB	6	P	M	-1.51587
llmg_0315	Phosphonate ABC transporter permease protein	llmg_0315	6	P	M
llmg_0316	2',3'-cyclic-nucleotide 2'-phosphodiesterase	cpdC	0	F	N
llmg_0317	hypothetical protein	llmg_0317	0	0	-
llmg_0318	thiol peroxidase	tpx	0	O	F
llmg_0319	PepN protein	pepN	0	E	A	1.53503
llmg_0319	PepN protein	pepN	0	E	A
llmg_0320	multidrug-efflux transporter protein	napC	11	GEPR	M
llmg_0321	transcriptional regulator, MarR family	napB	0	K	-
llmg_0322	cation transporter	llmg_0322	4	P	-
llmg_0323	transcriptional regulator, PadR-like family	llmg_0323	0	K	-
llmg_0324	multidrug resistance protein C	lmrC	6	V	M
llmg_0325	multidrug resistance protein D	lmrD	6	V	M
llmg_0326	UDP-N-acetylglucosamine 1-carboxyvinyltransferase	murA1	0	M	C
llmg_0327	hypothetical protein	llmg_0327	0	S	-
llmg_0328	hypothetical protein	llmg_0328	0	0	-
llmg_0329	ABC transporter ATP binding and permease protein	llmg_0329	5	V	M
llmg_0330	putative permease protein	llmg_0330	8	GEPR	-
llmg_0332	putative biotin synthesis protein	llmg_0332	6	R	-
llmg_0333	hypothetical protein	llmg_0333	0	S	-
llmg_0334	hypothetical protein	llmg_0334	6	S	-
llmg_0335	D-methionine-binding lipoprotein plpA precursor	plpA	1	P	M	2.41454
llmg_0335	D-methionine-binding lipoprotein plpA precursor	plpA	1	P	M
llmg_0336	D-methionine-binding lipoprotein plpB precursor	plpB	1	P	M
llmg_0338	D-methionine-binding lipoprotein plpC precursor	plpC	1	P	M	3.0777
llmg_0338	D-methionine-binding lipoprotein plpC precursor	plpC	1	P	M	2.75414
llmg_0339	acetoin(diacetyl)reductase	dar	0	IQR	C	2.3679
llmg_0340	D-methionine-binding lipoprotein plpD precursor	plpD	1	P	M
llmg_0341	amino acid ABC transporter ATP binding protein	llmg_0341	0	P	M
llmg_0342	amino acid ABC transporter permease protein	llmg_0342	5	P	M	1.57983
llmg_0343	hypothetical protein	llmg_0343	5	S	-
llmg_0344	putative cobalt ABC transporter ATP-binding protein	cbiO	0	P	M
llmg_0344	putative cobalt ABC transporter ATP-binding protein	cbiO	0	P	M
llmg_0345	putative cobalt ABC transporter permease protein	cbiQ	5	P	M
llmg_0346	ferrichrome ABC transporter fhuC	fhuC	0	PH	M
llmg_0347	ferrichrome ABC transporter permease protein	fhuB	9	P	M
llmg_0348	ferrichrome ABC transporter permease protein	fhuG	9	P	M
llmg_0349	ferrichrome ABC transporter substrate binding protein	fhuD	0	P	M
llmg_0350	HTH-type transcriptional regulator fhuR	fhuR	0	K	-
llmg_0350	HTH-type transcriptional regulator fhuR	fhuR	0	K	-
llmg_0351	putative arabinose efflux permease	araJ	12	G	M
llmg_0352	oxidoreductase, aldo/keto reductase family	llmg_0352	0	R	-
llmg_0353	putative transcription regulator	llmg_0353	0	K	-
llmg_0354	putative glyoxylase	llmg_0354	0	E	-
llmg_0355	phosphoglycerate mutase	pmg	0	G	C
llmg_0356	alkyl hydroperoxide reductase subunit C	ahpC	0	O	F
llmg_0357	alkyl hydroperoxide reductase subunit F	ahpF	0	O	F
llmg_0358	penicillin-binding protein 2B	pbp2B	1	M	L
llmg_0358	penicillin-binding protein 2B	pbp2B	1	M	L
llmg_0359	Recombination protein recR	recR	0	L	R
llmg_0360	D-alanyl-alanine synthetase A	ddl	0	M	A,G
llmg_0361	UDP-N-acetylmuramoylalanyl-D-glutamyl-2,6- diaminopimelate--D-alanyl-D-alanine ligase	murF	0	M	A,G
llmg_0362	dipeptide-binding protein precursor	dppA	0	E	M
llmg_0364	dipeptide transport system permease protein dppB	dppB	6	EP	M
llmg_0365	dipeptide transport system permease protein dppC	dppC	5	EP	M
llmg_0366	dipeptide transport ATP-binding protein dppD	dppD	0	EP	M
llmg_0367	dipeptide transport ATP-binding protein dppF	dppF	0	E	M
llmg_0368	peptide chain release factor 3	prfC	0	J	U
llmg_0369	ATP-dependent RNA helicase	rheA	0	LKJ	R
llmg_0369	ATP-dependent RNA helicase	rheA	0	LKJ	R
llmg_0371	GTP-binding protein Era	era	0	R	-
llmg_0372	asparagine synthetase B	asnB	0	E	A,E	4.39249
llmg_0373	formamidopyrimidine-DNA glycosylase	fpg	0	L	R
llmg_0374	recombinase A	recA	0	L	R
llmg_0374	recombinase A	recA	0	L	R
llmg_0375	amino acid permease	llmg_0375	12	E	M
llmg_0376	amino acid permease	llmg_0376	12	E	M
llmg_0377	hypothetical protein	llmg_0377	0	S	-
llmg_0378	hypothetical protein	llmg_0378	0	S	-
llmg_0379	hypothetical protein	llmg_0379	0	0	-
llmg_0380	hypothetical protein	llmg_0380	0	S	-
llmg_0381	hypothetical protein	llmg_0381	8	S	-
llmg_0382	putative GTP pyrophosphokinase	llmg_0382	0	S	N
llmg_0383	inorganic polyphosphate/ATP-NAD kinase	ppnK	0	G	V
llmg_0384	ribosomal large subunit pseudouridine synthase	rluE	0	J	U
llmg_0385	peptidyl-prolyl cis-trans isomerase, cyclophilin-type	ppiA	1	O	F
llmg_0386	Amino-acid permease lysQ	lysQ	12	E	-	3.35248
llmg_0387	hypothetical protein	llmg_0387	0	R	-
llmg_0388	thiamine biosynthesis lipoprotein apbE precursor	apbE	0	H	-
llmg_0389	lysyl-tRNA synthetase	lysS	0	J	U,A
llmg_0390	transcriptional regulator, LysR family	rlrG	0	K	-
llmg_0391	hypothetical protein	llmg_0391	9	S	-
llmg_0392	L-lactate dehydrogenase	ldhB	0	C	A,C
llmg_0393	transcriptional regulator, LysR family	rlrD	0	K	-
llmg_0394	putative permease protein	llmg_0394	10	P	M
llmg_0395	thiamine biosynthesis protein thiI	thiI	0	H	V
llmg_0396
llmg_0396
llmg_0397	NAD(P)H dehydrogenase (quinone)	llmg_0397	0	I	-
llmg_0398	hypothetical protein	llmg_0398	0	O	-	1.60549
llmg_0399	Na+/H+ antiporter	nha	12	P	M
llmg_0399	Na+/H+ antiporter	nha	12	P	M
llmg_0400	hypothetical protein	llmg_0400	0	0	-
llmg_0400	hypothetical protein	llmg_0400	0	0	-
llmg_0401	tyrosyl-tRNA synthetase	tyrS	0	J	U,A
llmg_0402	Penicillin-binding protein 1B	pbp1B	1	M	-
llmg_0403	Glutamyl-aminopeptidase	pepA	0	G	-
llmg_0405	putative secreted protein	llmg_0405	0	0	-
llmg_0406	Thioredoxin H-type	trxH	0	OC	-
llmg_0407	Phenylalanyl-tRNA synthetase beta chain	pheT	0	R	-
llmg_0408	NADH oxidase	noxE	0	R	-
llmg_0409	single-strand DNA-binding protein	ssbA	0	L	R
llmg_0410	co-chaperonin GroES	groES	0	O	F
llmg_0411	chaperonin GroEL	groEL	0	O	F
llmg_0412	Ribonuclease Z	vicX	0	R	U	-1.60229
llmg_0413	sensor histidine kinase	kinC	2	T	S
llmg_0413	sensor histidine kinase	kinC	2	T	S
llmg_0414	two-component system regulator	llrC	0	TK	S
llmg_0415	thymidylate kinase	tdk	0	F	N
llmg_0416	DNA polymerase III subunit delta'	holB	0	L	R,N
llmg_0417	hypothetical protein	llmg_0417	0	S	-
llmg_0418	DNA replication intiation control protein YabA	llmg_0418	0	S	-
llmg_0419	hypothetical protein	llmg_0419	0	R	-
llmg_0420	hypothetical protein	llmg_0420	0	0	-
llmg_0421	daunorubicin resistance transmembrane protein	drrB	6	V	M
llmg_0422	hypothetical protein	llmg_0422	0	V	-
llmg_0423	daunorubicin resistance ABC transporter ATP-binding subunit	drrA	0	V	M
llmg_0424	transcriptional regulator	llmg_0424	0	K	-
llmg_0425	Mvk protein	mvk	0	I	L	-1.71714
llmg_0425	Mvk protein	mvk	0	I	L
llmg_0426	diphosphomevalonate decarboxylase	mvaD	0	I	L
llmg_0427	phosphomevalonate kinase	llmg_0427	0	I	L
llmg_0427	phosphomevalonate kinase	llmg_0427	0	I	L
llmg_0428	isopentenyl pyrophosphate isomerase	fni	0	C	B,L
llmg_0429	SodA protein	sodA	0	P	-
llmg_0430	carbon starvation protein A	cstA	16	T	-
llmg_0430	carbon starvation protein A	cstA	16	T	-
llmg_0431	putative acyl carrier protein phosphodiesterase 2	llmg_0431	0	I	-
llmg_0432	similar to transcription regulator	llmg_0432	0	K	-
llmg_0433	ATP-dependent RNA helicase	rheB	0	LKJ	-
llmg_0434	SanA protein homolog	llmg_0434	1	S	-
llmg_0435	Putative HTH-type transcriptional regulator	hexR	0	K	-
llmg_0437	PTS system, IIB component	ptcB	0	G	M
llmg_0438	PTS system, cellobiose-specific IIA component	ptcA	1	G	M
llmg_0439	transcriptional regulator, LacI family	llmg_0439	0	K	-
llmg_0440	cellobiose-specific PTS system IIC component	ptcC	10	G	M
llmg_0441	6-phospho-beta-glucosidase	celA	0	G	C
llmg_0443	hypothetical protein	llmg_0443	0	0	-
llmg_0444	NAD-dependent DNA ligase LigA	ligA	0	L	R	-1.55365
llmg_0445	putative lipid kinase	llmg_0445	0	IR	-
llmg_0446	multiple sugar-binding transport ATP-binding protein	msmK	0	G	M
llmg_0447	NifJ protein	nifJ	0	C	C,E	1.57208
llmg_0448	hypothetical protein	llmg_0448	3	S	-
llmg_0449	hypothetical protein	llmg_0449	1	S	-
llmg_0450	hypothetical protein	llmg_0450	0	S	-
llmg_0451	putative phospho-sugar mutase	femD	0	G	B,C
llmg_0452	trehalose operon transcriptional repressor	treR	0	K	T
llmg_0453	similar to sucrose-specific PTS enzyme IIABC	llmg_0453	0	G	M
llmg_0454	putative beta-glucosides-specific IIBC component	llmg_0454	10	G	M
llmg_0455	putative trehalose/maltose hydrolase	trePP	0	G	C
llmg_0455	putative trehalose/maltose hydrolase	trePP	0	G	C
llmg_0456	beta-phosphoglucomutase	pgmB	0	R	C
llmg_0457	lipase/esterase (putative)	llmg_0457	0	I	-
llmg_0458	Glucosyltransferase-I precursor	llmg_0458	2	0	S,C
llmg_0459	hypothetical protein	llmg_0459	0	R	-
llmg_0460	hypothetical acetyltransferase	llmg_0460	0	KR	A,B,L,X
llmg_0461	transcription regulator	lytR	1	K	-
llmg_0462	tRNA pseudouridine synthase A	truA	0	J	U
llmg_0463	phosphomethylpyrimidine kinase	thiD2	0	H	V
llmg_0464	Hypothetical protein in GAPDH 3'region	llmg_0464	4	S	-
llmg_0465	hypothetical protein	llmg_0465	0	S	-
llmg_0466	putative aminotransferase	aspC	0	E	-
llmg_0467	CTP synthetase	pyrG	0	F	N
llmg_0467	CTP synthetase	pyrG	0	F	N
llmg_0468	hypothetical protein	llmg_0468	2	0	-
llmg_0469	hypothetical protein	llmg_0469	0	0	-
llmg_0470	hypothetical protein	llmg_0470	0	0	-
llmg_0471	hypothetical protein	llmg_0471	0	0	-
llmg_0472	hypothetical protein	llmg_0472	0	0	-
llmg_0473	hypothetical protein	llmg_0473	0	0	-
llmg_0473	hypothetical protein	llmg_0473	0	0	-
llmg_0474	hypothetical protein	llmg_0474	2	0	-
llmg_0475	Malate/lactate dehydrogenase	llmg_0475	0	C	A,C,L,X
llmg_0476	hypothetical protein	llmg_0476	2	S	-
llmg_0477	hypothetical protein	llmg_0477	2	0	-
llmg_0478	nucleoside deoxyribosyltransferase	ntd	0	F	N
llmg_0479	hypothetical protein	llmg_0479	0	R	-
llmg_0480	deoxyguanosine kinase	dukA	0	F	N
llmg_0481	hypothetical protein	llmg_0481	1	R	-	1.59673
llmg_0482	hypothetical protein	llmg_0482	0	S	-
llmg_0483	DNA polymerase III DnaE	dnaE	0	L	R,N
llmg_0483	DNA polymerase III DnaE	dnaE	0	L	R,N
llmg_0483	DNA polymerase III DnaE	dnaE	0	L	R,N
llmg_0484	transcriptional regulator, LacI family	llmg_0484	0	K	-
llmg_0485	hypothetical protein	llmg_0485	3	0	-
llmg_0486	hypothetical protein	llmg_0486	3	0	-
llmg_0486	hypothetical protein	llmg_0486	3	0	-
llmg_0487	putative trehalose/maltose hydrolase	llmg_0487	0	G	-
llmg_0488	multiple sugar-binding protein precursor	llmg_0488	1	G	M
llmg_0489	sugar transport system permease protein	llmg_0489	6	G	-
llmg_0490	sugar transport system permease protein	llmg_0490	6	G	M
llmg_0491	hemolysin like protein	hly	7	R	-
llmg_0492	hypothetical protein	llmg_0492	0	S	-		-1.9779
llmg_0493	putative esterase/lipase	llmg_0493	1	E	-
llmg_0494	putative beta-N-acetylglucosaminidase	nagZ	1	G	C,G
llmg_0495	hypothetical protein	llmg_0495	1	S	-
llmg_0496	HU-like DNA-binding protein	hllA	0	L	R
llmg_0496	HU-like DNA-binding protein	hllA	0	L	R
llmg_0497	hypothetical protein	llmg_0497	0	KR	-
llmg_0498	6-O-methylguanine-DNA methyltransferase	ogt	0	L	R
llmg_0499	methylphosphotriester-DNA alkyltransferase	adaA	0	F	T
llmg_0500	Arylamine N-acetyltransferase 2	nhoA	0	Q	-
llmg_0501	ABC transporter ATP binding protein	llmg_0501	0	V	-
llmg_0502	ABC transporter permease protein	llmg_0502	6	V	M	-8.66173
llmg_0503	transcriptional regulator, LytR family	llmg_0503	0	KT	-	-2.77398
llmg_0504	hypothetical protein	llmg_0504	4	0	-
llmg_0505	pyridoxal-phosphate dependent aminotransferase	nifZ	0	E	V	-1.83545
llmg_0506	hypothetical protein	llmg_0506	1	MR	-
llmg_0507	peptide binding protein	llmg_0507	0	E	M
llmg_0507	peptide binding protein	llmg_0507	0	E	M
llmg_0508	cysteine synthase	llmg_0508	0	E	A,E	-1.75463
llmg_0509	N-acetylglucosaminidase	acmD	0	MNU	G
llmg_0510	Putative Zn-dependent hydrolase of metallo-beta-lactamase superfamily	llmg_0510	0	R	-
llmg_0511	penicillin-binding protein 1a	ponA	1	M	-
llmg_0511	penicillin-binding protein 1a	ponA	1	M	-
llmg_0511	penicillin-binding protein 1a	ponA	1	M	-
llmg_0512	Holliday junction-specific endonuclease	recU	0	R	R
llmg_0513	hypothetical protein	llmg_0513	0	S	-
llmg_0514	hypothetical protein	llmg_0514	0	P	-
llmg_0515	hypothetical protein	llmg_0515	0	S	-
llmg_0516	putative myo-inositol-1(or 4)-monophosphatase	suhB	0	G	B,C
llmg_0517	UDP-N-acetylglucosamine 1-carboxyvinyltransferase	murA2	0	M	C
llmg_0518	hypothetical protein	llmg_0518	1	0	-
llmg_0519	trigger factor	tig	0	O	F
llmg_0520	DNA primase	dnaG	0	L	R
llmg_0521	RNA polymerase sigma factor RpoD	rpoD	0	JK	T
llmg_0522	putative transcriptional regulator	llmg_0522	0	K	-
llmg_0523	Glycerol-3-phosphate transporter	glpT	12	G	M
llmg_0524	hypothetical protein	llmg_0524	2	0	-
llmg_0525	hypothetical protein	llmg_0525	1	0	-
llmg_0526	hypothetical protein	llmg_0526	1	T	-
llmg_0527	hypothetical protein	llmg_0527	0	0	-
llmg_0528	ATP-dependent Clp protease ATP-binding subunit clpE	clpE	0	O	F
llmg_0529	putative transcriptional regulator	llmg_0529	0	K	-
llmg_0530	glyceraldehyde 3-phosphate dehydrogenase	gapA	0	G	C
llmg_0531	hypothetical protein	llmg_0531	1	0	-
llmg_0532	peptide deformylase	def	0	J	-
llmg_0533	dinucleoside polyphosphate hydrolase	nudH	0	LR	-
llmg_0534	excinuclease ABC subunit B	uvrB	0	L	R
llmg_0534	excinuclease ABC subunit B	uvrB	0	L	R
llmg_0535	Arginine-binding periplasmic protein 1 precursor	gltS	0	ET	M
llmg_0536	acetylornithine deacetylase	argE	0	E	A	2.97553
llmg_0538	(3R)-hydroxymyristoyl-(acyl-carrier-protein) dehydratase	llmg_0538	0	I	L
llmg_0539	enoyl-(acyl carrier protein) reductase	fabI	0	I	L
llmg_0540	OxaA-like protein precursor	oxaA2	6	U	F
llmg_0541	alpha-phosphoglucomutase	pgmA	0	R	-
llmg_0542	hypothetical protein	llmg_0542	6	S	-
llmg_0543	phosphopantothenoylcysteine decarboxylase	dfpA	0	H	V
llmg_0544	phosphopantothenate--cysteine ligase	dfpB	0	H	V
llmg_0546	Probable 4-oxalocrotonate tautomerase	xylH	0	R	X
llmg_0547	cation-transporting ATPase, E1-E2 family	ctpE	9	P	-
llmg_0547	cation-transporting ATPase, E1-E2 family	ctpE	9	P	-
llmg_0547	cation-transporting ATPase, E1-E2 family	ctpE	9	P	-
llmg_0548	hypothetical protein	llmg_0548	0	KR	-
llmg_0551	hypothetical protein	llmg_0551	1	0	-
llmg_0552	putative glyoxylase	llmg_0552	0	E	-
llmg_0553	hypothetical protein	llmg_0553	0	S	-
llmg_0555	thymidine kinase	tdk	0	F	N,X
llmg_0556	hypothetical protein	llmg_0556	2	0	-
llmg_0557	peptide chain release factor 1	prfA	0	J	U
llmg_0558	hypothetical protein	llmg_0558	0	0	-
llmg_0559	NADPH-flavin oxidoreductase	llmg_0559	0	C	-
llmg_0560	putative protoporphyrinogen oxidase	hemK	0	J	V
llmg_0561	putative acetyltransferase	llmg_0561	0	KR	-
llmg_0562	putative translation factor	llmg_0562	0	J	U
llmg_0563	serine hydroxymethyltransferase	glyA	0	E	A,E,V		-1.5543
llmg_0564	putative soluble lytic murein transglycosylase	llmg_0564	1	M	-
llmg_0564	putative soluble lytic murein transglycosylase	llmg_0564	1	M	-
llmg_0565	phosphoserine aminotransferase	serC	0	HE	A,V
llmg_0566	D-3-phosphoglycerate dehydrogenase	serA	0	HE	A
llmg_0567	SerB protein	serB	0	E	A
llmg_0568	putative acylphosphate phosphohydrolase	llmg_0568	0	C	C,X
llmg_0570	rRNA methyltransferase	spoU	0	J	U
llmg_0571	hypothetical protein	llmg_0571	0	S	-
llmg_0572	putative transcriptional regulator, MerR family	llmg_0572	0	K	-
llmg_0572	putative transcriptional regulator, MerR family	llmg_0572	0	K	-
llmg_0573	hypothetical protein	llmg_0573	0	C	E
llmg_0574	flavodoxin	fld	0	C	-
llmg_0576	putative transcriptional regulator, TetR family	llmg_0576	0	K	-
llmg_0577	methionine aminopeptidase	pepM	0	J	U
llmg_0578	putative tRNA-processing ribonuclease BN	llmg_0578	6	S	-
llmg_0579	hypothetical protein	llmg_0579	4	S	-
llmg_0581	hypothetical protein	llmg_0581	1	0	-
llmg_0582	HPr kinase/phosphorylase	ptsK	0	T	-
llmg_0583	prolipoprotein diacylglyceryl transferase	lgt	5	M	-
llmg_0584	hypothetical protein	llmg_0584	1	R	-
llmg_0585	putative secreted protein	llmg_0585	1	0	-		-2.1958
llmg_0586	6-phosphogluconate dehydrogenase	gnd	0	G	A,C
llmg_0588	putative potassium transport system protein kupB	kupB	12	P	M
llmg_0589	hypothetical protein	llmg_0589	1	0	-
llmg_0590	hypothetical protein	llmg_0590	5	S	-
llmg_0591	tRNA delta(2)-isopentenylpyrophosphate transferase	miaA	0	J	U
llmg_0592	hypothetical protein	llmg_0592	0	0	-
llmg_0593	Prohibitin/stomatin like protein	llmg_0593	1	O	-
llmg_0594	phage integrase	ps201	0	L	-
llmg_0595	hypothetical protein	ps202	1	0	-
llmg_0596	hypothetical protein	ps203	0	0	-
llmg_0597	hypothetical protein	ps204	0	0	-
llmg_0598	cI-like repressor	ps205	0	K	-
llmg_0599	hypothetical protein	llmg_0599	12	0	-
llmg_0600	glycosyl transferase	llmg_0600	2	M	C
llmg_0600	glycosyl transferase	llmg_0600	2	M	C
llmg_0601	putative secreted protein	llmg_0601	0	0	-
llmg_0602	hypothetical protein	llmg_0602	0	0	-
llmg_0603	HTH-type transcriptional regulator	llmg_0603	0	K	-
llmg_0604	ribonuclease Z	llmg_0604	0	R	U
llmg_0605	Oxidoreductase	llmg_0605	0	R	-
llmg_0606	single strand DNA-specific exonuclease	recJ	0	LS	R
llmg_0606	single strand DNA-specific exonuclease	recJ	0	LS	R
llmg_0607	adenine phosphoribosyltransferase	apt	0	F	N
llmg_0608	DNA-directed RNA polymerase delta chain	rpoE	0	K	T,N
llmg_0609	putative aminodeoxychorismate lyase	pabC	1	R	-
llmg_0610	transcription elongation factor greA	greA	0	K	T
llmg_0611	hypothetical protein	llmg_0611	0	L	R
llmg_0612	hypothetical protein	llmg_0612	0	L	R
llmg_0614	transcriptional regulator ctsR	ctsR	0	K	T
llmg_0615	ATP-dependent Clp protease ATP-binding subunit	clpC	0	O	F
llmg_0616	Putative Sigma 54 modulation protein	yfiA	0	J	U
llmg_0617	phosphopyruvate hydratase	eno	0	G	C
llmg_0618	integrase-recombinase	xerD	0	L	-
llmg_0619	putative secreted protein	llmg_0619	0	0	-
llmg_0623	abortive phage resistance protein abiP	abiP	1	J	-
llmg_0624	Putative ABC transporter ATP binding protein	llmg_0624	0	V	M
llmg_0625	Putative ABC transporter permease protein	llmg_0625	4	V	M
llmg_0626	putative transcriptional regulator	llmg_0626	0	K	-
llmg_0627	long-chain acyl-CoA synthetase	fadD	0	I	C,E
llmg_0628	divalent cation transport-related protein	llmg_0628	2	P	M
llmg_0629	formate acetyltransferase	pfl	0	C	C
llmg_0630	dephospho-CoA kinase	coaE	0	H	V
llmg_0631	multidrug resistance efflux pump	pmrA	10	GEPR	-
llmg_0633	cell division protein ftsW1	ftsW1	10	D	D
llmg_0634	pyruvate carboxylase	pycA	0	C	A,C
llmg_0635	methylcitrate synthase	gltA	0	C	C
llmg_0635	methylcitrate synthase	gltA	0	C	C
llmg_0636	aconitate hydratase	citB	0	C	C,E
llmg_0636	aconitate hydratase	citB	0	C	C,E
llmg_0637	isocitrate dehydrogenase	icd	0	C	A,C,E
llmg_0637	isocitrate dehydrogenase	icd	0	C	A,C,E
llmg_0638	ATP-dependent Clp protease proteolytic subunit	clpP	0	OU	-
llmg_0639	hypothetical protein	llmg_0639	1	0	-
llmg_0640	transcriptional regulator Spx	spxA	0	P	-
llmg_0641	putative secreted protein	llmg_0641	0	0	-
llmg_0642	hypothetical protein	llmg_0642	10	0	-
llmg_0642	hypothetical protein	llmg_0642	10	0	-
llmg_0643	cation-transporting ATPase, E1-E2 family	pacL	8	P	V
llmg_0643	cation-transporting ATPase, E1-E2 family	pacL	8	P	V
llmg_0644	hypothetical protein	llmg_0644	4	S	-
llmg_0645	hypothetical protein	llmg_0645	5	0	-
llmg_0646	similar to intercellular adhesion protein A	icaA	5	M	-
llmg_0646	similar to intercellular adhesion protein A	icaA	5	M	-
llmg_0649	intercellular adhesion protein icaB	icaB	0	G	-
llmg_0650	Branched-chain amino acid transport system II carrier protein	brnQ	12	E	M	1.86438
llmg_0650	Branched-chain amino acid transport system II carrier protein	brnQ	12	E	M
llmg_0651	Putative acetyltransferase	llmg_0651	0	R	-
llmg_0651	Putative acetyltransferase	llmg_0651	0	R	-
llmg_0651	Putative acetyltransferase	llmg_0651	0	R	-
llmg_0655	transposase	llmg_0655	0	L	-
llmg_0655	transposase	llmg_0655	0	L	-
llmg_0658	type I restriction-modification system restriction subunit	hsdR	0	V	-
llmg_0658	type I restriction-modification system restriction subunit	hsdR	0	V	-
llmg_0659	putative type I site-specific deoxyribonuclease	hsdM	0	V	-
llmg_0660	probable specificity determinant HsdS	hsdS	0	V	-
llmg_0661	CorA like magnesium and cobalt transport protein	llmg_0661	2	P	-
llmg_0663	pyrrolidone-carboxylate peptidase	pcp	0	O	-
llmg_0664	amidase/aminoacylase	amd	1	R	A
llmg_0666	Oxalate/Formate Antiporter	oxlT	12	GEPR	M
llmg_0666	Oxalate/Formate Antiporter	oxlT	12	GEPR	M
llmg_0668	hypothetical protein	llmg_0668	0	KR	-
llmg_0669	hypothetical protein	llmg_0669	0	0	-
llmg_0671	hypothetical protein	llmg_0671	0	0	-
llmg_0673	hypothetical protein	llmg_0673	1	0	-
llmg_0674	transposase for insertion sequence element IS1297	tnp1297	0	L	R
llmg_0675	hypothetical protein	llmg_0675	0	0	-	1.69406
llmg_0676	hypothetical acetyltransferase	llmg_0676	0	KR	A,B,L,X	1.55826
llmg_0679	hypothetical protein	llmg_0679	2	0	-
llmg_0685	hypothetical protein	llmg_0685	0	0	-
llmg_0686	hypothetical protein	llmg_0686	0	0	-
llmg_0687	hypothetical protein	llmg_0687	0	0	-
llmg_0688	hypothetical protein	llmg_0688	0	0	-
llmg_0690	heavy metal-(Cd/Co/Hg/Pb/Zn)-translocating P-type ATPase	llmg_0690	7	P	V
llmg_0690	heavy metal-(Cd/Co/Hg/Pb/Zn)-translocating P-type ATPase	llmg_0690	7	P	V
llmg_0691	hypothetical protein	llmg_0691	0	0	-
llmg_0692	hypothetical protein	llmg_0692	0	P	-
llmg_0693	putative stress induced DNA binding protein	llmg_0693	0	0	-
llmg_0694	transcriptional regulator FNR like protein B	flpB	0	T	T
llmg_0695	hypothetical protein	llmg_0695	0	0	-
llmg_0696	hypothetical protein	llmg_0696	1	0	-
llmg_0697	oligopeptide transport ATP-binding protein oppD	oppD	0	EP	M	4.11742
llmg_0698	oligopeptide transport ATP-binding protein oppF	oppF	0	E	M	4.5367
llmg_0699	peptide transport system permease protein oppB	oppB	6	EP	M	4.54338
llmg_0700	oligopeptide transport system permease protein oppC	oppC	6	EP	M	4.91558
llmg_0701	Oligopeptide-binding protein oppA precursor	oppA	0	E	M	3.84725
llmg_0702	endopeptidase O	pepO	0	O	-	3.66965
llmg_0703	putative transposase	tnp1675	0	L	-
llmg_0704	hypothetical protein	llmg_0704	0	L	-
llmg_0705	hypothetical protein	llmg_0705	0	0	-
llmg_0706	hypothetical protein	llmg_0706	0	0	-
llmg_0707	hypothetical protein	llmg_0707	3	0	-
llmg_0708	hypothetical protein	llmg_0708	0	S	-
llmg_0709	transcriptional regulator, PadR-like family	llmg_0709	0	K	-
llmg_0710	hypothetical protein	llmg_0710	6	0	-
llmg_0711	DNA-invertase/resolvase	tnpR	0	L	-
llmg_0712	hypothetical protein	llmg_0712	0	0	-
llmg_0713	hypothetical protein	llmg_0713	0	0	-
llmg_0715	hypothetical protein	llmg_0715	1	0	-
llmg_0716	hypothetical protein	llmg_0716	0	0	-
llmg_0716	hypothetical protein	llmg_0716	0	0	-
llmg_0717	transposase for insertion sequence element IS946	tnp946	0	L	-
llmg_0718	putative nucleotide binding protein	llmg_0718	1	H	-
llmg_0719	Putative ABC transporter substrate binding protein	llmg_0719	0	E	-
llmg_0722	seryl-tRNA synthetase	serS	0	J	U,A
llmg_0724	hypothetical protein	llmg_0724	0	S	-
llmg_0725	hypothetical protein	llmg_0725	5	S	-
llmg_0726	hypothetical protein	llmg_0726	1	S	-
llmg_0727	PTS system, mannose-specific IID component	ptnD	4	G	M,C
llmg_0728	PTS system, mannose-specific IIC component	ptnC	7	G	M,C
llmg_0729	PTS system, mannose-specific IIAB components	ptnAB	0	G	M,C
llmg_0730	Ferredoxin	fer	0	C	-
llmg_0731	putative secreted protein	llmg_0731	1	M	-
llmg_0732	cytidylate kinase	cmk	0	F	N
llmg_0733	cell envelope-related transcriptional attenuator	llmg_0733	1	K	-
llmg_0733	cell envelope-related transcriptional attenuator	llmg_0733	1	K	-
llmg_0734	putative amidase	llmg_0734	0	Q	-
llmg_0736	hypothetical protein	llmg_0736	6	R	-
llmg_0737	Maltose ABC transporter permease protein malG	malG	6	G	M
llmg_0738	maltose transport system permease protein malF	malF	8	G	M
llmg_0739	maltose ABC transporter substrate binding protein	malE	0	G	M
llmg_0740	neopullulanase	dexC	0	G	-
llmg_0741	Oligo-1,6-alpha-glucosidase	dexA	0	G	C
llmg_0742	maltose O-acetyltransferase	maa	0	R	-
llmg_0743	alpha-amylase	amyY	0	G	C
llmg_0744	exo-alpha-1,4-glucosidase	agl	0	G	C
llmg_0745	maltose phosphorylase	mapA	0	G	C
llmg_0745	maltose phosphorylase	mapA	0	G	C
llmg_0746	putative maltose operon transcriptional repressor, LacI family	malR	0	K	T
llmg_0747	two-component system regulator llrF	llrF	0	TK	-
llmg_0748	Sensor protein kinase kinF	kinF	3	T	-
llmg_0749	1-deoxy-D-xylulose-5-phosphate synthase	dxsB	0	HI	L
llmg_0749	1-deoxy-D-xylulose-5-phosphate synthase	dxsB	0	HI	L
llmg_0750	hypothetical protein	llmg_0750	0	S	-
llmg_0751	6-phospho-beta-glucosidase	arb	0	G	C
llmg_0751	6-phospho-beta-glucosidase	arb	0	G	C
llmg_0752	phage infection protein	pip	6	S	-
llmg_0753	Ubiquinone/menaquinone biosynthesis methyltransferase	ubiE	0	H	V
llmg_0754	transcriptional regulator, Rgg family	llmg_0754	0	K	-
llmg_0755	hypothetical protein	llmg_0755	0	0	-
llmg_0756	putative secreted protein	llmg_0756	2	0	-
llmg_0757	hypothetical protein	llmg_0757	3	0	-
llmg_0758	putative chloride channel protein	eriC	9	P	-
llmg_0759	1,4-dihydroxy-2-naphthoate octaprenyltransferase	ubiA	8	H	G
llmg_0760	putative transglycosylase	llmg_0760	0	0	-	1.59436
llmg_0761	putative oxidoreductase	llmg_0761	0	R	-
llmg_0762	uridine kinase	udk	0	F	N,X
llmg_0763	phosphotransacetylase	eutD	0	C	A,C
llmg_0764	hypothetical protein	llmg_0764	4	0	-
llmg_0765	putative hydrolase	llmg_0765	0	R	-
llmg_0766	DNA translocase ftsK	ftsK	5	D	D,M
llmg_0767	hypothetical protein	llmg_0767	1	0	-
llmg_0768	DNA polymerase III subunit delta	holA	0	L	R,N
llmg_0768	DNA polymerase III subunit delta	holA	0	L	R,N
llmg_0769	Putative DivIVA cell division initiation protein	llmg_0769	0	D	-
llmg_0771	Putative N6-adenine-specific DNA methylase	llmg_0771	0	L	R
llmg_0771	Putative N6-adenine-specific DNA methylase	llmg_0771	0	L	R
llmg_0772	hypothetical protein	llmg_0772	1	0	-
llmg_0772	hypothetical protein	llmg_0772	1	0	-
llmg_0774	proline dipeptidase	pepQ	0	E	-		-1.693
llmg_0775	catabolite control protein A	ccpA	0	K	T
llmg_0776	TrxB2 protein	trxB2	0	O	N
llmg_0777	hypothetical protein	llmg_0777	4	R	-
llmg_0778	DNA mismatch repair protein mutS	mutS	0	L	R
llmg_0778	DNA mismatch repair protein mutS	mutS	0	L	R
llmg_0778	DNA mismatch repair protein mutS	mutS	0	L	R
llmg_0779	Thioredoxin	trxA	0	OC	F
llmg_0781	hypothetical protein	llmg_0781	0	O	-
llmg_0782	3-dehydroquinate dehydratase	aroD	0	E	A
llmg_0783	adenylosuccinate lyase	purB	0	F	A,N
llmg_0784	ribose operon repressor	rbsR	0	K	T
llmg_0785	ribokinase	rbsK	0	G	C
llmg_0786	high affinity ribose transport protein rbsD	rbsD	0	G	M
llmg_0787	ribose ABC transporter permease protein RbsD	rbsD	0	G	M
llmg_0788	ribose transport system permease protein RbsC	rbsC	9	G	M
llmg_0789	ribose ABC transporter substrate binding protein RbsB	rbsB	1	G	M
llmg_0790	putative integrase	ps301	0	L	-
llmg_0791	hypothetical protein	ps302	2	0	-
llmg_0792	hypothetical protein	ps303	0	0	-
llmg_0793	CI	ps304	0	K	-
llmg_0794	hypothetical protein	ps305	0	0	-
llmg_0795	hypothetical protein	ps306	0	K	-
llmg_0796	hypothetical protein	ps307	0	0	-
llmg_0797	hypothetical protein	ps308	0	K	T
llmg_0798	hypothetical protein	ps309	0	0	-
llmg_0800	hypothetical protein	ps310	0	0	-
llmg_0800	hypothetical protein	ps310	0	0	-
llmg_0801	hypothetical protein	ps311	0	0	-
llmg_0802	hypothetical protein	ps312	0	0	-
llmg_0803	putative transcription regulator	ps313	0	0	-
llmg_0804	hypothetical protein	ps314	0	0	-
llmg_0805	hypothetical protein	ps315	0	L	-
llmg_0805	hypothetical protein	ps315	0	L	-
llmg_0806	hypothetical protein	ps316	0	0	-
llmg_0807	putative replisome organiser protein	ps317	0	0	-
llmg_0807	putative replisome organiser protein	ps317	0	0	-
llmg_0808	hypothetical protein	ps318	0	L	-
llmg_0810	hypothetical protein	ps319	0	0	-
llmg_0811	hypothetical protein	ps320	0	0	-
llmg_0811	hypothetical protein	ps320	0	0	-
llmg_0812	hypothetical protein	ps321	0	0	-
llmg_0813	hypothetical protein	ps322	0	0	-
llmg_0814	hypothetical protein	ps323	0	0	-
llmg_0815	hypothetical protein	ps324	0	K	-
llmg_0817	hypothetical protein	ps326	0	0	-
llmg_0818	hypothetical protein	ps327	0	V	-
llmg_0819	hypothetical protein	ps328	0	0	-
llmg_0820	hypothetical protein	ps329	0	0	-
llmg_0821	hypothetical protein	ps330	0	0	-
llmg_0824	terminase small subunit	ps333	0	L	R
llmg_0824	terminase small subunit	ps333	0	L	R
llmg_0825	terminase large subunit	ps334	0	V	-
llmg_0826	portal protein	ps335	0	0	-
llmg_0826	portal protein	ps335	0	0	-
llmg_0830	hypothetical protein	ps336	0	J	-
llmg_0831	hypothetical protein	ps337	0	T	-
llmg_0832	hypothetical protein	ps338	0	0	-
llmg_0833	hypothetical protein	ps339	0	0	-
llmg_0834	hypothetical protein	ps340	0	0	-
llmg_0835	hypothetical protein	ps341	0	0	-
llmg_0835	hypothetical protein	ps341	0	0	-
llmg_0836	major head protein	ps342	0	N	-
llmg_0837	hypothetical protein	ps343	0	0	-
llmg_0839	hypothetical protein	ps345	0	0	-
llmg_0840	hypothetical protein	ps346	0	0	-
llmg_0841	major tail protein	ps347	0	0	-
llmg_0842	hypothetical protein	ps348	0	0	-
llmg_0843	hypothetical protein	ps349	0	0	-
llmg_0844	hypothetical protein	ps350	6	RS	-
llmg_0845	hypothetical protein	ps351	0	0	-
llmg_0846	hypothetical protein	ps352	0	0	-
llmg_0846	hypothetical protein	ps352	0	0	-
llmg_0848	hypothetical protein	ps353	0	0	-
llmg_0848	hypothetical protein	ps353	0	0	-
llmg_0849	hypothetical protein	ps354	1	0	-
llmg_0850	putative holin	ps355	2	0	-
llmg_0851	endolysin	ps356	1	M	-
llmg_0851	endolysin	ps356	1	M	-
llmg_0851	endolysin	ps356	1	M	-
llmg_0852	hypothetical protein	ps357	0	V	-
llmg_0853	hypothetical protein	ps358	1	0	-
llmg_0854	hypothetical protein	llmg_0854	0	0	-
llmg_0855	hypothetical protein	llmg_0855	0	0	-
llmg_0856	hypothetical protein	llmg_0856	14	GEPR	-	-1.70096
llmg_0856	hypothetical protein	llmg_0856	14	GEPR	-	-1.62287
llmg_0857	GntR family transcription regulator	kdgR	0	K	-
llmg_0858	fructuronate reductase	uxuB	0	G	C
llmg_0859	mannonate dehydratase	uxuA	0	G	C
llmg_0860	Na-galactoside symporter	uxuT	12	G	-
llmg_0861	hypothetical protein	llmg_0861	0	G	-
llmg_0862	glucuronate isomerase	uxaC	0	G	C
llmg_0864	keto-hydroxyglutarate-aldolase/keto-deoxy-phosphogluconate aldolase	kdgA	0	G	A,C
llmg_0865	transcriptional antiterminator, BglG family	llmg_0865	0	GTK	-
llmg_0865	transcriptional antiterminator, BglG family	llmg_0865	0	GTK	-
llmg_0866	PTS system, unknown pentitol phosphotransferase enzyme IIB component	llmg_0866	0	G	M,C
llmg_0867	ascorbate-specific PTS system enzyme IIC	ulaA	11	S	M,C
llmg_0868	transketolase	tkt	0	G	P,C,E
llmg_0868	transketolase	tkt	0	G	P,C,E
llmg_0869	hypothetical protein	llmg_0869	2	0	-	-1.68456
llmg_0870	Transporter	llmg_0870	6	G	-
llmg_0871	aspartate-semialdehyde dehydrogenase	asd	0	E	A	1.98324
llmg_0872	Putative (di)nucleoside polyphosphate hydrolase	llmg_0872	0	LR	V	2.05494
llmg_0873	Putative (di)nucleoside polyphosphate hydrolase	llmg_0873	0	LR	V	1.74746
llmg_0874	dihydrodipicolinate synthase	dapA	0	EM	A	1.84409
llmg_0875	cation-transporting ATPase	llmg_0875	4	S	M
llmg_0875	cation-transporting ATPase	llmg_0875	4	S	M
llmg_0876	metallo-beta-lactamase superfamily protein	llmg_0876	0	R	-
llmg_0877	putative secreted protein	llmg_0877	1	0	-	-2.30449
llmg_0878	signal recognition particle protein	ffh	0	U	F
llmg_0879	spermidine acetyltransferase	speG	0	J	A
llmg_0880	putative oxidoreductase	llmg_0880	0	R	-
llmg_0881	Branched-chain amino acid transport protein azlC	azlC	7	E	-
llmg_0882	hypothetical protein	llmg_0882	3	S	-
llmg_0883	hypothetical protein	llmg_0883	0	0	-
llmg_0884	hypothetical protein	llmg_0884	0	S	-
llmg_0885	gamma-glutamyl kinase	proB	0	E	A
llmg_0886	gamma-glutamyl phosphate reductase	proA	0	E	A
llmg_0886	gamma-glutamyl phosphate reductase	proA	0	E	A
llmg_0887	cation transport protein	llmg_0887	5	P	M
llmg_0888	transcriptional repressor, arsR family	rarA	0	K	-
llmg_0889	hypothetical protein	llmg_0889	6	0	-
llmg_0890	pyrimidine regulatory protein PyrR	pyrR	0	F	N
llmg_0891	uracil permease (Uracil transporter)	pyrP	10	F	M	-1.51445
llmg_0893	aspartate carbamoyltransferase catalytic subunit	pyrB	0	F	A,N
llmg_0894	carbamoyl phosphate synthase small subunit	carA	0	EF	A,N
llmg_0895	hypothetical protein	llmg_0895	0	0	-
llmg_0897	putative secreted protein	llmg_0897	2	0	-
llmg_0898	hypothetical protein	llmg_0898	0	0	-
llmg_0899	hypothetical protein	llmg_0899	0	0	-
llmg_0902	arsenate reductase	arsC	0	T	-
llmg_0903	putative serine/threonine phosphatase	llmg_0903	1	R	-
llmg_0904	immunogenic secreted protein precursor homolog	llmg_0904	0	R	-
llmg_0905	hypothetical protein	llmg_0905	0	0	-
llmg_0906	50S ribosomal protein L31 type B	rpmE	0	J	U
llmg_0907	hypothetical protein	llmg_0907	0	R	-
llmg_0908	two-component system regulator llrA	llrA	0	TK	-
llmg_0909	sensor protein kinase kinA	kinA	2	T	-
llmg_0910	ammonium transporter AmtB	amtB	11	P	M
llmg_0911	nitrogen regulatory protein P-II	glnB	0	E	S
llmg_0912	UDP-N-acetylmuramoyl-L-alanyl-D-glutamate synthetase	murD	1	M	A,G
llmg_0912	UDP-N-acetylmuramoyl-L-alanyl-D-glutamate synthetase	murD	1	M	A,G
llmg_0913	N-acetylglucosaminyl transferase	murG	0	M	G
llmg_0914	cell division protein ftsQ	ftsQ	1	M	D
llmg_0914	cell division protein ftsQ	ftsQ	1	M	D
llmg_0914	cell division protein ftsQ	ftsQ	1	M	D
llmg_0915	GTPase ObgE	obgE	0	R	-
llmg_0916	hypothetical protein	llmg_0916	0	0	-
llmg_0917	hypothetical protein	llmg_0917	0	0	-
llmg_0918	putative secreted protein	llmg_0918	2	0	-
llmg_0920	putative secreted protein	llmg_0920	0	0	-
llmg_0921	putative secreted protein	llmg_0921	0	0	-
llmg_0922	putative secreted protein	llmg_0922	0	0	-
llmg_0922	putative secreted protein	llmg_0922	0	0	-
llmg_0924	hypothetical protein	llmg_0924	1	0	-
llmg_0926	S-adenosylmethionine:tRNA ribosyltransferase-isomerase	queA	0	J	U
llmg_0927	putative extracellular hydrolase	llmg_0927	1	R	-
llmg_0928	glucosamine-6-phosphate isomerase	nagB	0	G	C	-2.0759
llmg_0929	hydroxymethylglutaryl-CoA synthase	hmcM	0	I	A,C,L
llmg_0929	hydroxymethylglutaryl-CoA synthase	hmcM	0	I	A,C,L
llmg_0930	ThiL protein	thiL	2	I	S,A,C,L,X
llmg_0931	MvaA protein	mvaA	0	I	L
llmg_0932	30S ribosomal protein S16	rpsP	0	J	U
llmg_0933	Putative RNA binding protein	llmg_0933	0	R	-
llmg_0933	Putative RNA binding protein	llmg_0933	0	R	-
llmg_0934	ferrochelatase	hemH	0	H	V
llmg_0935	putative lysophospholipase	llmg_0935	0	I	L
llmg_0936	16S rRNA-processing protein	rimM	0	J	U
llmg_0937	tRNA (guanine-N(1)-)-methyltransferase	trmD	0	J	U
llmg_0938	hypothetical protein	llmg_0938	0	S	-
llmg_0939	hypothetical protein	llmg_0939	0	S	-
llmg_0940	dihydrodipicolinate reductase	dapB	0	E	A
llmg_0941	acetyltransferase, GNAT family	llmg_0941	0	R	-
llmg_0942	tRNA CCA-pyrophosphorylase	papL	0	J	U
llmg_0942	tRNA CCA-pyrophosphorylase	papL	0	J	U
llmg_0943	PepDB protein	pepDB	0	E	-
llmg_0944	putative secreted protein	llmg_0944	1	0	-
llmg_0945	putative glycerol dehydrogenase	llmg_0945	0	C	B,X	4.72459
llmg_0947	Putative HTH-type transcriptional regulator cmhR	cmhR	0	K	-	4.10385
llmg_0948	ABC transporter ATP-binding protein	llmg_0948	0	R	-
llmg_0948	ABC transporter ATP-binding protein	llmg_0948	0	R	-
llmg_0950	putative oxidoreductase	llmg_0950	0	R	-
llmg_0951	MsrA protein	msrA	0	O	F
llmg_0952	dihydroorotate dehydrogenase 1A	pyrDA	0	F	N
llmg_0953	hypothetical protein	llmg_0953	5	S	-
llmg_0954	hypothetical protein	llmg_0954	0	0	-
llmg_0955	alcohol dehydrogenase	llmg_0955	0	ER	A,C,L,V,X
llmg_0956	transcriptional regulator, LacI family	llmg_0956	0	K	T
llmg_0957	ribulose-phosphate 3-epimerase	rpe2	0	G	C,E
llmg_0958	ribose-5-phosphate isomerase B	rpiB	0	G	C,E
llmg_0959	beta-glucosidase	llmg_0959	0	G	A,C
llmg_0960	beta-glucosidase	llmg_0960	0	G	A,C	-1.53281
llmg_0961	sugar kinase and transcriptional regulator	llmg_0961	0	KG	-
llmg_0962	transcriptional regulator, araC family	llmg_0962	0	K	-
llmg_0962	transcriptional regulator, araC family	llmg_0962	0	K	-
llmg_0963	PTS system, IIC component	llmg_0963	11	G	-
llmg_0963	PTS system, IIC component	llmg_0963	11	G	-
llmg_0964	thymidylate synthase	thyA	0	F	V,N
llmg_0965	hypothetical protein	llmg_0965	0	0	-
llmg_0965	hypothetical protein	llmg_0965	0	0	-
llmg_0966	transcriptional regulator, MarR family	rmaI	0	K	-
llmg_0967	putative permease protein	llmg_0967	14	GEPR	-
llmg_0968	oxidoreductase	llmg_0968	0	R	-
llmg_0969	hypothetical protein	llmg_0969	0	S	-
llmg_0970	carboxymuconolactone decarboxylase family protein	llmg_0970	0	S	X
llmg_0971	hypothetical protein	yphI	0	S	-
llmg_0972	hypothetical protein	llmg_0972	0	S	-
llmg_0973	phosphoribosylaminoimidazole-succinocarboxamide synthase	purC	0	F	N	-2.98067
llmg_0974	phosphoribosylformylglycinamidine synthetase PurS	purS	0	F	N	-2.97974
llmg_0975	phosphoribosylformylglycinamidine synthase I	purQ	0	F	N
llmg_0976	phosphoribosylformylglycinamidine synthase II	purL	0	F	N
llmg_0977	amidophosphoribosyltransferase	purF	0	F	A,N
llmg_0978	hypothetical protein	llmg_0978	0	0	-
llmg_0979	hypothetical protein	llmg_0979	3	0	-
llmg_0980	hypothetical protein	llmg_0980	8	0	-
llmg_0984	hypothetical protein	llmg_0984	1	0	-
llmg_0985	putative secreted protein	llmg_0985	0	0	-
llmg_0986	ATP-dependent Clp protease	clpB	0	O	F
llmg_0987	phosphoribosylaminoimidazole synthetase	purM	0	F	N
llmg_0988	phosphoribosylglycinamide formyltransferase	purN	0	F	V,N
llmg_0988	phosphoribosylglycinamide formyltransferase	purN	0	F	V,N
llmg_0989	ABC transporter ATP binding and permease protein	llmg_0989	4	V	M
llmg_0991	transcriptional regulator, AcrR family	llmg_0991	0	K	-
llmg_0992	putative nucleoside-diphosphate-sugar epimerases	llmg_0992	1	MG	-
llmg_0993	HprT protein	hprT	0	F	N,X	-2.0781
llmg_0994	bifunctional phosphoribosylaminoimidazolecarboxamide formyltransferase/IMP cyclohydrolase	purH	0	F	V,N
llmg_0994	bifunctional phosphoribosylaminoimidazolecarboxamide formyltransferase/IMP cyclohydrolase	purH	0	F	V,N
llmg_0994	bifunctional phosphoribosylaminoimidazolecarboxamide formyltransferase/IMP cyclohydrolase	purH	0	F	V,N
llmg_0995	hydrolase, haloacid dehalogenase-like family protein	llmg_0995	0	R	-
llmg_0996	transcriptional regulator, TetR family	llmg_0996	0	K	-
llmg_0997	phosphoribosylamine--glycine ligase	purD	0	F	N
llmg_0997	phosphoribosylamine--glycine ligase	purD	0	F	N
llmg_0999	phosphoribosylaminoimidazole carboxylase catalytic subunit	purE	0	F	N
llmg_1000	phosphoribosylaminoimidazole carboxylase ATPase subunit	purK	0	F	N
llmg_1001	xylose operon regulator	xylR	0	K	-
llmg_1002	XylA protein	xylA	0	G	C
llmg_1003	transposase for insertion sequence-like element IS1216	tnp1216	0	L	R
llmg_1004	beta-glucosidase	llmg_1004	0	G	A,C
llmg_1005	sugar kinase and transcriptional regulator	llmg_1005	0	KG	-
llmg_1006	fructokinase	scrK	0	KG	C
llmg_1008	bifunctional GMP synthase/glutamine amidotransferase protein	guaA	0	F	A,N,X
llmg_1009	sugar ABC transporter substrate binding protein	lplB	6	G	M
llmg_1010	sugar ABC transporter permease	lplC	6	G	M
llmg_1011	sugar ABC transporter substrate-binding protein	lplA	0	G	M
llmg_1012	putative ABC transporter substrate-binding protein	llmg_1012	0	0	-
llmg_1013	putative secreted protein	llmg_1013	1	0	-
llmg_1014	hypothetical protein	llmg_1014	0	0	-
llmg_1014	hypothetical protein	llmg_1014	0	0	-
llmg_1014	hypothetical protein	llmg_1014	0	0	-
llmg_1015	hypothetical protein	ypbC	12	V	-
llmg_1016	cationic transporter	llmg_1016	2	P	M
llmg_1016	cationic transporter	llmg_1016	2	P	M
llmg_1017	transcriptional regulator, MarR family	rmaE	0	K	-
llmg_1019	oxidoreductase, short-chain dehydrogenase/reductase family protein	llmg_1019	0	R	-
llmg_1020	transcriptional regulator, MerR family	rmeB	0	K	-
llmg_1021	hypothetical protein	llmg_1021	10	GER	-
llmg_1023	ferric uptake regulation protein	fur	0	P	T
llmg_1024	hypothetical protein	llmg_1024	5	S	-
llmg_1025	hypothetical protein	llmg_1025	4	S	-
llmg_1026	putative methyltransferase	llmg_1026	0	QR	-
llmg_1027	transcriptional regulator, MarR family	rmaC	0	K	-
llmg_1028	Putative NAD(P)H nitroreductase	llmg_1028	0	C	-
llmg_1029	hypothetical protein	llmg_1029	3	S	-
llmg_1030	anthranilate synthase component I	trpE	0	EH	S,A	2.92881
llmg_1031	anthranilate synthase component II	trpG	0	EH	A
llmg_1032	anthranilate phosphoribosyltransferase	trpD	0	E	S,A	2.06365
llmg_1034	hypothetical protein	llmg_1034	0	0	-	2.27494
llmg_1035	hypothetical protein	llmg_1035	0	0	-	3.06527
llmg_1038	indole-3-glycerol-phosphate synthase	trpC	0	E	S,A
llmg_1039	N-(5'-phosphoribosyl)-anthranilate isomerase	trpF	0	E	A
llmg_1040	acetyltransferase, GNAT family	llmg_1040	0	J	-	3.1981
llmg_1041	tryptophan synthase subunit beta	trpB	0	E	S,A	2.29815
llmg_1042	tryptophan synthase subunit alpha	trpA	0	E	S,A
llmg_1045	similar to PTS system, beta-glucosides specific enzyme IIABC	bglP	10	G	M
llmg_1046	beta-glucosidase	bglH	0	G	A,C
llmg_1047	transcriptional repressor BusR, GntR family	busR	0	PK	-
llmg_1048	glycine betaine/proline ABC transporter	busAA	0	E	M
llmg_1049	glycine betaine-binding periplasmic protein precursor	busAB	7	E	M	2.4353
llmg_1049	glycine betaine-binding periplasmic protein precursor	busAB	7	E	M
llmg_1050	putative secreted protein	llmg_1050	1	0	-
llmg_1051	transcriptional regulator	llmg_1051	0	K	-
llmg_1052	hypothetical protein	llmg_1052	0	R	-
llmg_1053	hypothetical protein	llmg_1053	0	R	-
llmg_1054	hypothetical protein	llmg_1054	0	K	-
llmg_1055	transcriptional regulator	llmg_1055	0	K	-
llmg_1056	cation transporter	llmg_1056	5	P	-
llmg_1057	phosphate-starvation-inducible protein PsiE	llmg_1057	4	0	-
llmg_1058	pantothenate kinase	coaA	0	H	V
llmg_1059	Ribosomal RNA small subunit methyltransferase C	rsmC	0	J	U
llmg_1060	pyrimidine-nucleoside phosphorylase	pdp	0	F	N
llmg_1061	putative secreted protein	llmg_1061	2	0	-	-1.53418
llmg_1062	DeoC protein	deoC	0	F	C
llmg_1063	Cdd protein	cdd	0	F	N,X
llmg_1064	basic membrane protein A	bmpA	0	R	-
llmg_1065	transcriptional regulator, Gntr family	rgrB	0	K	T
llmg_1066	hypothetical protein	llmg_1066	2	0	-
llmg_1067	Sensor protein kinase kinB	kinB	2	T	-
llmg_1068	two-component system regulator llrB	llrB	0	TK	-		-1.9407
llmg_1069	hypothetical protein	llmg_1069	0	S	-
llmg_1070	putative secreted protein	llmg_1070	0	0	-
llmg_1077	putative glyoxalase family protein	llmg_1077	0	E	-
llmg_1078	hypothetical protein	llmg_1078	0	0	-
llmg_1079	hypothetical protein	llmg_1079	1	S	-
llmg_1080	universal stress protein A2	uspA2	0	T	-
llmg_1081	putative secreted protein	llmg_1081	4	S	-
llmg_1082	hypothetical protein	llmg_1082	8	0	-
llmg_1083	hypothetical protein	llmg_1083	5	S	-
llmg_1084	hypothetical protein	llmg_1084	4	0	-
llmg_1085	hypothetical protein	llmg_1085	0	S	-
llmg_1086	similar to cation (calcium) transporting ATPase	llmg_1086	8	P	V
llmg_1086	similar to cation (calcium) transporting ATPase	llmg_1086	8	P	V
llmg_1087	N-acetylglucosaminidase	acmC	1	NU	G
llmg_1088	Gpo protein	gpo	0	O	A,L
llmg_1089	carbamoyl phosphate synthase large subunit	carB	0	EF	A,N	-2.09806
llmg_1090	putative secreted protein	llmg_1090	1	0	-
llmg_1091	putative secreted protein	llmg_1091	0	0	-
llmg_1092	hypothetical protein	llmg_1092	0	0	-
llmg_1093	putative secreted protein	llmg_1093	2	0	-
llmg_1093	putative secreted protein	llmg_1093	2	0	-
llmg_1094	putative secreted protein	llmg_1094	2	0	-
llmg_1095	hypothetical protein	llmg_1095	0	0	-
llmg_1096	hypothetical protein	llmg_1096	2	0	-
llmg_1097	glycerol uptake facilitator	glpF2	7	G	-
llmg_1098	GlpD protein	glpD	0	C	L	-1.66203
llmg_1098	GlpD protein	glpD	0	C	L
llmg_1099	glycerol kinase	glpK	0	C	L
llmg_1100	ribosomal large subunit pseudouridine synthase	rluC	0	J	U
llmg_1101	putative secreted protein	llmg_1101	2	R	-
llmg_1102	hypothetical protein	llmg_1102	1	RT	-
llmg_1103	hypothetical protein	llmg_1103	0	S	-
llmg_1104	drug-export protein	llmg_1104	14	GEPR	-
llmg_1105	dihydroorotate dehydrogenase, electron transfer subunit	pyrK	0	HC	-
llmg_1106	PyrDB protein	pyrDB	0	F	N
llmg_1107	orotidine 5'-phosphate decarboxylase	pyrF	0	F	N		-1.57
llmg_1108	hypothetical protein	llmg_1108	4	0	-
llmg_1109	glucose-inhibited division protein B	gidB	0	M	D
llmg_1110	similar to heptaprenyl diphosphate synthase component II	ispB	0	H	L
llmg_1111	heptaprenyl diphosphate synthase component I	gerCA	5	S	L
llmg_1112	hypothetical protein	llmg_1112	1	S	-
llmg_1113	UDP--glucose-1-phosphate uridylyltransferase	galU	0	M	C
llmg_1114	NAD(P)H-dependent glycerol-3-phosphate dehydrogenase	gpsA	0	C	L
llmg_1115	XpaC-like protein	llmg_1115	1	R	-
llmg_1116	toxic anion resistance protein	telA1	0	P	-		-1.5662
llmg_1117	NagA protein	nagA	0	G	C
llmg_1118	6-phosphofructokinase	pfk	0	G	C
llmg_1119	pyruvate kinase	pyk	0	G	C,E,N
llmg_1120	L-lactate dehydrogenase	ldh	0	C	A,C
llmg_1121	purine/cytidine ABC transporter permease protein	nupC	10	R	M
llmg_1122	purine/cytidine ABC transporter permease protein	nupB	8	R	M
llmg_1123	purine/cytidine ABC transporter ATP-binding protein	nupA	0	R	M
llmg_1124	hypothetical protein	llmg_1124	0	QR	-
llmg_1125	putative fibronectin-binding protein-like protein A	fbpA	0	K	-
llmg_1126	putative secreted protein	llmg_1126	2	0	-
llmg_1127	cell wall surface anchor family protein	llmg_1127	1	0	-
llmg_1127	cell wall surface anchor family protein	llmg_1127	1	0	-
llmg_1130	hypothetical protein	llmg_1130	0	P	-
llmg_1131	2-dehydropantoate 2-reductase	panE	0	H	V
llmg_1132	nuclease SbcCD subunit D	sbcD	0	L	R
llmg_1132	nuclease SbcCD subunit D	sbcD	0	L	R
llmg_1133	nuclease sbcCD subunit C	sbcC	0	L	R
llmg_1133	nuclease sbcCD subunit C	sbcC	0	L	R
llmg_1134	hypothetical protein	llmg_1134	0	S	-
llmg_1135	hypothetical protein	llmg_1135	0	R	-
llmg_1136	manganese ABC transporter ATP binding protein	mtsB	0	P	M
llmg_1137	manganese transport system membrane protein	mtsC	7	P	M
llmg_1137	manganese transport system membrane protein	mtsC	7	P	M
llmg_1138	manganese ABC transporter substrate binding protein	mtsA	0	P	M
llmg_1139	hypothetical protein	llmg_1139	0	0	-
llmg_1140	hypothetical protein	llmg_1140	0	0	-
llmg_1140	hypothetical protein	llmg_1140	0	0	-
llmg_1143	hypothetical protein	llmg_1143	0	K	-
llmg_1148	hypothetical protein	llmg_1148	1	0	-
llmg_1148	hypothetical protein	llmg_1148	1	0	-
llmg_1149	ornithine cyclodeaminase, mu-crystallin homolog	ocd	0	E	A
llmg_1150	hypothetical protein	llmg_1150	0	R	-
llmg_1151	hypothetical protein	llmg_1151	0	KE	-
llmg_1152	hypothetical protein	llmg_1152	1	0	-	-2.38406
llmg_1153	p-aminobenzoate synthetase, component II	pabA	0	EH	V
llmg_1154	para-aminobenzoate synthase component I	pabB	0	EH	V
llmg_1154	para-aminobenzoate synthase component I	pabB	0	EH	V
llmg_1155	spx-like protein	llmg_1155	0	P	-
llmg_1156	hypothetical protein	llmg_1156	0	0	-
llmg_1158	hypothetical protein	llmg_1158	0	S	-
llmg_1159	hypothetical protein	llmg_1159	0	S	-
llmg_1160	hypothetical protein	llmg_1160	0	0	-
llmg_1161	sialic acid-specific 9-O-acetylesterase	llmg_1161	0	O	-
llmg_1162	sialic acid-specific 9-O-acetylesterase	llmg_1162	0	0	-
llmg_1162	sialic acid-specific 9-O-acetylesterase	llmg_1162	0	0	-
llmg_1162	sialic acid-specific 9-O-acetylesterase	llmg_1162	0	0	-
llmg_1163	sugar ABC transporter substrate-binding protein	llmg_1163	0	G	-
llmg_1164	hypothetical protein	llmg_1164	6	G	-
llmg_1165	hypothetical protein	llmg_1165	6	G	-
llmg_1166	putative endoglucanase	llmg_1166	0	G	C
llmg_1167	putative endoglucanase	llmg_1167	1	0	C
llmg_1168	putative polysaccharide deacetylase	llmg_1168	0	G	-
llmg_1169	AguA protein	aguA	0	G	-
llmg_1169	AguA protein	aguA	0	G	-
llmg_1170	hypothetical protein	llmg_1170	0	0	-
llmg_1170	hypothetical protein	llmg_1170	0	0	-
llmg_1170	hypothetical protein	llmg_1170	0	0	-
llmg_1171	hypothetical protein	llmg_1171	0	E	-
llmg_1172	transcription regulator	rdrB	0	KG	-
llmg_1173	hypothetical protein	llmg_1173	1	0	-
llmg_1173	hypothetical protein	llmg_1173	1	0	-
llmg_1173	hypothetical protein	llmg_1173	1	0	-
llmg_1174	hypothetical protein	llmg_1174	0	KR	-
llmg_1175	ribosomal biogenesis GTPase	rbgA	0	R	-
llmg_1176	ribonuclease HII	rnhB	0	L	R
llmg_1177	positive regulator GadR	gadR	0	K	-
llmg_1178	putative glutamate/gamma-aminobutyrate antiporter	gadC	12	E	-
llmg_1179	glutamate decarboxylase	gadB	0	E	A,C
llmg_1180	hypothetical protein	llmg_1180	3	M	M
llmg_1181	branched-chain amino acid aminotransferase	ilvE	0	EH	A,V
llmg_1182	putative acetyltransferase	llmg_1182	0	R	A,B,L,X
llmg_1183	glutamate synthase, large subunit	gltB	0	E	A,E	3.9027
llmg_1184	glutamate synthase subunit beta	gltD	0	ER	A,E
llmg_1184	glutamate synthase subunit beta	gltD	0	ER	A,E
llmg_1185	LysA protein	lysA	0	E	A
llmg_1186	hypothetical protein	llmg_1186	1	S	-
llmg_1186	hypothetical protein	llmg_1186	1	S	-
llmg_1187	glutamate racemase	murI	0	M	A
llmg_1188	hypothetical protein	llmg_1188	0	F	V,N
llmg_1189	hypothetical protein	llmg_1189	0	R	-
llmg_1190	hypothetical protein	llmg_1190	0	R	-
llmg_1191	site-specific tyrosine recombinase XerD-like protein	xerD	0	L	-
llmg_1192	segregation and condensation protein A	scpA	0	S	D
llmg_1193	segregation and condensation protein B	scpB	0	K	D	1.58588
llmg_1194	pseudouridylate synthase	rluB	0	J	U	1.70634
llmg_1194	pseudouridylate synthase	rluB	0	J	U
llmg_1195	hypothetical protein	llmg_1195	6	S	-
llmg_1196	hypothetical protein	llmg_1196	0	0	-
llmg_1197	hypothetical protein	llmg_1197	0	E	-
llmg_1200	hypothetical protein	llmg_1200	2	E	-
llmg_1201	hypothetical protein	llmg_1201	0	0	-
llmg_1202	ABC transporter ABC binding and permease protein	llmg_1202	5	V	M	1.53953
llmg_1203	ABC transporter ABC binding and permease protein	llmg_1203	5	V	M	2.1389
llmg_1203	ABC transporter ABC binding and permease protein	llmg_1203	5	V	M
llmg_1203	ABC transporter ABC binding and permease protein	llmg_1203	5	V	M
llmg_1203	ABC transporter ABC binding and permease protein	llmg_1203	5	V	M
llmg_1204	HTH-type transcriptional regulator HdiR	hdiR	0	K	-
llmg_1205	hypothetical protein	llmg_1205	1	0	-
llmg_1207	50S ribosomal protein L10	rplJ	0	J	U
llmg_1208	50S ribosomal protein L7/L12	rplL	0	J	U
llmg_1208	50S ribosomal protein L7/L12	rplL	0	J	U
llmg_1209	transcriptional regulator, MarR family	rmaX	0	K	-
llmg_1210	multidrug resistance protein	llmg_1210	14	GEPR	-
llmg_1211	hypothetical protein	llmg_1211	2	0	-
llmg_1214	hypothetical protein	llmg_1214	3	0	-
llmg_1215	hypothetical protein	llmg_1215	10	M	-
llmg_1215	hypothetical protein	llmg_1215	10	M	-
llmg_1215	hypothetical protein	llmg_1215	10	M	-
llmg_1216	hydroxyethylthiazole kinase	thiM	0	H	V
llmg_1217	phosphomethylpyrimidine kinase	thiD1	0	H	V
llmg_1218	thiamine-phosphate pyrophosphorylase	thiE	0	H	V
llmg_1219	D-alanine--D-alanyl carrier protein ligase	dltA	0	Q	A
llmg_1220	protein dltB (Basic membrane protein) (BMP)	dltB	9	M	-
llmg_1221	D-alanine--poly(phosphoribitol) ligase subunit 2	dltC	0	IQ	A	1.68549
llmg_1222	D-alanine transfer protein DltD	dltD	1	M	-
llmg_1223	cation-transporting P-ATPase	mgtA	9	P	E	1.7866
llmg_1223	cation-transporting P-ATPase	mgtA	9	P	E
llmg_1224	transcriptional regulator	llmg_1224	0	K	T
llmg_1225	5-methyltetrahydropteroyltriglutamate--homocysteine methyltransferase	metE	0	E	A
llmg_1226	MetF protein	metF	0	E	E,V
llmg_1227	phospho-2-dehydro-3-deoxyheptonate aldolase	aroH	0	E	A	3.96834
llmg_1228	hypothetical protein	llmg_1228	0	0	-	3.99131
llmg_1229	hypothetical protein	llmg_1229	0	0	-	4.03445
llmg_1230	hypothetical protein	llmg_1230	3	0	-	2.69867
llmg_1235	cyclic nucleotide-binding domain protein	llmg_1235	0	T	-
llmg_1236	hypothetical protein	llmg_1236	5	S	-
llmg_1237	N5-carboxyethyl-ornithine synthase	ceo	0	E	A,E
llmg_1238	cold shock-like protein cspD2	cspD2	0	K	T
llmg_1240	hypothetical protein	llmg_1240	0	M	-
llmg_1241	hypothetical protein	llmg_1241	0	KG	-
llmg_1242	hypothetical protein	llmg_1242	0	KG	-
llmg_1243	hypothetical protein	llmg_1243	0	0	-
llmg_1243	hypothetical protein	llmg_1243	0	0	-
llmg_1244	hypothetical protein	llmg_1244	8	G	M
llmg_1245	hypothetical protein	llmg_1245	0	R	-
llmg_1247	arsenical resistance operon trans-acting repressor arsD	arsD	0	0	-
llmg_1248	arsenical pump-driving ATPase	arsA	0	P	M
llmg_1248	arsenical pump-driving ATPase	arsA	0	P	M
llmg_1249	hypothetical protein	llmg_1249	0	RP	-
llmg_1250	putative Arsenical-resistance protein	llmg_1250	10	P	M
llmg_1251	hypothetical protein	llmg_1251	0	0	-
llmg_1252	hypothetical protein	llmg_1252	0	K	-
llmg_1253	hypothetical protein	llmg_1253	0	R	-
llmg_1254	hypothetical protein	llmg_1254	0	0	-
llmg_1254	hypothetical protein	llmg_1254	0	0	-
llmg_1255	cold shock protein cspC	cspC	0	K	-
llmg_1256	cold shock protein cspD	cspD	0	K	-
llmg_1257	hypothetical protein	llmg_1257	3	S	-
llmg_1258	hypothetical protein	llmg_1258	2	0	-
llmg_1259	hypothetical protein	llmg_1259	2	S	-
llmg_1260	hypothetical protein	llmg_1260	0	S	-
llmg_1260	hypothetical protein	llmg_1260	0	S	-
llmg_1263	hypothetical protein	llmg_1263	0	S	-
llmg_1268	site-specific tyrosine recombinase XerS	xerS	0	L	-
llmg_1269	hypothetical protein	llmg_1269	0	0	-
llmg_1270	site-specific tyrosine recombinase XerS	xerS	0	L	-
llmg_1271	tRNA (uracil-5-)-methyltransferase Gid	gidC	0	J	D
llmg_1271	tRNA (uracil-5-)-methyltransferase Gid	gidC	0	J	D	-1.60567
llmg_1272	DNA topoisomerase I	topA	0	L	R	-1.5269
llmg_1273	Smf protein	smf	0	LU	R
llmg_1274	putative regulator AldR	aldR	0	J	U
llmg_1275	AldB protein	aldB	0	Q	C
llmg_1276	threonine dehydratase	ilvA	0	E	A
llmg_1277	ketol-acid reductoisomerase	ilvC	0	EH	A,V
llmg_1278	acetolactate synthase small subunit	ilvN	0	E	A,C,V
llmg_1279	acetolactate synthase catalytic subunit	ilvB	0	EH	A,C,V	2.81294
llmg_1280	dihydroxy-acid dehydratase	ilvD	0	EG	A,V
llmg_1281	putative ABC transporter ATP-binding protein	llmg_1281	0	P	M
llmg_1282	isopropylmalate isomerase small subunit	leuD	0	E	A
llmg_1283	hypothetical protein	llmg_1283	5	0	-
llmg_1284	isopropylmalate isomerase large subunit	leuC	0	E	A
llmg_1287	hypothetical protein	llmg_1287	0	R	-	-1.6485
llmg_1288	histidinol-phosphatase	hisK	0	ER	A
llmg_1288	histidinol-phosphatase	hisK	0	ER	A
llmg_1289	phosphoribosyl-AMP cyclohydrolase / phosphoribosyl-ATP pyrophosphohydrolase	hisI	0	E	A	1.57142
llmg_1290	imidazoleglycerol-phosphate synthase cyclase	hisF	0	E	A
llmg_1291	phosphoribosylformimino-5-aminoimidazole carboxamide ribotide isomerase	hisA	0	E	A	1.71132
llmg_1292	imidazole glycerol phosphate synthase subunit HisH	hisH	0	E	A
llmg_1293	hypothetical protein	llmg_1293	0	J	U
llmg_1294	HisB protein	hisB	0	E	A
llmg_1295	HisD protein	hisD	0	E	A
llmg_1296	HisG protein	hisG	0	E	A
llmg_1297	HisZ protein	hisZ	0	E	A
llmg_1298	histidinol-phosphate aminotransferase	hisC	0	E	A,B
llmg_1299	hypothetical protein	llmg_1299	5	S	-
llmg_1300	hypothetical protein	llmg_1300	1	S	-
llmg_1301	hypothetical protein	llmg_1301	0	SR	-
llmg_1302	hypothetical protein	llmg_1302	4	S	-
llmg_1303	hypothetical protein	llmg_1303	5	T	-
llmg_1304	putative exoribonuclease R	vacB2	0	K	-
llmg_1304	putative exoribonuclease R	vacB2	0	K	-
llmg_1305	putative transcriptional regulator	llmg_1305	0	K	-
llmg_1306	hypothetical protein	llmg_1306	2	0	-
llmg_1306	hypothetical protein	llmg_1306	2	0	-
llmg_1306	hypothetical protein	llmg_1306	2	0	-
llmg_1306	hypothetical protein	llmg_1306	2	0	-
llmg_1306	hypothetical protein	llmg_1306	2	0	-
llmg_1308	hypothetical protein	llmg_1308	0	0	-
llmg_1309	acetolactate synthase	als	0	EH	A,C,V	-1.86973
llmg_1310	hypothetical protein	llmg_1310	0	R	-
llmg_1311	hypothetical protein	llmg_1311	8	R	-
llmg_1313	hypothetical protein	llmg_1313	0	QR	-
llmg_1314	hypothetical protein	llmg_1314	0	R	-
llmg_1315	putative RNA methyltransferase	llmg_1315	0	J	A,L,X
llmg_1316	putative transcriptional regulator	llmg_1316	0	K	-
llmg_1317	N-acetylmannosamine-6-phosphate 2-epimerase	llmg_1317	0	G	C
llmg_1318	cation-transporting ATPase	llmg_1318	9	P	-
llmg_1320	putative xylan beta-1,4-xylosidase	llmg_1320	0	G	C
llmg_1320	putative xylan beta-1,4-xylosidase	llmg_1320	0	G	C
llmg_1320	putative xylan beta-1,4-xylosidase	llmg_1320	0	G	C
llmg_1321	hypothetical protein	llmg_1321	0	G	-
llmg_1322	hypothetical protein	llmg_1322	10	GEPR	-
llmg_1324	transcriptional regulator, araC family	llmg_1324	0	K	-
llmg_1325	Spermidine/putrescine ABC transporter substrate binding	potD	1	E	M	1.74343
llmg_1326	Spermidine/putrescine ABC transport permease protein potC	potC	6	E	M
llmg_1327	Spermidine/putrescine ABC transport system permease protein potB	potB	6	E	M
llmg_1327	Spermidine/putrescine ABC transport system permease protein potB	potB	6	E	M
llmg_1328	Spermidine/putrescine ABC transporter, ATP-binding protein	potA	0	E	M
llmg_1329	UDP-N-acetylenolpyruvoylglucosamine reductase	murB	0	M	C		-1.5941
llmg_1330	hypothetical protein	llmg_1330	5	0	-
llmg_1331	homoserine kinase	thrB	0	E	A
llmg_1332	homoserine dehydrogenase	hom	0	E	A	1.58464
llmg_1333	deoxynucleoside kinase	dukB	0	F	N
llmg_1334	FolC protein	folC	0	H	V
llmg_1334	FolC protein	folC	0	H	V	1.50264
llmg_1335	hypothetical protein	llmg_1335	0	LR	-	2.30403
llmg_1336	dihydropteroate synthase	folP	0	H	V	2.02558
llmg_1337	FolE protein	folE	0	H	V
llmg_1338	FolB protein	folB	0	H	V
llmg_1339	GTPase EngB	engB	0	R	-
llmg_1340	ATP-dependent protease ATP-binding subunit	clpX	0	O	F
llmg_1342	DfrA protein	dfrA	0	H	V
llmg_1343	putative rRNA methyltransferase	spoU	0	J	U
llmg_1344	hypothetical protein	llmg_1344	0	0	-
llmg_1344	hypothetical protein	llmg_1344	0	0	-
llmg_1344	hypothetical protein	llmg_1344	0	0	-
llmg_1345	Xanthine/uracil permease	pbuX	13	F	M
llmg_1345	Xanthine/uracil permease	pbuX	13	F	M
llmg_1346	xanthine phosphoribosyltransferase	xpt	0	F	N
llmg_1349	hypothetical protein	llmg_1349	8	S	-
llmg_1350	putative tellurium resistance protein	telC	0	T	-
llmg_1351	putative tellurium resistance protein	telB	0	T	-
llmg_1352	putative tellurium resistance protein	telA	0	T	-		4.6448
llmg_1353	putative tellurite resistance protein	llmg_1353	0	P	-	1.53209
llmg_1354	hypothetical protein	llmg_1354	0	0	-
llmg_1355	hypothetical protein	llmg_1355	0	0	-
llmg_1356	hypothetical protein	llmg_1356	0	0	-
llmg_1357	hypothetical protein	llmg_1357	0	0	-
llmg_1358	hypothetical protein	llmg_1358	0	G	-
llmg_1359	hypothetical protein	llmg_1359	0	K	-	-2.23341
llmg_1360	hypothetical protein	llmg_1360	0	S	-	-1.99344
llmg_1361	site-specific tyrosine recombinase XerS	xerS	0	L	-
llmg_1362	hypothetical protein	llmg_1362	0	U	-
llmg_1364	hypothetical protein	llmg_1364	0	0	-
llmg_1365	hypothetical protein	llmg_1365	3	0	-
llmg_1366	hypothetical protein	llmg_1366	0	0	-
llmg_1369	hypothetical protein	llmg_1369	0	0	-
llmg_1370
llmg_1371	maturase	matR	0	L	-	-2.37149
llmg_1371	maturase	matR	0	L	-	-1.66712
llmg_1372
llmg_1373	hypothetical protein	llmg_1373	0	EF	-
llmg_1374	LtrE protein	ltrE	0	L	R
llmg_1375	LtrD protein	ltrD	0	0	-
llmg_1376	LtrC protein	ltrC	0	RL	-
llmg_1377	hypothetical protein	llmg_1377	0	G	-
llmg_1378	hypothetical protein	llmg_1378	0	0	-
llmg_1379	Predicted Zn peptidase	llmg_1379	0	0	-
llmg_1379	Predicted Zn peptidase	llmg_1379	0	0	-
llmg_1381	hypothetical protein	llmg_1381	0	0	-
llmg_1381	hypothetical protein	llmg_1381	0	0	-
llmg_1381	hypothetical protein	llmg_1381	0	0	-
llmg_1382	hypothetical protein	llmg_1382	0	0	-
llmg_1382	hypothetical protein	llmg_1382	0	0	-
llmg_1383	conjugal transfer protein TraD	traD	2	U	-	-1.64372
llmg_1384	hypothetical protein	llmg_1384	0	0	-
llmg_1385	hypothetical protein	llmg_1385	0	0	-
llmg_1386	hypothetical protein	llmg_1386	0	0	-
llmg_1386	hypothetical protein	llmg_1386	0	0	-
llmg_1387	hypothetical protein	llmg_1387	0	0	-
llmg_1387	hypothetical protein	llmg_1387	0	0	-
llmg_1388	hypothetical protein	llmg_1388	1	0	-
llmg_1389	hypothetical protein	llmg_1389	0	0	-
llmg_1390	hypothetical protein	llmg_1390	1	R	-
llmg_1390	hypothetical protein	llmg_1390	1	R	-
llmg_1390	hypothetical protein	llmg_1390	1	R	-
llmg_1391	hypothetical protein	llmg_1391	0	U	-
llmg_1391	hypothetical protein	llmg_1391	0	U	-
llmg_1392	hypothetical protein	llmg_1392	2	0	-
llmg_1393	hypothetical protein	llmg_1393	5	0	-
llmg_1393	hypothetical protein	llmg_1393	5	0	-
llmg_1395	hypothetical protein	llmg_1395	0	0	-
llmg_1396	hypothetical protein	llmg_1396	1	0	-
llmg_1398	cell surface antigen I/II precursor	cluA	1	0	-
llmg_1399	hypothetical protein	llmg_1399	0	0	-
llmg_1399	hypothetical protein	llmg_1399	0	0	-
llmg_1400	hypothetical protein	llmg_1400	0	O	-
llmg_1402	hypothetical protein	llmg_1402	0	0	-
llmg_1403	hypothetical protein	llmg_1403	2	0	-
llmg_1406	hypothetical protein	llmg_1406	0	0	-
llmg_1407	hypothetical protein	llmg_1407	0	0	-
llmg_1408	hypothetical protein	llmg_1408	0	0	-
llmg_1409	hypothetical protein	llmg_1409	0	D	-
llmg_1410	hypothetical protein	llmg_1410	0	0	-
llmg_1411	hypothetical protein	llmg_1411	0	0	-
llmg_1412	guanosine 5'-monophosphate oxidoreductase	guaC	0	F	N	-4.04235
llmg_1413	hypothetical protein	llmg_1413	4	S	-
llmg_1414	Putative N-acetylglucosamine catabolic protein	nagD	0	G	X
llmg_1415	hypothetical protein	llmg_1415	0	I	L
llmg_1416	hypothetical protein	llmg_1416	0	F	F,N
llmg_1417	hypothetical protein	llmg_1417	1	M	-
llmg_1418	coproporphyrinogen III oxidase	hemN	0	H	V
llmg_1419	putative transcriptional regulator	llmg_1419	0	K	-
llmg_1420	hypothetical protein	llmg_1420	0	R	-
llmg_1421	hypothetical protein	llmg_1421	3	0	-
llmg_1422	penicillin acylase	pacA	0	M	L
llmg_1424	triosephosphate isomerase	tpiA	0	G	C,E
llmg_1425	transcriptional regulator, RpiR family	llmg_1425	0	K	-
llmg_1426	sucrose-specific PTS system IIBC component	llmg_1426	11	G	M,C
llmg_1427	N-acetylmuramic acid-6-phosphate etherase	murQ	0	R	C
llmg_1428	hypothetical protein	llmg_1428	0	S	-
llmg_1429	L-lactate dehydrogenase	ldhX	0	C	A,C	-1.63666
llmg_1430	bifunctional riboflavin kinase/FMN adenylyltransferase	ribC	0	H	V
llmg_1431	tRNA pseudouridine synthase B	truB	0	J	U
llmg_1432	putative secreted protein	llmg_1432	1	0	-
llmg_1433	putative secreted protein	llmg_1433	0	0	-
llmg_1434	putative secreted protein	llmg_1434	0	0	-
llmg_1435	putative secreted protein	llmg_1435	0	0	-
llmg_1440	hypothetical protein	llmg_1440	0	0	-
llmg_1441	fumarate reductase flavoprotein subunit	frdC	0	C	S,C,E,X
llmg_1442	PhnB-like protein	llmg_1442	0	S	-
llmg_1444	ADP-ribose pyrophosphatase	mutX	0	LR	R
llmg_1445	ATP-dependent DNA helicase	pcrA	0	L	R
llmg_1446	hypothetical protein	llmg_1446	7	0	-
llmg_1447	hypothetical protein	llmg_1447	6	0	-
llmg_1448	hypothetical protein	llmg_1448	5	JS	-
llmg_1449	Sortase SrtA	srtA	1	M	-
llmg_1450	thiamine biosynthesis lipoprotein apbE precursor	apbE	0	H	-
llmg_1451	DNA gyrase subunit A	gyrA	0	L	R
llmg_1452	putative amino-acid permease	llmg_1452	12	E	-
llmg_1453	Oxidoreductase	llmg_1453	0	MG	-
llmg_1454	putative sugar kinase	llmg_1454	0	KG	-
llmg_1455	6-phospho-beta-glucosidase	bglA2	0	G	C
llmg_1455	6-phospho-beta-glucosidase	bglA2	0	G	C
llmg_1456	beta-glucosidase	bglX	0	G	A,C
llmg_1457	Putative Di/Tri-peptide transport ATP-binding protein	llmg_1457	0	EP	M
llmg_1458	Putative Di/Tri-peptide transport system permease protein	llmg_1458	6	EP	M
llmg_1458	Putative Di/Tri-peptide transport system permease protein	llmg_1458	6	EP	M
llmg_1459	Putative Di/Tri-peptide transport system permease protein	llmg_1459	6	EP	M
llmg_1460	Putative Di/Tri-peptide transport ATP-binding protein	llmg_1460	0	E	M
llmg_1461	Putative Di/Tri-peptide binding protein precursor	llmg_1461	0	E	M
llmg_1461	Putative Di/Tri-peptide binding protein precursor	llmg_1461	0	E	M
llmg_1462	Putative HTH-type transcriptional regulator	llmg_1462	0	K	-
llmg_1463	GTP-binding protein LepA	lepA	0	M	-
llmg_1463	GTP-binding protein LepA	lepA	0	M	-
llmg_1464	AldC protein	aldC	0	Q	C	-1.6821
llmg_1465	putative UDP-N-acetylmuramyl tripeptide synthetase	murC2	0	M	A,G
llmg_1466	cobyric acid synthase	cobQ	0	R	-
llmg_1467	Putative ABC transporter permease protein	llmg_1467	8	V	M
llmg_1467	Putative ABC transporter permease protein	llmg_1467	8	V	M
llmg_1468	Putative ABC transporter ATP binding protein	llmg_1468	0	V	M
llmg_1470	NAD synthetase	nadE	0	H	E,V
llmg_1471	Putative acetyltransferase	llmg_1471	0	KR	-
llmg_1472	nicotinate phosphoribosyltransferase	pncB	0	H	V
llmg_1472	nicotinate phosphoribosyltransferase	pncB	0	H	V
llmg_1473	nicotinic acid mononucleotide adenyltransferase	nadD	0	H	V
llmg_1474	putative voltage gated chloride channel	llmg_1474	7	P	-
llmg_1475	hypothetical protein	llmg_1475	0	S	-
llmg_1477	glycyl-tRNA synthetase beta chain	glyS	0	J	U,A
llmg_1477	glycyl-tRNA synthetase beta chain	glyS	0	J	U,A
llmg_1478	glycyl-tRNA synthetase subunit alpha	glyQ	0	J	U,A		-1.62
llmg_1479	5'-nucleotidase	nucA	0	F	V,N
llmg_1480	hypothetical protein	llmg_1480	10	S	-
llmg_1481	putative teicoplanin resistance protein	vanZ	5	V	-
llmg_1482	hypothetical protein	llmg_1482	0	S	-
llmg_1483	Superfamily II DNA/RNA helicase required for DNA uptake	comFA	0	L	F
llmg_1483	Superfamily II DNA/RNA helicase required for DNA uptake	comFA	0	L	F
llmg_1484	putative late competence protein	comFC	0	R	F
llmg_1485	hypothetical protein	llmg_1485	0	S	-
llmg_1486	DgkA protein	dgkA	3	M	L
llmg_1487	hypothetical protein	llmg_1487	0	R	-
llmg_1488	putative hydrolase	llmg_1488	0	LR	-
llmg_1489	PhoH-like protein	phoH	0	T	-
llmg_1490	putative proton-dependent manganese transporter group C beta	mntH	12	P	M	-1.87757
llmg_1491	50S ribosomal protein L27	rpmA	0	J	U	-1.53594
llmg_1492	hypothetical protein	llmg_1492	0	J	-
llmg_1493	50S ribosomal protein L21	rplU	0	J	U
llmg_1494	Putative ABC transporter permease protein	llmg_1494	10	0	-
llmg_1495	hypothetical protein	llmg_1495	0	S	-
llmg_1495	hypothetical protein	llmg_1495	0	S	-
llmg_1496	putative phosphohydrolase	llmg_1496	0	R	-
llmg_1496	putative phosphohydrolase	llmg_1496	0	R	-
llmg_1497	putative hydrolase	llmg_1497	0	R	-
llmg_1498	hypothetical protein	llmg_1498	0	S	-	-1.54151
llmg_1499	hypothetical protein	llmg_1499	0	S	-
llmg_1500	putative methyltransferase	llmg_1500	0	R	-
llmg_1501	putative endonuclease III (DNA repair)	nth	0	L	R
llmg_1502	DNA replication protein dnaD	dnaD	0	L	R
llmg_1503	Surface protein	llmg_1503	0	0	-
llmg_1503	Surface protein	llmg_1503	0	0	-
llmg_1504	hypothetical protein	llmg_1504	0	0	-
llmg_1505	hypothetical protein	llmg_1505	4	0	-
llmg_1506	hypothetical protein	llmg_1506	2	0	-
llmg_1507	hypothetical protein	llmg_1507	0	RL	-
llmg_1508	dihydroorotase	pyrC	0	F	N	-1.55461
llmg_1509	orotate phosphoribosyltransferase	pyrE	0	F	N,X
llmg_1512	Putative ABC transporter ATP-binding protein	llmg_1512	0	R	U
llmg_1512	Putative ABC transporter ATP-binding protein	llmg_1512	0	R	U
llmg_1513	hypothetical protein	llmg_1513	0	P	-
llmg_1514	redox-sensing transcriptional repressor Rex	rex	0	R	-	-1.55246
llmg_1515	DNA repair protein radC homolog	radC	0	L	R
llmg_1516	D-fructose-6-phosphate amidotransferase	glmS	0	M	A,C
llmg_1517	putative phosphatidic acid phosphatase	llmg_1517	6	I	-
llmg_1518	sensor kinase protein	kinE	2	T	-
llmg_1519	hypothetical protein	llmg_1519	4	S	-
llmg_1520	two-component system regulator llrE	llrE	0	TK	-
llmg_1521	glycosyl transferase	llmg_1521	2	M	-
llmg_1522	hypothetical protein	llmg_1522	10	0	-
llmg_1522	hypothetical protein	llmg_1522	10	0	-
llmg_1522	hypothetical protein	llmg_1522	10	0	-
llmg_1523	hypothetical protein	llmg_1523	3	S	-
llmg_1524	ribosomal large subunit pseudouridine synthase D	rluD	0	J	U
llmg_1525	PA protein	pA	4	MU	F	-1.5243
llmg_1526	hypothetical protein	llmg_1526	0	0	-
llmg_1527	putative transcription regulator	llmg_1527	0	K	-
llmg_1528	hypothetical protein	llmg_1528	0	0	-
llmg_1529	riboflavin synthase, beta subunit	llmg_1529	0	H	V
llmg_1530	riboflavin biosynthesis protein ribA	ribA	0	H	V
llmg_1531	riboflavin synthase subunit alpha	ribB	0	H	V
llmg_1532	riboflavin biosynthesis protein RibD	ribD	0	H	V
llmg_1533	magnesium and cobalt transport protein	llmg_1533	2	P	-
llmg_1533	magnesium and cobalt transport protein	llmg_1533	2	P	-
llmg_1534	DNA topoisomerase IV subunit A	parC	0	L	R
llmg_1536	ElaA protein	elaA	0	R	-
llmg_1537	DNA polymerase III, epsilon chain	dnaQ	0	L	R,N
llmg_1538	putative isochorismatase	llmg_1538	0	Q	P
llmg_1538	putative isochorismatase	llmg_1538	0	Q	P
llmg_1539	DNA topoisomerase IV subunit B	parE	0	L	R
llmg_1539	DNA topoisomerase IV subunit B	parE	0	L	R
llmg_1540	hypothetical protein	llmg_1540	6	S	-
llmg_1540	hypothetical protein	llmg_1540	6	S	-
llmg_1541	Glutaredoxin-like protein nrdH	nrdH	0	O	F
llmg_1542	ribonucleotide reductase stimulatory protein	nrdI	0	F	-
llmg_1543	ribonucleotide-diphosphate reductase subunit alpha	nrdE	0	F	N
llmg_1543	ribonucleotide-diphosphate reductase subunit alpha	nrdE	0	F	N
llmg_1543	ribonucleotide-diphosphate reductase subunit alpha	nrdE	0	F	N
llmg_1544	ribonucleotide-diphosphate reductase subunit beta	nrdF	0	F	N
llmg_1545	cell division protein ftsX homolog	ftsX	4	D	M
llmg_1546	cell division ATP-binding protein	ftsE	0	D	M
llmg_1547	peptide chain release factor 2	prfB	0	J	U
llmg_1547	peptide chain release factor 2	prfB	0	J	U
llmg_1548	putative phosphohydrolase	llmg_1548	0	R	-
llmg_1549	hypothetical protein	llmg_1549	0	0	-
llmg_1550	hypothetical protein	llmg_1550	0	J	-
llmg_1551	putative formate dehydrogenase	fdhC	6	P	-	-2.37931
llmg_1552	putative ABC type transport system permease protein	llmg_1552	12	M	M	-1.7433
llmg_1553	Putative ABC transporter ATP-binding protein	llmg_1553	0	V	M	-1.9517
llmg_1554	transcriptional regulator, TetR family	llmg_1554	0	K	-	-2.13772
llmg_1555	hypothetical protein	llmg_1555	0	S	-
llmg_1556	hypothetical protein	llmg_1556	0	S	-
llmg_1557	hypothetical protein	llmg_1557	0	R	-
llmg_1558	cardiolipin synthetase	clsA	2	I	L
llmg_1559	FNR like protein A	flpA	0	T	T	1.75046
llmg_1560	stress induced DNA binding protein (putative)	llmg_1560	0	0	-
llmg_1561	heavy metal-(Cd/Co/Hg/Pb/Zn)-translocating P-type ATPase	llmg_1561	6	P	V
llmg_1561	heavy metal-(Cd/Co/Hg/Pb/Zn)-translocating P-type ATPase	llmg_1561	6	P	V
llmg_1562	hypothetical protein	llmg_1562	4	0	-
llmg_1563	hypothetical protein	llmg_1563	5	S	-
llmg_1563	hypothetical protein	llmg_1563	5	S	-
llmg_1566	hypothetical protein	llmg_1566	0	L	-
llmg_1568	PTS system, fructose specific IIBC components	fruA	10	GT	M,C
llmg_1569	Fructose 1-phosphate kinase	fruC	0	G	C
llmg_1570	transcriptional regulator of the fructose operon	fruR	0	KG	T
llmg_1571	aminoacylase/N-acyl-L-amino acid amidohydrolase/hippurate hydrolase	hipO2	0	R	A
llmg_1572	Myosin-crossreactive streptococcal antigen homologue	mycA	1	S	-
llmg_1573	hypothetical protein	llmg_1573	12	0	-
llmg_1574	chaperone protein dnaK	dnaK	0	O	M,F
llmg_1574	chaperone protein dnaK	dnaK	0	O	M,F
llmg_1575	GrpE protein	grpE	0	O	F
llmg_1576	heat-inducible transcription repressor	hrcA	0	K	T
llmg_1577	hypothetical protein	llmg_1577	4	0	-
llmg_1578	DacB protein	dacB	1	M	-
llmg_1579	phosphoglycerate mutase	gpmB	0	G	C
llmg_1580	hypothetical protein	llmg_1580	0	0	-
llmg_1581	hypothetical protein	llmg_1581	0	S	-
llmg_1582	hypothetical protein	llmg_1582	0	T	-
llmg_1583	putative prenyltransferase	llmg_1583	9	H	G
llmg_1584	endonuclease/exonuclease/phosphatase family protein	llmg_1584	1	0	-
llmg_1585	putative amidase	llmg_1585	0	Q	-
llmg_1586	putative exoribonuclease R	vacB1	0	K	-
llmg_1586	putative exoribonuclease R	vacB1	0	K	-
llmg_1587	preprotein translocase subunit SecG	secG	2	U	F
llmg_1588	TrxB1 protein	trxB1	0	O	N
llmg_1589	putative secreted protein	llmg_1589	2	0	-
llmg_1590	putative amino-acid ABC transporter ATP-binding protein	llmg_1590	0	E	M
llmg_1591	putative amino-acid ABC transporter permease protein	llmg_1591	6	E	M
llmg_1593	amino acid ABC transporter substrate binding protein	llmg_1593	0	ET	M
llmg_1594	Gamma-glutamyl-diamino acid-endopeptidase	llmg_1594	0	M	-
llmg_1595	formate--tetrahydrofolate ligase	fhs	0	F	C,V
llmg_1595	formate--tetrahydrofolate ligase	fhs	0	F	C,V
llmg_1596	hypothetical protein	llmg_1596	0	S	-
llmg_1597	hypothetical protein	llmg_1597	0	S	-
llmg_1598	putative secreted protein	llmg_1598	1	0	-
llmg_1599	DeoD protein	deoD	0	F	V,N
llmg_1600	hypothetical protein	llmg_1600	0	0	-
llmg_1601	phosphopentomutase	deoB	0	G	C,N
llmg_1602	putative transcriptional regulator	llmg_1602	0	K	-
llmg_1603	teichoic acid biosynthesis protein B	tagB	1	M	A
llmg_1604	teichoic acid biosynthesis protein F	tagF	0	M	A
llmg_1605	hypothetical protein	llmg_1605	0	0	-
llmg_1606	glycerol-3-phosphate cytidylyltransferase	tagD2	0	MI	L
llmg_1607	hypothetical protein	llmg_1607	0	L	-
llmg_1608	putative glycosyl hydrolases	llmg_1608	1	G	C
llmg_1609	putative secreted protein	llmg_1609	1	E	-
llmg_1612	putative transposase helper protein for IS712G	llmg_1612	0	L	-	-1.5339
llmg_1613	putative secreted protein	llmg_1613	2	0	-
llmg_1614	hypothetical protein	llmg_1614	0	0	-
llmg_1615	putative acetyltransferase	llmg_1615	0	R	-
llmg_1616	UDP-glucose 6-dehydrogenase	ugd	0	M	C
llmg_1617	hypothetical protein	llmg_1617	0	M	-
llmg_1618	hypothetical protein	llmg_1618	0	0	-
llmg_1619	hypothetical protein	llmg_1619	0	0	-
llmg_1620	hypothetical protein	llmg_1620	0	M	-
llmg_1621	hypothetical protein	llmg_1621	0	M	-
llmg_1622	teichoic acid ABC transporter permease protein	tagG	6	GM	M
llmg_1623	teichoic acid export ATP-binding protein tagH	tagH	1	GM	M
llmg_1624	exopolysaccharide biosynthesis protein	tagL	1	G	-
llmg_1625	hypothetical protein	llmg_1625	2	0	-
llmg_1627	transcriptional regulator, MarR family	rmaH	0	K	-
llmg_1628	putative secreted protein	llmg_1628	0	0	-
llmg_1629	putative methyltransferase	llmg_1629	0	QR	-
llmg_1630	hypothetical protein	llmg_1630	0	0	-
llmg_1631	DNA gyrase subunit B	gyrB	0	L	R
llmg_1631	DNA gyrase subunit B	gyrB	0	L	R
llmg_1632	putative hydrolase	llmg_1632	0	R	-
llmg_1633	hypothetical protein	llmg_1633	0	R	-
llmg_1634	hypothetical protein	llmg_1634	12	0	M
llmg_1634	hypothetical protein	llmg_1634	12	0	M
llmg_1635	putative ABC transporter ATP-binding protein	llmg_1635	0	V	M
llmg_1636	putative permease protein	llmg_1636	10	GER	-
llmg_1637	malate transporter	mleP	13	C	-
llmg_1638	malolactic enzyme	mleS	0	C	S,C
llmg_1638	malolactic enzyme	mleS	0	C	S,C
llmg_1639	ABC transporter ATP-binding protein	llmg_1639	0	R	-	-6.59373
llmg_1640	hypothetical protein	llmg_1640	0	0	-
llmg_1641	acetoin reductase	butA	0	IQR	C
llmg_1642	2,3-butanediol dehydrogenase	butB	0	ER	C	-2.00809
llmg_1643	rod shape-determining protein RodA	rodA	10	D	D
llmg_1644	hypothetical protein	llmg_1644	5	S	-
llmg_1645	general stress protein GSP13	llmg_1645	0	J	U
llmg_1646	peptidyl-prolyl cis-trans isomerase	ppiB	0	O	F
llmg_1647	putative hydrolase	llmg_1647	0	R	-
llmg_1648	two-component system regulator llrD	llrD	0	TK	-
llmg_1649	Sensor protein kinase kinD	kinD	2	T	-
llmg_1650	putative secreted protein	llmg_1650	3	S	-
llmg_1652	hypothetical protein	llmg_1652	0	R	-
llmg_1653	hypothetical protein	llmg_1653	0	R	-
llmg_1654	transposase for insertion sequence element IS981M	tnp981	0	L	-
llmg_1655	hypothetical protein	llmg_1655	0	L	-
llmg_1656	hypothetical protein	llmg_1656	0	0	-
llmg_1657	putative integrase/recombinase	xerD	0	L	-
llmg_1658	hypothetical protein	llmg_1658	0	R	-
llmg_1659	hypothetical protein	llmg_1659	6	S	-
llmg_1660	transcriptional regulator, TetR family	llmg_1660	0	K	-
llmg_1661	HU-like DNA-binding protein	hslB	0	L	-	-1.78945
llmg_1662	universal stress protein A	uspA	0	T	-	-1.77583
llmg_1663	hypothetical protein	llmg_1663	0	0	-	-2.14287
llmg_1664	nicotinamide mononucleotide transporter	pnuC2	8	H	M
llmg_1665	hypothetical protein	llmg_1665	2	0	-
llmg_1666	hypothetical protein	llmg_1666	6	S	-	-2.19335
llmg_1667	glycosyltransferase	llmg_1667	4	M	-
llmg_1668	hypothetical protein	llmg_1668	0	0	-
llmg_1669	putative acetyltransferase	llmg_1669	0	KR	-
llmg_1670	putative ketosteroid isomerase	llmg_1670	0	S	-
llmg_1671	50S ribosomal protein L19	rplS	0	J	U	-1.61291
llmg_1672	hypothetical protein	llmg_1672	0	S	-
llmg_1674	malolactic fermentation system transcriptional activator	mleR	0	K	-
llmg_1675	ABC transporter ATP-binding protein	llmg_1675	0	V	M
llmg_1676	ABC transporter permease protein	llmg_1676	4	V	M
llmg_1677	putative secreted protein	llmg_1677	1	0	-
llmg_1678	phospho-N-acetylmuramoyl-pentapeptide-transferase	mraY	10	M	G
llmg_1678	phospho-N-acetylmuramoyl-pentapeptide-transferase	mraY	10	M	G
llmg_1679	penicillin-binding protein	pbpX	1	M	-
llmg_1679	penicillin-binding protein	pbpX	1	M	-
llmg_1680	cell division protein	ftsL	1	D	-
llmg_1681	S-adenosyl-methyltransferase	mraW	0	M	-
llmg_1682	hypothetical protein	llmg_1682	7	S	-
llmg_1683	hypothetical protein	llmg_1683	4	S	-	1.78633
llmg_1684	hypothetical protein	llmg_1684	5	S	-
llmg_1685	DNA repair protein recN	recN	0	L	R
llmg_1685	DNA repair protein recN	recN	0	L	R
llmg_1686	arginine transcriptional regulator	ahrC	0	K	T
llmg_1687	hypothetical protein	llmg_1687	0	J	U
llmg_1688	putative acetyltransferase	llmg_1688	0	KR	-
llmg_1689	geranyltranstransferase	ispA	0	H	B,L
llmg_1691	exodeoxyribonuclease VII, small subunit	xseB	0	L	R
llmg_1691	exodeoxyribonuclease VII, small subunit	xseB	0	L	R
llmg_1692	exodeoxyribonuclease VII large subunit	xseA	0	L	R
llmg_1693	methylenetetrahydrofolate dehydrogenase (NADP+) / methenyltetrahydrofolate cyclohydrolase	folD	0	H	C,V
llmg_1694	copper-potassium transporting ATPase B	copB	8	P	E
llmg_1695	hypothetical protein	llmg_1695	1	0	-
llmg_1698	hypothetical protein	llmg_1698	1	0	-
llmg_1699	choline ABC transporter permease and substrate binding protein	choS	5	EM	M
llmg_1699	choline ABC transporter permease and substrate binding protein	choS	5	EM	M
llmg_1700	choline ABC transporter ATP binding protein	choQ	0	E	M	-1.64257
llmg_1702	glutathione reductase	gshR	0	C	A		-1.5779
llmg_1703	hypothetical protein	llmg_1703	0	P	-	-4.7851
llmg_1704	alanine racemase	alr	0	M	A
llmg_1705	holo-[acyl-carrier protein] synthase	acpS	0	I	V
llmg_1706	dipeptidase PepV	pepV	0	E	A
llmg_1707	putative glycosyltransferase	llmg_1707	0	0	-
llmg_1708	putative glycosyltransferase	llmg_1708	0	M	-
llmg_1708	putative glycosyltransferase	llmg_1708	0	M	-
llmg_1708	putative glycosyltransferase	llmg_1708	0	M	-
llmg_1709	maltose O-acetyltransferase	maa2	0	R	-
llmg_1710	putative glycosyltransferase	llmg_1710	0	M	-
llmg_1714	hypothetical protein	llmg_1714	0	L	-
llmg_1715	hypothetical protein	llmg_1715	0	L	-
llmg_1715	hypothetical protein	llmg_1715	0	L	-
llmg_1717	A/G-specific adenine glycosylase	mutY	0	L	R
llmg_1718	excinuclease ABC subunit C	uvrC	0	L	R
llmg_1718	excinuclease ABC subunit C	uvrC	0	L	R
llmg_1719	PnuC1 protein	pnuC1	8	H	M
llmg_1719	PnuC1 protein	pnuC1	8	H	M
llmg_1720	uridine phosphorylase	udp	0	F	N,X	1.52873
llmg_1723	putative secreted protein	llmg_1723	0	0	-
llmg_1723	putative secreted protein	llmg_1723	0	0	-
llmg_1723	putative secreted protein	llmg_1723	0	0	-
llmg_1724	30S ribosomal protein S1	rpsA	0	J	U
llmg_1725	tRNA (5-methylaminomethyl-2-thiouridylate)-methyltransferase	trmU	0	J	U
llmg_1726	putative galactose-1-phosphate uridylyltransferase	llmg_1726	0	C	C
llmg_1727	ABC transporter permease protein	llmg_1727	14	S	-
llmg_1728	putative secreted protein	llmg_1728	1	0	-
llmg_1729	copper/potassium-transporting ATPase	copA	8	P	E
llmg_1730	mercuric reductase	merP	0	P	-
llmg_1731	transcriptional regulator	copR	0	K	-
llmg_1732	L-serine dehydratase alpha subunit	sdaA	0	E	A
llmg_1733	L-serine dehydratase beta subunit	sdaB	0	E	A
llmg_1734	NADH dehydrogenase	noxB	2	C	E
llmg_1734	NADH dehydrogenase	noxB	2	C	E
llmg_1735	NADH dehydrogenase	noxA	0	C	E
llmg_1736	hypothetical protein	llmg_1736	0	0	-
llmg_1737	non-heme chloride peroxidase	cpo	0	R	-
llmg_1738	beta-glucosidase	llmg_1738	0	G	A,C
llmg_1740	HTH-type transcriptional regulator	llmg_1740	0	K	-
llmg_1741	leucyl-tRNA synthetase	leuS	0	J	U,A
llmg_1741	leucyl-tRNA synthetase	leuS	0	J	U,A
llmg_1742	putative regulator	llmg_1742	0	TQ	-
llmg_1743	ribose-phosphate pyrophosphokinase	prsA	0	FE	C,N
llmg_1744	signal recognition particle-docking protein	ftsY	0	U	F
llmg_1744	signal recognition particle-docking protein	ftsY	0	U	F
llmg_1745	hypothetical protein	llmg_1745	6	0	-
llmg_1746	putative hydrolase	llmg_1746	0	R	-
llmg_1747	amino acid permease	llmg_1747	9	E	M
llmg_1748	hypothetical protein	llmg_1748	6	S	-
llmg_1749	hypothetical protein	llmg_1749	8	S	-
llmg_1750	hypothetical protein	llmg_1750	2	0	-	1.51789
llmg_1751	alkaline phosphatase superfamily protein	llmg_1751	5	M	-	2.11631
llmg_1752	chromosome segregation protein smc	smc	0	D	D	1.5472
llmg_1753	ribonuclease III	rnc	0	K	U
llmg_1754	ArgF protein	argF	0	E	A
llmg_1755	ArgB protein	argB	0	E	A
llmg_1756	acetylornithine aminotransferase	argD	0	E	A
llmg_1757	bifunctional ornithine acetyltransferase/N-acetylglutamate synthase protein	argJ	0	E	A
llmg_1758	N-acetyl-gamma-glutamyl-phosphate reductase	argC	0	E	A
llmg_1759	Putative NADH-flavin reductase	llmg_1759	0	R	-
llmg_1760	hypothetical protein	llmg_1760	5	S	-
llmg_1761	hypothetical protein	llmg_1761	0	0	-
llmg_1762	3-ketoacyl-(acyl-carrier-protein) reductase	fabG	1	IQR	L
llmg_1763	hypothetical protein	llmg_1763	0	0	-
llmg_1764	MetS protein	metS	0	RJ	U,A
llmg_1765	3'-exo-deoxyribonuclease	exoA	0	L	R
llmg_1766	putative acetyltransferase	llmg_1766	0	J	-
llmg_1767	transcriptional regulator, DeoR family	rdrA	0	KG	-
llmg_1768	hypothetical protein	llmg_1768	0	P	-
llmg_1769	hypothetical protein	llmg_1769	0	S	-
llmg_1770	NADH oxidase	noxC	0	RP	-
llmg_1771	putative rhodanese-related sulfurtransferase	llmg_1771	0	P	-
llmg_1772	putative rhodanese-related sulfurtransferase	llmg_1772	0	P	-
llmg_1773	hypothetical protein	llmg_1773	0	S	-
llmg_1775	O-acetylserine sulfhydrylase	cysK	0	E	A,E
llmg_1776	cystathionine gamma-synthase/cystathionine beta-lyase	metC	0	E	A,E	-1.96675
llmg_1777	AccA protein	accA	0	I	B,C,L	1.53518
llmg_1778	acetyl-CoA carboxylase subunit beta	accD	0	I	B,C,L
llmg_1779	acetyl-CoA carboxylase biotin carboxylase subunit	accC	0	I	B,C,L
llmg_1781	(3R)-hydroxymyristoyl-(acyl carrier protein) dehydratase	fabZ	0	I	L	1.93076
llmg_1782	acetyl-CoA carboxylase biotin carboxyl carrier protein subunit	accB	0	I	B,C,L	1.59189
llmg_1783	3-oxoacyl-[acyl-carrier-protein] synthase II	fabF	0	IQ	L
llmg_1784	3-ketoacyl-(acyl-carrier-protein) reductase	fabG	0	IQR	L	1.6179
llmg_1785	malonyl CoA-acyl carrier protein transacylase	fabD	0	I	L
llmg_1786	acyl carrier protein	acpP	0	IQ	-
llmg_1787	3-oxoacyl-(acyl carrier protein) synthase III	fabH	0	I	L
llmg_1788	transcriptional regulator, MarR family	rmaG	0	K	T
llmg_1789	mannose-6-phosphate isomerase	pmi	0	G	C
llmg_1791	Ribosome-binding factor A	rbfA	0	J	U
llmg_1792	translation initiation factor IF-2	infB	0	J	U
llmg_1793	hypothetical protein	llmg_1793	0	J	-
llmg_1794	hypothetical protein	llmg_1794	0	K	-
llmg_1796	transcription elongation factor NusA	nusA	0	K	T
llmg_1797	hypothetical protein	llmg_1797	0	S	-	-1.58069
llmg_1798	LrgA family protein	lrgA	4	R	-
llmg_1799	LrgB family protein	lrgB	6	M	-
llmg_1800	putative secreted protein	llmg_1800	1	0	-
llmg_1801	Sortase SrtC	srtC	2	M	-
llmg_1802	hypothetical protein	llmg_1802	1	0	-
llmg_1803	putative secreted protein	llmg_1803	2	0	-
llmg_1803	putative secreted protein	llmg_1803	2	0	-
llmg_1804	transcriptional regulator, rgg family	llmg_1804	0	K	-
llmg_1805	GTP-binding protein EngA	engA	0	R	-
llmg_1805	GTP-binding protein EngA	engA	0	R	-
llmg_1806	hypothetical protein	llmg_1806	0	S	-
llmg_1807	nitroreductase family protein	llmg_1807	0	C	-	-1.55184
llmg_1808	primosomal protein DnaI	dnaI	0	L	R
llmg_1809	chromosome replication initiation / membrane attachment protein	dnaB	1	L	R
llmg_1810	hypothetical protein	llmg_1810	0	K	T
llmg_1811	tRNA (guanine-N(7))-methyltransferase	trmB	0	R	-
llmg_1812	putative kinase	llmg_1812	0	M	-
llmg_1813	hypothetical protein	llmg_1813	0	S	-
llmg_1813	hypothetical protein	llmg_1813	0	S	-
llmg_1814	DnaC protein	dnaC	0	L	R
llmg_1815	50S ribosomal protein L9	rplI	0	J	U
llmg_1816	RecJ-like protein	llmg_1816	2	T	-
llmg_1817	putative beta-phosphoglucomutase	llmg_1817	0	R	-		-1.9001
llmg_1818	transcriptional regulator, MarR family	rmaA	0	K	-
llmg_1819	hypothetical protein	llmg_1819	0	R	-
llmg_1820	aspartate kinase	thrA	0	E	A
llmg_1821	hypothetical protein	llmg_1821	0	0	-
llmg_1822	hypothetical protein	llmg_1822	0	RS	-
llmg_1822	hypothetical protein	llmg_1822	0	RS	-
llmg_1823	L-asparaginase	ansB	0	EJ	A,E	-1.7845
llmg_1825	hypothetical protein	llmg_1825	0	R	-
llmg_1826	hypothetical protein	llmg_1826	0	K	-
llmg_1827	putative acetyltransferase	llmg_1827	0	J	U
llmg_1828	menaquinone-specific isochorismate synthase	menF	0	HQ	P,V
llmg_1828	menaquinone-specific isochorismate synthase	menF	0	HQ	P,V
llmg_1829	2-oxoglutarate decarboxylase / 2-succinyl-6-hydroxy-2,4-cyclohexadiene-1-carboxylate synthase	menD	0	H	V
llmg_1829	2-oxoglutarate decarboxylase / 2-succinyl-6-hydroxy-2,4-cyclohexadiene-1-carboxylate synthase	menD	0	H	V
llmg_1830	menaquinone biosynthesis related protein	menX	0	R	V	-1.63787
llmg_1831	naphthoate synthase	menB	0	H	V	-1.55833
llmg_1832	O-succinylbenzoic acid--CoA ligase	menE	0	IQ	V
llmg_1833	o-succinylbenzoate synthase	menC	0	MR	V
llmg_1834	hypothetical protein	llmg_1834	0	Q	-	1.79613
llmg_1835	transcriptional regulator, LacI family	rliC	0	K	-
llmg_1835	transcriptional regulator, LacI family	rliC	0	K	-
llmg_1836	alpha-xylosidase	xylS	0	G	C
llmg_1836	alpha-xylosidase	xylS	0	G	C
llmg_1837	hypothetical protein	llmg_1837	5	0	-
llmg_1838	putative sugar ABC transporter substrate-binding protein	llmg_1838	1	G	M
llmg_1838	putative sugar ABC transporter substrate-binding protein	llmg_1838	1	G	M
llmg_1839	putative sugar ABC transporter permease	llmg_1839	4	G	M
llmg_1843	hypothetical protein	llmg_1843	0	FJ	-
llmg_1844	hypothetical protein	llmg_1844	1	T	-
llmg_1845	metal-dependent hydrolase	llmg_1845	0	R	-
llmg_1845	metal-dependent hydrolase	llmg_1845	0	R	-
llmg_1846	cold shock-like protein cspB	cspB	0	K	T
llmg_1847	cold shock-like protein cspA	cspA	0	K	-
llmg_1848	hypothetical protein	llmg_1848	0	0	-
llmg_1849	hypothetical protein	metE2	0	E	A
llmg_1850	quinone oxidoreductase	qor	0	CR	-
llmg_1851	hypothetical protein	llmg_1851	6	S	-
llmg_1852	hypothetical protein	llmg_1852	0	R	-
llmg_1853	ABC transporter ATP-binding and permease protein	llmg_1853	4	V	M
llmg_1854	alkaline phosphatase	apl	4	S	S,V,X
llmg_1855	hypothetical protein	llmg_1855	3	0	-
llmg_1856	multidrug resistance ABC transporter ATP-binding and permease protein	lmrA	5	V	M
llmg_1857	putative esterase	llmg_1857	0	E	-
llmg_1857	putative esterase	llmg_1857	0	E	-
llmg_1857	putative esterase	llmg_1857	0	E	-
llmg_1859	putative flavodoxin	llmg_1859	0	CH	-	1.6787
llmg_1860	transcriptional regulator, MarR family	rmaB	0	K	-
llmg_1861	cytochrome D ABC transporter ATP binding and permease protein	cydD	5	CO	M
llmg_1862	cytochrome D ABC transporter ATP binding and permease protein	cydC	6	CO	M
llmg_1863	cytochrome d ubiquinol oxidase, subunit II	cydB	8	C	E
llmg_1863	cytochrome d ubiquinol oxidase, subunit II	cydB	8	C	E
llmg_1864	cytochrome bd-I ubiquinol oxidase subunit I	cydA	9	C	E
llmg_1864	cytochrome bd-I ubiquinol oxidase subunit I	cydA	9	C	E
llmg_1865	di-/tripeptide transporter	dtpT	13	E	M
llmg_1866	hypothetical protein	llmg_1866	3	0	-
llmg_1867	hypothetical protein	llmg_1867	0	0	-
llmg_1868	HTH-type transcriptional regulator	llmg_1868	0	K	-
llmg_1869	amylopullulanase	apu	0	G	C
llmg_1871	glycogen phosphorylase	glgP	0	G	C
llmg_1871	glycogen phosphorylase	glgP	0	G	C
llmg_1871	glycogen phosphorylase	glgP	0	G	C
llmg_1872	glycogen synthase	glgA	0	G	C
llmg_1873	glucose-1-phosphate adenylyltransferase	glgD	0	G	C
llmg_1873	glucose-1-phosphate adenylyltransferase	glgD	0	G	C
llmg_1874	glucose-1-phosphate adenylyltransferase	glgC	0	G	C
llmg_1875
llmg_1877
llmg_1878	transcription termination protein nusB	nusB	0	K	T
llmg_1879	hypothetical protein	llmg_1879	0	S	-
llmg_1880	elongation factor P	efp	0	J	U
llmg_1881	aminopeptidase P	pepP	0	E	-
llmg_1882	dimethyladenosine transferase	ksgA	0	J	U
llmg_1883	hypothetical protein	llmg_1883	0	L	R
llmg_1884	DNA topology modulation protein FlaR, putative	flaR	0	F	-
llmg_1885	putative deoxyribonuclease	tatD	0	L	F
llmg_1886	IntTn5276 protein	intTn5276	0	L	-
llmg_1886	IntTn5276 protein	intTn5276	0	L	-
llmg_1887	putative Tn5276 excisionase	xisTn5276	0	0	-
llmg_1888	ArdA protein	ardA	0	R	-
llmg_1888	ArdA protein	ardA	0	R	-
llmg_1889	hypothetical protein	llmg_1889	0	0	-
llmg_1890	cell wall binding domain protein, truncated	isp2	0	R	-
llmg_1893	transposase for insertion sequence IS904H	tnp904	0	L	-
llmg_1894	phosphoglycerate mutase family protein	llmg_1894	0	G	C
llmg_1895	phosphate transport system regulator phoU	phoU	0	P	-
llmg_1896	phosphate ABC transporter ATP-binding protein	pstA	0	P	M
llmg_1897	phosphate ABC transporter ATP-binding protein	pstB	0	P	M
llmg_1898	phosphate transport system permease protein pstC	pstC	6	P	M
llmg_1899	phosphate transport system permease protein pstD	pstD	6	P	M
llmg_1900	phosphate transport substrate binding protein pstE	pstE	0	P	M,S
llmg_1900	phosphate transport substrate binding protein pstE	pstE	0	P	M,S
llmg_1901	phosphate transport substrate binding protein pstF	pstF	0	P	M,S
llmg_1902	SsrA-binding protein	smpB	0	O	F
llmg_1903	putative transcriptional regulator	llmg_1903	0	K	-
llmg_1904	putative nitroreductase	llmg_1904	0	C	-
llmg_1905	putative esterase	llmg_1905	0	E	-
llmg_1906	alanyl-tRNA synthetase	alaS	0	J	U,A
llmg_1906	alanyl-tRNA synthetase	alaS	0	J	U,A
llmg_1907	Foldase protein prsA precursor	pmpA	0	O	F
llmg_1908	putative methyltransferase	llmg_1908	0	R	A,L,X
llmg_1909	PepF protein	pepF	0	E	-
llmg_1909	PepF protein	pepF	0	E	-
llmg_1909	PepF protein	pepF	0	E	-
llmg_1909	PepF protein	pepF	0	E	-
llmg_1911	hypothetical protein	llmg_1911	6	S	-
llmg_1912	hypothetical protein	llmg_1912	3	R	-	-2.71064
llmg_1913	Xanthine/uracil/vitamin C permease	pbuO	13	R	M	-1.95794
llmg_1913	Xanthine/uracil/vitamin C permease	pbuO	13	R	M	-2.11991
llmg_1914	hypothetical protein	llmg_1914	0	R	-
llmg_1915	putative Fe-S oxidoreductase	llmg_1915	0	C	-
llmg_1916	putative electron transport protein	llmg_1916	0	C	-
llmg_1917	hypothetical protein	llmg_1917	0	S	-
llmg_1918	hypothetical protein	llmg_1918	7	R	-
llmg_1919	hypothetical protein	llmg_1919	0	IR	-
llmg_1920	hypothetical protein	llmg_1920	0	R	-	-2.26511
llmg_1921	30S ribosomal protein S20	rpsT	0	J	U
llmg_1922	exodeoxyribonuclease V alpha chain	recD	0	L	R
llmg_1922	exodeoxyribonuclease V alpha chain	recD	0	L	R
llmg_1923	phosphoglycerate mutase	gpmC	0	G	C
llmg_1924	prephenate dehydratase	pheA	0	E	A
llmg_1925	AroK protein	aroK	0	E	A
llmg_1926	3-phosphoshikimate 1-carboxyvinyltransferase	aroA	0	E	A
llmg_1927	prephenate dehydrogenase	tyrA	0	E	A,B
llmg_1928	sensor histidine kinase	kinG	2	T	-
llmg_1929	response regulator	llrG	0	TK	-
llmg_1930	hypothetical protein	llmg_1930	9	V	-
llmg_1932	Sulfate/thiosulfate import ATP-binding protein cysA	llmg_1932	0	V	M
llmg_1933	hypothetical protein	llmg_1933	1	S	-
[truncated: 762 more rows]

## Sheet: 2. SP_ OpuAC vs 8048
Spot ID number: the number corresponds to number assaigned to the protein spot in 2D gels by the Decyder software.
Spot ID	Significance	Avg ratio (OpuAC/8048)	Protein name	Protein accession numbers	Protein molecular weight (Da)	Protein identification probability	Number of unique peptides	Number of unique spectra	Number of total spectra	Percentage of total spectra	Percentage sequence coverage	Peptide sequence	Previous amino acid	Next amino acid	Best Peptide identification probability	Best Mascot Ion score	Best Mascot Identity score	Number of identified +1H spectra	Number of identified +2H spectra	Number of identified +3H spectra	Number of identified +4H spectra	Number of enzymatic termini	Calculated +1H Peptide Mass (AMU)	Peptide start index	Peptide stop index	Assigned	Other Proteins
220	2.813e-05	-1.5543	glyA "serine hydroxymethyltransferase"	llmg_0563	44805.9	1	18	21	28	0.124	0.566	ALVNHDNQEK	K	L	0.95	33	15.3	0	1	0	0	2	1167.58	389	398	TRUE
			glyA "serine hydroxymethyltransferase"	llmg_0563	44805.9	1	18	21	28	0.124	0.566	ALVNHDNQEKLEEVR	K	K	0.95	34.8	14	0	0	1	0	2	1793.91	389	403	TRUE
			glyA "serine hydroxymethyltransferase"	llmg_0563	44805.9	1	18	21	28	0.124	0.566	AVMAAQGSVLTNK	K	Y	0.95	63.6	16.8	0	3	0	0	2	1305.68	42	54	TRUE
			glyA "serine hydroxymethyltransferase"	llmg_0563	44805.9	1	18	21	28	0.124	0.566	EAIPDETLSPFK	K	T	0.95	26.3	17	0	1	0	0	2	1346.68	347	358	TRUE
			glyA "serine hydroxymethyltransferase"	llmg_0563	44805.9	1	18	21	28	0.124	0.566	EALDPEFATYIEQVIK	K	N	0.95	71.4	15.7	0	1	0	0	2	1865.95	277	292	TRUE
			glyA "serine hydroxymethyltransferase"	llmg_0563	44805.9	1	18	21	28	0.124	0.566	EAQDLLDSVHITLNK	K	E	0.95	77.9	16.1	0	1	0	0	2	1695.89	332	346	TRUE
			glyA "serine hydroxymethyltransferase"	llmg_0563	44805.9	1	18	21	28	0.124	0.566	GGMILTNDEVLAK	R	K	0.95	44.1	17.9	0	2	0	0	2	1376.71	237	249	TRUE
			glyA "serine hydroxymethyltransferase"	llmg_0563	44805.9	1	18	21	28	0.124	0.566	IGAAAITSR	R	G	0.95	52.8	19.4	0	1	0	0	2	859.5	364	372	TRUE
			glyA "serine hydroxymethyltransferase"	llmg_0563	44805.9	1	18	21	28	0.124	0.566	INSAIFPGTQGGPLEHVIAAK	K	A	0.95	40.7	14.6	0	1	0	0	2	2120.15	251	271	TRUE
			glyA "serine hydroxymethyltransferase"	llmg_0563	44805.9	1	18	21	28	0.124	0.566	KINSAIFPGTQGGPLEHVIAAK	K	A	0.95	57.7	12.6	0	0	1	0	2	2248.25	250	271	TRUE
			glyA "serine hydroxymethyltransferase"	llmg_0563	44805.9	1	18	21	28	0.124	0.566	KVAQLVSK	R	A	0.95	34.7	12	0	1	0	0	2	872.557	381	388	TRUE
			glyA "serine hydroxymethyltransferase"	llmg_0563	44805.9	1	18	21	28	0.124	0.566	LIAGGSDNHLLNLK	R	V	0.95	58.7	14.5	0	1	0	0	2	1464.82	309	322	TRUE
			glyA "serine hydroxymethyltransferase"	llmg_0563	44805.9	1	18	21	28	0.124	0.566	LIVAGASAYSR	K	L	0.95	67	14.6	0	2	0	0	2	1107.62	170	180	TRUE
			glyA "serine hydroxymethyltransferase"	llmg_0563	44805.9	1	18	21	28	0.124	0.566	LMVDMAHIAGLVATGAHPNPLPYADVVTTTTHK	K	T	0.95	48.6	13.6	0	0	0	2	2	3473.76	198	230	TRUE
			glyA "serine hydroxymethyltransferase"	llmg_0563	44805.9	1	18	21	28	0.124	0.566	NTQAMADEFAK	K	V	0.95	32.5	9.03	0	2	0	0	2	1241.55	293	303	TRUE
			glyA "serine hydroxymethyltransferase"	llmg_0563	44805.9	1	18	21	28	0.124	0.566	QQQNIELIASENIVSK	R	A	0.95	60.6	13.6	0	1	1	0	2	1813.97	26	41	TRUE
			glyA "serine hydroxymethyltransferase"	llmg_0563	44805.9	1	18	21	28	0.124	0.566	VLDLGINGK	K	E	0.95	42.6	15.8	0	1	0	0	2	928.547	323	331	TRUE
			glyA "serine hydroxymethyltransferase"	llmg_0563	44805.9	1	18	21	28	0.124	0.566	YYGGTEAVDVVENLAIDR	R	A	0.95	116	16.4	0	2	1	0	2	1983.97	64	81	TRUE
			thiI "thiamine biosynthesis protein thiI"	llmg_0395	45206.4	1	13	13	16	0.0711	0.342	APQAYLMTITR	K	R	0.95	46.4	17.2	0	2	0	0	2	1264.67	257	267	TRUE
			thiI "thiamine biosynthesis protein thiI"	llmg_0395	45206.4	1	13	13	16	0.0711	0.342	EIYSEGQTFK	K	I	0.95	31.6	13.2	0	1	0	0	2	1201.57	100	109	TRUE
			thiI "thiamine biosynthesis protein thiI"	llmg_0395	45206.4	1	13	13	16	0.0711	0.342	EVLADMPELK	R	I	0.95	26	16.6	0	1	0	0	2	1160.59	35	44	TRUE
			thiI "thiamine biosynthesis protein thiI"	llmg_0395	45206.4	1	13	13	16	0.0711	0.342	GAGGMPVGTAGR	K	G	0.95	65.1	12.3	0	2	0	0	2	1046.51	170	181	TRUE
			thiI "thiamine biosynthesis protein thiI"	llmg_0395	45206.4	1	13	13	16	0.0711	0.342	GHLMLSGGIDSPVAGYLALK	R	R	0.95	49.8	14.8	0	0	1	0	2	2015.06	182	201	TRUE
			thiI "thiamine biosynthesis protein thiI"	llmg_0395	45206.4	1	13	13	16	0.0711	0.342	GHLMLSGGIDSPVAGYLALKR	R	G	0.95	33.7	14	0	0	1	0	2	2171.16	182	202	TRUE
			thiI "thiamine biosynthesis protein thiI"	llmg_0395	45206.4	1	13	13	16	0.0711	0.342	GVEIEAVHFASPPYTSPGALKK	R	A	0.95	32.4	16	0	0	1	0	2	2298.21	203	224	TRUE
			thiI "thiamine biosynthesis protein thiI"	llmg_0395	45206.4	1	13	13	16	0.0711	0.342	MDVEGMVDR	R	A	0.95	40	4.77	0	1	0	0	2	1083.45	371	379	TRUE
			thiI "thiamine biosynthesis protein thiI"	llmg_0395	45206.4	1	13	13	16	0.0711	0.342	NEIIEIAEK	K	I	0.95	35.2	16.9	0	1	0	0	2	1058.57	324	332	TRUE
			thiI "thiamine biosynthesis protein thiI"	llmg_0395	45206.4	1	13	13	16	0.0711	0.342	QDATYLSFEDIK	R	G	0.95	37.5	14.6	0	1	0	0	2	1429.69	158	169	TRUE
			thiI "thiamine biosynthesis protein thiI"	llmg_0395	45206.4	1	13	13	16	0.0711	0.342	RMDVEGMVDR	K	A	0.947	27.6	10.8	0	0	1	0	2	1239.55	370	379	TRUE
			thiI "thiamine biosynthesis protein thiI"	llmg_0395	45206.4	1	13	13	16	0.0711	0.342	TVLYDEIMVR	M	Y	0.95	39.5	14.9	0	2	0	0	2	1254.64	2	11	TRUE
			thiI "thiamine biosynthesis protein thiI"	llmg_0395	45206.4	1	13	13	16	0.0711	0.342	VFGIQNFSPSIK	K	V	0.95	45	17.4	0	1	0	0	2	1336.73	71	82	TRUE
			purA "adenylosuccinate synthetase"	llmg_2201	47335	1	12	14	14	0.0622	0.333	IADLLDKEIFEER	R	L	0.95	41.8	15.8	0	1	1	0	2	1590.84	147	159	TRUE
			purA "adenylosuccinate synthetase"	llmg_2201	47335	1	12	14	14	0.0622	0.333	ISTFSVGPGR	R	E	0.95	39.8	18.3	0	1	0	0	2	1020.55	409	418	TRUE
			purA "adenylosuccinate synthetase"	llmg_2201	47335	1	12	14	14	0.0622	0.333	ISVIGNGVVVNPK	K	S	0.95	53.8	6.99	0	1	0	0	2	1295.77	65	77	TRUE
			purA "adenylosuccinate synthetase"	llmg_2201	47335	1	12	14	14	0.0622	0.333	KLDFLQEEAK	K	G	0.95	26.1	16.1	0	1	0	0	2	1220.65	111	120	TRUE
			purA "adenylosuccinate synthetase"	llmg_2201	47335	1	12	14	14	0.0622	0.333	PSVVVVGTQWGDEGK	M	G	0.95	44.3	16.6	0	1	0	0	2	1557.79	2	16	TRUE
			purA "adenylosuccinate synthetase"	llmg_2201	47335	1	12	14	14	0.0622	0.333	RVGELVGVR	R	I	0.95	42.7	13	0	1	0	0	2	984.596	400	408	TRUE
			purA "adenylosuccinate synthetase"	llmg_2201	47335	1	12	14	14	0.0622	0.333	SNGEQITHYPASLK	R	E	0.95	34.6	16.3	0	1	0	0	2	1544.77	349	362	TRUE
			purA "adenylosuccinate synthetase"	llmg_2201	47335	1	12	14	14	0.0622	0.333	VGDGPFPTELFDEVGHQIR	R	E	0.95	47.6	14.1	0	0	1	0	2	2113.04	272	290	TRUE
			purA "adenylosuccinate synthetase"	llmg_2201	47335	1	12	14	14	0.0622	0.333	VGELVGVR	R	I	0.95	51.7	15.3	0	1	0	0	2	828.494	401	408	TRUE
			purA "adenylosuccinate synthetase"	llmg_2201	47335	1	12	14	14	0.0622	0.333	VSGLTNLSLNSIDVLSGLETVK	R	I	0.95	94.4	11.8	0	1	1	0	2	2259.24	320	341	TRUE
			purA "adenylosuccinate synthetase"	llmg_2201	47335	1	12	14	14	0.0622	0.333	YVTDTSVILNDALDAGK	K	R	0.95	67.3	15.2	0	1	0	0	2	1794.91	199	215	TRUE
			purA "adenylosuccinate synthetase"	llmg_2201	47335	1	12	14	14	0.0622	0.333	YVTDTSVILNDALDAGKR	K	V	0.95	41.6	16.3	0	1	0	0	2	1951.01	199	216	TRUE
			glmU "glucosamine-1-phosphate N-acetyltransferase / UDP-N-acetylglucosamine pyrophosphorylase"	llmg_2076	49104	1	4	4	4	0.0178	0.114	ATATILTAIAPNPTGYGR	K	I	0.95	37.9	16.5	0	1	0	0	2	1787.97	123	140	TRUE
			glmU "glucosamine-1-phosphate N-acetyltransferase / UDP-N-acetylglucosamine pyrophosphorylase"	llmg_2076	49104	1	4	4	4	0.0178	0.114	NVVIVGHEADR	K	V	0.95	36.4	16	0	1	0	0	2	1208.64	48	58	TRUE
			glmU "glucosamine-1-phosphate N-acetyltransferase / UDP-N-acetylglucosamine pyrophosphorylase"	llmg_2076	49104	1	4	4	4	0.0178	0.114	SITEINTGTYIFDNK	K	S	0.95	59.8	15.8	0	1	0	0	2	1715.85	164	178	TRUE
			glmU "glucosamine-1-phosphate N-acetyltransferase / UDP-N-acetylglucosamine pyrophosphorylase"	llmg_2076	49104	1	4	4	4	0.0178	0.114	VLHQVAGK	K	S	0.95	44.8	8.45	0	1	0	0	2	851.51	23	30	TRUE
			rplB "50S ribosomal protein L2"	llmg_2380	29572.6	1	3	3	3	0.0133	0.152	ATIGVVGNEQQSLINLGK	R	A	0.95	49.2	14.6	0	1	0	0	2	1841.01	190	207	TRUE
			rplB "50S ribosomal protein L2"	llmg_2380	29572.6	1	3	3	3	0.0133	0.152	SAGASAQVLGSEGK	R	Y	0.95	39.9	15.6	0	1	0	0	2	1261.64	157	170	TRUE
			rplB "50S ribosomal protein L2"	llmg_2380	29572.6	1	3	3	3	0.0133	0.152	VATIEYDPNR	K	T	0.95	34.2	16.3	0	1	0	0	2	1177.59	78	87	TRUE
277	0.03111	-1.5779	gshR "glutathione reductase"	llmg_1702	47822	1	17	17	19	0.123	0.434	AAGSDVTIISR	K	K	0.95	54.5	17.7	0	1	0	0	2	1089.59	183	193	TRUE
			gshR "glutathione reductase"	llmg_1702	47822	1	17	17	19	0.123	0.434	FTDGFLLTDGAGFEHK	K	T	0.95	45.3	15.3	0	1	0	0	2	1754.84	232	247	TRUE
			gshR "glutathione reductase"	llmg_1702	47822	1	17	17	19	0.123	0.434	ISFMGSGPISLELAQIAK	K	A	0.95	56.6	15.7	0	1	0	0	2	1878	165	182	TRUE
			gshR "glutathione reductase"	llmg_1702	47822	1	17	17	19	0.123	0.434	IYAMGDVLSK	K	A	0.95	44	13.2	0	1	0	0	2	1112.57	291	300	TRUE
			gshR "glutathione reductase"	llmg_1702	47822	1	17	17	19	0.123	0.434	KLNITDPYEK	R	S	0.95	33	16.6	0	1	0	0	2	1220.65	83	92	TRUE
			gshR "glutathione reductase"	llmg_1702	47822	1	17	17	19	0.123	0.434	LAEVGILTGTGIR	K	T	0.95	80.7	12.3	0	1	0	0	2	1299.76	343	355	TRUE
			gshR "glutathione reductase"	llmg_1702	47822	1	17	17	19	0.123	0.434	LNITDPYEK	K	S	0.95	44	16.9	0	1	0	0	2	1092.56	84	92	TRUE
			gshR "glutathione reductase"	llmg_1702	47822	1	17	17	19	0.123	0.434	MMMAVIEAK	K	S	0.95	44.5	12.6	0	3	0	0	2	1055.49	49	57	TRUE
			gshR "glutathione reductase"	llmg_1702	47822	1	17	17	19	0.123	0.434	MTLADVEK	K	M	0.945	30.6	16.4	0	1	0	0	2	906.461	412	419	TRUE
			gshR "glutathione reductase"	llmg_1702	47822	1	17	17	19	0.123	0.434	NQGINFIENISVSK	K	V	0.95	48.3	15.6	0	1	0	0	2	1562.82	215	228	TRUE
			gshR "glutathione reductase"	llmg_1702	47822	1	17	17	19	0.123	0.434	RLELDGDEFLK	R	T	0.95	45.8	16.3	0	1	0	0	2	1334.7	140	150	TRUE
			gshR "glutathione reductase"	llmg_1702	47822	1	17	17	19	0.123	0.434	SHVEHLK	K	G	0.946	30.7	17.7	0	1	0	0	2	849.458	58	64	TRUE
			gshR "glutathione reductase"	llmg_1702	47822	1	17	17	19	0.123	0.434	SNVAHFDEEMGQEFINYLK	K	N	0.95	49.6	10.8	0	1	0	0	2	2287.03	196	214	TRUE
			gshR "glutathione reductase"	llmg_1702	47822	1	17	17	19	0.123	0.434	TDLVIAGVGR	K	Q	0.95	64.3	17.2	0	1	0	0	2	1000.58	248	257	TRUE
			gshR "glutathione reductase"	llmg_1702	47822	1	17	17	19	0.123	0.434	TSNDFLALEELPAK	K	I	0.95	67.5	13.8	0	1	0	0	2	1547.8	151	164	TRUE
			gshR "glutathione reductase"	llmg_1702	47822	1	17	17	19	0.123	0.434	VGVETDHK	K	G	0.95	38.8	12.6	0	1	0	0	2	884.448	269	276	TRUE
			gshR "glutathione reductase"	llmg_1702	47822	1	17	17	19	0.123	0.434	VNDYLQTSNPK	K	I	0.95	60.4	15.4	0	1	0	0	2	1278.63	280	290	TRUE
			purA "adenylosuccinate synthetase"	llmg_2201	47335	1	11	12	12	0.0779	0.258	IADLLDKEIFEER	R	L	0.95	39.3	15.6	0	1	0	0	2	1590.84	147	159	TRUE
			purA "adenylosuccinate synthetase"	llmg_2201	47335	1	11	12	12	0.0779	0.258	ISTFSVGPGR	R	E	0.95	51.4	18.5	0	1	0	0	2	1020.55	409	418	TRUE
			purA "adenylosuccinate synthetase"	llmg_2201	47335	1	11	12	12	0.0779	0.258	ISVIGNGVVVNPK	K	S	0.95	58.4	9.54	0	1	0	0	2	1295.77	65	77	TRUE
			purA "adenylosuccinate synthetase"	llmg_2201	47335	1	11	12	12	0.0779	0.258	ITDFLSSNAEVIAR	K	Y	0.95	61.7	16.5	0	1	0	0	2	1535.81	19	32	TRUE
			purA "adenylosuccinate synthetase"	llmg_2201	47335	1	11	12	12	0.0779	0.258	KLDFLQEEAK	K	G	0.95	33.3	16.5	0	1	0	0	2	1220.65	111	120	TRUE
			purA "adenylosuccinate synthetase"	llmg_2201	47335	1	11	12	12	0.0779	0.258	LDFLQEEAK	K	G	0.95	46.2	16.9	0	1	0	0	2	1092.56	112	120	TRUE
			purA "adenylosuccinate synthetase"	llmg_2201	47335	1	11	12	12	0.0779	0.258	RVGELVGVR	R	I	0.95	47.3	13.6	0	1	0	0	2	984.596	400	408	TRUE
			purA "adenylosuccinate synthetase"	llmg_2201	47335	1	11	12	12	0.0779	0.258	SNGEQITHYPASLK	R	E	0.95	37.8	16.3	0	1	0	0	2	1544.77	349	362	TRUE
			purA "adenylosuccinate synthetase"	llmg_2201	47335	1	11	12	12	0.0779	0.258	TLEEIPEAAR	R	N	0.95	45.9	14.8	0	1	0	0	2	1128.59	386	395	TRUE
			purA "adenylosuccinate synthetase"	llmg_2201	47335	1	11	12	12	0.0779	0.258	YVTDTSVILNDALDAGK	K	R	0.95	76.5	15.3	0	1	0	0	2	1794.91	199	215	TRUE
			purA "adenylosuccinate synthetase"	llmg_2201	47335	1	11	12	12	0.0779	0.258	YVTDTSVILNDALDAGKR	K	V	0.95	64.6	16.2	0	1	1	0	2	1951.01	199	216	TRUE
			glyA "serine hydroxymethyltransferase"	llmg_0563	44805.9	1	6	6	6	0.039	0.19	AVMAAQGSVLTNK	K	Y	0.95	60.1	16.8	0	1	0	0	2	1305.68	42	54	TRUE
			glyA "serine hydroxymethyltransferase"	llmg_0563	44805.9	1	6	6	6	0.039	0.19	EAIPDETLSPFK	K	T	0.95	33.8	16.8	0	1	0	0	2	1346.68	347	358	TRUE
			glyA "serine hydroxymethyltransferase"	llmg_0563	44805.9	1	6	6	6	0.039	0.19	GGMILTNDEVLAK	R	K	0.95	62.4	17.9	0	1	0	0	2	1376.71	237	249	TRUE
			glyA "serine hydroxymethyltransferase"	llmg_0563	44805.9	1	6	6	6	0.039	0.19	LIAGGSDNHLLNLK	R	V	0.95	59.2	14.5	0	1	0	0	2	1464.82	309	322	TRUE
			glyA "serine hydroxymethyltransferase"	llmg_0563	44805.9	1	6	6	6	0.039	0.19	LIVAGASAYSR	K	L	0.95	53.1	14.6	0	1	0	0	2	1107.62	170	180	TRUE
			glyA "serine hydroxymethyltransferase"	llmg_0563	44805.9	1	6	6	6	0.039	0.19	QQQNIELIASENIVSK	R	A	0.95	59.5	13.8	0	1	0	0	2	1813.97	26	41	TRUE
			purB "adenylosuccinate lyase"	llmg_0783	49718.4	1	4	4	4	0.026	0.107	DLQNFTEIVK	K	T	0.95	31.5	17	0	1	0	0	2	1206.64	117	126	TRUE
			purB "adenylosuccinate lyase"	llmg_0783	49718.4	1	4	4	4	0.026	0.107	EAAYDLVQPLTAK	R	S	0.95	56.9	15.8	0	1	0	0	2	1418.75	370	382	TRUE
			purB "adenylosuccinate lyase"	llmg_0783	49718.4	1	4	4	4	0.026	0.107	NPIGSENMTGLAR	R	V	0.95	38.4	13.8	0	1	0	0	2	1375.66	271	283	TRUE
			purB "adenylosuccinate lyase"	llmg_0783	49718.4	1	4	4	4	0.026	0.107	SVSESLGEER	R	K	0.95	50.3	11.8	0	1	0	0	2	1092.52	77	86	TRUE
			gapB "glyceraldehyde 3-phosphate dehydrogenase"	llmg_2539	35800.9	1	4	4	4	0.026	0.149	AAAENIVPNSTGAAK	R	A	0.95	34.8	12.8	0	1	0	0	2	1413.73	202	216	TRUE
			gapB "glyceraldehyde 3-phosphate dehydrogenase"	llmg_2539	35800.9	1	4	4	4	0.026	0.149	KVVITAPGGSDVK	K	T	0.95	54.1	13.2	0	1	0	0	2	1270.74	117	129	TRUE
			gapB "glyceraldehyde 3-phosphate dehydrogenase"	llmg_2539	35800.9	1	4	4	4	0.026	0.149	VGTMTTVHGYTGDQMTLDGPHR	K	G	0.95	38.6	11.1	0	0	1	0	2	2406.08	172	193	TRUE
			gapB "glyceraldehyde 3-phosphate dehydrogenase"	llmg_2539	35800.9	1	4	4	4	0.026	0.149	VVITAPGGSDVK	K	T	0.95	36.2	15.7	0	1	0	0	2	1142.64	118	129	TRUE
			metK "S-adenosylmethionine synthetase"	llmg_2160	42955.8	1	3	4	4	0.026	0.12	KIIVDTYGGYAPHGGGAFSGK	R	D	0.95	39.8	14.6	0	0	1	0	2	2095.06	260	280	TRUE
			metK "S-adenosylmethionine synthetase"	llmg_2160	42955.8	1	3	4	4	0.026	0.12	RVDTVVISTQHAATATNEEIHDDVINK	K	V	0.95	82.4	13.8	0	0	1	1	2	2976.5	194	220	TRUE
			metK "S-adenosylmethionine synthetase"	llmg_2160	42955.8	1	3	4	4	0.026	0.12	VDTVVISTQHAATATNEEIHDDVINK	R	V	0.95	59.8	15.3	0	0	1	0	2	2820.4	195	220	TRUE
			lysA "LysA protein"	llmg_1185	47267	1	2	2	2	0.013	0.0621	AYEEILTANGIENLK	K	I	0.95	59.8	16	0	1	0	0	2	1677.87	255	269	TRUE
			lysA "LysA protein"	llmg_1185	47267	1	2	2	2	0.013	0.0621	SAEILLQEDGK	R	T	0.95	64.7	16.9	0	1	0	0	2	1202.63	385	395	TRUE
470	0.005769	-1.6554	rmlD "dTDP-4-dehydrorhamnose reductase"	llmg_0210	33108.8	1	8	8	10	0.0893	0.264	APESEYGR	K	T	0.95	39.6	13	0	1	0	0	2	908.411	122	129	TRUE
			rmlD "dTDP-4-dehydrorhamnose reductase"	llmg_0210	33108.8	1	8	8	10	0.0893	0.264	DTDVLVKPVDSSK	K	F	0.95	52.5	16.9	0	1	0	0	2	1402.74	232	244	TRUE
			rmlD "dTDP-4-dehydrorhamnose reductase"	llmg_0210	33108.8	1	8	8	10	0.0893	0.264	EILKDTDVLVKPVDSSK	K	F	0.95	34	11.8	0	0	1	0	2	1886.05	228	244	TRUE
			rmlD "dTDP-4-dehydrorhamnose reductase"	llmg_0210	33108.8	1	8	8	10	0.0893	0.264	GMAYTATDAK	R	E	0.95	29.9	10	0	2	0	0	2	1044.47	23	32	TRUE
			rmlD "dTDP-4-dehydrorhamnose reductase"	llmg_0210	33108.8	1	8	8	10	0.0893	0.264	HLGEEAVVASGVK	K	H	0.95	61.4	16.3	0	1	0	0	2	1295.7	132	144	TRUE
			rmlD "dTDP-4-dehydrorhamnose reductase"	llmg_0210	33108.8	1	8	8	10	0.0893	0.264	MILITGGNGQLGTELR	-	H	0.95	94.1	15.2	0	2	0	0	2	1688.9	1	16	TRUE
			rmlD "dTDP-4-dehydrorhamnose reductase"	llmg_0210	33108.8	1	8	8	10	0.0893	0.264	TKHLGEEAVVASGVK	R	H	0.95	45	13	0	0	1	0	2	1524.84	130	144	TRUE
			rmlD "dTDP-4-dehydrorhamnose reductase"	llmg_0210	33108.8	1	8	8	10	0.0893	0.264	TLAEFMVYLVNEK	R	A	0.95	25.9	16.7	0	1	0	0	2	1556.8	190	202	TRUE
			glyQ "glycyl-tRNA synthetase subunit alpha"	llmg_1478	36038.5	1	4	4	4	0.0357	0.126	FAFEESNQELLLK	K	L	0.95	66.4	16.1	0	1	0	0	2	1567.8	204	216	TRUE
			glyQ "glycyl-tRNA synthetase subunit alpha"	llmg_1478	36038.5	1	4	4	4	0.0357	0.126	GAVSVTER	R	A	0.95	33.5	15.6	0	1	0	0	2	818.437	255	262	TRUE
			glyQ "glycyl-tRNA synthetase subunit alpha"	llmg_1478	36038.5	1	4	4	4	0.0357	0.126	GLVHPAYDYILK	K	S	0.95	29.5	16.1	0	1	0	0	2	1388.76	232	243	TRUE
			glyQ "glycyl-tRNA synthetase subunit alpha"	llmg_1478	36038.5	1	4	4	4	0.0357	0.126	YGENPNR	R	L	0.95	29.3	11.1	0	1	0	0	2	849.385	69	75	TRUE
474	0.001967	-1.5662	telA1 "toxic anion resistance protein"	llmg_1116	44278.7	1	21	25	29	0.0863	0.64	ALNVYIAGAELK	K	V	0.95	74	14.1	0	1	0	0	2	1261.72	184	195	TRUE
			telA1 "toxic anion resistance protein"	llmg_1116	44278.7	1	21	25	29	0.0863	0.64	ASTIEAATENER	K	G	0.95	50.2	13.4	0	1	0	0	2	1291.61	320	331	TRUE
			telA1 "toxic anion resistance protein"	llmg_1116	44278.7	1	21	25	29	0.0863	0.64	EADQLDEQQK	K	S	0.95	37.6	11.8	0	1	0	0	2	1203.55	18	27	TRUE
			telA1 "toxic anion resistance protein"	llmg_1116	44278.7	1	21	25	29	0.0863	0.64	EAQESTDNALIIQK	K	V	0.95	71.1	16.2	0	1	0	0	2	1559.79	210	223	TRUE
			telA1 "toxic anion resistance protein"	llmg_1116	44278.7	1	21	25	29	0.0863	0.64	GLVDIETLK	R	L	0.95	35.1	17	0	1	0	0	2	987.573	332	340	TRUE
			telA1 "toxic anion resistance protein"	llmg_1116	44278.7	1	21	25	29	0.0863	0.64	IQTSINTAIPLWK	K	N	0.95	36.5	11.8	0	1	0	0	2	1484.85	269	281	TRUE
			telA1 "toxic anion resistance protein"	llmg_1116	44278.7	1	21	25	29	0.0863	0.64	ISAFSQSVLNK	K	V	0.95	80.9	14.6	0	1	0	0	2	1193.65	79	89	TRUE
			telA1 "toxic anion resistance protein"	llmg_1116	44278.7	1	21	25	29	0.0863	0.64	KEAQESTDNALIIQK	R	V	0.95	69	15.8	0	1	0	0	2	1687.89	209	223	TRUE
			telA1 "toxic anion resistance protein"	llmg_1116	44278.7	1	21	25	29	0.0863	0.64	LIQNTNQELAEK	R	I	0.95	54	15.9	0	1	0	0	2	1400.74	257	268	TRUE
			telA1 "toxic anion resistance protein"	llmg_1116	44278.7	1	21	25	29	0.0863	0.64	LLQLSNNK	K	Q	0.95	34.1	16.7	0	1	0	0	2	929.542	382	389	TRUE
			telA1 "toxic anion resistance protein"	llmg_1116	44278.7	1	21	25	29	0.0863	0.64	LNNEQQGLLQDNEMLDK	K	L	0.95	79.8	12	0	2	1	0	2	2017.95	157	173	TRUE
			telA1 "toxic anion resistance protein"	llmg_1116	44278.7	1	21	25	29	0.0863	0.64	LTQQNLVDTIQETMR	K	I	0.95	91.5	14.6	0	2	1	0	2	1805.91	341	355	TRUE
			telA1 "toxic anion resistance protein"	llmg_1116	44278.7	1	21	25	29	0.0863	0.64	LYDENLNYFK	K	A	0.95	42	16	0	1	0	0	2	1318.63	174	183	TRUE
			telA1 "toxic anion resistance protein"	llmg_1116	44278.7	1	21	25	29	0.0863	0.64	MDNPILDDLMTNDK	-	V	0.95	71.8	10	0	3	1	0	2	1650.74	1	14	TRUE
			telA1 "toxic anion resistance protein"	llmg_1116	44278.7	1	21	25	29	0.0863	0.64	MHQNASLAAVEVLSTDELEK	K	A	0.95	51	15.1	0	0	1	0	2	2201.08	33	52	TRUE
			telA1 "toxic anion resistance protein"	llmg_1116	44278.7	1	21	25	29	0.0863	0.64	NQVAIALTLLK	K	Q	0.95	61.4	7.78	0	1	0	0	2	1183.74	282	292	TRUE
			telA1 "toxic anion resistance protein"	llmg_1116	44278.7	1	21	25	29	0.0863	0.64	QLDESSAQSVINYGASAQDK	K	I	0.95	101	11.8	0	1	1	0	2	2110.99	59	78	TRUE
			telA1 "toxic anion resistance protein"	llmg_1116	44278.7	1	21	25	29	0.0863	0.64	QLTIQQAPQIR	R	L	0.95	53.5	11.1	0	1	0	0	2	1295.74	246	256	TRUE
			telA1 "toxic anion resistance protein"	llmg_1116	44278.7	1	21	25	29	0.0863	0.64	RQQGEVELSK	K	M	0.95	42.3	17.9	0	1	0	0	2	1173.62	364	373	TRUE
			telA1 "toxic anion resistance protein"	llmg_1116	44278.7	1	21	25	29	0.0863	0.64	VNDLESYK	K	N	0.95	40	16.3	0	1	0	0	2	967.474	224	231	TRUE
			telA1 "toxic anion resistance protein"	llmg_1116	44278.7	1	21	25	29	0.0863	0.64	VQELDTEILPQAR	K	K	0.95	64.6	16.1	0	1	0	0	2	1511.81	196	208	TRUE
			papL "tRNA CCA-pyrophosphorylase"	llmg_0942	46637.8	1	15	18	19	0.0565	0.393	AVFINDQLQIHDK	R	S	0.95	72.2	15.6	0	1	0	0	2	1540.81	333	345	TRUE
			papL "tRNA CCA-pyrophosphorylase"	llmg_0942	46637.8	1	15	18	19	0.0565	0.393	DLMDEFSLKPGPELGK	K	I	0.95	37.8	15.7	0	1	0	0	2	1791.88	354	369	TRUE
			papL "tRNA CCA-pyrophosphorylase"	llmg_0942	46637.8	1	15	18	19	0.0565	0.393	FASTLDFK	R	I	0.95	48.5	14.1	0	1	0	0	2	928.478	172	179	TRUE
			papL "tRNA CCA-pyrophosphorylase"	llmg_0942	46637.8	1	15	18	19	0.0565	0.393	FNEDALR	R	I	0.95	45.3	17.2	0	1	0	0	2	864.422	159	165	TRUE
			papL "tRNA CCA-pyrophosphorylase"	llmg_0942	46637.8	1	15	18	19	0.0565	0.393	FSNIDVK	R	A	0.95	44.8	18.1	0	1	0	0	2	822.436	267	273	TRUE
			papL "tRNA CCA-pyrophosphorylase"	llmg_0942	46637.8	1	15	18	19	0.0565	0.393	ISEHGFEAYFVGGSVR	K	D	0.95	54.4	15.4	0	1	1	0	2	1754.85	20	35	TRUE
			papL "tRNA CCA-pyrophosphorylase"	llmg_0942	46637.8	1	15	18	19	0.0565	0.393	LPEEFVQAQPVLEK	K	I	0.95	72.6	15.2	0	2	1	0	2	1626.87	6	19	TRUE
			papL "tRNA CCA-pyrophosphorylase"	llmg_0942	46637.8	1	15	18	19	0.0565	0.393	LTAVGSALER	R	F	0.95	62.9	17	0	1	0	0	2	1016.57	149	158	TRUE
			papL "tRNA CCA-pyrophosphorylase"	llmg_0942	46637.8	1	15	18	19	0.0565	0.393	NELKNEQIAILTEVK	K	K	0.95	69.5	13.6	0	1	0	0	2	1741.97	381	395	TRUE
			papL "tRNA CCA-pyrophosphorylase"	llmg_0942	46637.8	1	15	18	19	0.0565	0.393	NSEQAWAALLTR	K	F	0.95	59.3	15.6	0	1	0	0	2	1359.7	255	266	TRUE
			papL "tRNA CCA-pyrophosphorylase"	llmg_0942	46637.8	1	15	18	19	0.0565	0.393	RLTAVGSALER	R	F	0.95	36.9	16.7	0	1	0	0	2	1172.68	148	158	TRUE
			papL "tRNA CCA-pyrophosphorylase"	llmg_0942	46637.8	1	15	18	19	0.0565	0.393	SEAEHYEITTFR	K	T	0.95	42	12.8	0	1	1	0	2	1482.69	81	92	TRUE
			papL "tRNA CCA-pyrophosphorylase"	llmg_0942	46637.8	1	15	18	19	0.0565	0.393	SEIVIAGK	K	D	0.95	33	18.2	0	1	0	0	2	816.483	346	353	TRUE
			papL "tRNA CCA-pyrophosphorylase"	llmg_0942	46637.8	1	15	18	19	0.0565	0.393	VSNEFSK	K	Y	0.95	40.4	14.5	0	1	0	0	2	810.4	281	287	TRUE
			papL "tRNA CCA-pyrophosphorylase"	llmg_0942	46637.8	1	15	18	19	0.0565	0.393	YLPDFQDLALKK	K	V	0.95	41.8	14.9	0	1	0	0	2	1450.79	231	242	TRUE
			metK "S-adenosylmethionine synthetase"	llmg_2160	42955.8	1	14	16	17	0.0506	0.454	AIIPAELLDDETK	K	Y	0.95	41.4	15.3	0	1	0	0	2	1427.76	224	236	TRUE
			metK "S-adenosylmethionine synthetase"	llmg_2160	42955.8	1	14	16	17	0.0506	0.454	FVIGGPQGDSGLTGR	R	K	0.95	93.7	16	0	1	0	0	2	1460.75	245	259	TRUE
			metK "S-adenosylmethionine synthetase"	llmg_2160	42955.8	1	14	16	17	0.0506	0.454	HLFTSESVSEGHPDK	K	V	0.95	73.6	14.9	0	1	1	0	2	1669.78	5	19	TRUE
			metK "S-adenosylmethionine synthetase"	llmg_2160	42955.8	1	14	16	17	0.0506	0.454	IGYTDSENGFDYK	K	S	0.95	80.1	9.03	0	1	0	0	2	1508.65	77	89	TRUE
			metK "S-adenosylmethionine synthetase"	llmg_2160	42955.8	1	14	16	17	0.0506	0.454	IIVDTYGGYAPHGGGAFSGK	K	D	0.95	73.2	14.3	0	1	0	0	2	1966.97	261	280	TRUE
			metK "S-adenosylmethionine synthetase"	llmg_2160	42955.8	1	14	16	17	0.0506	0.454	KIIVDTYGGYAPHGGGAFSGK	R	D	0.95	76.9	14.5	0	1	0	0	2	2095.06	260	280	TRUE
			metK "S-adenosylmethionine synthetase"	llmg_2160	42955.8	1	14	16	17	0.0506	0.454	KSGEISYLRPDAK	R	S	0.95	44.1	17.6	0	1	0	0	2	1463.79	167	179	TRUE
			metK "S-adenosylmethionine synthetase"	llmg_2160	42955.8	1	14	16	17	0.0506	0.454	NIVAAGLADK	K	A	0.95	52.7	13	0	1	0	0	2	971.553	299	308	TRUE
			metK "S-adenosylmethionine synthetase"	llmg_2160	42955.8	1	14	16	17	0.0506	0.454	RVDTVVISTQHAATATNEEIHDDVINK	K	V	0.95	89.2	14.1	0	0	1	2	2	2976.5	194	220	TRUE
			metK "S-adenosylmethionine synthetase"	llmg_2160	42955.8	1	14	16	17	0.0506	0.454	SGEISYLRPDAK	K	S	0.95	60.3	17.2	0	1	0	0	2	1335.69	168	179	TRUE
			metK "S-adenosylmethionine synthetase"	llmg_2160	42955.8	1	14	16	17	0.0506	0.454	SVGVHVSLVEQSSDIAQGVNEAEEVR	K	D	0.95	57.8	12.8	0	0	1	0	2	2738.36	90	115	TRUE
			metK "S-adenosylmethionine synthetase"	llmg_2160	42955.8	1	14	16	17	0.0506	0.454	TDIELPWEQTDKVEELK	R	A	0.95	47	14	0	1	0	0	2	2073.04	378	394	TRUE
			metK "S-adenosylmethionine synthetase"	llmg_2160	42955.8	1	14	16	17	0.0506	0.454	VDTVVISTQHAATATNEEIHDDVINK	R	V	0.95	52.1	15.2	0	0	1	0	2	2820.4	195	220	TRUE
			metK "S-adenosylmethionine synthetase"	llmg_2160	42955.8	1	14	16	17	0.0506	0.454	VSDDELLAAIR	K	K	0.95	87.6	16.6	0	1	0	0	2	1201.64	335	345	TRUE
			murD "UDP-N-acetylmuramoyl-L-alanyl-D-glutamate synthetase"	llmg_0912	49176.6	1	14	16	17	0.0506	0.457	AQATDTLVMELSSFQLMGIDTFRPK	K	I	0.95	65.8	15.1	0	0	1	0	2	2831.4	158	182	TRUE
			murD "UDP-N-acetylmuramoyl-L-alanyl-D-glutamate synthetase"	llmg_0912	49176.6	1	14	16	17	0.0506	0.457	ATNILATQK	K	A	0.95	50.3	17.3	0	1	0	0	2	959.553	331	339	TRUE
			murD "UDP-N-acetylmuramoyl-L-alanyl-D-glutamate synthetase"	llmg_0912	49176.6	1	14	16	17	0.0506	0.457	EAQVLLEEGIK	K	V	0.95	41.2	15.2	0	1	0	0	2	1228.68	48	58	TRUE
			murD "UDP-N-acetylmuramoyl-L-alanyl-D-glutamate synthetase"	llmg_0912	49176.6	1	14	16	17	0.0506	0.457	GAENEAIVEVLTSFAGVK	R	H	0.95	80	14.1	0	1	1	0	2	1833.96	294	311	TRUE
			murD "UDP-N-acetylmuramoyl-L-alanyl-D-glutamate synthetase"	llmg_0912	49176.6	1	14	16	17	0.0506	0.457	GDLFIEAFESLK	R	-	0.95	54.9	15.3	0	1	0	0	2	1368.71	438	449	TRUE
			murD "UDP-N-acetylmuramoyl-L-alanyl-D-glutamate synthetase"	llmg_0912	49176.6	1	14	16	17	0.0506	0.457	GMVVFGQTADK	K	L	0.95	43	15.1	0	2	0	0	2	1168.57	374	384	TRUE
			murD "UDP-N-acetylmuramoyl-L-alanyl-D-glutamate synthetase"	llmg_0912	49176.6	1	14	16	17	0.0506	0.457	IQENMTADDFLILNFNQEK	R	C	0.95	80.1	14.3	0	1	1	0	2	2299.09	210	228	TRUE
			murD "UDP-N-acetylmuramoyl-L-alanyl-D-glutamate synthetase"	llmg_0912	49176.6	1	14	16	17	0.0506	0.457	LNIPVFASQNVATALK	K	E	0.95	74.3	13	0	1	0	0	2	1685.96	392	407	TRUE
			murD "UDP-N-acetylmuramoyl-L-alanyl-D-glutamate synthetase"	llmg_0912	49176.6	1	14	16	17	0.0506	0.457	LQYLGEIDGR	R	K	0.95	32	16.9	0	1	0	0	2	1163.61	314	323	TRUE
			murD "UDP-N-acetylmuramoyl-L-alanyl-D-glutamate synthetase"	llmg_0912	49176.6	1	14	16	17	0.0506	0.457	LSGNIGFPASEVAQK	K	A	0.95	34.9	17	0	1	0	0	2	1517.8	143	157	TRUE
			murD "UDP-N-acetylmuramoyl-L-alanyl-D-glutamate synthetase"	llmg_0912	49176.6	1	14	16	17	0.0506	0.457	LWLLAGGLDR	K	G	0.95	42.8	14	0	1	0	0	2	1113.64	349	358	TRUE
			murD "UDP-N-acetylmuramoyl-L-alanyl-D-glutamate synthetase"	llmg_0912	49176.6	1	14	16	17	0.0506	0.457	TTTTTLIADILNADGQSAK	K	L	0.95	72.5	16.4	0	1	0	0	2	1934.01	124	142	TRUE
			murD "UDP-N-acetylmuramoyl-L-alanyl-D-glutamate synthetase"	llmg_0912	49176.6	1	14	16	17	0.0506	0.457	VITGSHPIDLLDEDFALMVK	K	N	0.95	38.5	14.1	0	0	1	0	2	2229.15	59	78	TRUE
			murD "UDP-N-acetylmuramoyl-L-alanyl-D-glutamate synthetase"	llmg_0912	49176.6	1	14	16	17	0.0506	0.457	VSGAYVNEGK	K	I	0.95	56.6	16.4	0	1	0	0	2	1023.51	249	258	TRUE
			trmU "tRNA (5-methylaminomethyl-2-thiouridylate)-methyltransferase"	llmg_1725	42879.2	1	13	14	15	0.0446	0.464	AFLDYAMELGADYVATGHYAQVR	K	T	0.95	50.3	12	0	0	1	0	2	2577.21	121	143	TRUE
			trmU "tRNA (5-methylaminomethyl-2-thiouridylate)-methyltransferase"	llmg_1725	42879.2	1	13	14	15	0.0446	0.464	DQTYFLSQLTQEQLK	K	K	0.95	52.2	13.8	0	1	0	0	2	1841.93	161	175	TRUE
			trmU "tRNA (5-methylaminomethyl-2-thiouridylate)-methyltransferase"	llmg_1725	42879.2	1	13	14	15	0.0446	0.464	DVAAVADQIGVPYYSVNFEK	K	E	0.95	65.8	15.6	0	1	0	0	2	2185.08	68	87	TRUE
			trmU "tRNA (5-methylaminomethyl-2-thiouridylate)-methyltransferase"	llmg_1725	42879.2	1	13	14	15	0.0446	0.464	EQGYDVIGVFMK	K	N	0.95	43.2	14.3	0	1	0	0	2	1401.67	38	49	TRUE
			trmU "tRNA (5-methylaminomethyl-2-thiouridylate)-methyltransferase"	llmg_1725	42879.2	1	13	14	15	0.0446	0.464	FLGEYLPAQPGK	K	M	0.95	51.3	14.1	0	1	0	0	2	1319.7	220	231	TRUE
			trmU "tRNA (5-methylaminomethyl-2-thiouridylate)-methyltransferase"	llmg_1725	42879.2	1	13	14	15	0.0446	0.464	GADNNKDQTYFLSQLTQEQLK	R	K	0.95	52.5	15.2	0	0	1	0	2	2441.2	155	175	TRUE
			trmU "tRNA (5-methylaminomethyl-2-thiouridylate)-methyltransferase"	llmg_1725	42879.2	1	13	14	15	0.0446	0.464	KFLGEYLPAQPGK	K	M	0.95	48.5	16.4	0	1	0	0	2	1447.8	219	231	TRUE
			trmU "tRNA (5-methylaminomethyl-2-thiouridylate)-methyltransferase"	llmg_1725	42879.2	1	13	14	15	0.0446	0.464	MDNTNTQLMSGK	-	S	0.95	53.7	6.99	0	1	0	0	2	1371.59	1	12	TRUE
			trmU "tRNA (5-methylaminomethyl-2-thiouridylate)-methyltransferase"	llmg_1725	42879.2	1	13	14	15	0.0446	0.464	MMTLDGVEMGNHAGLMYYTIGQR	K	G	0.95	44.5	6.99	0	0	2	0	2	2636.16	232	254	TRUE
			trmU "tRNA (5-methylaminomethyl-2-thiouridylate)-methyltransferase"	llmg_1725	42879.2	1	13	14	15	0.0446	0.464	TDEDGTVHMLR	R	G	0.95	36	12.8	0	1	0	0	2	1273.58	144	154	TRUE
			trmU "tRNA (5-methylaminomethyl-2-thiouridylate)-methyltransferase"	llmg_1725	42879.2	1	13	14	15	0.0446	0.464	TMFPLGHLEKPEVR	K	R	0.95	32.6	15.2	0	1	0	0	2	1669.87	177	190	TRUE
			trmU "tRNA (5-methylaminomethyl-2-thiouridylate)-methyltransferase"	llmg_1725	42879.2	1	13	14	15	0.0446	0.464	VTVDFDEPVR	K	A	0.95	48.9	14.9	0	1	0	0	2	1176.59	340	349	TRUE
			trmU "tRNA (5-methylaminomethyl-2-thiouridylate)-methyltransferase"	llmg_1725	42879.2	1	13	14	15	0.0446	0.464	VVVGMSGGVDSSVTALLLK	R	E	0.95	71.7	13.2	0	1	1	0	2	1848.02	19	37	TRUE
			tufA "elongation factor Tu"	llmg_2050	43194	1	10	11	11	0.0327	0.365	ATDFASIDAAPEER	K	E	0.95	59.7	10.8	0	1	0	0	2	1492.69	44	57	TRUE
			tufA "elongation factor Tu"	llmg_2050	43194	1	10	11	11	0.0327	0.365	AVVTGIEMFR	K	K	0.95	46.4	15.1	0	1	0	0	2	1138.59	255	264	TRUE
			tufA "elongation factor Tu"	llmg_2050	43194	1	10	11	11	0.0327	0.365	DTDKPLLLPVEDVFSITGR	R	G	0.95	46.1	12.6	0	1	1	0	2	2115.13	206	224	TRUE
			tufA "elongation factor Tu"	llmg_2050	43194	1	10	11	11	0.0327	0.365	HYAHIDAPGHADYVK	R	N	0.95	35.7	14	0	0	1	0	2	1693.81	76	90	TRUE
			tufA "elongation factor Tu"	llmg_2050	43194	1	10	11	11	0.0327	0.365	LFEGEVYVLSK	K	E	0.95	79.4	16.4	0	1	0	0	2	1283.69	305	315	TRUE
			tufA "elongation factor Tu"	llmg_2050	43194	1	10	11	11	0.0327	0.365	NMITGAAQMDGAILVVAATDGPMPQTR	K	E	0.95	44.8	14.5	0	0	1	0	2	2777.33	91	117	TRUE
			tufA "elongation factor Tu"	llmg_2050	43194	1	10	11	11	0.0327	0.365	TLTEGLAGDNVGALLR	K	G	0.95	70.1	16.3	0	1	0	0	2	1599.87	266	281	TRUE
			tufA "elongation factor Tu"	llmg_2050	43194	1	10	11	11	0.0327	0.365	VEELMDIVDEYIPTPER	K	D	0.95	41.3	13	0	1	0	0	2	2063.99	189	205	TRUE
			tufA "elongation factor Tu"	llmg_2050	43194	1	10	11	11	0.0327	0.365	VGDEVEIVGIK	K	E	0.95	65.4	16.6	0	1	0	0	2	1157.64	239	249	TRUE
			tufA "elongation factor Tu"	llmg_2050	43194	1	10	11	11	0.0327	0.365	VGDEVEIVGIKEETK	K	K	0.95	30.6	14	0	0	1	0	2	1644.87	239	253	TRUE
			rpsA "30S ribosomal protein S1"	llmg_1724	44691.6	1	10	10	10	0.0298	0.275	ALEEAPARPAR	K	N	0.95	36.2	14.1	0	1	0	0	2	1180.64	350	360	TRUE
			rpsA "30S ribosomal protein S1"	llmg_1724	44691.6	1	10	10	10	0.0298	0.275	APVGSTVEGTVK	K	R	0.95	45	16.2	0	1	0	0	2	1144.62	277	288	TRUE
			rpsA "30S ribosomal protein S1"	llmg_1724	44691.6	1	10	10	10	0.0298	0.275	AVVEAEAIEMR	R	K	0.95	44.3	14.5	0	1	0	0	2	1233.61	175	185	TRUE
			rpsA "30S ribosomal protein S1"	llmg_1724	44691.6	1	10	10	10	0.0298	0.275	EAEGANVYLLSLK	K	R	0.95	61.6	17.2	0	1	0	0	2	1406.75	80	92	TRUE
			rpsA "30S ribosomal protein S1"	llmg_1724	44691.6	1	10	10	10	0.0298	0.275	EAFAQLQEGDIVEGTVSR	K	V	0.95	73.3	16	0	1	0	0	2	1948.96	187	204	TRUE
			rpsA "30S ribosomal protein S1"	llmg_1724	44691.6	1	10	10	10	0.0298	0.275	FVGEEIEAK	K	I	0.95	42.2	17.2	0	1	0	0	2	1021.52	150	158	TRUE
			rpsA "30S ribosomal protein S1"	llmg_1724	44691.6	1	10	10	10	0.0298	0.275	GFIPASMIDTYFVK	R	D	0.95	31.4	13	0	1	0	0	2	1604.8	132	145	TRUE
			rpsA "30S ribosomal protein S1"	llmg_1724	44691.6	1	10	10	10	0.0298	0.275	KFVGEEIEAK	K	I	0.95	38.4	17.2	0	1	0	0	2	1149.62	149	158	TRUE
			rpsA "30S ribosomal protein S1"	llmg_1724	44691.6	1	10	10	10	0.0298	0.275	MNEFETLLNSVEDVK	-	V	0.95	61.8	13.8	0	1	0	0	2	1783.84	1	15	TRUE
			rpsA "30S ribosomal protein S1"	llmg_1724	44691.6	1	10	10	10	0.0298	0.275	VGQVVNVK	K	V	0.95	38.4	16.3	0	1	0	0	2	842.51	326	333	TRUE
			nusA "transcription elongation factor NusA"	llmg_1796	42875.6	1	10	10	10	0.0298	0.306	ATLVANALKPAR	K	I	0.95	36	6.99	0	1	0	0	2	1224.74	280	291	TRUE
			nusA "transcription elongation factor NusA"	llmg_1796	42875.6	1	10	10	10	0.0298	0.306	DQLSLAIGK	R	R	0.95	44.9	18.4	0	1	0	0	2	944.542	310	318	TRUE
			nusA "transcription elongation factor NusA"	llmg_1796	42875.6	1	10	10	10	0.0298	0.306	EMLNAFAMLEEQK	K	G	0.95	55.1	12.6	0	1	0	0	2	1585.72	4	16	TRUE
			nusA "transcription elongation factor NusA"	llmg_1796	42875.6	1	10	10	10	0.0298	0.306	GNFNVYSTR	K	E	0.95	42.5	14.8	0	1	0	0	2	1057.51	54	62	TRUE
			nusA "transcription elongation factor NusA"	llmg_1796	42875.6	1	10	10	10	0.0298	0.306	LAAHVTNSK	R	I	0.95	39.7	14	0	1	0	0	2	940.522	325	333	TRUE
			nusA "transcription elongation factor NusA"	llmg_1796	42875.6	1	10	10	10	0.0298	0.306	LEISLEDAHELNPHYEIGDK	R	I	0.95	83.9	14.6	0	0	1	0	2	2322.13	73	92	TRUE
			nusA "transcription elongation factor NusA"	llmg_1796	42875.6	1	10	10	10	0.0298	0.306	SKEMLNAFAMLEEQK	M	G	0.95	30.7	14.6	0	0	1	0	2	1800.85	2	16	TRUE
			nusA "transcription elongation factor NusA"	llmg_1796	42875.6	1	10	10	10	0.0298	0.306	VIVQSHDENVDAIGTMVGAK	K	G	0.95	35.1	16.9	0	0	1	0	2	2099.04	235	254	TRUE
			nusA "transcription elongation factor NusA"	llmg_1796	42875.6	1	10	10	10	0.0298	0.306	VYVTDVVLTPK	K	G	0.95	40.5	15.4	0	1	0	0	2	1233.71	180	190	TRUE
			nusA "transcription elongation factor NusA"	llmg_1796	42875.6	1	10	10	10	0.0298	0.306	YKDEIIQGTVEK	R	V	0.95	60.4	16.9	0	1	0	0	2	1422.75	133	144	TRUE
			fabF "3-oxoacyl-[acyl-carrier-protein] synthase II"	llmg_1783	42470.2	1	8	10	10	0.0298	0.369	AIHNVIGDK	K	A	0.95	33.1	18.1	0	1	0	0	2	966.537	315	323	TRUE
			fabF "3-oxoacyl-[acyl-carrier-protein] synthase II"	llmg_1783	42470.2	1	8	10	10	0.0298	0.369	GANILAEIVGYGNTNDAFHMTTPSGVGAENAIK	R	L	0.95	62.7	12	0	0	1	0	2	3348.62	250	282	TRUE
			fabF "3-oxoacyl-[acyl-carrier-protein] synthase II"	llmg_1783	42470.2	1	8	10	10	0.0298	0.369	GVAPLYVPLAIANMATGNVALR	K	T	0.95	59.8	8.45	0	1	1	0	2	2227.23	129	150	TRUE
			fabF "3-oxoacyl-[acyl-carrier-protein] synthase II"	llmg_1783	42470.2	1	8	10	10	0.0298	0.369	KGVAPLYVPLAIANMATGNVALR	R	T	0.95	34.8	8.45	0	0	1	0	2	2355.32	128	150	TRUE
			fabF "3-oxoacyl-[acyl-carrier-protein] synthase II"	llmg_1783	42470.2	1	8	10	10	0.0298	0.369	LALEEAGASPADVDYVNAHGTSTHANEETESK	K	A	0.95	82.9	6.99	0	0	1	1	2	3313.51	283	314	TRUE
			fabF "3-oxoacyl-[acyl-carrier-protein] synthase II"	llmg_1783	42470.2	1	8	10	10	0.0298	0.369	NSQAIVAK	K	G	0.95	37.1	19.1	0	1	0	0	2	830.474	117	124	TRUE
			fabF "3-oxoacyl-[acyl-carrier-protein] synthase II"	llmg_1783	42470.2	1	8	10	10	0.0298	0.369	SGFVMGEGSGVLILESLEHAQAR	R	G	0.95	47.1	15.4	0	0	1	0	2	2403.2	227	249	TRUE
			fabF "3-oxoacyl-[acyl-carrier-protein] synthase II"	llmg_1783	42470.2	1	8	10	10	0.0298	0.369	TGIGPITHFDAEATGISVAAEVK	K	E	0.95	33.4	15.1	0	0	1	0	2	2284.18	32	54	TRUE
			ldh "L-lactate dehydrogenase"	llmg_1120	35032.8	1	6	6	6	0.0179	0.24	AIIDEAFAKEEFASAVK	K	N	0.95	48.1	15.4	0	1	0	0	2	1838.95	308	324	TRUE
			ldh "L-lactate dehydrogenase"	llmg_1120	35032.8	1	6	6	6	0.0179	0.24	DAAYSIIAK	R	K	0.95	32.3	15.8	0	1	0	0	2	951.515	220	228	TRUE
			ldh "L-lactate dehydrogenase"	llmg_1120	35032.8	1	6	6	6	0.0179	0.24	GATFYGVAVALAR	K	I	0.95	49.4	15.1	0	1	0	0	2	1295.71	230	242	TRUE
			ldh "L-lactate dehydrogenase"	llmg_1120	35032.8	1	6	6	6	0.0179	0.24	MEASGAQLK	K	A	0.95	32.5	16.2	0	1	0	0	2	934.467	299	307	TRUE
			ldh "L-lactate dehydrogenase"	llmg_1120	35032.8	1	6	6	6	0.0179	0.24	TQGDAEDLSHALAFTSPK	K	K	0.95	62.4	11.8	0	1	0	0	2	1887.91	44	61	TRUE
			ldh "L-lactate dehydrogenase"	llmg_1120	35032.8	1	6	6	6	0.0179	0.24	VVGSGTSLDTAR	R	F	0.95	58.5	17.5	0	1	0	0	2	1162.61	143	154	TRUE
			pdp "pyrimidine-nucleoside phosphorylase"	llmg_1060	46607.3	1	5	5	5	0.0149	0.202	AQGGDPYAFEQLTAPLK	K	V	0.95	64.1	14.9	0	1	0	0	2	1805.91	313	329	TRUE
			pdp "pyrimidine-nucleoside phosphorylase"	llmg_1060	46607.3	1	5	5	5	0.0149	0.202	DVTATVDIIPLIASSVMSK	R	K	0.95	59.2	13.4	0	1	0	0	2	1976.06	171	189	TRUE
			pdp "pyrimidine-nucleoside phosphorylase"	llmg_1060	46607.3	1	5	5	5	0.0149	0.202	ETGIAIIGQSDELVK	K	A	0.95	56.8	15.9	0	1	0	0	2	1572.85	147	161	TRUE
			pdp "pyrimidine-nucleoside phosphorylase"	llmg_1060	46607.3	1	5	5	5	0.0149	0.202	ETVAVITNMSQPLGFAIGNR	R	N	0.95	75.7	15.2	0	1	0	0	2	2134.1	233	252	TRUE
			pdp "pyrimidine-nucleoside phosphorylase"	llmg_1060	46607.3	1	5	5	5	0.0149	0.202	NEMTEAVNTLQGNAPK	R	E	0.95	32.2	13.6	0	0	1	0	2	1732.82	253	268	TRUE
			gnd "6-phosphogluconate dehydrogenase"	llmg_0586	52444.8	1	5	5	5	0.0149	0.15	EAYDLVAPIFEQIAAK	K	A	0.95	42.8	15.4	0	1	0	0	2	1777.94	147	162	TRUE
			gnd "6-phosphogluconate dehydrogenase"	llmg_0586	52444.8	1	5	5	5	0.0149	0.15	GYTVAIYNR	R	T	0.95	48.3	13.6	0	1	0	0	2	1056.55	26	34	TRUE
			gnd "6-phosphogluconate dehydrogenase"	llmg_0586	52444.8	1	5	5	5	0.0149	0.15	IMSYAQGFAQLR	K	K	0.95	49.3	15.3	0	1	0	0	2	1400.7	332	343	TRUE
			gnd "6-phosphogluconate dehydrogenase"	llmg_0586	52444.8	1	5	5	5	0.0149	0.15	NAELADSGINFIGTGVSGGEK	R	G	0.95	85.7	15.3	0	1	0	0	2	2035.99	112	132	TRUE
			gnd "6-phosphogluconate dehydrogenase"	llmg_0586	52444.8	1	5	5	5	0.0149	0.15	SENLPANLIQAQR	R	D	0.95	50.2	15.6	0	1	0	0	2	1453.78	435	447	TRUE
			typA "GTP-binding protein TypA/BipA homolog"	llmg_2292	68236.6	0.999	2	2	2	0.00595	0.0392	DNDLTVNITK	R	M	0.95	55.9	16.5	0	1	0	0	2	1132.59	538	547	TRUE
			typA "GTP-binding protein TypA/BipA homolog"	llmg_2292	68236.6	0.999	2	2	2	0.00595	0.0392	GLIGFTTEFMSMTR	R	G	0.95	60	13.8	0	1	0	0	2	1622.76	455	468	TRUE
476	0.0002734	-1.5532	metK "S-adenosylmethionine synthetase"	llmg_2160	42955.8	1	19	26	72	0.229	0.476	AIIPAELLDDETK	K	Y	0.95	64.8	15.3	0	8	0	0	2	1427.76	224	236	TRUE
			metK "S-adenosylmethionine synthetase"	llmg_2160	42955.8	1	19	26	72	0.229	0.476	AIIPAELLDDETKYFINPTGR	K	F	0.95	69.5	13.8	0	1	1	0	2	2376.25	224	244	TRUE
			metK "S-adenosylmethionine synthetase"	llmg_2160	42955.8	1	19	26	72	0.229	0.476	FVIGGPQGDSGLTGR	R	K	0.95	108	16.1	0	6	0	0	2	1460.75	245	259	TRUE
			metK "S-adenosylmethionine synthetase"	llmg_2160	42955.8	1	19	26	72	0.229	0.476	FVIGGPQGDSGLTGRK	R	I	0.95	77.3	14.5	0	1	0	0	2	1588.85	245	260	TRUE
			metK "S-adenosylmethionine synthetase"	llmg_2160	42955.8	1	19	26	72	0.229	0.476	HLFTSESVSEGHPDK	K	V	0.95	81.5	14.5	0	1	0	0	2	1669.78	5	19	TRUE
			metK "S-adenosylmethionine synthetase"	llmg_2160	42955.8	1	19	26	72	0.229	0.476	IGYTDSENGFDYK	K	S	0.95	60.7	8.45	0	2	0	0	2	1508.65	77	89	TRUE
			metK "S-adenosylmethionine synthetase"	llmg_2160	42955.8	1	19	26	72	0.229	0.476	IIVDTYGGYAPHGGGAFSGK	K	D	0.95	75.2	14.5	0	1	4	0	2	1966.97	261	280	TRUE
			metK "S-adenosylmethionine synthetase"	llmg_2160	42955.8	1	19	26	72	0.229	0.476	KIIVDTYGGYAPHGGGAFSGK	R	D	0.95	79.2	14.5	0	1	1	0	2	2095.06	260	280	TRUE
			metK "S-adenosylmethionine synthetase"	llmg_2160	42955.8	1	19	26	72	0.229	0.476	KSGEISYLRPDAK	R	S	0.95	40.5	16.9	0	1	0	0	2	1463.79	167	179	TRUE
			metK "S-adenosylmethionine synthetase"	llmg_2160	42955.8	1	19	26	72	0.229	0.476	NIVAAGLADK	K	A	0.95	47.6	13	0	2	0	0	2	971.553	299	308	TRUE
			metK "S-adenosylmethionine synthetase"	llmg_2160	42955.8	1	19	26	72	0.229	0.476	RVDTVVISTQHAATATNEEIHDDVINK	K	V	0.95	89.1	14.3	0	0	5	10	2	2976.5	194	220	TRUE
			metK "S-adenosylmethionine synthetase"	llmg_2160	42955.8	1	19	26	72	0.229	0.476	SGEISYLRPDAK	K	S	0.95	51.7	17.3	0	1	1	0	2	1335.69	168	179	TRUE
			metK "S-adenosylmethionine synthetase"	llmg_2160	42955.8	1	19	26	72	0.229	0.476	SVGVHVSLVEQSSDIAQGVNEAEEVR	K	D	0.95	53.3	12.8	0	0	1	0	2	2738.36	90	115	TRUE
			metK "S-adenosylmethionine synthetase"	llmg_2160	42955.8	1	19	26	72	0.229	0.476	TDIELPWEQTDK	R	V	0.95	59.3	15.1	0	1	0	0	2	1474.71	378	389	TRUE
			metK "S-adenosylmethionine synthetase"	llmg_2160	42955.8	1	19	26	72	0.229	0.476	TDIELPWEQTDKVEELK	R	A	0.95	67.3	13.6	0	1	1	0	2	2073.04	378	394	TRUE
			metK "S-adenosylmethionine synthetase"	llmg_2160	42955.8	1	19	26	72	0.229	0.476	VDTVVISTQHAATATNEEIHDDVINK	R	V	0.95	58.6	15.3	0	0	2	0	2	2820.4	195	220	TRUE
			metK "S-adenosylmethionine synthetase"	llmg_2160	42955.8	1	19	26	72	0.229	0.476	VSDDELLAAIR	K	K	0.95	89.8	16	0	15	0	0	2	1201.64	335	345	TRUE
			metK "S-adenosylmethionine synthetase"	llmg_2160	42955.8	1	19	26	72	0.229	0.476	VSDDELLAAIRK	K	V	0.95	49.7	17.1	0	1	1	0	2	1329.74	335	346	TRUE
			metK "S-adenosylmethionine synthetase"	llmg_2160	42955.8	1	19	26	72	0.229	0.476	YFINPTGR	K	F	0.95	32.8	17.2	0	2	0	0	2	967.5	237	244	TRUE
			telA1 "toxic anion resistance protein"	llmg_1116	44278.7	1	18	20	22	0.0701	0.561	ALNVYIAGAELK	K	V	0.95	70.8	14.1	0	1	0	0	2	1261.72	184	195	TRUE
			telA1 "toxic anion resistance protein"	llmg_1116	44278.7	1	18	20	22	0.0701	0.561	ASTIEAATENER	K	G	0.95	48.8	13	0	1	0	0	2	1291.61	320	331	TRUE
			telA1 "toxic anion resistance protein"	llmg_1116	44278.7	1	18	20	22	0.0701	0.561	EADQLDEQQK	K	S	0.95	46.1	11.8	0	1	0	0	2	1203.55	18	27	TRUE
			telA1 "toxic anion resistance protein"	llmg_1116	44278.7	1	18	20	22	0.0701	0.561	EAQESTDNALIIQK	K	V	0.95	49.7	16.3	0	1	0	0	2	1559.79	210	223	TRUE
			telA1 "toxic anion resistance protein"	llmg_1116	44278.7	1	18	20	22	0.0701	0.561	GLVDIETLK	R	L	0.95	38.9	17	0	1	0	0	2	987.573	332	340	TRUE
			telA1 "toxic anion resistance protein"	llmg_1116	44278.7	1	18	20	22	0.0701	0.561	IQTSINTAIPLWK	K	N	0.95	29.5	11.8	0	1	0	0	2	1484.85	269	281	TRUE
			telA1 "toxic anion resistance protein"	llmg_1116	44278.7	1	18	20	22	0.0701	0.561	KEAQESTDNALIIQK	R	V	0.95	61.1	15.8	0	1	1	0	2	1687.89	209	223	TRUE
			telA1 "toxic anion resistance protein"	llmg_1116	44278.7	1	18	20	22	0.0701	0.561	LIQNTNQELAEK	R	I	0.95	61.8	15.9	0	1	0	0	2	1400.74	257	268	TRUE
			telA1 "toxic anion resistance protein"	llmg_1116	44278.7	1	18	20	22	0.0701	0.561	LNNEQQGLLQDNEMLDK	K	L	0.95	62	12.3	0	1	1	0	2	2017.95	157	173	TRUE
			telA1 "toxic anion resistance protein"	llmg_1116	44278.7	1	18	20	22	0.0701	0.561	LTQQNLVDTIQETMR	K	I	0.95	87.3	14.6	0	2	0	0	2	1805.91	341	355	TRUE
			telA1 "toxic anion resistance protein"	llmg_1116	44278.7	1	18	20	22	0.0701	0.561	MDNPILDDLMTNDK	-	V	0.95	73	10	0	2	0	0	2	1650.74	1	14	TRUE
			telA1 "toxic anion resistance protein"	llmg_1116	44278.7	1	18	20	22	0.0701	0.561	MEEEIKEK	K	L	0.95	28.2	13	0	1	0	0	2	1051.5	374	381	TRUE
			telA1 "toxic anion resistance protein"	llmg_1116	44278.7	1	18	20	22	0.0701	0.561	MHQNASLAAVEVLSTDELEK	K	A	0.95	34.2	14.9	0	0	1	0	2	2201.08	33	52	TRUE
			telA1 "toxic anion resistance protein"	llmg_1116	44278.7	1	18	20	22	0.0701	0.561	NQVAIALTLLK	K	Q	0.95	54.3	7.78	0	1	0	0	2	1183.74	282	292	TRUE
			telA1 "toxic anion resistance protein"	llmg_1116	44278.7	1	18	20	22	0.0701	0.561	QLDESSAQSVINYGASAQDK	K	I	0.95	105	11.8	0	1	0	0	2	2110.99	59	78	TRUE
			telA1 "toxic anion resistance protein"	llmg_1116	44278.7	1	18	20	22	0.0701	0.561	QLTIQQAPQIR	R	L	0.95	52.6	11.1	0	1	0	0	2	1295.74	246	256	TRUE
			telA1 "toxic anion resistance protein"	llmg_1116	44278.7	1	18	20	22	0.0701	0.561	VNDLESYK	K	N	0.95	40.3	16.3	0	1	0	0	2	967.474	224	231	TRUE
			telA1 "toxic anion resistance protein"	llmg_1116	44278.7	1	18	20	22	0.0701	0.561	VQELDTEILPQAR	K	K	0.95	63.4	15.1	0	1	0	0	2	1511.81	196	208	TRUE
			pdp "pyrimidine-nucleoside phosphorylase"	llmg_1060	46607.3	1	12	13	13	0.0414	0.381	AQGGDPYAFEQLTAPLK	K	V	0.95	72.5	14.3	0	1	0	0	2	1805.91	313	329	TRUE
			pdp "pyrimidine-nucleoside phosphorylase"	llmg_1060	46607.3	1	12	13	13	0.0414	0.381	DVTATVDIIPLIASSVMSK	R	K	0.95	87	13	0	1	0	0	2	1976.06	171	189	TRUE
			pdp "pyrimidine-nucleoside phosphorylase"	llmg_1060	46607.3	1	12	13	13	0.0414	0.381	ETGIAIIGQSDELVK	K	A	0.95	72.1	15.9	0	1	0	0	2	1572.85	147	161	TRUE
			pdp "pyrimidine-nucleoside phosphorylase"	llmg_1060	46607.3	1	12	13	13	0.0414	0.381	ETVAVITNMSQPLGFAIGNR	R	N	0.95	83.1	15.7	0	1	0	0	2	2134.1	233	252	TRUE
			pdp "pyrimidine-nucleoside phosphorylase"	llmg_1060	46607.3	1	12	13	13	0.0414	0.381	GLGHTGGTLDK	R	L	0.95	34.5	15.6	0	1	0	0	2	1055.55	115	125	TRUE
			pdp "pyrimidine-nucleoside phosphorylase"	llmg_1060	46607.3	1	12	13	13	0.0414	0.381	GLGHTGGTLDKLESIPGFK	R	F	0.95	30.4	16	0	0	1	0	2	1927.03	115	133	TRUE
			pdp "pyrimidine-nucleoside phosphorylase"	llmg_1060	46607.3	1	12	13	13	0.0414	0.381	LLAQTMVDLGK	R	S	0.95	69.5	15.7	0	1	0	0	2	1188.67	218	228	TRUE
			pdp "pyrimidine-nucleoside phosphorylase"	llmg_1060	46607.3	1	12	13	13	0.0414	0.381	NEMTEAVNTLQGNAPK	R	E	0.95	89.3	13	0	1	1	0	2	1732.82	253	268	TRUE
			pdp "pyrimidine-nucleoside phosphorylase"	llmg_1060	46607.3	1	12	13	13	0.0414	0.381	TEEEFIK	K	Q	0.95	28.7	15.7	0	1	0	0	2	895.441	137	143	TRUE
			pdp "pyrimidine-nucleoside phosphorylase"	llmg_1060	46607.3	1	12	13	13	0.0414	0.381	VEVGELIASLYSNR	R	E	0.95	65.5	16.7	0	1	0	0	2	1549.82	386	399	TRUE
			pdp "pyrimidine-nucleoside phosphorylase"	llmg_1060	46607.3	1	12	13	13	0.0414	0.381	VTLILAPLVASFGVPVAK	K	M	0.95	61.6	6.02	0	1	0	0	2	1795.11	93	110	TRUE
			pdp "pyrimidine-nucleoside phosphorylase"	llmg_1060	46607.3	1	12	13	13	0.0414	0.381	YQVDIHAK	K	A	0.95	39.4	14.8	0	1	0	0	2	973.511	332	339	TRUE
			rpsA "30S ribosomal protein S1"	llmg_1724	44691.6	1	11	12	14	0.0446	0.275	ALEEAPARPAR	K	N	0.95	34.4	13.6	0	1	0	0	2	1180.64	350	360	TRUE
			rpsA "30S ribosomal protein S1"	llmg_1724	44691.6	1	11	12	14	0.0446	0.275	APVGSTVEGTVK	K	R	0.95	72	16.2	0	1	0	0	2	1144.62	277	288	TRUE
			rpsA "30S ribosomal protein S1"	llmg_1724	44691.6	1	11	12	14	0.0446	0.275	AVVEAEAIEMR	R	K	0.95	57.2	15.1	0	2	0	0	2	1233.61	175	185	TRUE
			rpsA "30S ribosomal protein S1"	llmg_1724	44691.6	1	11	12	14	0.0446	0.275	EAEGANVYLLSLK	K	R	0.95	59.6	17.2	0	1	0	0	2	1406.75	80	92	TRUE
			rpsA "30S ribosomal protein S1"	llmg_1724	44691.6	1	11	12	14	0.0446	0.275	GFIPASMIDTYFVK	R	D	0.95	54.2	12.8	0	2	0	0	2	1604.8	132	145	TRUE
			rpsA "30S ribosomal protein S1"	llmg_1724	44691.6	1	11	12	14	0.0446	0.275	IKRPSDAVKPGDVVNVK	R	I	0.95	34.2	6.99	0	0	1	0	2	1822.06	231	247	TRUE
			rpsA "30S ribosomal protein S1"	llmg_1724	44691.6	1	11	12	14	0.0446	0.275	MNEFETLLNSVEDVK	-	V	0.95	77.3	14.1	0	1	1	0	2	1783.84	1	15	TRUE
			rpsA "30S ribosomal protein S1"	llmg_1724	44691.6	1	11	12	14	0.0446	0.275	RAVVEAEAIEMR	R	K	0.95	28.8	16.6	0	0	1	0	2	1389.72	174	185	TRUE
			rpsA "30S ribosomal protein S1"	llmg_1724	44691.6	1	11	12	14	0.0446	0.275	RPSDAVKPGDVVNVK	K	I	0.95	43.6	13.6	0	1	0	0	2	1580.88	233	247	TRUE
			rpsA "30S ribosomal protein S1"	llmg_1724	44691.6	1	11	12	14	0.0446	0.275	VGQVVNVK	K	V	0.95	45.6	16.5	0	1	0	0	2	842.51	326	333	TRUE
			rpsA "30S ribosomal protein S1"	llmg_1724	44691.6	1	11	12	14	0.0446	0.275	VLDVKPAEER	K	I	0.95	45.7	12.8	0	1	0	0	2	1155.64	334	343	TRUE
			papL "tRNA CCA-pyrophosphorylase"	llmg_0942	46637.8	1	10	10	10	0.0318	0.226	FASTLDFK	R	I	0.95	34.2	14.9	0	1	0	0	2	928.478	172	179	TRUE
			papL "tRNA CCA-pyrophosphorylase"	llmg_0942	46637.8	1	10	10	10	0.0318	0.226	FSNIDVK	R	A	0.95	32.7	18.1	0	1	0	0	2	822.436	267	273	TRUE
			papL "tRNA CCA-pyrophosphorylase"	llmg_0942	46637.8	1	10	10	10	0.0318	0.226	ISEHGFEAYFVGGSVR	K	D	0.95	38.8	15.9	0	0	1	0	2	1754.85	20	35	TRUE
			papL "tRNA CCA-pyrophosphorylase"	llmg_0942	46637.8	1	10	10	10	0.0318	0.226	LPEEFVQAQPVLEK	K	I	0.95	79.5	14.9	0	1	0	0	2	1626.87	6	19	TRUE
			papL "tRNA CCA-pyrophosphorylase"	llmg_0942	46637.8	1	10	10	10	0.0318	0.226	LTAVGSALER	R	F	0.95	35.3	16.4	0	1	0	0	2	1016.57	149	158	TRUE
			papL "tRNA CCA-pyrophosphorylase"	llmg_0942	46637.8	1	10	10	10	0.0318	0.226	NELKNEQIAILTEVK	K	K	0.947	27.4	14	0	0	1	0	2	1741.97	381	395	TRUE
			papL "tRNA CCA-pyrophosphorylase"	llmg_0942	46637.8	1	10	10	10	0.0318	0.226	NEQIAILTEVK	K	K	0.95	48.2	15.3	0	1	0	0	2	1257.71	385	395	TRUE
			papL "tRNA CCA-pyrophosphorylase"	llmg_0942	46637.8	1	10	10	10	0.0318	0.226	RLTAVGSALER	R	F	0.95	29.8	16.7	0	1	0	0	2	1172.68	148	158	TRUE
			papL "tRNA CCA-pyrophosphorylase"	llmg_0942	46637.8	1	10	10	10	0.0318	0.226	SEAEHYEITTFR	K	T	0.95	27.9	12.8	0	0	1	0	2	1482.69	81	92	TRUE
			papL "tRNA CCA-pyrophosphorylase"	llmg_0942	46637.8	1	10	10	10	0.0318	0.226	SEIVIAGK	K	D	0.95	31.3	18.2	0	1	0	0	2	816.483	346	353	TRUE
			llmg_1321 "hypothetical protein"	llmg_1321	46049.3	1	9	10	10	0.0318	0.26	GGINPTQEEFLDK	K	K	0.95	52.4	15.4	0	1	0	0	2	1447.71	310	322	TRUE
			llmg_1321 "hypothetical protein"	llmg_1321	46049.3	1	9	10	10	0.0318	0.26	GGINPTQEEFLDKK	K	T	0.95	76.2	15.1	0	1	0	0	2	1575.8	310	323	TRUE
			llmg_1321 "hypothetical protein"	llmg_1321	46049.3	1	9	10	10	0.0318	0.26	IPVPYFIFGDR	R	L	0.95	42.9	14.1	0	1	0	0	2	1323.71	75	85	TRUE
			llmg_1321 "hypothetical protein"	llmg_1321	46049.3	1	9	10	10	0.0318	0.26	ISSAGFNLIR	R	I	0.95	42.6	15.8	0	1	0	0	2	1077.61	65	74	TRUE
			llmg_1321 "hypothetical protein"	llmg_1321	46049.3	1	9	10	10	0.0318	0.26	LAADSAPISLEFLK	K	E	0.95	58.9	17.8	0	1	0	0	2	1474.82	192	205	TRUE
			llmg_1321 "hypothetical protein"	llmg_1321	46049.3	1	9	10	10	0.0318	0.26	NHAALWGIEVINEPITER	K	I	0.95	37.5	14.3	0	0	1	0	2	2062.07	157	174	TRUE
			llmg_1321 "hypothetical protein"	llmg_1321	46049.3	1	9	10	10	0.0318	0.26	NVMLDTHQYVMIAELK	K	G	0.95	41.7	15.7	0	1	1	0	2	1936.95	247	262	TRUE
			llmg_1321 "hypothetical protein"	llmg_1321	46049.3	1	9	10	10	0.0318	0.26	SEFITETDFLR	R	I	0.95	63.5	15.1	0	1	0	0	2	1357.66	54	64	TRUE
			llmg_1321 "hypothetical protein"	llmg_1321	46049.3	1	9	10	10	0.0318	0.26	VYLDDLGK	K	Q	0.95	32.9	15.8	0	1	0	0	2	922.489	273	280	TRUE
			fabF "3-oxoacyl-[acyl-carrier-protein] synthase II"	llmg_1783	42470.2	1	8	9	10	0.0318	0.369	AIHNVIGDK	K	A	0.95	34.9	18.1	0	1	0	0	2	966.537	315	323	TRUE
			fabF "3-oxoacyl-[acyl-carrier-protein] synthase II"	llmg_1783	42470.2	1	8	9	10	0.0318	0.369	GANILAEIVGYGNTNDAFHMTTPSGVGAENAIK	R	L	0.95	93.2	11.8	0	0	1	0	2	3348.62	250	282	TRUE
			fabF "3-oxoacyl-[acyl-carrier-protein] synthase II"	llmg_1783	42470.2	1	8	9	10	0.0318	0.369	GVAPLYVPLAIANMATGNVALR	K	T	0.95	67.3	10	0	1	0	0	2	2227.23	129	150	TRUE
			fabF "3-oxoacyl-[acyl-carrier-protein] synthase II"	llmg_1783	42470.2	1	8	9	10	0.0318	0.369	KGVAPLYVPLAIANMATGNVALR	R	T	0.95	60.3	7.78	0	0	1	0	2	2355.32	128	150	TRUE
			fabF "3-oxoacyl-[acyl-carrier-protein] synthase II"	llmg_1783	42470.2	1	8	9	10	0.0318	0.369	LALEEAGASPADVDYVNAHGTSTHANEETESK	K	A	0.95	80.7	6.99	0	0	1	0	2	3313.51	283	314	TRUE
			fabF "3-oxoacyl-[acyl-carrier-protein] synthase II"	llmg_1783	42470.2	1	8	9	10	0.0318	0.369	NSQAIVAK	K	G	0.95	43.8	19.1	0	1	0	0	2	830.474	117	124	TRUE
			fabF "3-oxoacyl-[acyl-carrier-protein] synthase II"	llmg_1783	42470.2	1	8	9	10	0.0318	0.369	SGFVMGEGSGVLILESLEHAQAR	R	G	0.95	67.4	15.4	0	1	1	0	2	2403.2	227	249	TRUE
			fabF "3-oxoacyl-[acyl-carrier-protein] synthase II"	llmg_1783	42470.2	1	8	9	10	0.0318	0.369	TGIGPITHFDAEATGISVAAEVK	K	E	0.95	40.9	14.3	0	0	2	0	2	2284.18	32	54	TRUE
			aroA "3-phosphoshikimate 1-carboxyvinyltransferase"	llmg_1926	45787.7	1	7	8	8	0.0255	0.258	AEAIQTSYPSFFDDLEK	R	L	0.95	36.5	13.8	0	1	0	0	2	1960.92	409	425	TRUE
			aroA "3-phosphoshikimate 1-carboxyvinyltransferase"	llmg_1926	45787.7	1	7	8	8	0.0255	0.258	ALDMGNSGTSTR	K	L	0.95	45.9	11.1	0	1	0	0	2	1225.55	85	96	TRUE
			aroA "3-phosphoshikimate 1-carboxyvinyltransferase"	llmg_1926	45787.7	1	7	8	8	0.0255	0.258	GEDVLSTIEAFR	R	A	0.95	55.9	17.2	0	1	0	0	2	1336.67	45	56	TRUE
			aroA "3-phosphoshikimate 1-carboxyvinyltransferase"	llmg_1926	45787.7	1	7	8	8	0.0255	0.258	GTEISGDLIPR	K	L	0.95	45.5	16.2	0	1	0	0	2	1157.62	299	309	TRUE
			aroA "3-phosphoshikimate 1-carboxyvinyltransferase"	llmg_1926	45787.7	1	7	8	8	0.0255	0.258	IAVVADALNSMGANIEPTDDGMIIQGGTK	R	L	0.95	57.7	13.8	0	0	1	0	2	2933.42	344	372	TRUE
			aroA "3-phosphoshikimate 1-carboxyvinyltransferase"	llmg_1926	45787.7	1	7	8	8	0.0255	0.258	LHAPENAINTLGDHR	K	I	0.95	32	14.3	0	0	1	0	2	1657.84	373	387	TRUE
			aroA "3-phosphoshikimate 1-carboxyvinyltransferase"	llmg_1926	45787.7	1	7	8	8	0.0255	0.258	SAVIFAALQAEGLTK	K	V	0.95	86.8	15.1	0	1	1	0	2	1518.85	171	185	TRUE
			nadR "putative Nicotinamide-nucleotide adenylyltransferase"	llmg_2241	44044.5	1	6	7	7	0.0223	0.203	EAFNDEENIK	R	V	0.95	40.5	9.03	0	1	0	0	2	1208.54	72	81	TRUE
			nadR "putative Nicotinamide-nucleotide adenylyltransferase"	llmg_2241	44044.5	1	6	7	7	0.0223	0.203	EDFEQLEPLFR	K	K	0.95	38.9	13.2	0	1	0	0	2	1422.69	276	286	TRUE
			nadR "putative Nicotinamide-nucleotide adenylyltransferase"	llmg_2241	44044.5	1	6	7	7	0.0223	0.203	EVNSPANQGIVFLDTDAIVTR	R	V	0.95	87.6	14.3	0	1	1	0	2	2259.16	246	266	TRUE
			nadR "putative Nicotinamide-nucleotide adenylyltransferase"	llmg_2241	44044.5	1	6	7	7	0.0223	0.203	EYEEAFNIDDDELK	R	M	0.95	48.6	10.4	0	1	0	0	2	1729.74	215	228	TRUE
			nadR "putative Nicotinamide-nucleotide adenylyltransferase"	llmg_2241	44044.5	1	6	7	7	0.0223	0.203	GAQIGLPLEK	R	R	0.95	30.6	12	0	1	0	0	2	1025.6	56	65	TRUE
			nadR "putative Nicotinamide-nucleotide adenylyltransferase"	llmg_2241	44044.5	1	6	7	7	0.0223	0.203	MITGQYDANSR	R	E	0.95	30.1	10	0	1	0	0	2	1271.57	235	245	TRUE
			trmU "tRNA (5-methylaminomethyl-2-thiouridylate)-methyltransferase"	llmg_1725	42879.2	1	5	6	6	0.0191	0.172	EQGYDVIGVFMK	K	N	0.95	30.4	14.3	0	1	0	0	2	1401.67	38	49	TRUE
			trmU "tRNA (5-methylaminomethyl-2-thiouridylate)-methyltransferase"	llmg_1725	42879.2	1	5	6	6	0.0191	0.172	FLGEYLPAQPGK	K	M	0.95	28.1	14.1	0	1	0	0	2	1319.7	220	231	TRUE
			trmU "tRNA (5-methylaminomethyl-2-thiouridylate)-methyltransferase"	llmg_1725	42879.2	1	5	6	6	0.0191	0.172	MDNTNTQLMSGK	-	S	0.95	53.4	6.99	0	1	0	0	2	1371.59	1	12	TRUE
			trmU "tRNA (5-methylaminomethyl-2-thiouridylate)-methyltransferase"	llmg_1725	42879.2	1	5	6	6	0.0191	0.172	TDEDGTVHMLR	R	G	0.95	43.3	9.54	0	1	0	0	2	1289.58	144	154	TRUE
			trmU "tRNA (5-methylaminomethyl-2-thiouridylate)-methyltransferase"	llmg_1725	42879.2	1	5	6	6	0.0191	0.172	VVVGMSGGVDSSVTALLLK	R	E	0.95	44	13.4	0	1	1	0	2	1848.02	19	37	TRUE
			nusA "transcription elongation factor NusA"	llmg_1796	42875.6	1	4	4	4	0.0127	0.136	LAAHVTNSK	R	I	0.95	31.4	14	0	1	0	0	2	940.522	325	333	TRUE
			nusA "transcription elongation factor NusA"	llmg_1796	42875.6	1	4	4	4	0.0127	0.136	VIVQSHDENVDAIGTMVGAK	K	G	0.95	31	17	0	0	1	0	2	2099.04	235	254	TRUE
			nusA "transcription elongation factor NusA"	llmg_1796	42875.6	1	4	4	4	0.0127	0.136	VYVTDVVLTPK	K	G	0.95	41.9	14.3	0	1	0	0	2	1233.71	180	190	TRUE
			nusA "transcription elongation factor NusA"	llmg_1796	42875.6	1	4	4	4	0.0127	0.136	YKDEIIQGTVEK	R	V	0.95	58.1	16.9	0	1	0	0	2	1422.75	133	144	TRUE
			murD "UDP-N-acetylmuramoyl-L-alanyl-D-glutamate synthetase"	llmg_0912	49176.6	1	3	3	3	0.00955	0.102	GMVVFGQTADK	K	L	0.95	32.1	15.1	0	1	0	0	2	1168.57	374	384	TRUE
			murD "UDP-N-acetylmuramoyl-L-alanyl-D-glutamate synthetase"	llmg_0912	49176.6	1	3	3	3	0.00955	0.102	LNIPVFASQNVATALK	K	E	0.95	48.3	13.4	0	1	0	0	2	1685.96	392	407	TRUE
			murD "UDP-N-acetylmuramoyl-L-alanyl-D-glutamate synthetase"	llmg_0912	49176.6	1	3	3	3	0.00955	0.102	TTTTTLIADILNADGQSAK	K	L	0.95	36.5	16.4	0	0	1	0	2	1934.01	124	142	TRUE
			glmS "D-fructose-6-phosphate amidotransferase"	llmg_1516	65811.2	1	3	3	3	0.00955	0.0645	DSYTAELDLSDIGK	R	G	0.95	71.3	16	0	1	0	0	2	1526.72	234	247	TRUE
			glmS "D-fructose-6-phosphate amidotransferase"	llmg_1516	65811.2	1	3	3	3	0.00955	0.0645	EIDEQPAVMR	K	K	0.95	33.1	12	0	1	0	0	2	1203.57	257	266	TRUE
			glmS "D-fructose-6-phosphate amidotransferase"	llmg_1516	65811.2	1	3	3	3	0.00955	0.0645	LGIDVSGTSGIGHTR	K	W	0.95	32.6	16.3	0	0	1	0	2	1469.77	59	73	TRUE
			pgk "phosphoglycerate kinase"	llmg_0253	42090.4	0.999	2	2	2	0.00637	0.0553	IGVIENLLSK	K	A	0.95	40.3	14	0	1	0	0	2	1085.66	209	218	TRUE
			pgk "phosphoglycerate kinase"	llmg_0253	42090.4	0.999	2	2	2	0.00637	0.0553	VANAFAGYTEVK	K	E	0.95	43	18.3	0	1	0	0	2	1269.65	272	283	TRUE
628	0.03462	-1.7242	tufA "elongation factor Tu"	llmg_2050	43194	1	13	13	13	0.159	0.438	ADLVDDEELMELVEMEVR	K	D	0.95	65.8	11.1	0	1	0	0	2	2166.98	138	155	TRUE
			tufA "elongation factor Tu"	llmg_2050	43194	1	13	13	13	0.159	0.438	AVVTGIEMFR	K	K	0.95	46.5	14.9	0	1	0	0	2	1138.59	255	264	TRUE
			tufA "elongation factor Tu"	llmg_2050	43194	1	13	13	13	0.159	0.438	DTDKPLLLPVEDVFSITGR	R	G	0.95	31	12.8	0	0	1	0	2	2115.13	206	224	TRUE
			tufA "elongation factor Tu"	llmg_2050	43194	1	13	13	13	0.159	0.438	GITINTAHIEYETEKR	R	H	0.949	28	16	0	0	1	0	2	1874.96	60	75	TRUE
			tufA "elongation factor Tu"	llmg_2050	43194	1	13	13	13	0.159	0.438	HYAHIDAPGHADYVK	R	N	0.95	37.8	14.5	0	0	1	0	2	1693.81	76	90	TRUE
			tufA "elongation factor Tu"	llmg_2050	43194	1	13	13	13	0.159	0.438	KAVVTGIEMFR	K	K	0.95	36.5	17.4	0	1	0	0	2	1266.69	254	264	TRUE
			tufA "elongation factor Tu"	llmg_2050	43194	1	13	13	13	0.159	0.438	LFEGEVYVLSK	K	E	0.95	73.8	16.4	0	1	0	0	2	1283.69	305	315	TRUE
			tufA "elongation factor Tu"	llmg_2050	43194	1	13	13	13	0.159	0.438	NMITGAAQMDGAILVVAATDGPMPQTR	K	E	0.95	75.7	14.5	0	0	1	0	2	2777.33	91	117	TRUE
			tufA "elongation factor Tu"	llmg_2050	43194	1	13	13	13	0.159	0.438	TLTEGLAGDNVGALLR	K	G	0.95	70.2	16.4	0	1	0	0	2	1599.87	266	281	TRUE
			tufA "elongation factor Tu"	llmg_2050	43194	1	13	13	13	0.159	0.438	VEELMDIVDEYIPTPER	K	D	0.95	55.4	13	0	1	0	0	2	2063.99	189	205	TRUE
			tufA "elongation factor Tu"	llmg_2050	43194	1	13	13	13	0.159	0.438	VGDEVEIVGIK	K	E	0.95	50.1	16.5	0	1	0	0	2	1157.64	239	249	TRUE
			tufA "elongation factor Tu"	llmg_2050	43194	1	13	13	13	0.159	0.438	VGDEVEIVGIKEETK	K	K	0.95	59.5	14	0	1	0	0	2	1644.87	239	253	TRUE
			tufA "elongation factor Tu"	llmg_2050	43194	1	13	13	13	0.159	0.438	YLIVFLNK	K	A	0.95	31.2	7.78	0	1	0	0	2	1009.61	130	137	TRUE
			pepQ "proline dipeptidase"	llmg_0774	39942.5	1	11	14	14	0.171	0.461	AANPHGGPENVEIQENK	R	L	0.95	47.8	15.9	0	1	1	0	2	1803.86	200	216	TRUE
			pepQ "proline dipeptidase"	llmg_0774	39942.5	1	11	14	14	0.171	0.461	AGYGEYFNHR	K	L	0.95	59.2	6.02	0	1	0	0	2	1213.54	284	293	TRUE
			pepQ "proline dipeptidase"	llmg_0774	39942.5	1	11	14	14	0.171	0.461	AQFGDINFVNLTPLIER	K	M	0.95	69	12.8	0	1	1	0	2	1947.03	114	130	TRUE
			pepQ "proline dipeptidase"	llmg_0774	39942.5	1	11	14	14	0.171	0.461	DSNPMLFTPALEVEK	R	A	0.95	52	14.8	0	1	0	0	2	1706.83	49	63	TRUE
			pepQ "proline dipeptidase"	llmg_0774	39942.5	1	11	14	14	0.171	0.461	EAQQAAMDFIKPGVTAQEVDAVAR	K	D	0.95	66.7	14.1	0	0	1	0	2	2561.27	255	278	TRUE
			pepQ "proline dipeptidase"	llmg_0774	39942.5	1	11	14	14	0.171	0.461	IAGLMIFR	R	D	0.95	60.4	15.4	0	1	0	0	2	936.534	41	48	TRUE
			pepQ "proline dipeptidase"	llmg_0774	39942.5	1	11	14	14	0.171	0.461	LLLFDLGVMSGGYASDATR	K	T	0.95	106	15.3	0	1	0	0	2	2002	217	235	TRUE
			pepQ "proline dipeptidase"	llmg_0774	39942.5	1	11	14	14	0.171	0.461	MGVPQMSFDTLVLSGAR	R	A	0.95	69.6	15.1	0	1	0	0	2	1840.89	183	199	TRUE
			pepQ "proline dipeptidase"	llmg_0774	39942.5	1	11	14	14	0.171	0.461	NGVTESDIVAK	R	I	0.95	32.1	16.4	0	1	0	0	2	1132.59	165	175	TRUE
			pepQ "proline dipeptidase"	llmg_0774	39942.5	1	11	14	14	0.171	0.461	SIAVEFSDIPLAK	K	T	0.95	72.3	16.2	0	1	0	0	2	1389.76	96	108	TRUE
			pepQ "proline dipeptidase"	llmg_0774	39942.5	1	11	14	14	0.171	0.461	TIAIGQPNDFDAEIHK	R	I	0.95	51.6	16.5	0	1	1	0	2	1768.89	236	251	TRUE
			pgk "phosphoglycerate kinase"	llmg_0253	42090.4	1	5	5	5	0.061	0.143	AVLFSHLGR	R	V	0.95	30.9	14.3	0	1	0	0	2	999.574	54	62	TRUE
			pgk "phosphoglycerate kinase"	llmg_0253	42090.4	1	5	5	5	0.061	0.143	IGVIENLLSK	K	A	0.95	56.1	14	0	1	0	0	2	1085.66	209	218	TRUE
			pgk "phosphoglycerate kinase"	llmg_0253	42090.4	1	5	5	5	0.061	0.143	TIADYNTQLEGAK	K	T	0.95	32.6	17.5	0	1	0	0	2	1423.71	303	315	TRUE
			pgk "phosphoglycerate kinase"	llmg_0253	42090.4	1	5	5	5	0.061	0.143	VANAFAGYTEVK	K	E	0.95	41.5	18.3	0	1	0	0	2	1269.65	272	283	TRUE
			pgk "phosphoglycerate kinase"	llmg_0253	42090.4	1	5	5	5	0.061	0.143	VIIGGGMAYTFLK	K	A	0.95	30.5	16.8	0	1	0	0	2	1385.75	222	234	TRUE
			ftsZ "cell division protein FtsZ"	llmg_2060	44243.7	1	3	3	3	0.0366	0.0979	GDALMGIGVATGEER	K	V	0.95	46.7	13.8	0	1	0	0	2	1491.71	223	237	TRUE
			ftsZ "cell division protein FtsZ"	llmg_2060	44243.7	1	3	3	3	0.0366	0.0979	SYFATEGIEALR	R	A	0.95	51.4	14.3	0	1	0	0	2	1356.68	145	156	TRUE
			ftsZ "cell division protein FtsZ"	llmg_2060	44243.7	1	3	3	3	0.0366	0.0979	VIGVGGGGGNAINR	K	M	0.95	59.5	15.2	0	1	0	0	2	1240.68	17	30	TRUE
652	0.04092	-1.693	pepQ "proline dipeptidase"	llmg_0774	39942.5	1	12	14	21	0.157	0.475	AANPHGGPENVEIQENK	R	L	0.95	52.3	15.9	0	1	2	0	2	1803.86	200	216	TRUE
			pepQ "proline dipeptidase"	llmg_0774	39942.5	1	12	14	21	0.157	0.475	AGYGEYFNHR	K	L	0.95	50	6.02	0	1	0	0	2	1213.54	284	293	TRUE
			pepQ "proline dipeptidase"	llmg_0774	39942.5	1	12	14	21	0.157	0.475	AQFGDINFVNLTPLIER	K	M	0.95	94.8	12.8	0	3	1	0	2	1947.03	114	130	TRUE
			pepQ "proline dipeptidase"	llmg_0774	39942.5	1	12	14	21	0.157	0.475	DSNPMLFTPALEVEK	R	A	0.95	72.2	14.6	0	2	0	0	2	1690.84	49	63	TRUE
			pepQ "proline dipeptidase"	llmg_0774	39942.5	1	12	14	21	0.157	0.475	EAQQAAMDFIKPGVTAQEVDAVAR	K	D	0.95	57	14.5	0	0	2	0	2	2561.27	255	278	TRUE
			pepQ "proline dipeptidase"	llmg_0774	39942.5	1	12	14	21	0.157	0.475	IAGDFADK	K	C	0.95	42.5	17.3	0	1	0	0	2	836.416	145	152	TRUE
			pepQ "proline dipeptidase"	llmg_0774	39942.5	1	12	14	21	0.157	0.475	IAGLMIFR	R	D	0.95	38.7	14.5	0	1	0	0	2	936.534	41	48	TRUE
			pepQ "proline dipeptidase"	llmg_0774	39942.5	1	12	14	21	0.157	0.475	ISAFLNDK	R	E	0.95	28.1	17.4	0	1	0	0	2	907.489	7	14	TRUE
			pepQ "proline dipeptidase"	llmg_0774	39942.5	1	12	14	21	0.157	0.475	LLLFDLGVMSGGYASDATR	K	T	0.95	99.1	15.1	0	1	0	0	2	2002	217	235	TRUE
			pepQ "proline dipeptidase"	llmg_0774	39942.5	1	12	14	21	0.157	0.475	MGVPQMSFDTLVLSGAR	R	A	0.95	56.5	15.3	0	3	0	0	2	1808.9	183	199	TRUE
			pepQ "proline dipeptidase"	llmg_0774	39942.5	1	12	14	21	0.157	0.475	SIAVEFSDIPLAK	K	T	0.95	66.8	16.2	0	1	0	0	2	1389.76	96	108	TRUE
			pepQ "proline dipeptidase"	llmg_0774	39942.5	1	12	14	21	0.157	0.475	TIAIGQPNDFDAEIHK	R	I	0.95	55.4	16.5	0	1	0	0	2	1768.89	236	251	TRUE
			pgk "phosphoglycerate kinase"	llmg_0253	42090.4	1	12	12	12	0.0896	0.332	AVLFSHLGR	R	V	0.95	30.9	14.3	0	1	0	0	2	999.574	54	62	TRUE
			pgk "phosphoglycerate kinase"	llmg_0253	42090.4	1	12	12	12	0.0896	0.332	DGEILLVENTR	K	F	0.95	57.2	14.9	0	1	0	0	2	1258.66	109	119	TRUE
			pgk "phosphoglycerate kinase"	llmg_0253	42090.4	1	12	12	12	0.0896	0.332	ETADQNIPAGFMGLDVANK	K	T	0.95	38.3	13.6	0	1	0	0	2	2006.95	284	302	TRUE
			pgk "phosphoglycerate kinase"	llmg_0253	42090.4	1	12	12	12	0.0896	0.332	FEDIDGK	R	K	0.95	26.1	14.3	0	1	0	0	2	823.384	120	126	TRUE
			pgk "phosphoglycerate kinase"	llmg_0253	42090.4	1	12	12	12	0.0896	0.332	FEDIDGKK	R	E	0.95	30.5	16.4	0	1	0	0	2	951.479	120	127	TRUE
			pgk "phosphoglycerate kinase"	llmg_0253	42090.4	1	12	12	12	0.0896	0.332	GAELEAAINELK	R	D	0.95	49.1	15.6	0	1	0	0	2	1257.67	97	108	TRUE
			pgk "phosphoglycerate kinase"	llmg_0253	42090.4	1	12	12	12	0.0896	0.332	IGVIENLLSK	K	A	0.95	52	14	0	1	0	0	2	1085.66	209	218	TRUE
			pgk "phosphoglycerate kinase"	llmg_0253	42090.4	1	12	12	12	0.0896	0.332	TIADYNTQLEGAK	K	T	0.95	52.5	17.5	0	1	0	0	2	1423.71	303	315	TRUE
			pgk "phosphoglycerate kinase"	llmg_0253	42090.4	1	12	12	12	0.0896	0.332	VANAFAGYTEVK	K	E	0.95	47.9	18.3	0	1	0	0	2	1269.65	272	283	TRUE
			pgk "phosphoglycerate kinase"	llmg_0253	42090.4	1	12	12	12	0.0896	0.332	VDFNVPIKDGVITNDNR	R	I	0.95	46	14.1	0	0	1	0	2	1915.99	20	36	TRUE
			pgk "phosphoglycerate kinase"	llmg_0253	42090.4	1	12	12	12	0.0896	0.332	VIIGGGMAYTFLK	K	A	0.95	57	16.9	0	1	0	0	2	1385.75	222	234	TRUE
			pgk "phosphoglycerate kinase"	llmg_0253	42090.4	1	12	12	12	0.0896	0.332	YILEQGGR	K	A	0.95	28.4	17.1	0	1	0	0	2	935.495	46	53	TRUE
			tufA "elongation factor Tu"	llmg_2050	43194	1	5	5	5	0.0373	0.162	AVVTGIEMFR	K	K	0.95	37.4	15.1	0	1	0	0	2	1138.59	255	264	TRUE
			tufA "elongation factor Tu"	llmg_2050	43194	1	5	5	5	0.0373	0.162	DTDKPLLLPVEDVFSITGR	R	G	0.95	34.7	13.4	0	0	1	0	2	2115.13	206	224	TRUE
			tufA "elongation factor Tu"	llmg_2050	43194	1	5	5	5	0.0373	0.162	LFEGEVYVLSK	K	E	0.95	50.5	15.4	0	1	0	0	2	1283.69	305	315	TRUE
			tufA "elongation factor Tu"	llmg_2050	43194	1	5	5	5	0.0373	0.162	TLTEGLAGDNVGALLR	K	G	0.95	59.3	16.1	0	1	0	0	2	1599.87	266	281	TRUE
			tufA "elongation factor Tu"	llmg_2050	43194	1	5	5	5	0.0373	0.162	YLIVFLNK	K	A	0.95	33.4	7.78	0	1	0	0	2	1009.61	130	137	TRUE
			eno "phosphopyruvate hydratase"	llmg_0617	46895.4	1	4	4	4	0.0299	0.122	AMIALDGTENK	R	G	0.95	44.9	15.1	0	1	0	0	2	1178.57	93	103	TRUE
			eno "phosphopyruvate hydratase"	llmg_0617	46895.4	1	4	4	4	0.0299	0.122	FDGTEDGVETILK	K	A	0.95	59	15.9	0	1	0	0	2	1423.7	212	224	TRUE
			eno "phosphopyruvate hydratase"	llmg_0617	46895.4	1	4	4	4	0.0299	0.122	GLETAVGDEGGFAPK	R	F	0.95	53.2	15.3	0	1	0	0	2	1447.71	197	211	TRUE
			eno "phosphopyruvate hydratase"	llmg_0617	46895.4	1	4	4	4	0.0299	0.122	VQLVGDDFFVTNTK	K	Y	0.95	59.8	14.8	0	1	0	0	2	1582.81	312	325	TRUE
			ftsZ "cell division protein FtsZ"	llmg_2060	44243.7	1	4	4	4	0.0299	0.131	EDADEALGLQPESR	K	R	0.95	54	11.8	0	1	0	0	2	1529.71	319	332	TRUE
			ftsZ "cell division protein FtsZ"	llmg_2060	44243.7	1	4	4	4	0.0299	0.131	GDALMGIGVATGEER	K	V	0.95	49.3	13.8	0	1	0	0	2	1491.71	223	237	TRUE
			ftsZ "cell division protein FtsZ"	llmg_2060	44243.7	1	4	4	4	0.0299	0.131	GLGAGAQPEVGK	R	R	0.95	56.4	14.5	0	1	0	0	2	1083.58	69	80	TRUE
			ftsZ "cell division protein FtsZ"	llmg_2060	44243.7	1	4	4	4	0.0299	0.131	VIGVGGGGGNAINR	K	M	0.95	66.2	15.2	0	1	0	0	2	1240.68	17	30	TRUE
			carB "carbamoyl phosphate synthase large subunit"	llmg_1089	117415	1	3	3	3	0.0224	0.0273	DASLNIIR	R	A	0.95	33.1	20.3	0	1	0	0	2	901.511	266	273	TRUE
			carB "carbamoyl phosphate synthase large subunit"	llmg_1089	117415	1	3	3	3	0.0224	0.0273	ILGTQVEDLDR	K	A	0.95	49.9	14.8	0	1	0	0	2	1258.66	653	663	TRUE
			carB "carbamoyl phosphate synthase large subunit"	llmg_1089	117415	1	3	3	3	0.0224	0.0273	LSAIDQAEDR	K	E	0.95	39.1	13.6	0	1	0	0	2	1117.55	120	129	TRUE
			pepT "peptidase T"	llmg_1994	45929.5	1	2	2	2	0.0149	0.046	AVDTLLEIIR	K	L	0.95	43.9	14.3	0	1	0	0	2	1142.68	397	406	TRUE
			pepT "peptidase T"	llmg_1994	45929.5	1	2	2	2	0.0149	0.046	MNAELGQNR	K	V	0.95	46.4	10	0	1	0	0	2	1048.48	306	314	TRUE
770	0.001588	-1.7138	llmg_0196 "prenyl transferase"	llmg_0196	36375.1	1	13	15	16	0.0755	0.5	DVQALMIER	K	L	0.95	47.2	16.5	0	1	0	0	2	1090.56	17	25	TRUE
			llmg_0196 "prenyl transferase"	llmg_0196	36375.1	1	13	15	16	0.0755	0.5	EVNEAAIAPYLEAPEK	R	L	0.95	52.6	14	0	1	1	0	2	1743.88	250	265	TRUE
			llmg_0196 "prenyl transferase"	llmg_0196	36375.1	1	13	15	16	0.0755	0.5	GMPSVESQFGK	R	D	0.95	42	11.8	0	1	0	0	2	1182.55	99	109	TRUE
			llmg_0196 "prenyl transferase"	llmg_0196	36375.1	1	13	15	16	0.0755	0.5	IAASLEMLHSATLIHDDIIDDSPLR	K	R	0.95	30.9	13.2	0	0	1	0	2	2762.4	73	97	TRUE
			llmg_0196 "prenyl transferase"	llmg_0196	36375.1	1	13	15	16	0.0755	0.5	ILQGELTQMQSAFDK	R	N	0.95	81.4	15.4	0	2	0	0	2	1708.86	147	161	TRUE
			llmg_0196 "prenyl transferase"	llmg_0196	36375.1	1	13	15	16	0.0755	0.5	ILQGELTQMQSAFDKNNTAR	R	R	0.95	41.6	13.6	0	0	1	0	2	2281.12	147	166	TRUE
			llmg_0196 "prenyl transferase"	llmg_0196	36375.1	1	13	15	16	0.0755	0.5	INNQEIEVALQK	K	F	0.95	70.3	12.8	0	1	1	0	2	1398.76	28	39	TRUE
			llmg_0196 "prenyl transferase"	llmg_0196	36375.1	1	13	15	16	0.0755	0.5	LKDVQALMIER	K	L	0.95	45.3	16.9	0	1	0	0	2	1331.74	15	25	TRUE
			llmg_0196 "prenyl transferase"	llmg_0196	36375.1	1	13	15	16	0.0755	0.5	LTELALNEIK	R	K	0.95	62.7	13.2	0	1	0	0	2	1143.66	294	303	TRUE
			llmg_0196 "prenyl transferase"	llmg_0196	36375.1	1	13	15	16	0.0755	0.5	MLTFWQDYPEIQNK	-	L	0.95	73.1	12	0	1	0	0	2	1828.86	1	14	TRUE
			llmg_0196 "prenyl transferase"	llmg_0196	36375.1	1	13	15	16	0.0755	0.5	MVRPALFLLFAGIVPNGSK	K	D	0.95	44.4	11.1	0	0	1	0	2	2046.16	47	65	TRUE
			llmg_0196 "prenyl transferase"	llmg_0196	36375.1	1	13	15	16	0.0755	0.5	QGIYTLPLLLAR	R	E	0.95	31.6	6.02	0	1	0	0	2	1357.82	238	249	TRUE
			llmg_0196 "prenyl transferase"	llmg_0196	36375.1	1	13	15	16	0.0755	0.5	QILEEATQILLER	R	N	0.95	71.3	15.3	0	1	0	0	2	1555.87	312	324	TRUE
			llmg_0427 "phosphomevalonate kinase"	llmg_0427	36329.7	1	11	13	15	0.0708	0.389	ELALALNLLNSYPELAAK	K	I	0.95	115	14.5	0	1	0	0	2	1943.09	268	285	TRUE
			llmg_0427 "phosphomevalonate kinase"	llmg_0427	36329.7	1	11	13	15	0.0708	0.389	ISGAGFGENLILFAQNSMAIAEVQK	K	K	0.95	59.7	14.8	0	0	1	0	2	2624.34	286	310	TRUE
			llmg_0427 "phosphomevalonate kinase"	llmg_0427	36329.7	1	11	13	15	0.0708	0.389	KLSEYGINLEEFK	K	I	0.95	46.8	16.4	0	1	1	0	2	1569.82	311	323	TRUE
			llmg_0427 "phosphomevalonate kinase"	llmg_0427	36329.7	1	11	13	15	0.0708	0.389	LFFAGEYAVTK	K	E	0.95	57.2	16.6	0	2	0	0	2	1245.65	16	26	TRUE
			llmg_0427 "phosphomevalonate kinase"	llmg_0427	36329.7	1	11	13	15	0.0708	0.389	LSENQLLLLENIPEGYMTK	K	E	0.95	62.6	15.2	0	1	1	0	2	2221.14	249	267	TRUE
			llmg_0427 "phosphomevalonate kinase"	llmg_0427	36329.7	1	11	13	15	0.0708	0.389	LSEYGINLEEFK	K	I	0.95	74.7	15.2	0	1	0	0	2	1441.72	312	323	TRUE
			llmg_0427 "phosphomevalonate kinase"	llmg_0427	36329.7	1	11	13	15	0.0708	0.389	NTLSAADSSK	K	K	0.95	42.6	16.5	0	1	0	0	2	993.485	86	95	TRUE
			llmg_0427 "phosphomevalonate kinase"	llmg_0427	36329.7	1	11	13	15	0.0708	0.389	NTLSAADSSKK	K	E	0.95	33.2	16.3	0	1	0	0	2	1121.58	86	96	TRUE
			llmg_0427 "phosphomevalonate kinase"	llmg_0427	36329.7	1	11	13	15	0.0708	0.389	SDLGFGENK	R	K	0.95	52.2	16.2	0	1	0	0	2	966.453	115	123	TRUE
			llmg_0427 "phosphomevalonate kinase"	llmg_0427	36329.7	1	11	13	15	0.0708	0.389	TNVGLADFEFSLTK	K	I	0.95	93.7	16.1	0	2	0	0	2	1541.79	55	68	TRUE
			llmg_0427 "phosphomevalonate kinase"	llmg_0427	36329.7	1	11	13	15	0.0708	0.389	TYVVQTGK	K	A	0.95	33.5	14.5	0	1	0	0	2	895.489	199	206	TRUE
			rplB "50S ribosomal protein L2"	llmg_2380	29572.6	1	5	5	5	0.0236	0.301	ATIGVVGNEQQSLINLGK	R	A	0.95	68.8	14.6	0	1	0	0	2	1841.01	190	207	TRUE
			rplB "50S ribosomal protein L2"	llmg_2380	29572.6	1	5	5	5	0.0236	0.301	GLEVGMTVVSGPDADIK	K	V	0.95	76.4	14.3	0	1	0	0	2	1703.85	109	125	TRUE
			rplB "50S ribosomal protein L2"	llmg_2380	29572.6	1	5	5	5	0.0236	0.301	GSVMNPNDHPHGGGEGR	R	Q	0.95	37.2	9.54	0	0	1	0	2	1733.74	222	238	TRUE
			rplB "50S ribosomal protein L2"	llmg_2380	29572.6	1	5	5	5	0.0236	0.301	NMTGSDFAEITTSTPEK	R	S	0.95	78.5	9.03	0	1	0	0	2	1844.82	15	31	TRUE
			rplB "50S ribosomal protein L2"	llmg_2380	29572.6	1	5	5	5	0.0236	0.301	SAGASAQVLGSEGK	R	Y	0.95	93	15.3	0	1	0	0	2	1261.64	157	170	TRUE
			panE "2-dehydropantoate 2-reductase"	llmg_1131	34345.3	1	4	4	4	0.0189	0.154	ITIAGAGAMGSR	R	F	0.95	39.4	14.8	0	1	0	0	2	1120.58	3	14	TRUE
			panE "2-dehydropantoate 2-reductase"	llmg_1131	34345.3	1	4	4	4	0.0189	0.154	LTEIDYINGAVSR	R	K	0.95	68.8	17.1	0	1	0	0	2	1450.75	271	283	TRUE
			panE "2-dehydropantoate 2-reductase"	llmg_1131	34345.3	1	4	4	4	0.0189	0.154	MLQDIKPLIAEHTK	K	V	0.95	31.2	13.6	0	0	1	0	2	1652.9	86	99	TRUE
			panE "2-dehydropantoate 2-reductase"	llmg_1131	34345.3	1	4	4	4	0.0189	0.154	TDLIILFTK	K	A	0.95	43.6	9.03	0	1	0	0	2	1063.64	71	79	TRUE
			trpS "tryptophanyl-tRNA synthetase II"	llmg_0079	38102.6	1	2	2	2	0.00943	0.0733	AEAVASQTLDEVK	K	N	0.95	69.2	17	0	1	0	0	2	1360.7	320	332	TRUE
			trpS "tryptophanyl-tRNA synthetase II"	llmg_0079	38102.6	1	2	2	2	0.00943	0.0733	AQYQAGGLGDVK	K	T	0.95	37.1	16.9	0	1	0	0	2	1206.61	268	279	TRUE
			galU "UDP--glucose-1-phosphate uridylyltransferase"	llmg_1113	34985.4	1	2	2	2	0.00943	0.105	VEEAPSDLAIIGR	K	Y	0.95	34.2	13.8	0	1	0	0	2	1369.73	206	218	TRUE
			galU "UDP--glucose-1-phosphate uridylyltransferase"	llmg_1113	34985.4	1	2	2	2	0.00943	0.105	VPHEDVDKYGVIDPNGEVSK	K	G	0.95	35.2	15.9	0	0	1	0	2	2197.08	173	192	TRUE
			mvaD "diphosphomevalonate decarboxylase"	llmg_0426	34974.3	1	2	2	2	0.00943	0.101	DIGLSMIVAEISSEK	K	K	0.95	41.2	16	0	1	0	0	2	1607.82	167	181	TRUE
			mvaD "diphosphomevalonate decarboxylase"	llmg_0426	34974.3	1	2	2	2	0.00943	0.101	VGLIAQDNALGMHEQNR	K	L	0.95	43.8	14	0	0	1	0	2	1881.92	225	241	TRUE
772	0.006439	-1.6867	gntZ "6-phosphogluconate dehydrogenase-like protein"	llmg_2469	32978.7	1	11	11	14	0.159	0.402	AISTENGYLYTGK	K	L	0.95	74.6	15.6	0	1	0	0	2	1416.7	154	166	TRUE
			gntZ "6-phosphogluconate dehydrogenase-like protein"	llmg_2469	32978.7	1	11	11	14	0.159	0.402	ATNSTIELLSEK	K	L	0.95	59.1	17	0	1	0	0	2	1305.69	74	85	TRUE
			gntZ "6-phosphogluconate dehydrogenase-like protein"	llmg_2469	32978.7	1	11	11	14	0.159	0.402	FFDVGTSGGMAGAR	K	Q	0.95	78.1	9.54	0	2	0	0	2	1388.63	117	130	TRUE
			gntZ "6-phosphogluconate dehydrogenase-like protein"	llmg_2469	32978.7	1	11	11	14	0.159	0.402	FGMIGLGK	K	M	0.95	49	16.4	0	2	0	0	2	822.455	3	10	TRUE
			gntZ "6-phosphogluconate dehydrogenase-like protein"	llmg_2469	32978.7	1	11	11	14	0.159	0.402	IIWLMLPAGK	K	A	0.95	28.6	16.6	0	1	0	0	2	1157.68	64	73	TRUE
			gntZ "6-phosphogluconate dehydrogenase-like protein"	llmg_2469	32978.7	1	11	11	14	0.159	0.402	LSAADILIDGGNSNYK	K	D	0.95	81.8	17.1	0	1	0	0	2	1650.83	86	101	TRUE
			gntZ "6-phosphogluconate dehydrogenase-like protein"	llmg_2469	32978.7	1	11	11	14	0.159	0.402	LSAADILIDGGNSNYKDNLEQNK	K	L	0.95	63.5	13.4	0	0	1	0	2	2492.23	86	108	TRUE
			gntZ "6-phosphogluconate dehydrogenase-like protein"	llmg_2469	32978.7	1	11	11	14	0.159	0.402	MGMNLVK	K	N	0.95	28.9	14.5	0	1	0	0	2	824.401	11	17	TRUE
			gntZ "6-phosphogluconate dehydrogenase-like protein"	llmg_2469	32978.7	1	11	11	14	0.159	0.402	NGFGGHEVEQK	R	-	0.95	34.2	10.4	0	1	0	0	2	1201.56	291	301	TRUE
			gntZ "6-phosphogluconate dehydrogenase-like protein"	llmg_2469	32978.7	1	11	11	14	0.159	0.402	SIDELLTELSEPK	K	I	0.95	34.4	14.6	0	1	0	0	2	1473.77	51	63	TRUE
			gntZ "6-phosphogluconate dehydrogenase-like protein"	llmg_2469	32978.7	1	11	11	14	0.159	0.402	SLQEDTMTGK	R	V	0.95	35.8	12.3	0	2	0	0	2	1125.51	275	284	TRUE
			glk "glucokinase"	llmg_2299	33739.1	1	8	10	10	0.114	0.282	AAIDNGDEVTSK	K	D	0.95	54.8	14.6	0	1	0	0	2	1219.58	213	224	TRUE
			glk "glucokinase"	llmg_2299	33739.1	1	8	10	10	0.114	0.282	EKVETYFNK	R	Y	0.95	32	15.4	0	1	0	0	2	1157.58	279	287	TRUE
			glk "glucokinase"	llmg_2299	33739.1	1	8	10	10	0.114	0.282	FAEEYEGDSTIK	K	A	0.95	57.1	9.03	0	1	0	0	2	1388.62	201	212	TRUE
			glk "glucokinase"	llmg_2299	33739.1	1	8	10	10	0.114	0.282	FGILTLTGEVQDK	K	W	0.95	76.3	15.7	0	1	0	0	2	1420.77	18	30	TRUE
			glk "glucokinase"	llmg_2299	33739.1	1	8	10	10	0.114	0.282	HIVPDIIQSINHR	K	L	0.95	56	12.3	0	0	1	0	2	1541.86	43	55	TRUE
			glk "glucokinase"	llmg_2299	33739.1	1	8	10	10	0.114	0.282	IIGIDLGGTSIK	K	F	0.95	66.1	14.8	0	1	0	0	2	1186.71	6	17	TRUE
			glk "glucokinase"	llmg_2299	33739.1	1	8	10	10	0.114	0.282	KFAEEYEGDSTIK	R	A	0.95	46.1	12.8	0	1	1	0	2	1516.72	200	212	TRUE
			glk "glucokinase"	llmg_2299	33739.1	1	8	10	10	0.114	0.282	LAVLGNDAGIIGAASLALK	K	F	0.95	101	6.02	0	1	1	0	2	1767.04	301	319	TRUE
			llmg_0765 "putative hydrolase"	llmg_0765	29175.6	1	5	5	5	0.0568	0.241	ALAFFDLDGTLLNSQSK	K	L	0.95	73.4	14.9	0	1	0	0	2	1839.95	9	25	TRUE
			llmg_0765 "putative hydrolase"	llmg_0765	29175.6	1	5	5	5	0.0568	0.241	EVLNFTGQTFAFGDGR	K	N	0.95	59.6	16.2	0	1	0	0	2	1758.85	198	213	TRUE
			llmg_0765 "putative hydrolase"	llmg_0765	29175.6	1	5	5	5	0.0568	0.241	GTGINHVK	K	E	0.95	30.3	13.6	0	1	0	0	2	825.458	190	197	TRUE
			llmg_0765 "putative hydrolase"	llmg_0765	29175.6	1	5	5	5	0.0568	0.241	LDQEVIEGIHR	K	I	0.95	41.9	16.7	0	1	0	0	2	1308.69	26	36	TRUE
			llmg_0765 "putative hydrolase"	llmg_0765	29175.6	1	5	5	5	0.0568	0.241	TAMGNAVPELK	K	E	0.95	35.6	15.9	0	1	0	0	2	1146.58	226	236	TRUE
			pepM "methionine aminopeptidase"	llmg_0577	31780.9	1	4	4	4	0.0455	0.194	DGPVILTSQGEER	K	T	0.95	48	15.8	0	1	0	0	2	1400.7	270	282	TRUE
			pepM "methionine aminopeptidase"	llmg_0577	31780.9	1	4	4	4	0.0455	0.194	IGDIGAAIQEYAESR	R	G	0.95	98.1	17.6	0	1	0	0	2	1592.79	174	188	TRUE
			pepM "methionine aminopeptidase"	llmg_0577	31780.9	1	4	4	4	0.0455	0.194	ILADIHIGLR	K	D	0.95	31.5	9.54	0	1	0	0	2	1120.68	19	28	TRUE
			pepM "methionine aminopeptidase"	llmg_0577	31780.9	1	4	4	4	0.0455	0.194	VDMVLGLVEDGSVDVSK	K	L	0.95	55.2	15.1	0	1	0	0	2	1777.89	98	114	TRUE
			tsf "elongation factor Ts"	llmg_2429	36722.1	1	4	4	4	0.0455	0.146	AETDFAAEVEAAK	K	A	0.95	54.4	14	0	1	0	0	2	1351.64	327	339	TRUE
			tsf "elongation factor Ts"	llmg_2429	36722.1	1	4	4	4	0.0455	0.146	IGVISVIEGADETLAK	K	Q	0.95	57.9	14.9	0	1	0	0	2	1614.9	162	177	TRUE
			tsf "elongation factor Ts"	llmg_2429	36722.1	1	4	4	4	0.0455	0.146	SQLTEEVLAAAK	K	A	0.95	63.8	16.7	0	1	0	0	2	1259.68	236	247	TRUE
			tsf "elongation factor Ts"	llmg_2429	36722.1	1	4	4	4	0.0455	0.146	TVEAFLESK	K	G	0.95	30.2	16.5	0	1	0	0	2	1023.54	300	308	TRUE
808	0.006071	-1.62	glyQ "glycyl-tRNA synthetase subunit alpha"	llmg_1478	36038.5	1	10	10	10	0.156	0.41	FAFEESNQELLLK	K	L	0.95	71.6	16	0	1	0	0	2	1567.8	204	216	TRUE
			glyQ "glycyl-tRNA synthetase subunit alpha"	llmg_1478	36038.5	1	10	10	10	0.156	0.41	GAVSVTER	R	A	0.95	44.9	15.7	0	1	0	0	2	818.437	255	262	TRUE
			glyQ "glycyl-tRNA synthetase subunit alpha"	llmg_1478	36038.5	1	10	10	10	0.156	0.41	GLVHPAYDYILK	K	S	0.95	31.7	16.2	0	1	0	0	2	1388.76	232	243	TRUE
			glyQ "glycyl-tRNA synthetase subunit alpha"	llmg_1478	36038.5	1	10	10	10	0.156	0.41	IVEGEEK	K	-	0.95	31.9	17	0	1	0	0	2	803.415	311	317	TRUE
			glyQ "glycyl-tRNA synthetase subunit alpha"	llmg_1478	36038.5	1	10	10	10	0.156	0.41	LFGEYEQEALDLLDK	K	G	0.95	74.9	16.4	0	1	0	0	2	1782.88	217	231	TRUE
			glyQ "glycyl-tRNA synthetase subunit alpha"	llmg_1478	36038.5	1	10	10	10	0.156	0.41	LFQHHQFQVVLKPSPK	R	N	0.95	35.8	6.02	0	0	1	0	2	1933.08	76	91	TRUE
			glyQ "glycyl-tRNA synthetase subunit alpha"	llmg_1478	36038.5	1	10	10	10	0.156	0.41	QGANLMQAYDNEVGAGTMSPYTFLR	K	S	0.95	51.8	8.45	0	0	1	0	2	2766.25	22	46	TRUE
			glyQ "glycyl-tRNA synthetase subunit alpha"	llmg_1478	36038.5	1	10	10	10	0.156	0.41	SNGPEPWGAAYVQPSR	R	R	0.95	38.8	14.6	0	1	0	0	2	1715.81	47	62	TRUE
			glyQ "glycyl-tRNA synthetase subunit alpha"	llmg_1478	36038.5	1	10	10	10	0.156	0.41	SSHTFNLLDAR	K	G	0.95	59	14.9	0	1	0	0	2	1260.63	244	254	TRUE
			glyQ "glycyl-tRNA synthetase subunit alpha"	llmg_1478	36038.5	1	10	10	10	0.156	0.41	YGENPNR	R	L	0.95	35.2	11.1	0	1	0	0	2	849.385	69	75	TRUE
			pyrB "aspartate carbamoyltransferase catalytic subunit"	llmg_0893	34541	1	5	5	5	0.0781	0.203	DVEIADSLVESPQSR	R	I	0.95	44.9	13.6	0	1	0	0	2	1644.81	270	284	TRUE
			pyrB "aspartate carbamoyltransferase catalytic subunit"	llmg_0893	34541	1	5	5	5	0.0781	0.203	HDSGESFSK	R	E	0.95	26.4	8.45	0	1	0	0	2	993.428	230	238	TRUE
			pyrB "aspartate carbamoyltransferase catalytic subunit"	llmg_0893	34541	1	5	5	5	0.0781	0.203	IAISGDLTHSR	K	V	0.95	40.7	15.3	0	1	0	0	2	1169.63	162	172	TRUE
			pyrB "aspartate carbamoyltransferase catalytic subunit"	llmg_0893	34541	1	5	5	5	0.0781	0.203	LGLDVLEFDAQASSISK	K	G	0.95	72.9	16.4	0	1	0	0	2	1792.93	71	87	TRUE
			pyrB "aspartate carbamoyltransferase catalytic subunit"	llmg_0893	34541	1	5	5	5	0.0781	0.203	MAILEAILAGK	R	K	0.95	48.7	14.8	0	1	0	0	2	1145.66	297	307	TRUE
			prsB "ribose-phosphate pyrophosphokinase"	llmg_2046	35329.3	1	3	3	3	0.0469	0.125	EILVTDSVVTEHR	K	K	0.95	45.6	14.8	0	1	0	0	2	1497.79	271	283	TRUE
			prsB "ribose-phosphate pyrophosphokinase"	llmg_2046	35329.3	1	3	3	3	0.0469	0.125	LFALNSNPGLAEK	K	I	0.95	41.7	17.9	0	1	0	0	2	1373.74	10	22	TRUE
			prsB "ribose-phosphate pyrophosphokinase"	llmg_2046	35329.3	1	3	3	3	0.0469	0.125	NGLFGDDVIVVAPK	K	N	0.95	38.3	15.8	0	1	0	0	2	1443.79	162	175	TRUE
			llmg_0106 "similar to ABC transporter (ATP-binding protein)"	llmg_0106	58289.1	1	2	2	2	0.0312	0.0368	AIFEDVSFR	R	L	0.95	31	14.6	0	1	0	0	2	1083.55	17	25	TRUE
			llmg_0106 "similar to ABC transporter (ATP-binding protein)"	llmg_0106	58289.1	1	2	2	2	0.0312	0.0368	YSMGYAEFER	R	V	0.95	27.9	3.01	0	1	0	0	2	1268.53	239	248	TRUE
829	0.001416	-1.57	pyrF "orotidine 5'-phosphate decarboxylase"	llmg_1107	26151.2	1	3	4	4	0.0392	0.224	IMTSLEESVINYAQK	K	T	0.95	77.8	15.8	0	1	1	0	2	1741.87	137	151	TRUE
			pyrF "orotidine 5'-phosphate decarboxylase"	llmg_1107	26151.2	1	3	4	4	0.0392	0.224	LGMELFYTAGPQVVYYVK	K	S	0.95	33	17	0	1	0	0	2	2094.06	35	52	TRUE
			pyrF "orotidine 5'-phosphate decarboxylase"	llmg_1107	26151.2	1	3	4	4	0.0392	0.224	LIAVTQLTSTSEEIMQNDQK	K	I	0.95	37	15.4	0	0	1	0	2	2265.13	117	136	TRUE
			rrmA "putative rRNA (guanine-N1-)-methyltransferase"	llmg_2246	31746	1	3	3	3	0.0294	0.128	ADTEHYTR	K	K	0.95	33.8	9.03	0	1	0	0	2	992.444	58	65	TRUE
			rrmA "putative rRNA (guanine-N1-)-methyltransferase"	llmg_2246	31746	1	3	3	3	0.0294	0.128	EVYQLPVDYNNQPVLER	R	F	0.95	72.9	15.4	0	1	0	0	2	2076.04	193	209	TRUE
			rrmA "putative rRNA (guanine-N1-)-methyltransferase"	llmg_2246	31746	1	3	3	3	0.0294	0.128	VLAESGLVIK	R	I	0.95	33.8	14.8	0	1	0	0	2	1028.64	171	180	TRUE
838	6.382e-05	-1.5293	murB "UDP-N-acetylenolpyruvoylglucosamine reductase"	llmg_1329	32027.2	1	11	13	13	0.197	0.488	ATDTPVTVLGNASNLIVR	K	D	0.95	81.9	14.6	0	1	1	0	2	1841.01	54	71	TRUE
			murB "UDP-N-acetylenolpyruvoylglucosamine reductase"	llmg_1329	32027.2	1	11	13	13	0.197	0.488	DKNLIVLSAK	R	F	0.95	37.5	15.6	0	1	0	0	2	1100.67	178	187	TRUE
			murB "UDP-N-acetylenolpyruvoylglucosamine reductase"	llmg_1329	32027.2	1	11	13	13	0.197	0.488	ENSGVTLEPEVR	K	I	0.95	43.3	15.2	0	1	0	0	2	1329.67	283	294	TRUE
			murB "UDP-N-acetylenolpyruvoylglucosamine reductase"	llmg_1329	32027.2	1	11	13	13	0.197	0.488	FELQAGDPTQIQNEMDR	K	L	0.95	80.2	10.8	0	1	1	0	2	2007.91	188	204	TRUE
			murB "UDP-N-acetylenolpyruvoylglucosamine reductase"	llmg_1329	32027.2	1	11	13	13	0.197	0.488	FNEPLSNYTYTK	K	V	0.95	53.4	14.8	0	1	0	0	2	1476.7	17	28	TRUE
			murB "UDP-N-acetylenolpyruvoylglucosamine reductase"	llmg_1329	32027.2	1	11	13	13	0.197	0.488	GLVILLEK	R	L	0.95	27.5	16.5	0	1	0	0	2	884.582	77	84	TRUE
			murB "UDP-N-acetylenolpyruvoylglucosamine reductase"	llmg_1329	32027.2	1	11	13	13	0.197	0.488	HAGFMVNVADGNATDYEK	K	L	0.95	64.4	10	0	0	1	0	2	1954.86	255	272	TRUE
			murB "UDP-N-acetylenolpyruvoylglucosamine reductase"	llmg_1329	32027.2	1	11	13	13	0.197	0.488	RPVGHFAGQLIQEAK	K	L	0.95	53.5	13.8	0	1	0	0	2	1650.91	226	240	TRUE
			murB "UDP-N-acetylenolpyruvoylglucosamine reductase"	llmg_1329	32027.2	1	11	13	13	0.197	0.488	VAGYTIEAQAGAK	K	L	0.95	66.2	16.5	0	1	0	0	2	1278.67	90	102	TRUE
			murB "UDP-N-acetylenolpyruvoylglucosamine reductase"	llmg_1329	32027.2	1	11	13	13	0.197	0.488	VKENSGVTLEPEVR	K	I	0.95	62.6	16.4	0	1	0	0	2	1556.83	281	294	TRUE
			murB "UDP-N-acetylenolpyruvoylglucosamine reductase"	llmg_1329	32027.2	1	11	13	13	0.197	0.488	VMDAEGNVSVLSASEMQFGYR	K	H	0.95	38.9	9.03	0	0	1	0	2	2322.04	152	172	TRUE
			rplB "50S ribosomal protein L2"	llmg_2380	29572.6	1	6	6	6	0.0909	0.304	ATIGVVGNEQQSLINLGK	R	A	0.95	77.1	14.6	0	1	0	0	2	1841.01	190	207	TRUE
			rplB "50S ribosomal protein L2"	llmg_2380	29572.6	1	6	6	6	0.0909	0.304	GLEVGMTVVSGPDADIK	K	V	0.95	59.2	14.5	0	1	0	0	2	1703.85	109	125	TRUE
			rplB "50S ribosomal protein L2"	llmg_2380	29572.6	1	6	6	6	0.0909	0.304	NMTGSDFAEITTSTPEK	R	S	0.95	95.4	7.78	0	1	0	0	2	1844.82	15	31	TRUE
			rplB "50S ribosomal protein L2"	llmg_2380	29572.6	1	6	6	6	0.0909	0.304	SAGASAQVLGSEGK	R	Y	0.95	74.8	15.3	0	1	0	0	2	1261.64	157	170	TRUE
			rplB "50S ribosomal protein L2"	llmg_2380	29572.6	1	6	6	6	0.0909	0.304	TTDNVVAK	R	V	0.95	28.7	19	0	1	0	0	2	847.453	70	77	TRUE
			rplB "50S ribosomal protein L2"	llmg_2380	29572.6	1	6	6	6	0.0909	0.304	VATIEYDPNR	K	T	0.95	33.1	15.7	0	1	0	0	2	1177.59	78	87	TRUE
			fusA "elongation factor G"	llmg_2556	77955.1	1	3	3	3	0.0455	0.055	LYDGSYHDVDSSETAFK	K	V	0.95	30	6.99	0	0	1	0	2	1933.85	580	596	TRUE
			fusA "elongation factor G"	llmg_2556	77955.1	1	3	3	3	0.0455	0.055	SVQEEIIAK	K	N	0.95	43.9	18.2	0	1	0	0	2	1016.56	695	703	TRUE
			fusA "elongation factor G"	llmg_2556	77955.1	1	3	3	3	0.0455	0.055	VEANVGAPQVAYR	K	E	0.95	33.3	16.2	0	1	0	0	2	1373.72	485	497	TRUE
859	0.0178	-1.738	fbaA "fructose-bisphosphate aldolase"	llmg_2167	31972.1	1	9	10	10	0.0719	0.302	ALVEAMGHNVPIVLHGGSGIPDDQIR	K	E	0.95	54.4	13.2	0	0	1	0	2	2711.39	199	224	TRUE
			fbaA "fructose-bisphosphate aldolase"	llmg_2167	31972.1	1	9	10	10	0.0719	0.302	FLKPGFDAITASVEER	K	I	0.95	43.7	14.9	0	1	0	0	2	1779.93	273	288	TRUE
			fbaA "fructose-bisphosphate aldolase"	llmg_2167	31972.1	1	9	10	10	0.0719	0.302	FVNEFDANEAEYMK	K	K	0.95	82.8	8.45	0	1	0	0	2	1722.73	251	264	TRUE
			fbaA "fructose-bisphosphate aldolase"	llmg_2167	31972.1	1	9	10	10	0.0719	0.302	IDVFGSANK	R	A	0.95	28.9	15.4	0	1	0	0	2	950.495	289	297	TRUE
			fbaA "fructose-bisphosphate aldolase"	llmg_2167	31972.1	1	9	10	10	0.0719	0.302	IDVFGSANKA	R	-	0.95	52.2	17.2	0	1	0	0	2	1021.53	289	298	TRUE
			fbaA "fructose-bisphosphate aldolase"	llmg_2167	31972.1	1	9	10	10	0.0719	0.302	KFLKPGFDAITASVEER	R	I	0.95	39.9	13.6	0	0	1	0	2	1908.02	272	288	TRUE
			fbaA "fructose-bisphosphate aldolase"	llmg_2167	31972.1	1	9	10	10	0.0719	0.302	KFVNEFDANEAEYMK	R	K	0.95	38.5	10.4	0	1	1	0	2	1850.83	250	264	TRUE
			fbaA "fructose-bisphosphate aldolase"	llmg_2167	31972.1	1	9	10	10	0.0719	0.302	KTPVLIQTSMGAAK	K	Y	0.95	28	14.9	0	1	0	0	2	1460.81	42	55	TRUE
			fbaA "fructose-bisphosphate aldolase"	llmg_2167	31972.1	1	9	10	10	0.0719	0.302	LAEEVIAK	K	A	0.95	36.6	17.2	0	1	0	0	2	872.509	118	125	TRUE
			aldC "AldC protein"	llmg_1464	24830.9	1	8	12	15	0.108	0.611	ENISGTMLGVWAPK	K	H	0.95	66.4	16	0	2	0	0	2	1518.76	148	161	TRUE
			aldC "AldC protein"	llmg_1464	24830.9	1	8	12	15	0.108	0.611	EVTVSSKPANNTRPYDEIMADQPYFTK	K	E	0.95	35.7	10.4	0	0	1	0	2	3117.48	121	147	TRUE
			aldC "AldC protein"	llmg_1464	24830.9	1	8	12	15	0.108	0.611	FPTANTAYTIVMTGQFK	R	E	0.95	65.5	14.6	0	1	1	0	2	1905.94	104	120	TRUE
			aldC "AldC protein"	llmg_1464	24830.9	1	8	12	15	0.108	0.611	FTDNSVSNSEDFLSALTK	K	R	0.95	60.7	13.4	0	1	1	0	2	1974.93	85	102	TRUE
			aldC "AldC protein"	llmg_1464	24830.9	1	8	12	15	0.108	0.611	IFQHNTFTTLSSGFYK	R	G	0.95	70.2	15.3	0	1	0	0	2	1890.94	5	20	TRUE
			aldC "AldC protein"	llmg_1464	24830.9	1	8	12	15	0.108	0.611	ITQIEQEFPDEDENFDQHLFQ	K	-	0.95	56.6	6.99	0	1	1	0	2	2622.16	201	221	TRUE
			aldC "AldC protein"	llmg_1464	24830.9	1	8	12	15	0.108	0.611	LVEENETMPYVAMVEHQPIVK	R	F	0.95	36.1	14	0	1	3	0	2	2488.21	64	84	TRUE
			aldC "AldC protein"	llmg_1464	24830.9	1	8	12	15	0.108	0.611	RFPTANTAYTIVMTGQFK	K	E	0.95	28.5	14.6	0	1	0	0	2	2062.04	103	120	TRUE
			rplD "50S ribosomal protein L4"	llmg_2382	22345.2	1	4	4	4	0.0288	0.274	LIAVDTLDFAAPK	K	T	0.95	37.9	16.8	0	1	0	0	2	1373.77	123	135	TRUE
			rplD "50S ribosomal protein L4"	llmg_2382	22345.2	1	4	4	4	0.0288	0.274	VISALSIER	K	K	0.95	28.1	16.6	0	1	0	0	2	987.584	142	150	TRUE
			rplD "50S ribosomal protein L4"	llmg_2382	22345.2	1	4	4	4	0.0288	0.274	VLVVLPNEGNEFAELSAR	K	N	0.95	38.7	13.2	0	1	0	0	2	1957.04	152	169	TRUE
			rplD "50S ribosomal protein L4"	llmg_2382	22345.2	1	4	4	4	0.0288	0.274	VTTANSASVLDIVSADK	K	L	0.95	45.4	15.4	0	1	0	0	2	1690.89	176	192	TRUE
			llmg_1425 "transcriptional regulator, RpiR family"	llmg_1425	31912.5	1	3	3	3	0.0216	0.12	GMEIPIIAITSR	R	E	0.95	37.4	16	0	1	0	0	2	1316.72	202	213	TRUE
			llmg_1425 "transcriptional regulator, RpiR family"	llmg_1425	31912.5	1	3	3	3	0.0216	0.12	IADYIFEVGEK	K	M	0.95	58.5	17	0	1	0	0	2	1283.65	21	31	TRUE
			llmg_1425 "transcriptional regulator, RpiR family"	llmg_1425	31912.5	1	3	3	3	0.0216	0.12	KLGYDGFSQLK	R	Q	0.95	27.3	15.4	0	1	0	0	2	1255.67	57	67	TRUE
869	0.01211	-1.5941	murB "UDP-N-acetylenolpyruvoylglucosamine reductase"	llmg_1329	32027.2	1	13	16	16	0.113	0.612	ATDTPVTVLGNASNLIVR	K	D	0.95	49.9	15.3	0	0	1	0	2	1841.01	54	71	TRUE
			murB "UDP-N-acetylenolpyruvoylglucosamine reductase"	llmg_1329	32027.2	1	13	16	16	0.113	0.612	DKNLIVLSAK	R	F	0.95	45.3	14.1	0	1	0	0	2	1100.67	178	187	TRUE
			murB "UDP-N-acetylenolpyruvoylglucosamine reductase"	llmg_1329	32027.2	1	13	16	16	0.113	0.612	ENSGVTLEPEVR	K	I	0.95	52.8	15.4	0	1	0	0	2	1329.67	283	294	TRUE
			murB "UDP-N-acetylenolpyruvoylglucosamine reductase"	llmg_1329	32027.2	1	13	16	16	0.113	0.612	ETDLENIPDLLIK	K	F	0.95	45.4	15.7	0	1	0	0	2	1512.82	4	16	TRUE
			murB "UDP-N-acetylenolpyruvoylglucosamine reductase"	llmg_1329	32027.2	1	13	16	16	0.113	0.612	FELQAGDPTQIQNEMDR	K	L	0.95	69.2	10.8	0	1	0	0	2	2007.91	188	204	TRUE
			murB "UDP-N-acetylenolpyruvoylglucosamine reductase"	llmg_1329	32027.2	1	13	16	16	0.113	0.612	FNEPLSNYTYTK	K	V	0.95	67.6	14.9	0	1	0	0	2	1476.7	17	28	TRUE
			murB "UDP-N-acetylenolpyruvoylglucosamine reductase"	llmg_1329	32027.2	1	13	16	16	0.113	0.612	HAGFMVNVADGNATDYEK	K	L	0.95	62	10	0	1	1	0	2	1954.86	255	272	TRUE
			murB "UDP-N-acetylenolpyruvoylglucosamine reductase"	llmg_1329	32027.2	1	13	16	16	0.113	0.612	IGGVEVSKK	R	H	0.95	38.5	16.3	0	1	0	0	2	916.547	246	254	TRUE
			murB "UDP-N-acetylenolpyruvoylglucosamine reductase"	llmg_1329	32027.2	1	13	16	16	0.113	0.612	RPVGHFAGQLIQEAK	K	L	0.95	54.9	13.6	0	1	1	0	2	1650.91	226	240	TRUE
			murB "UDP-N-acetylenolpyruvoylglucosamine reductase"	llmg_1329	32027.2	1	13	16	16	0.113	0.612	VAGYTIEAQAGAK	K	L	0.95	77.7	16.1	0	1	0	0	2	1278.67	90	102	TRUE
			murB "UDP-N-acetylenolpyruvoylglucosamine reductase"	llmg_1329	32027.2	1	13	16	16	0.113	0.612	VGGPADILAFPATIEALTELSAK	K	A	0.95	26.2	11.5	0	0	1	0	2	2284.24	29	51	TRUE
			murB "UDP-N-acetylenolpyruvoylglucosamine reductase"	llmg_1329	32027.2	1	13	16	16	0.113	0.612	VKENSGVTLEPEVR	K	I	0.95	41	16	0	1	0	0	2	1556.83	281	294	TRUE
			murB "UDP-N-acetylenolpyruvoylglucosamine reductase"	llmg_1329	32027.2	1	13	16	16	0.113	0.612	VMDAEGNVSVLSASEMQFGYR	K	H	0.95	117	9.54	0	1	1	0	2	2322.04	152	172	TRUE
			fbaA "fructose-bisphosphate aldolase"	llmg_2167	31972.1	1	10	13	17	0.12	0.305	ALVEAMGHNVPIVLHGGSGIPDDQIR	K	E	0.95	57.2	14.5	0	0	2	0	2	2695.4	199	224	TRUE
			fbaA "fructose-bisphosphate aldolase"	llmg_2167	31972.1	1	10	13	17	0.12	0.305	FLKPGFDAITASVEER	K	I	0.95	51.7	14.8	0	1	1	0	2	1779.93	273	288	TRUE
			fbaA "fructose-bisphosphate aldolase"	llmg_2167	31972.1	1	10	13	17	0.12	0.305	FVNEFDANEAEYMK	K	K	0.95	96.1	8.45	0	1	0	0	2	1722.73	251	264	TRUE
			fbaA "fructose-bisphosphate aldolase"	llmg_2167	31972.1	1	10	13	17	0.12	0.305	FVNEFDANEAEYMKK	K	K	0.95	45.8	10.4	0	1	0	0	2	1850.83	251	265	TRUE
			fbaA "fructose-bisphosphate aldolase"	llmg_2167	31972.1	1	10	13	17	0.12	0.305	IDVFGSANKA	R	-	0.95	50.2	17.1	0	1	0	0	2	1021.53	289	298	TRUE
			fbaA "fructose-bisphosphate aldolase"	llmg_2167	31972.1	1	10	13	17	0.12	0.305	KFLKPGFDAITASVEER	R	I	0.95	42.1	13.4	0	1	1	0	2	1908.02	272	288	TRUE
			fbaA "fructose-bisphosphate aldolase"	llmg_2167	31972.1	1	10	13	17	0.12	0.305	KFVNEFDANEAEYMK	R	K	0.95	64.8	12	0	1	0	0	2	1834.83	250	264	TRUE
			fbaA "fructose-bisphosphate aldolase"	llmg_2167	31972.1	1	10	13	17	0.12	0.305	KTPVLIQTSMGAAK	K	Y	0.95	58.7	14.6	0	2	2	0	2	1444.82	42	55	TRUE
			fbaA "fructose-bisphosphate aldolase"	llmg_2167	31972.1	1	10	13	17	0.12	0.305	LAEEVIAK	K	A	0.95	27.8	17.1	0	1	0	0	2	872.509	118	125	TRUE
			fbaA "fructose-bisphosphate aldolase"	llmg_2167	31972.1	1	10	13	17	0.12	0.305	TPVLIQTSMGAAK	K	Y	0.95	60.8	17.5	0	2	0	0	2	1332.72	43	55	TRUE
			rplB "50S ribosomal protein L2"	llmg_2380	29572.6	1	7	7	9	0.0634	0.366	ATIGVVGNEQQSLINLGK	R	A	0.95	53.9	14.8	0	1	0	0	2	1841.01	190	207	TRUE
			rplB "50S ribosomal protein L2"	llmg_2380	29572.6	1	7	7	9	0.0634	0.366	GLEVGMTVVSGPDADIK	K	V	0.95	68.2	14.3	0	2	0	0	2	1703.85	109	125	TRUE
			rplB "50S ribosomal protein L2"	llmg_2380	29572.6	1	7	7	9	0.0634	0.366	GSVMNPNDHPHGGGEGR	R	Q	0.95	36.5	9.54	0	0	1	0	2	1733.74	222	238	TRUE
			rplB "50S ribosomal protein L2"	llmg_2380	29572.6	1	7	7	9	0.0634	0.366	NMTGSDFAEITTSTPEK	R	S	0.95	104	7.78	0	2	0	0	2	1844.82	15	31	TRUE
			rplB "50S ribosomal protein L2"	llmg_2380	29572.6	1	7	7	9	0.0634	0.366	SAGASAQVLGSEGK	R	Y	0.95	87.1	15.6	0	1	0	0	2	1261.64	157	170	TRUE
			rplB "50S ribosomal protein L2"	llmg_2380	29572.6	1	7	7	9	0.0634	0.366	TTDNVVAK	R	V	0.95	33.2	18.3	0	1	0	0	2	847.453	70	77	TRUE
			rplB "50S ribosomal protein L2"	llmg_2380	29572.6	1	7	7	9	0.0634	0.366	VATIEYDPNR	K	T	0.95	47.4	15.6	0	1	0	0	2	1177.59	78	87	TRUE
			miaA "tRNA delta(2)-isopentenylpyrophosphate transferase"	llmg_0591	33486.9	1	7	8	9	0.0634	0.299	AEQALAVHHLIDVR	K	K	0.95	54.6	14.9	0	1	1	0	2	1571.87	54	67	TRUE
			miaA "tRNA delta(2)-isopentenylpyrophosphate transferase"	llmg_0591	33486.9	1	7	8	9	0.0634	0.299	LIEEIIER	R	G	0.95	39.2	16.4	0	1	0	0	2	1014.58	85	92	TRUE
			miaA "tRNA delta(2)-isopentenylpyrophosphate transferase"	llmg_0591	33486.9	1	7	8	9	0.0634	0.299	LNPNFPELNR	K	R	0.95	34.5	15.4	0	1	0	0	2	1213.63	146	155	TRUE
			miaA "tRNA delta(2)-isopentenylpyrophosphate transferase"	llmg_0591	33486.9	1	7	8	9	0.0634	0.299	MEVEFEDVFSETYPDSVFEK	R	V	0.95	50.6	6.02	0	1	0	0	2	2443.05	269	288	TRUE
			miaA "tRNA delta(2)-isopentenylpyrophosphate transferase"	llmg_0591	33486.9	1	7	8	9	0.0634	0.299	TALGIDLAIK	K	M	0.95	52.5	13.8	0	1	0	0	2	1014.62	18	27	TRUE
			miaA "tRNA delta(2)-isopentenylpyrophosphate transferase"	llmg_0591	33486.9	1	7	8	9	0.0634	0.299	VEQMMSEGLLSEAR	R	S	0.95	54.1	14.1	0	2	0	0	2	1595.74	200	213	TRUE
			miaA "tRNA delta(2)-isopentenylpyrophosphate transferase"	llmg_0591	33486.9	1	7	8	9	0.0634	0.299	VLVVVGPTAVGK	K	T	0.95	47.2	6.99	0	1	0	0	2	1138.72	6	17	TRUE
			llmg_0492 "hypothetical protein"	llmg_0492	30803.6	1	2	2	2	0.0141	0.115	ENTELFIGFSTLENLVK	R	G	0.95	43.7	14.3	0	1	0	0	2	1954.02	150	166	TRUE
			llmg_0492 "hypothetical protein"	llmg_0492	30803.6	1	2	2	2	0.0141	0.115	TSQPPVGVFAEVYEK	K	I	0.95	28.8	16.9	0	1	0	0	2	1650.84	60	74	TRUE
			rpsB "30S ribosomal protein S2"	llmg_2430	28534.7	1	2	2	2	0.0141	0.0824	MADAIIEGR	K	Q	0.95	37.2	16.1	0	1	0	0	2	991.488	217	225	TRUE
			rpsB "30S ribosomal protein S2"	llmg_2430	28534.7	1	2	2	2	0.0141	0.0824	QAAEAVKEEALR	K	A	0.95	52.7	15.3	0	1	0	0	2	1314.7	75	86	TRUE
			rplC "50S ribosomal protein L3"	llmg_2383	21900.2	0.999	2	2	2	0.0141	0.159	SVETDGYEATQVGFDTLR	K	E	0.95	31.5	13	0	0	1	0	2	1987.93	40	57	TRUE
			rplC "50S ribosomal protein L3"	llmg_2383	21900.2	0.999	2	2	2	0.0141	0.159	VTVQNLVIAQVLPEK	R	N	0.95	42.4	4.77	0	1	0	0	2	1650.98	167	181	TRUE
892	0.007486	1.9779	llmg_0492 "hypothetical protein"	llmg_0492	30803.6	1	11	13	16	0.0681	0.475	DRELNTLLR	K	G	0.95	38	18.1	0	1	0	0	2	1129.63	191	199	TRUE
			llmg_0492 "hypothetical protein"	llmg_0492	30803.6	1	11	13	16	0.0681	0.475	EIGISHAQGLEFSQK	R	A	0.95	61	16.1	0	1	0	0	2	1643.84	226	240	TRUE
			llmg_0492 "hypothetical protein"	llmg_0492	30803.6	1	11	13	16	0.0681	0.475	ENTELFIGFSTLENLVK	R	G	0.95	89.4	14.5	0	1	0	0	2	1954.02	150	166	TRUE
			llmg_0492 "hypothetical protein"	llmg_0492	30803.6	1	11	13	16	0.0681	0.475	FQVVEAAR	K	L	0.95	44.6	16	0	1	0	0	2	919.5	123	130	TRUE
			llmg_0492 "hypothetical protein"	llmg_0492	30803.6	1	11	13	16	0.0681	0.475	IREIGISHAQGLEFSQK	K	A	0.95	28.8	12.3	0	0	1	0	2	1913.02	224	240	TRUE
			llmg_0492 "hypothetical protein"	llmg_0492	30803.6	1	11	13	16	0.0681	0.475	IVTDSSITIEPELAR	K	E	0.95	75.5	16	0	1	1	0	2	1643.89	5	19	TRUE
			llmg_0492 "hypothetical protein"	llmg_0492	30803.6	1	11	13	16	0.0681	0.475	MTGLFGSLLQVR	R	V	0.95	59.6	14.8	0	3	0	0	2	1337.73	173	184	TRUE
			llmg_0492 "hypothetical protein"	llmg_0492	30803.6	1	11	13	16	0.0681	0.475	NVTVIDSDFTDQAQK	R	F	0.95	73.8	16.6	0	1	0	0	2	1680.81	108	122	TRUE
			llmg_0492 "hypothetical protein"	llmg_0492	30803.6	1	11	13	16	0.0681	0.475	TGATKEEILEK	K	I	0.95	55.1	17.6	0	1	1	0	2	1218.66	134	144	TRUE
			llmg_0492 "hypothetical protein"	llmg_0492	30803.6	1	11	13	16	0.0681	0.475	TSQPPVGVFAEVYEK	K	I	0.95	69.7	17.2	0	2	0	0	2	1650.84	60	74	TRUE
			llmg_0492 "hypothetical protein"	llmg_0492	30803.6	1	11	13	16	0.0681	0.475	WLEELSDTISSSR	K	R	0.95	59	13	0	1	0	0	2	1522.74	209	221	TRUE
			llmg_1497 "putative hydrolase"	llmg_1497	30054.4	1	10	11	13	0.0553	0.421	ATGEEFIK	R	E	0.95	31.9	16.3	0	1	0	0	2	894.457	76	83	TRUE
			llmg_1497 "putative hydrolase"	llmg_1497	30054.4	1	10	11	13	0.0553	0.421	EGIYTPNHDVGR	R	Y	0.95	28.1	13.8	0	1	0	0	2	1357.65	111	122	TRUE
			llmg_1497 "putative hydrolase"	llmg_1497	30054.4	1	10	11	13	0.0553	0.421	IGLPIHAITR	K	E	0.95	45	11.1	0	1	0	0	2	1090.67	101	110	TRUE
			llmg_1497 "putative hydrolase"	llmg_1497	30054.4	1	10	11	13	0.0553	0.421	IVITTGRPLPGVVDILK	K	A	0.95	33.5	9.03	0	0	2	0	2	1791.11	38	54	TRUE
			llmg_1497 "putative hydrolase"	llmg_1497	30054.4	1	10	11	13	0.0553	0.421	KIGLPIHAITR	R	E	0.95	29.9	6.99	0	0	1	0	2	1218.77	100	110	TRUE
			llmg_1497 "putative hydrolase"	llmg_1497	30054.4	1	10	11	13	0.0553	0.421	LSFDLDEVMAIGDEENDR	K	S	0.95	121	9.54	0	1	0	0	2	2083.91	205	222	TRUE
			llmg_1497 "putative hydrolase"	llmg_1497	30054.4	1	10	11	13	0.0553	0.421	LVAIDLDGTLLDPNR	K	Q	0.95	70.4	13	0	1	1	0	2	1624.89	4	18	TRUE
			llmg_1497 "putative hydrolase"	llmg_1497	30054.4	1	10	11	13	0.0553	0.421	QPEDIAALEIAK	R	V	0.95	45.3	16.8	0	1	0	0	2	1297.7	139	150	TRUE
			llmg_1497 "putative hydrolase"	llmg_1497	30054.4	1	10	11	13	0.0553	0.421	STPYYLEFMNK	K	K	0.95	31.3	15.4	0	1	0	0	2	1408.65	180	190	TRUE
			llmg_1497 "putative hydrolase"	llmg_1497	30054.4	1	10	11	13	0.0553	0.421	YTVQEAQMVK	R	M	0.95	36.8	15.6	0	2	0	0	2	1212.59	123	132	TRUE
			rplB "50S ribosomal protein L2"	llmg_2380	29572.6	1	3	3	3	0.0128	0.152	ATIGVVGNEQQSLINLGK	R	A	0.95	36.5	14.3	0	1	0	0	2	1841.01	190	207	TRUE
			rplB "50S ribosomal protein L2"	llmg_2380	29572.6	1	3	3	3	0.0128	0.152	SAGASAQVLGSEGK	R	Y	0.95	41.1	15.3	0	1	0	0	2	1261.64	157	170	TRUE
			rplB "50S ribosomal protein L2"	llmg_2380	29572.6	1	3	3	3	0.0128	0.152	VATIEYDPNR	K	T	0.95	33.2	15.7	0	1	0	0	2	1177.59	78	87	TRUE
			holB "DNA polymerase III subunit delta'"	llmg_0416	33036.1	1	3	3	3	0.0128	0.115	MEIVDIQPQLYK	-	Q	0.95	65.3	17.7	0	1	0	0	2	1492.77	1	12	TRUE
			holB "DNA polymerase III subunit delta'"	llmg_0416	33036.1	1	3	3	3	0.0128	0.115	NVQFLQDFLEK	K	N	0.95	43.9	15.4	0	1	0	0	2	1380.72	163	173	TRUE
			holB "DNA polymerase III subunit delta'"	llmg_0416	33036.1	1	3	3	3	0.0128	0.115	SADEAFLYLK	K	D	0.95	45	16.9	0	1	0	0	2	1156.59	220	229	TRUE
			pyrR "pyrimidine regulatory protein PyrR"	llmg_0890	19794.8	1	3	3	3	0.0128	0.243	DVILVDDVLYTGR	K	T	0.95	44.5	17.2	0	1	0	0	2	1477.79	92	104	TRUE
			pyrR "pyrimidine regulatory protein PyrR"	llmg_0890	19794.8	1	3	3	3	0.0128	0.243	LQQLEGLEIPFGELDTRPFR	R	D	0.95	30.9	15.4	0	0	1	0	2	2358.25	53	72	TRUE
			pyrR "pyrimidine regulatory protein PyrR"	llmg_0890	19794.8	1	3	3	3	0.0128	0.243	VQLAVLVDR	R	G	0.95	36.2	12.8	0	1	0	0	2	1012.62	122	130	TRUE
			llmg_1746 "putative hydrolase"	llmg_1746	30158.4	1	2	2	2	0.00851	0.108	LIALDLDGTLLNSSK	K	E	0.95	77.2	13.2	0	1	0	0	2	1572.89	7	21	TRUE
			llmg_1746 "putative hydrolase"	llmg_1746	30158.4	1	2	2	2	0.00851	0.108	VDFDQVPLDVVYNK	K	I	0.95	26.4	16.9	0	1	0	0	2	1650.84	139	152	TRUE
905	5.159e-05	-1.9407	llrB "two-component system regulator llrB"	llmg_1068	27257.3	1	15	18	20	0.116	0.53	AILTLLSYNFR	R	Q	0.95	59.9	11.1	0	2	1	0	2	1310.75	12	22	TRUE
			llrB "two-component system regulator llrB"	llmg_1068	27257.3	1	15	18	20	0.116	0.53	DDDEMKLTGLSAGSDEYLDK	R	T	0.95	61.4	7.78	0	0	1	0	2	2217.97	83	102	TRUE
			llrB "two-component system regulator llrB"	llmg_1068	27257.3	1	15	18	20	0.116	0.53	EFEILELLAK	R	R	0.95	27.4	15.9	0	1	0	0	2	1204.68	169	178	TRUE
			llrB "two-component system regulator llrB"	llmg_1068	27257.3	1	15	18	20	0.116	0.53	EGNFTPILILTAR	K	D	0.95	29.8	14.5	0	2	0	0	2	1444.82	70	82	TRUE
			llrB "two-component system regulator llrB"	llmg_1068	27257.3	1	15	18	20	0.116	0.53	GFGYYFEENET	R	-	0.95	43.9	7.78	0	1	0	0	2	1355.54	226	236	TRUE
			llrB "two-component system regulator llrB"	llmg_1068	27257.3	1	15	18	20	0.116	0.53	ILIADDDR	K	A	0.95	33.2	17.3	0	1	0	0	2	930.49	4	11	TRUE
			llrB "two-component system regulator llrB"	llmg_1068	27257.3	1	15	18	20	0.116	0.53	KEGNFTPILILTAR	R	D	0.95	46.5	13	0	1	0	0	2	1572.91	69	82	TRUE
			llrB "two-component system regulator llrB"	llmg_1068	27257.3	1	15	18	20	0.116	0.53	LTGLSAGSDEYLDK	K	T	0.95	71.7	15.3	0	1	0	0	2	1468.72	89	102	TRUE
			llrB "two-component system regulator llrB"	llmg_1068	27257.3	1	15	18	20	0.116	0.53	NQMYNQTASDSVSESLDESPATLVTDR	R	L	0.95	89.8	6.99	0	1	1	0	2	2974.32	120	146	TRUE
			llrB "two-component system regulator llrB"	llmg_1068	27257.3	1	15	18	20	0.116	0.53	QGEIISR	R	E	0.95	32	19	0	1	0	0	2	802.442	180	186	TRUE
			llrB "two-component system regulator llrB"	llmg_1068	27257.3	1	15	18	20	0.116	0.53	QNDYEVTIVSDGK	R	K	0.95	55.5	14	0	1	0	0	2	1467.7	23	35	TRUE
			llrB "two-component system regulator llrB"	llmg_1068	27257.3	1	15	18	20	0.116	0.53	QNDYEVTIVSDGKK	R	A	0.95	53.6	17.2	0	1	1	0	2	1595.79	23	36	TRUE
			llrB "two-component system regulator llrB"	llmg_1068	27257.3	1	15	18	20	0.116	0.53	REFEILELLAK	K	R	0.95	30.7	14.6	0	1	0	0	2	1360.78	168	178	TRUE
			llrB "two-component system regulator llrB"	llmg_1068	27257.3	1	15	18	20	0.116	0.53	RNQMYNQTASDSVSESLDESPATLVTDR	R	L	0.95	79.8	8.45	0	0	1	0	2	3130.42	119	146	TRUE
			llrB "two-component system regulator llrB"	llmg_1068	27257.3	1	15	18	20	0.116	0.53	RQGEIISR	K	E	0.95	43.5	16.8	0	1	0	0	2	958.543	179	186	TRUE
			llmg_0492 "hypothetical protein"	llmg_0492	30803.6	1	8	9	11	0.064	0.388	EIGISHAQGLEFSQK	R	A	0.95	50.5	15.9	0	1	1	0	2	1643.84	226	240	TRUE
			llmg_0492 "hypothetical protein"	llmg_0492	30803.6	1	8	9	11	0.064	0.388	ENTELFIGFSTLENLVK	R	G	0.95	66.3	14.5	0	1	0	0	2	1954.02	150	166	TRUE
			llmg_0492 "hypothetical protein"	llmg_0492	30803.6	1	8	9	11	0.064	0.388	FQVVEAAR	K	L	0.95	41.2	16	0	1	0	0	2	919.5	123	130	TRUE
			llmg_0492 "hypothetical protein"	llmg_0492	30803.6	1	8	9	11	0.064	0.388	IVTDSSITIEPELAR	K	E	0.95	39.8	15.9	0	1	0	0	2	1643.89	5	19	TRUE
			llmg_0492 "hypothetical protein"	llmg_0492	30803.6	1	8	9	11	0.064	0.388	MTGLFGSLLQVR	R	V	0.95	50.9	15.2	0	3	0	0	2	1337.73	173	184	TRUE
			llmg_0492 "hypothetical protein"	llmg_0492	30803.6	1	8	9	11	0.064	0.388	NVTVIDSDFTDQAQK	R	F	0.95	62.5	13.6	0	1	0	0	2	1680.81	108	122	TRUE
			llmg_0492 "hypothetical protein"	llmg_0492	30803.6	1	8	9	11	0.064	0.388	TGATKEEILEK	K	I	0.95	41.1	17.6	0	0	1	0	2	1218.66	134	144	TRUE
			llmg_0492 "hypothetical protein"	llmg_0492	30803.6	1	8	9	11	0.064	0.388	TSQPPVGVFAEVYEK	K	I	0.95	47.9	17	0	1	0	0	2	1650.84	60	74	TRUE
			llmg_2062 "Hypothetical protein yteA"	llmg_2062	31682.6	1	4	4	4	0.0233	0.131	AINQMLEK	K	T	0.95	28.6	16.8	0	1	0	0	2	962.498	214	221	TRUE
			llmg_2062 "Hypothetical protein yteA"	llmg_2062	31682.6	1	4	4	4	0.0233	0.131	FMVDDLNHLAR	R	G	0.95	32.5	14.6	0	1	0	0	2	1346.65	163	173	TRUE
			llmg_2062 "Hypothetical protein yteA"	llmg_2062	31682.6	1	4	4	4	0.0233	0.131	TLEEMDTAYPR	K	L	0.95	35.3	11.5	0	1	0	0	2	1341.6	222	232	TRUE
			llmg_2062 "Hypothetical protein yteA"	llmg_2062	31682.6	1	4	4	4	0.0233	0.131	VLADIIPR	K	L	0.95	26.8	10.8	0	1	0	0	2	896.557	151	158	TRUE
			rplC "50S ribosomal protein L3"	llmg_2383	21900.2	1	4	5	5	0.0291	0.261	EVLTNKPAK	R	G	0.95	35.4	14.9	0	1	0	0	2	999.584	58	66	TRUE
			rplC "50S ribosomal protein L3"	llmg_2383	21900.2	1	4	5	5	0.0291	0.261	RPGSMGPVAANK	R	V	0.95	33.2	14.5	0	1	1	0	2	1200.62	140	151	TRUE
			rplC "50S ribosomal protein L3"	llmg_2383	21900.2	1	4	5	5	0.0291	0.261	SVETDGYEATQVGFDTLR	K	E	0.95	63.1	13	0	1	0	0	2	1987.93	40	57	TRUE
			rplC "50S ribosomal protein L3"	llmg_2383	21900.2	1	4	5	5	0.0291	0.261	VTVQNLVIAQVLPEK	R	N	0.95	53.5	6.02	0	1	0	0	2	1650.98	167	181	TRUE
			rplB "50S ribosomal protein L2"	llmg_2380	29572.6	1	3	3	3	0.0174	0.178	ATIGVVGNEQQSLINLGK	R	A	0.95	55.8	14.8	0	1	0	0	2	1841.01	190	207	TRUE
			rplB "50S ribosomal protein L2"	llmg_2380	29572.6	1	3	3	3	0.0174	0.178	GLEVGMTVVSGPDADIK	K	V	0.95	74.9	14.3	0	1	0	0	2	1703.85	109	125	TRUE
			rplB "50S ribosomal protein L2"	llmg_2380	29572.6	1	3	3	3	0.0174	0.178	SAGASAQVLGSEGK	R	Y	0.95	64.4	15.3	0	1	0	0	2	1261.64	157	170	TRUE
			llmg_1497 "putative hydrolase"	llmg_1497	30054.4	1	3	3	3	0.0174	0.129	IGLPIHAITR	K	E	0.95	33.2	9.03	0	1	0	0	2	1090.67	101	110	TRUE
			llmg_1497 "putative hydrolase"	llmg_1497	30054.4	1	3	3	3	0.0174	0.129	LVAIDLDGTLLDPNR	K	Q	0.95	59.3	11.5	0	1	0	0	2	1624.89	4	18	TRUE
			llmg_1497 "putative hydrolase"	llmg_1497	30054.4	1	3	3	3	0.0174	0.129	YTVQEAQMVK	R	M	0.95	55.2	15.3	0	1	0	0	2	1212.59	123	132	TRUE
			rpsM "30S ribosomal protein S13"	llmg_2356	13474.3	0.999	2	2	2	0.0116	0.19	DLTSDQEDAIR	K	R	0.95	29.1	10.4	0	1	0	0	2	1262.59	47	57	TRUE
			rpsM "30S ribosomal protein S13"	llmg_2356	13474.3	0.999	2	2	2	0.0116	0.19	VLAAAGVSEDIR	K	T	0.95	38.4	16.6	0	1	0	0	2	1200.66	33	44	TRUE
929	0.005837	4.6448	telA "putative tellurium resistance protein"	llmg_1352	23111.8	1	14	17	20	0.29	0.715	AIHHTGDNLTGEGDGDDEQLLVDLK	K	K	0.95	98.3	12.3	0	0	1	1	2	2662.26	92	116	TRUE
			telA "putative tellurium resistance protein"	llmg_1352	23111.8	1	14	17	20	0.29	0.715	AIHHTGDNLTGEGDGDDEQLLVDLKK	K	V	0.95	79	14	0	0	1	1	2	2790.36	92	117	TRUE
			telA "putative tellurium resistance protein"	llmg_1352	23111.8	1	14	17	20	0.29	0.715	AQSFGQIK	K	N	0.95	35.7	17.6	0	1	0	0	2	878.474	138	145	TRUE
			telA "putative tellurium resistance protein"	llmg_1352	23111.8	1	14	17	20	0.29	0.715	EDQIIKK	R	G	0.95	40.5	19.1	0	1	0	0	2	873.505	54	60	TRUE
			telA "putative tellurium resistance protein"	llmg_1352	23111.8	1	14	17	20	0.29	0.715	EEIHHIAPEHETIYYR	R	K	0.95	37.6	17.1	0	0	1	0	2	2036.98	69	84	TRUE
			telA "putative tellurium resistance protein"	llmg_1352	23111.8	1	14	17	20	0.29	0.715	EHPTMGK	K	V	0.95	28.3	14.5	0	1	0	0	2	799.377	16	22	TRUE
			telA "putative tellurium resistance protein"	llmg_1352	23111.8	1	14	17	20	0.29	0.715	FDQLAVVINIFNAQSK	R	A	0.95	102	12.6	0	1	1	0	2	1806.98	122	137	TRUE
			telA "putative tellurium resistance protein"	llmg_1352	23111.8	1	14	17	20	0.29	0.715	FNLTESYGQATGIIVGEFTR	R	V	0.95	92.4	13.4	0	1	0	0	2	2203.1	162	181	TRUE
			telA "putative tellurium resistance protein"	llmg_1352	23111.8	1	14	17	20	0.29	0.715	KGLFGLGK	K	R	0.95	42.3	12.8	0	1	0	0	2	819.51	60	67	TRUE
			telA "putative tellurium resistance protein"	llmg_1352	23111.8	1	14	17	20	0.29	0.715	NIDEFYNEY	R	-	0.95	53.3	6.02	0	1	0	0	2	1206.5	199	207	TRUE
			telA "putative tellurium resistance protein"	llmg_1352	23111.8	1	14	17	20	0.29	0.715	REEIHHIAPEHETIYYR	K	K	0.95	43.6	15.2	0	0	2	0	2	2193.08	68	84	TRUE
			telA "putative tellurium resistance protein"	llmg_1352	23111.8	1	14	17	20	0.29	0.715	SGQSIDVDASILMIK	K	S	0.95	74.2	16.9	0	3	0	0	2	1592.82	34	48	TRUE
			telA "putative tellurium resistance protein"	llmg_1352	23111.8	1	14	17	20	0.29	0.715	SGTSREDQIIK	K	K	0.95	29.3	16.7	0	1	0	0	2	1233.64	49	59	TRUE
			telA "putative tellurium resistance protein"	llmg_1352	23111.8	1	14	17	20	0.29	0.715	VTVGLGWDMAK	K	S	0.95	46.7	18.3	0	1	0	0	2	1192.6	23	33	TRUE
952	0.001223	-1.9001	llmg_1817 "putative beta-phosphoglucomutase"	llmg_1817	26555.5	1	6	7	7	0.0473	0.346	AVIFDMDGVLVDTER	K	Y	0.95	62.7	15.4	0	1	0	0	2	1695.83	17	31	TRUE
			llmg_1817 "putative beta-phosphoglucomutase"	llmg_1817	26555.5	1	6	7	7	0.0473	0.346	IALASSSSMLDINQMLDTHQLR	K	S	0.95	61.4	13.8	0	0	1	0	2	2476.22	118	139	TRUE
			llmg_1817 "putative beta-phosphoglucomutase"	llmg_1817	26555.5	1	6	7	7	0.0473	0.346	ILRDDFDEQAAGK	R	L	0.95	56.1	14.1	0	1	1	0	2	1477.73	68	80	TRUE
			llmg_1817 "putative beta-phosphoglucomutase"	llmg_1817	26555.5	1	6	7	7	0.0473	0.346	LQADYEDFK	K	I	0.95	42.2	12.3	0	1	0	0	2	1128.52	81	89	TRUE
			llmg_1817 "putative beta-phosphoglucomutase"	llmg_1817	26555.5	1	6	7	7	0.0473	0.346	SYFDVILSGNDFK	R	E	0.95	95.7	14	0	1	0	0	2	1504.73	140	152	TRUE
			llmg_1817 "putative beta-phosphoglucomutase"	llmg_1817	26555.5	1	6	7	7	0.0473	0.346	VESLTAIQK	K	L	0.95	33.5	16.9	0	1	0	0	2	988.568	214	222	TRUE
			llmg_1974 "Probable ATP-dependent transporter"	llmg_1974	28450.8	1	5	5	5	0.0338	0.328	FGALIITHYQR	K	L	0.95	51.8	17.3	0	1	0	0	2	1318.73	196	206	TRUE
			llmg_1974 "Probable ATP-dependent transporter"	llmg_1974	28450.8	1	5	5	5	0.0338	0.328	GVNLVINTNEIHAIMGPNGTGK	K	S	0.95	41.3	13.6	0	0	1	0	2	2265.17	21	42	TRUE
			llmg_1974 "Probable ATP-dependent transporter"	llmg_1974	28450.8	1	5	5	5	0.0338	0.328	LGLFLAMQYPSEIPGITNAEFLR	R	A	0.95	38.5	14.3	0	0	1	0	2	2596.35	80	102	TRUE
			llmg_1974 "Probable ATP-dependent transporter"	llmg_1974	28450.8	1	5	5	5	0.0338	0.328	LLDYITPDVVHIMMDGR	R	V	0.95	35.5	14.5	0	0	1	0	2	2019.99	207	223	TRUE
			llmg_1974 "Probable ATP-dependent transporter"	llmg_1974	28450.8	1	5	5	5	0.0338	0.328	YLNEGFSGGEK	R	K	0.95	54	10.8	0	1	0	0	2	1200.55	141	151	TRUE
			llmg_0939 "hypothetical protein"	llmg_0939	31680.2	1	3	3	3	0.0203	0.132	EVQEPSDYK	K	V	0.95	35.6	13.2	0	1	0	0	2	1094.5	220	228	TRUE
			llmg_0939 "hypothetical protein"	llmg_0939	31680.2	1	3	3	3	0.0203	0.132	LAVITDSSADFAEK	K	Y	0.95	80.4	16.1	0	1	0	0	2	1466.74	3	16	TRUE
			llmg_0939 "hypothetical protein"	llmg_0939	31680.2	1	3	3	3	0.0203	0.132	TSQPSVAELDSLLK	K	D	0.95	62.3	15.9	0	1	0	0	2	1487.8	60	73	TRUE
			rdrB "transcription regulator"	llmg_1172	28543.7	1	3	3	3	0.0203	0.166	EAEILNYEER	K	S	0.95	47.4	12.6	0	1	0	0	2	1265.6	62	71	TRUE
			rdrB "transcription regulator"	llmg_1172	28543.7	1	3	3	3	0.0203	0.166	LSQISQIVDEQGSATIDFLAQK	R	L	0.95	45.8	12.6	0	0	1	0	2	2391.24	7	28	TRUE
			rdrB "transcription regulator"	llmg_1172	28543.7	1	3	3	3	0.0203	0.166	QVIALADHTK	K	L	0.95	33.9	13.6	0	1	0	0	2	1095.62	200	209	TRUE
			llmg_2323 "proteinase"	llmg_2323	29166.6	1	3	4	4	0.027	0.17	ANASEIEQLIVR	K	N	0.95	53.1	15.7	0	1	0	0	2	1342.73	79	90	TRUE
			llmg_2323 "proteinase"	llmg_2323	29166.6	1	3	4	4	0.027	0.17	GLSDFEITAMNLNVADK	K	S	0.95	68.7	15.7	0	1	0	0	2	1853.9	148	164	TRUE
			llmg_2323 "proteinase"	llmg_2323	29166.6	1	3	4	4	0.027	0.17	SEIINHITAFQPVYR	M	V	0.95	50.8	16.5	0	1	1	0	2	1787.94	2	16	TRUE
			rplC "50S ribosomal protein L3"	llmg_2383	21900.2	1	3	3	3	0.0203	0.203	EVLTNKPAK	R	G	0.95	33.3	14.9	0	1	0	0	2	999.584	58	66	TRUE
			rplC "50S ribosomal protein L3"	llmg_2383	21900.2	1	3	3	3	0.0203	0.203	SVETDGYEATQVGFDTLR	K	E	0.95	50.9	13	0	0	1	0	2	1987.93	40	57	TRUE
			rplC "50S ribosomal protein L3"	llmg_2383	21900.2	1	3	3	3	0.0203	0.203	VTVQNLVIAQVLPEK	R	N	0.95	42.2	4.77	0	1	0	0	2	1650.98	167	181	TRUE
1031	0.02608	1.7551	rpsD "30S ribosomal protein S4"	llmg_0296	23178.9	1	14	17	19	0.178	0.611	ANFVSFDADK	R	L	0.95	45.8	12.3	0	1	0	0	2	1113.52	163	172	TRUE
			rpsD "30S ribosomal protein S4"	llmg_0296	23178.9	1	14	17	19	0.178	0.611	ANFVSFDADKLEGTLVR	R	L	0.95	91.4	16	0	1	1	0	2	1881.97	163	179	TRUE
			rpsD "30S ribosomal protein S4"	llmg_0296	23178.9	1	14	17	19	0.178	0.611	EGTVGYNFMTLLEQR	K	L	0.95	58.4	14.8	0	1	0	0	2	1773.85	80	94	TRUE
			rpsD "30S ribosomal protein S4"	llmg_0296	23178.9	1	14	17	19	0.178	0.611	LPERDEINPEINDALIVEFYNK	R	M	0.95	74.5	15.2	0	0	1	0	2	2631.33	180	201	TRUE
			rpsD "30S ribosomal protein S4"	llmg_0296	23178.9	1	14	17	19	0.178	0.611	LSEYGLQLAEK	K	Q	0.95	72.7	16.3	0	1	0	0	2	1250.66	44	54	TRUE
			rpsD "30S ribosomal protein S4"	llmg_0296	23178.9	1	14	17	19	0.178	0.611	NLYVAATK	R	V	0.95	34.2	18.1	0	1	0	0	2	879.494	70	77	TRUE
			rpsD "30S ribosomal protein S4"	llmg_0296	23178.9	1	14	17	19	0.178	0.611	NYVPGQHGPNNR	R	S	0.95	37.5	14.9	0	1	1	0	2	1352.65	30	41	TRUE
			rpsD "30S ribosomal protein S4"	llmg_0296	23178.9	1	14	17	19	0.178	0.611	RNYVPGQHGPNNR	R	S	0.95	28	17.2	0	1	0	0	2	1508.75	29	41	TRUE
			rpsD "30S ribosomal protein S4"	llmg_0296	23178.9	1	14	17	19	0.178	0.611	RYGISLTGSGK	R	E	0.95	39.6	14.8	0	1	0	0	2	1138.62	14	24	TRUE
			rpsD "30S ribosomal protein S4"	llmg_0296	23178.9	1	14	17	19	0.178	0.611	SMKVPAILEAVEATK	K	G	0.95	34.2	15.2	0	1	0	0	2	1602.88	146	160	TRUE
			rpsD "30S ribosomal protein S4"	llmg_0296	23178.9	1	14	17	19	0.178	0.611	VKEGTVGYNFMTLLEQR	K	L	0.95	34.8	14.6	0	1	1	0	2	2001.01	78	94	TRUE
			rpsD "30S ribosomal protein S4"	llmg_0296	23178.9	1	14	17	19	0.178	0.611	VPAILEAVEATK	K	G	0.95	68.6	10.4	0	3	0	0	2	1240.72	149	160	TRUE
			rpsD "30S ribosomal protein S4"	llmg_0296	23178.9	1	14	17	19	0.178	0.611	VQPGQVISVR	R	E	0.95	53.8	11.5	0	1	0	0	2	1082.63	134	143	TRUE
			rpsD "30S ribosomal protein S4"	llmg_0296	23178.9	1	14	17	19	0.178	0.611	YGISLTGSGK	R	E	0.95	51	14.8	0	1	0	0	2	982.521	15	24	TRUE
1091	0.0203	1.8926	rpsD "30S ribosomal protein S4"	llmg_0296	23178.9	1	8	8	8	0.0842	0.473	ANFVSFDADKLEGTLVR	R	L	0.95	31.8	16	0	0	1	0	2	1881.97	163	179	TRUE
			rpsD "30S ribosomal protein S4"	llmg_0296	23178.9	1	8	8	8	0.0842	0.473	EGTVGYNFMTLLEQR	K	L	0.95	49.2	15.1	0	1	0	0	2	1773.85	80	94	TRUE
			rpsD "30S ribosomal protein S4"	llmg_0296	23178.9	1	8	8	8	0.0842	0.473	LPERDEINPEINDALIVEFYNK	R	M	0.95	64.8	15.9	0	0	1	0	2	2631.33	180	201	TRUE
			rpsD "30S ribosomal protein S4"	llmg_0296	23178.9	1	8	8	8	0.0842	0.473	LSEYGLQLAEK	K	Q	0.95	79.8	17.6	0	1	0	0	2	1250.66	44	54	TRUE
			rpsD "30S ribosomal protein S4"	llmg_0296	23178.9	1	8	8	8	0.0842	0.473	RVDIPSFR	K	V	0.95	30.6	16.9	0	1	0	0	2	989.553	126	133	TRUE
			rpsD "30S ribosomal protein S4"	llmg_0296	23178.9	1	8	8	8	0.0842	0.473	RYGISLTGSGK	R	E	0.95	27.6	14.8	0	1	0	0	2	1138.62	14	24	TRUE
			rpsD "30S ribosomal protein S4"	llmg_0296	23178.9	1	8	8	8	0.0842	0.473	VPAILEAVEATK	K	G	0.95	41.6	11.1	0	1	0	0	2	1240.72	149	160	TRUE
			rpsD "30S ribosomal protein S4"	llmg_0296	23178.9	1	8	8	8	0.0842	0.473	YGISLTGSGK	R	E	0.95	27.2	14.9	0	1	0	0	2	982.521	15	24	TRUE
			llrD "two-component system regulator llrD"	llmg_1648	23246	1	8	8	8	0.0842	0.344	HELYDDLSK	K	R	0.95	34.9	14.8	0	1	0	0	2	1119.53	143	151	TRUE
			llrD "two-component system regulator llrD"	llmg_1648	23246	1	8	8	8	0.0842	0.344	ILILTSFIDDEK	K	V	0.95	55	15.3	0	1	0	0	2	1406.78	80	91	TRUE
			llrD "two-component system regulator llrD"	llmg_1648	23246	1	8	8	8	0.0842	0.344	KHELYDDLSK	R	R	0.95	38.1	14.9	0	1	0	0	2	1247.63	142	151	TRUE
			llrD "two-component system regulator llrD"	llmg_1648	23246	1	8	8	8	0.0842	0.344	KVANGEDVLSDAVK	R	E	0.95	60.4	15.6	0	1	0	0	2	1444.76	119	132	TRUE
			llrD "two-component system regulator llrD"	llmg_1648	23246	1	8	8	8	0.0842	0.344	LLIVDDHQMVR	K	L	0.95	41.2	16.5	0	1	0	0	2	1354.72	6	16	TRUE
			llrD "two-component system regulator llrD"	llmg_1648	23246	1	8	8	8	0.0842	0.344	TQATIYAIQHHLV	R	-	0.95	47.3	14.8	0	1	0	0	2	1494.81	197	209	TRUE
			llrD "two-component system regulator llrD"	llmg_1648	23246	1	8	8	8	0.0842	0.344	TSQAAEIAMAIR	K	K	0.95	52.8	17.2	0	1	0	0	2	1277.65	107	118	TRUE
			llrD "two-component system regulator llrD"	llmg_1648	23246	1	8	8	8	0.0842	0.344	VANGEDVLSDAVK	K	E	0.95	102	16	0	1	0	0	2	1316.67	120	132	TRUE
			llmg_2058 "Ycf50-like protein"	llmg_2058	21919.8	1	5	5	5	0.0526	0.337	AYADIMESAR	R	I	0.95	43.5	9.54	0	1	0	0	2	1142.52	112	121	TRUE
			llmg_2058 "Ycf50-like protein"	llmg_2058	21919.8	1	5	5	5	0.0526	0.337	EMSILAGQNFESYDIY	K	-	0.95	38.5	7.78	0	1	0	0	2	1895.84	181	196	TRUE
			llmg_2058 "Ycf50-like protein"	llmg_2058	21919.8	1	5	5	5	0.0526	0.337	FMGDAQAR	K	R	0.95	31.5	10.8	0	1	0	0	2	911.405	135	142	TRUE
			llmg_2058 "Ycf50-like protein"	llmg_2058	21919.8	1	5	5	5	0.0526	0.337	IVQQQTVSQAQSLAATVSTIAIK	K	E	0.95	35.9	10	0	0	1	0	2	2385.34	86	108	TRUE
			llmg_2058 "Ycf50-like protein"	llmg_2058	21919.8	1	5	5	5	0.0526	0.337	KVQADYQSR	R	R	0.95	28.4	16.5	0	1	0	0	2	1094.56	47	55	TRUE
1121	0.01037	-1.5503	rpsD "30S ribosomal protein S4"	llmg_0296	23178.9	1	17	20	27	0.241	0.724	ANFVSFDADK	R	L	0.95	56.3	12.3	0	1	0	0	2	1113.52	163	172	TRUE
			rpsD "30S ribosomal protein S4"	llmg_0296	23178.9	1	17	20	27	0.241	0.724	ANFVSFDADKLEGTLVR	R	L	0.95	64	16.5	0	1	2	0	2	1881.97	163	179	TRUE
			rpsD "30S ribosomal protein S4"	llmg_0296	23178.9	1	17	20	27	0.241	0.724	DEINPEINDALIVEFYNK	R	M	0.95	89.7	15.8	0	1	0	0	2	2136.05	184	201	TRUE
			rpsD "30S ribosomal protein S4"	llmg_0296	23178.9	1	17	20	27	0.241	0.724	EGTVGYNFMTLLEQR	K	L	0.95	80.2	14.9	0	2	0	0	2	1773.85	80	94	TRUE
			rpsD "30S ribosomal protein S4"	llmg_0296	23178.9	1	17	20	27	0.241	0.724	FTYGLSER	R	Q	0.95	33.7	12.6	0	1	0	0	2	972.479	59	66	TRUE
			rpsD "30S ribosomal protein S4"	llmg_0296	23178.9	1	17	20	27	0.241	0.724	LDNVVYR	R	L	0.95	29.5	17.6	0	1	0	0	2	878.474	95	101	TRUE
			rpsD "30S ribosomal protein S4"	llmg_0296	23178.9	1	17	20	27	0.241	0.724	LPERDEINPEINDALIVEFYNK	R	M	0.95	56.1	15.2	0	1	2	0	2	2631.33	180	201	TRUE
			rpsD "30S ribosomal protein S4"	llmg_0296	23178.9	1	17	20	27	0.241	0.724	LSEYGLQLAEK	K	Q	0.95	68.6	16.3	0	2	0	0	2	1250.66	44	54	TRUE
			rpsD "30S ribosomal protein S4"	llmg_0296	23178.9	1	17	20	27	0.241	0.724	NLYVAATK	R	V	0.95	42.4	17.8	0	1	0	0	2	879.494	70	77	TRUE
			rpsD "30S ribosomal protein S4"	llmg_0296	23178.9	1	17	20	27	0.241	0.724	NYVPGQHGPNNR	R	S	0.95	40.4	13.4	0	1	0	0	2	1352.65	30	41	TRUE
			rpsD "30S ribosomal protein S4"	llmg_0296	23178.9	1	17	20	27	0.241	0.724	QFVNHGHILVDGK	R	R	0.95	33.6	17.8	0	1	0	0	2	1463.78	113	125	TRUE
			rpsD "30S ribosomal protein S4"	llmg_0296	23178.9	1	17	20	27	0.241	0.724	RNYVPGQHGPNNR	R	S	0.95	28	17.2	0	0	1	0	2	1508.75	29	41	TRUE
			rpsD "30S ribosomal protein S4"	llmg_0296	23178.9	1	17	20	27	0.241	0.724	RVDIPSFR	K	V	0.95	25.7	16.8	0	1	0	0	2	989.553	126	133	TRUE
			rpsD "30S ribosomal protein S4"	llmg_0296	23178.9	1	17	20	27	0.241	0.724	RYGISLTGSGK	R	E	0.95	34.3	14.8	0	1	0	0	2	1138.62	14	24	TRUE
			rpsD "30S ribosomal protein S4"	llmg_0296	23178.9	1	17	20	27	0.241	0.724	VKEGTVGYNFMTLLEQR	K	L	0.95	50.1	14.8	0	1	1	0	2	2001.01	78	94	TRUE
			rpsD "30S ribosomal protein S4"	llmg_0296	23178.9	1	17	20	27	0.241	0.724	VPAILEAVEATK	K	G	0.95	67.3	10.4	0	4	0	0	2	1240.72	149	160	TRUE
			rpsD "30S ribosomal protein S4"	llmg_0296	23178.9	1	17	20	27	0.241	0.724	YGISLTGSGK	R	E	0.95	37.6	14.9	0	1	0	0	2	982.521	15	24	TRUE
			upp "uracil phosphoribosyltransferase"	llmg_2176	23214.1	1	6	7	7	0.0625	0.46	AGIGMVDGILK	R	L	0.95	26.3	17.1	0	1	0	0	2	1089.6	80	90	TRUE
			upp "uracil phosphoribosyltransferase"	llmg_2176	23214.1	1	6	7	7	0.0625	0.46	ALQEAHPDIEIYTAALDEK	K	L	0.95	30	15.4	0	0	1	0	2	2127.06	171	189	TRUE
			upp "uracil phosphoribosyltransferase"	llmg_2176	23214.1	1	6	7	7	0.0625	0.46	DEETLKPVEYLVK	R	L	0.95	40.9	16.1	0	1	0	0	2	1562.83	105	117	TRUE
			upp "uracil phosphoribosyltransferase"	llmg_2176	23214.1	1	6	7	7	0.0625	0.46	DLPLEDVEIETPVQK	R	T	0.95	29.8	16.2	0	1	0	0	2	1724.9	47	61	TRUE
			upp "uracil phosphoribosyltransferase"	llmg_2176	23214.1	1	6	7	7	0.0625	0.46	ELVDEIGMLMAYEVSR	R	D	0.95	54.2	14	0	1	0	0	2	1886.89	31	46	TRUE
			upp "uracil phosphoribosyltransferase"	llmg_2176	23214.1	1	6	7	7	0.0625	0.46	QIFLVDPMLATGGSAILAVDSLK	R	K	0.95	81.7	10.4	0	1	1	0	2	2375.29	126	148	TRUE
1137	0.0204	-1.5169	trpS "tryptophanyl-tRNA synthetase II"	llmg_0079	38102.6	1	5	5	5	0.05	0.179	AEAVASQTLDEVK	K	N	0.95	71	17	0	1	0	0	2	1360.7	320	332	TRUE
			trpS "tryptophanyl-tRNA synthetase II"	llmg_0079	38102.6	1	5	5	5	0.05	0.179	AEDAEQIAEMK	K	A	0.95	47.9	10.8	0	1	0	0	2	1250.56	257	267	TRUE
			trpS "tryptophanyl-tRNA synthetase II"	llmg_0079	38102.6	1	5	5	5	0.05	0.179	AQYQAGGLGDVK	K	T	0.95	44.4	17.2	0	1	0	0	2	1206.61	268	279	TRUE
			trpS "tryptophanyl-tRNA synthetase II"	llmg_0079	38102.6	1	5	5	5	0.05	0.179	NAMGINYFR	K	-	0.95	33.1	10.8	0	1	0	0	2	1101.52	333	341	TRUE
			trpS "tryptophanyl-tRNA synthetase II"	llmg_0079	38102.6	1	5	5	5	0.05	0.179	RIEFAQNMDYVYDMLK	R	A	0.95	35.9	13.6	0	0	1	0	2	2067.95	299	314	TRUE
			rpsD "30S ribosomal protein S4"	llmg_0296	23178.9	1	4	4	4	0.04	0.261	ANFVSFDADKLEGTLVR	R	L	0.95	32.3	16.1	0	0	1	0	2	1881.97	163	179	TRUE
			rpsD "30S ribosomal protein S4"	llmg_0296	23178.9	1	4	4	4	0.04	0.261	EGTVGYNFMTLLEQR	K	L	0.95	26.5	15.6	0	1	0	0	2	1773.85	80	94	TRUE
			rpsD "30S ribosomal protein S4"	llmg_0296	23178.9	1	4	4	4	0.04	0.261	LSEYGLQLAEK	K	Q	0.95	47.3	16.4	0	1	0	0	2	1250.66	44	54	TRUE
			rpsD "30S ribosomal protein S4"	llmg_0296	23178.9	1	4	4	4	0.04	0.261	YGISLTGSGK	R	E	0.95	31.8	14.9	0	1	0	0	2	982.521	15	24	TRUE
			ezrA "septation ring formation regulator EzrA"	llmg_2428	66289.4	1	3	3	3	0.03	0.0573	ALQLFENSR	R	D	0.95	25.2	18	0	1	0	0	2	1077.57	530	538	TRUE
			ezrA "septation ring formation regulator EzrA"	llmg_2428	66289.4	1	3	3	3	0.03	0.0573	ASNEQVAQGISR	K	A	0.95	26.5	15.6	0	1	0	0	2	1259.63	518	529	TRUE
			ezrA "septation ring formation regulator EzrA"	llmg_2428	66289.4	1	3	3	3	0.03	0.0573	TLEIVEPGAASR	K	I	0.95	47.4	14.3	0	1	0	0	2	1242.67	550	561	TRUE
			rplD "50S ribosomal protein L4"	llmg_2382	22345.2	1	3	3	3	0.03	0.231	LIAVDTLDFAAPK	K	T	0.95	80.9	16.6	0	1	0	0	2	1373.77	123	135	TRUE
			rplD "50S ribosomal protein L4"	llmg_2382	22345.2	1	3	3	3	0.03	0.231	VLVVLPNEGNEFAELSAR	K	N	0.95	64.2	13.4	0	1	0	0	2	1957.04	152	169	TRUE
			rplD "50S ribosomal protein L4"	llmg_2382	22345.2	1	3	3	3	0.03	0.231	VTTANSASVLDIVSADK	K	L	0.95	58.2	15.7	0	1	0	0	2	1690.89	176	192	TRUE
			xpt "xanthine phosphoribosyltransferase"	llmg_1346	21708	1	2	2	2	0.02	0.122	FLTHQVDYQLMK	R	E	0.95	48.7	15.8	0	1	0	0	2	1538.77	25	36	TRUE
			xpt "xanthine phosphoribosyltransferase"	llmg_1346	21708	1	2	2	2	0.02	0.122	VIFAPADDIAFD	K	-	0.95	28.3	16.5	0	1	0	0	2	1293.64	186	197	TRUE
			sodA "SodA protein"	llmg_0429	23236.3	0.999	2	2	2	0.02	0.107	HHQTYVNNLNAAIEK	K	H	0.95	45	15.4	0	0	1	0	2	1751.88	31	45	TRUE
			sodA "SodA protein"	llmg_0429	23236.3	0.999	2	2	2	0.02	0.107	VNELYAK	K	A	0.95	44	17.9	0	1	0	0	2	836.452	198	204	TRUE
1149	6.542e-05	-1.6472	cutC "copper homeostasis protein cutC"	llmg_2269	22548.6	1	7	9	9	0.0634	0.394	AVEAGAQNIVFGALTTDNK	K	I	0.95	64.1	15.9	0	1	1	0	2	1918.99	85	103	TRUE
			cutC "copper homeostasis protein cutC"	llmg_2269	22548.6	1	7	9	9	0.0634	0.394	EAIDQLVEFGIDK	K	I	0.95	61.1	18.5	0	1	0	0	2	1476.76	135	147	TRUE
			cutC "copper homeostasis protein cutC"	llmg_2269	22548.6	1	7	9	9	0.0634	0.394	GGNFVYNSHELK	R	I	0.95	52.1	14.9	0	1	0	0	2	1364.66	65	76	TRUE
			cutC "copper homeostasis protein cutC"	llmg_2269	22548.6	1	7	9	9	0.0634	0.394	ILMHGGPLDQSLDTDK	K	I	0.95	33.9	15.4	0	1	1	0	2	1755.86	148	163	TRUE
			cutC "copper homeostasis protein cutC"	llmg_2269	22548.6	1	7	9	9	0.0634	0.394	ILMHGGPLDQSLDTDKIK	K	S	0.95	34.1	15.4	0	0	1	0	2	1997.04	148	165	TRUE
			cutC "copper homeostasis protein cutC"	llmg_2269	22548.6	1	7	9	9	0.0634	0.394	SLIDYAQGK	K	I	0.95	26	17	0	1	0	0	2	994.521	166	174	TRUE
			cutC "copper homeostasis protein cutC"	llmg_2269	22548.6	1	7	9	9	0.0634	0.394	VPQALQAGIER	K	I	0.95	75.2	12.8	0	1	0	0	2	1181.66	14	24	TRUE
			grpE "GrpE protein"	llmg_1575	20548.5	1	3	3	3	0.0211	0.156	GYQLHER	K	L	0.95	30.1	10.8	0	1	0	0	2	902.448	162	168	TRUE
			grpE "GrpE protein"	llmg_1575	20548.5	1	3	3	3	0.0211	0.156	LLRPAMVVVAQ	R	-	0.95	42.5	14	0	1	0	0	2	1212.71	169	179	TRUE
			grpE "GrpE protein"	llmg_1575	20548.5	1	3	3	3	0.0211	0.156	VSAEMQNVQR	R	R	0.95	69	13.8	0	1	0	0	2	1177.56	55	64	TRUE
			accB "acetyl-CoA carboxylase biotin carboxyl carrier protein subunit"	llmg_1782	16388.5	1	2	2	2	0.0141	0.142	DLMNQFNGSTLR	K	E	0.95	53.5	15.4	0	1	0	0	2	1411.66	8	19	TRUE
			accB "acetyl-CoA carboxylase biotin carboxyl carrier protein subunit"	llmg_1782	16388.5	1	2	2	2	0.0141	0.142	NADGELSFSK	K	N	0.95	50	14.1	0	1	0	0	2	1067.5	25	34	TRUE
			ddl "D-alanyl-alanine synthetase A"	llmg_0360	38660.6	1	2	2	2	0.0141	0.0516	IQMDIPAK	K	V	0.95	37.9	17.2	0	1	0	0	2	931.492	253	260	TRUE
			ddl "D-alanyl-alanine synthetase A"	llmg_0360	38660.6	1	2	2	2	0.0141	0.0516	VVIEQGVDAR	R	E	0.95	29.8	14.1	0	1	0	0	2	1085.6	205	214	TRUE
1216	0.004804	-1.8336	llmg_2336 "putative acetyltransferase"	llmg_2336	20824.3	1	4	4	4	0.0331	0.279	INLIPDTFIAAR	R	N	0.95	30.5	19	0	1	0	0	2	1343.77	59	70	TRUE
			llmg_2336 "putative acetyltransferase"	llmg_2336	20824.3	1	4	4	4	0.0331	0.279	NSEGTVVGYISGPVTEGR	R	Y	0.95	46.6	18.8	0	1	0	0	2	1821.9	71	88	TRUE
			llmg_2336 "putative acetyltransferase"	llmg_2336	20824.3	1	4	4	4	0.0331	0.279	TDANPEQGGFQK	R	I	0.95	33.3	16.5	0	1	0	0	2	1291.59	98	109	TRUE
			llmg_2336 "putative acetyltransferase"	llmg_2336	20824.3	1	4	4	4	0.0331	0.279	YLDDESFER	R	T	0.95	39	12	0	1	0	0	2	1173.51	89	97	TRUE
1248	0.001163	-2.1958	llmg_0585 "putative secreted protein"	llmg_0585	20559.9	1	7	8	8	0.0559	0.441	DTALDFSAEK	R	F	0.95	38.1	13	0	1	0	0	2	1096.52	53	62	TRUE
			llmg_0585 "putative secreted protein"	llmg_0585	20559.9	1	7	8	8	0.0559	0.441	EKFDSGEISADK	K	A	0.95	42.2	14.1	0	1	0	0	2	1325.62	68	79	TRUE
			llmg_0585 "putative secreted protein"	llmg_0585	20559.9	1	7	8	8	0.0559	0.441	ESGEELFDEDESDLSDEAAEVVAK	K	F	0.95	109	6.99	0	1	1	0	2	2613.12	125	148	TRUE
			llmg_0585 "putative secreted protein"	llmg_0585	20559.9	1	7	8	8	0.0559	0.441	ETVIDFFNDTK	K	D	0.95	57.2	16.1	0	1	0	0	2	1328.64	103	113	TRUE
			llmg_0585 "putative secreted protein"	llmg_0585	20559.9	1	7	8	8	0.0559	0.441	FDSGEISADK	K	A	0.95	51.4	14.1	0	1	0	0	2	1068.49	70	79	TRUE
			llmg_0585 "putative secreted protein"	llmg_0585	20559.9	1	7	8	8	0.0559	0.441	IYDDLKENPQETLTGMR	K	D	0.95	37.5	13.6	0	0	1	0	2	2022.98	36	52	TRUE
			llmg_0585 "putative secreted protein"	llmg_0585	20559.9	1	7	8	8	0.0559	0.441	VDSGELSK	K	E	0.95	30.1	16	0	1	0	0	2	834.421	95	102	TRUE
1263	0.02715	-2.1525	llmg_0237 "putative hydrolase"	llmg_0237	22309.5	1	6	8	9	0.05	0.362	AVAAQDLNQAVAFETMR	R	L	0.95	67.5	16.7	0	1	1	0	2	1850.91	152	168	TRUE
			llmg_0237 "putative hydrolase"	llmg_0237	22309.5	1	6	8	9	0.05	0.362	EVDDEIFLALIDK	K	Y	0.95	51.1	16.6	0	1	0	0	2	1519.79	64	76	TRUE
			llmg_0237 "putative hydrolase"	llmg_0237	22309.5	1	6	8	9	0.05	0.362	HMLGVEK	K	A	0.95	30.7	12.3	0	2	0	0	2	813.429	30	36	TRUE
			llmg_0237 "putative hydrolase"	llmg_0237	22309.5	1	6	8	9	0.05	0.362	IREDFGLEDEEILR	K	A	0.95	41.7	14.6	0	1	1	0	2	1733.87	100	113	TRUE
			llmg_0237 "putative hydrolase"	llmg_0237	22309.5	1	6	8	9	0.05	0.362	LVEYLAER	R	R	0.95	44.3	17.1	0	1	0	0	2	992.542	169	176	TRUE
			llmg_0237 "putative hydrolase"	llmg_0237	22309.5	1	6	8	9	0.05	0.362	VLYVADYIEEGR	K	K	0.95	72.1	13.8	0	1	0	0	2	1426.72	131	142	TRUE
			llmg_2172 "putative nitroreductase"	llmg_2172	22482.1	1	6	6	6	0.0333	0.361	AAFGTILFFEDQAVVK	K	N	0.95	52	15.3	0	1	0	0	2	1755.93	94	109	TRUE
			llmg_2172 "putative nitroreductase"	llmg_2172	22482.1	1	6	6	6	0.0333	0.361	FSPTAFNSQTGR	R	L	0.95	48.5	14.8	0	1	0	0	2	1312.63	36	47	TRUE
			llmg_2172 "putative nitroreductase"	llmg_2172	22482.1	1	6	6	6	0.0333	0.361	GQLVFGSIEAPAGEK	R	T	0.95	66.5	16	0	1	0	0	2	1502.79	175	189	TRUE
			llmg_2172 "putative nitroreductase"	llmg_2172	22482.1	1	6	6	6	0.0333	0.361	LLILTGDAQDK	R	L	0.95	60.4	15.2	0	1	0	0	2	1186.67	48	58	TRUE
			llmg_2172 "putative nitroreductase"	llmg_2172	22482.1	1	6	6	6	0.0333	0.361	LWDEIVAPELK	K	A	0.95	33.5	12.6	0	1	0	0	2	1312.72	59	69	TRUE
			llmg_2172 "putative nitroreductase"	llmg_2172	22482.1	1	6	6	6	0.0333	0.361	TFMDDSDR	K	F	0.95	44.6	4.77	0	1	0	0	2	1002.38	190	197	TRUE
			atpD "F0F1 ATP synthase subunit beta"	llmg_1946	52730.5	1	4	4	4	0.0222	0.0947	AVSVPVGESTLGR	K	V	0.95	33.7	14.5	0	1	0	0	2	1271.7	97	109	TRUE
			atpD "F0F1 ATP synthase subunit beta"	llmg_1946	52730.5	1	4	4	4	0.0222	0.0947	TIAMESTDGLTR	R	G	0.95	55.2	14.9	0	1	0	0	2	1310.63	76	87	TRUE
			atpD "F0F1 ATP synthase subunit beta"	llmg_1946	52730.5	1	4	4	4	0.0222	0.0947	VGLFGGAGVGK	K	T	0.95	34.9	15.4	0	1	0	0	2	961.547	169	179	TRUE
			atpD "F0F1 ATP synthase subunit beta"	llmg_1946	52730.5	1	4	4	4	0.0222	0.0947	VVDLLAPYLK	K	G	0.95	30.7	12	0	1	0	0	2	1130.68	156	165	TRUE
			ahpC "alkyl hydroperoxide reductase subunit C"	llmg_0356	20740	1	4	4	5	0.0278	0.214	AFDVLDEEAGLAQR	R	G	0.95	53.1	16.7	0	0	1	0	2	1533.76	107	120	TRUE
			ahpC "alkyl hydroperoxide reductase subunit C"	llmg_0356	20740	1	4	4	5	0.0278	0.214	IEEFSTDAYLGGK	K	F	0.95	51.5	14.3	0	1	0	0	2	1429.69	8	20	TRUE
			ahpC "alkyl hydroperoxide reductase subunit C"	llmg_0356	20740	1	4	4	5	0.0278	0.214	ITYPMLADPSQK	K	I	0.95	50.7	16.2	0	2	0	0	2	1363.69	92	103	TRUE
			ahpC "alkyl hydroperoxide reductase subunit C"	llmg_0356	20740	1	4	4	5	0.0278	0.214	KIEEFSTDAYLGGK	K	F	0.95	42.8	17	0	1	0	0	2	1557.78	7	20	TRUE
			pyrE "orotate phosphoribosyltransferase"	llmg_1509	22574.3	1	3	3	3	0.0167	0.139	AIAADLLEIK	K	A	0.95	40.4	13.4	0	1	0	0	2	1056.63	6	15	TRUE
			pyrE "orotate phosphoribosyltransferase"	llmg_1509	22574.3	1	3	3	3	0.0167	0.139	LPFAYIR	K	S	0.95	26.9	14.8	0	1	0	0	2	879.509	90	96	TRUE
			pyrE "orotate phosphoribosyltransferase"	llmg_1509	22574.3	1	3	3	3	0.0167	0.139	SQIEGAFAELIK	R	T	0.95	67.2	18.1	0	1	0	0	2	1305.71	50	61	TRUE

## Sheet: 3. T_OpuAC vs 8048
Row#	Lab_0	Rat_1	Rat_2	Rat_3	Rat_4	Rat_5	Rat_6	#obs	Fold Change	p Value
1	ampMG150030	1.14944	NA	0.0446692	-0.111329	-1.26852	-0.756211	5	-1.20731	0.66871
2	ampMG150031	-1.14785	0.196737	-0.452043	0.446796	-0.47869	0.121839	6	-1.24467	0.402201
3	ampMG150032	1.27981	1.66097	-0.93732	0.476493	-0.084024	0.358888	6	1.58271	0.282996
4	ampMG150051	NA	-1.05865	-0.224894	-0.933326	-0.192937	-0.593872	5	-1.82346	0.0275197
5	ampMG150055	0.149487	-0.15935	0.119814	0.400956	0.305333	0.451064	6	1.23518	0.0693241
6	ampMG150058	NA	0.354654	-0.0619616	-0.119955	NA	0.583876	4	1.20823	0.344014
7	ampMG150072	-0.97858	NA	0.228307	-2.62652	NA	NA	3	-3.08206	0.306733
8	ampMG150092	NA	-0.0224748	NA	-1.10116	0.0648933	NA	3	-1.42321	0.445967
9	ampMG150096	-1.43484	1.52385	NA	0.168527	NA	NA	3	1.08964	0.929191
10	ampMG150099	-2.47325	NA	2.26743	-0.173819	0.669734	0.701632	5	1.21938	0.810783
11	ampMG150102	-1.68336	0.515114	0.334426	-0.180465	0.530403	0.443555	6	-1.00674	0.985514
12	ampMG150119	NA	NA	NA	NA	NA	0.016227	1	1.01636	NA
13	ampMG150239	-0.00152713	-1.07746	0.556596	0.0609792	0.238474	0.188207	6	-1.0058	0.980772
14	ampMG150259	-0.299326	-0.33272	-0.140777	-0.363451	-0.229952	-0.546889	6	-1.37555	0.00233614
15	ampMG150284	0.0831634	0.324672	0.305354	-0.356234	0.0594947	-1.71926	6	-1.24251	0.523444
16	ampMG150321	0.285526	-0.259455	-0.128609	-0.0372843	0.00598524	-0.133693	6	-1.0456	0.582346
17	ampMG150323	-0.367435	-2.42059	-0.0639412	-0.253469	0.129392	-0.126843	6	-1.67724	0.238933
18	ampMG150380	-0.172827	-0.232871	0.279105	-0.0409577	0.352947	0.438026	6	1.10949	0.417633
19	ampMG150380B	0.00509359	-0.0938864	0.103391	0.234189	0.550705	0.51003	6	1.2439	0.100011
20	ampMG2722	0.0585392	2.01441	-1.64121	1.26459	NA	-0.796062	5	1.19728	0.799767
21	llmg_0001-dnaA-MG1065	-0.397568	-0.250748	0.014305	0.211691	0.112874	0.10107	6	-1.03534	0.734668
22	llmg_0002-dnaN-MG1066	-0.555592	-0.519298	0.0196465	-0.0731297	0.578021	0.355873	6	-1.03294	0.868535
23	llmg_0003-rexB-MG1068	NA	NA	NA	NA	0.195655	-0.242097	2	-1.02349	NA
24	llmg_0004-rexA-MG1069	0.27657	0.920345	0.315595	0.249101	0.661663	0.748134	6	1.6965	0.00616029
25	llmg_0005-llmg_0005-MG150026	0.22143	0.364947	0.749872	0.706575	0.450399	0.342178	6	1.60411	0.00277808
26	llmg_0006-llmg_0006-MG1071	NA	-1.03314	-0.772109	-0.123763	-0.28072	0.224663	5	-1.48738	0.153578
27	llmg_0007-llmg_0007-MG1072	0.093179	-0.325808	0.606215	0.302505	0.257407	-0.107142	6	1.14766	0.350797
28	llmg_0008-llmg_0008-MG150235	0.402479	1.26263	0.183454	0.183739	0.0657392	0.0510184	6	1.43072	0.11516
29	llmg_0009-llmg_0009-mg13950s	NA	-3.16857	NA	NA	NA	NA	1	-23.7734	NA
30	llmg_0010	-0.790002	-0.961056	NA	-1.90359	NA	0.262888	4	-2.33483	0.15209
31	llmg_0011-llmg_0011-MG945	-3.48295	NA	NA	0.598026	1.06409	0.372395	4	-1.43636	0.753001
32	llmg_0012-pth-mg7284	0.53135	0.298897	0.0141536	0.12173	-0.0148723	0.145664	6	1.2006	0.0793165
33	llmg_0013-mfd-MG948	-0.0281125	-5.44494	0.945851	-0.101598	0.155072	0.224273	6	-2.03042	0.493586
34	llmg_0015-llmg_0015-mg7288	-0.367467	-0.501495	-0.311154	-0.382352	-0.0596556	-0.101537	6	-1.33279	0.00947693
35	llmg_0016-llmg_0016-mg7289	-0.219699	-0.274571	-0.471356	-0.449027	-0.141203	0.0202037	6	-1.29168	0.0202556
36	llmg_0017-llmg_0017-mg7291	-0.352482	-0.478732	-0.239357	-0.328228	0.0279346	0.173	6	-1.22097	0.10675
37	llmg_0018-llmg_0018-MG954	0.0488987	NA	0.440208	-0.565242	0.396399	0.266632	5	1.12455	0.557623
38	llmg_0019-mesJ-MG955	-0.223147	NA	NA	NA	-0.506772	-0.159077	3	-1.34492	0.109111
39	llmg_0020-hpt-MG956	0.46294	0.200321	0.264051	0.175236	0.263064	0.161832	6	1.28991	0.00245674
40	llmg_0021-ftsH-MG957	-0.285741	0.45957	0.0304543	0.227071	0.10293	0.0880381	6	1.10929	0.346544
41	llmg_0021-ftsH-MG958	-0.0631879	-0.018463	0.0593757	0.0085037	-0.0431171	-0.0899039	6	-1.02477	0.313106
42	llmg_0022-mtlA-MG1406	-0.149296	NA	-0.480734	NA	NA	NA	2	-1.37028	NA
43	llmg_0022-mtlA-mg6770	0.593346	1.17172	NA	-0.146264	NA	NA	3	1.71532	0.292765
44	llmg_0023-mtlR-MG1407	-0.755909	NA	NA	NA	0.672964	NA	2	-1.04234	NA
45	llmg_0024-mtlF-MG1408	NA	0.620511	NA	NA	NA	-1.65678	2	-1.6789	NA
46	llmg_0025-mtlD-MG1409	NA	0.48228	NA	-0.765797	-0.583012	NA	3	-1.33488	0.53528
47	llmg_0028-ps128-mg6763	NA	NA	1.0607	-0.24175	NA	NA	2	1.50602	NA
48	llmg_0029-ps127-MG1412	-0.168193	NA	NA	3.95517	-0.644539	-0.386664	4	1.99161	0.573253
49	llmg_0030-ps126-MG1414	NA	NA	-0.413045	NA	-0.0141154	0.0647754	3	-1.12839	0.499863
50	llmg_0032-ps124-mg6759	-1.18679	NA	-0.557978	NA	NA	0.129224	3	-1.71346	0.292185
51	llmg_0033	NA	NA	NA	NA	NA	NA	0	#VALUE!	NA
52	llmg_0034-ps122-MG150007	-0.341562	-0.269034	-0.188835	-0.230889	-0.49276	-0.541094	6	-1.41062	0.00205455
53	llmg_0034-ps122-MG150007B	-0.704602	-2.16023	0.578635	0.270267	-0.54055	0.828949	6	-1.33365	0.549747
54	llmg_0034-ps122-MG150025	-0.193796	-0.0455699	-0.350954	-0.0733142	-0.518812	-0.566591	6	-1.33844	0.0239195
55	llmg_0034-ps122-MG150025B	-0.2755	-0.754789	-0.114165	-0.935188	0.251336	1.38832	6	-1.07609	0.838297
56	llmg_0035	0.290768	NA	0.0662663	-3.95493	NA	NA	3	-3.31779	0.476257
57	llmg_0036-ps120-MG1849	0.10865	NA	-0.388409	3.30441	-0.127923	0.0182728	5	1.79141	0.442993
58	llmg_0037	NA	0.646935	0.0632261	-1.95918	NA	NA	3	-1.5164	0.650653
59	llmg_0038-ps118-MG150027	0.311573	1.17089	0.736721	-0.418606	0.524096	-0.758796	6	1.2982	0.418254
60	llmg_0039-ps117-MG150236	NA	NA	NA	-2.75867	1.5217	NA	2	-1.85611	NA
61	llmg_0039-ps117-MG150236B	-0.158226	-0.128275	-0.447419	-0.462941	-0.415404	-0.638463	6	-1.45517	0.00538321
62	llmg_0040-ps116-MG150237	-0.0233599	2.51167	NA	0.312684	NA	NA	3	2.54381	0.361103
63	llmg_0041-ps115-MG1854	-0.0107402	0.232241	0.0690206	0.0843026	0.154772	0.281978	6	1.14484	0.0289363
64	llmg_0042-ps114-mg5624	0.465773	-1.01307	0.0671119	0.0138269	0.0852015	0.130479	6	-1.04266	0.846605
65	llmg_0043-ps113-MG150389	0.136007	-0.295744	0.173485	0.0229434	0.194316	0.313249	6	1.09495	0.341015
66	llmg_0044-ps112-MG150028	-0.00448784	0.17578	0.0683942	0.0293805	-0.00455517	0.0305368	6	1.0504	0.135247
67	llmg_0045-ps111-MG2737	-1.53702	0.169783	0.182185	0.492321	0.423109	0.248512	6	-1.00352	0.99142
68	llmg_0046-ps110-MG150238	-0.152024	-0.0718291	-0.0158242	-0.0442113	0.0931259	0.0775952	6	-1.01904	0.639618
69	llmg_0047	0.708364	0.278056	0.315251	0.402175	0.676651	0.379009	6	1.58394	0.00176073
70	llmg_0048	0.0323878	0.031671	0.375379	0.381072	0.405222	0.249559	6	1.27875	0.0181336
71	llmg_0051-ps105-mg6789	-2.82613	NA	NA	2.68499	1.15576	0.268566	4	1.37823	0.800354
72	llmg_0052	-0.032212	0.819669	0.272617	0.79918	0.418573	0.401056	6	1.5628	0.0198412
73	llmg_0053	0.0638714	-1.06675	0.591746	0.671435	0.828895	0.998287	6	1.41611	0.314023
74	llmg_0055-ps101-MG150029	-0.699589	-0.414349	0.290046	0.544549	1.48408	1.23642	6	1.50209	0.303578
75	llmg_0055-ps101-MG2710	0.00926863	-0.667965	0.216607	-0.0424414	0.0595157	0.0399044	6	-1.06629	0.631839
76	llmg_0056-llmg_0056-MG2707	-0.175948	NA	-0.577314	NA	-0.233683	0.788731	4	-1.0508	0.876515
77	llmg_0057-llmg_0057-MG150240	-0.458348	-0.52944	-0.0300178	0.399178	0.210911	0.0869245	6	-1.05492	0.737995
78	llmg_0059-llmg_0059-MG2703	-0.125027	-0.0848926	0.154142	-0.18639	0.180958	-0.237908	6	-1.05112	0.519845
79	llmg_0060-llmg_0060-MG150033	1.13959	-3.80019	0.494679	0.67164	-0.335813	-0.997704	6	-1.60208	0.549664
80	llmg_0061-llmg_0061-MG2701	NA	-1.05602	NA	0.0732072	-1.3896	0.000810086	4	-1.80923	0.207655
81	llmg_0062-llmg_0062-MG150241	NA	NA	NA	NA	0.216227	0.199612	2	1.23111	NA
82	llmg_0063-llmg_0063-MG150242	-5.28495	1.37692	0.0035978	-0.679196	1.77999	-0.348026	6	-1.69093	0.632268
83	llmg_0063-llmg_0063-MG2699	NA	0.437309	0.0925277	NA	NA	-0.285395	3	1.08489	0.733886
84	llmg_0065-llmg_0065-MG2479	NA	NA	-1.47125	NA	-0.854976	NA	2	-3.19988	NA
85	llmg_0066-araT-MG2478	0.0126026	0.41576	0.613644	0.594708	1.18433	0.599151	6	1.76833	0.01412
86	llmg_0067-recO-MG2476	3.47072	NA	-0.250011	NA	NA	NA	2	5.00459	NA
87	llmg_0069-llmg_0069-MG2474	0.167972	0.0634021	-0.104395	NA	-0.300802	-0.124741	5	-1.06153	0.502101
88	llmg_0070-llmg_0070-MG2472	NA	NA	NA	NA	NA	NA	0	#VALUE!	NA
89	llmg_0071-pdhD-MG2470	-0.239866	-0.451049	-0.633832	-0.476812	-0.358692	-0.303821	6	-1.50784	0.000833849
90	llmg_0071-pdhD-MG2471	-0.227959	-0.311892	-0.643473	-0.71377	-0.729419	-0.69263	6	-1.73879	0.00174111
91	llmg_0072-pdhC-MG2469	0.196002	-0.125386	-0.372846	-0.343359	-0.327998	-0.323745	6	-1.24138	0.0614069
92	llmg_0073-pdhB-MG2468	-1.84061	-0.221232	-0.256937	-0.233528	-0.287675	-0.453002	6	-1.73123	0.0891074
93	llmg_0074-pdhA-MG2467	-0.113387	-0.186764	-0.134949	-0.00561152	-0.121301	-0.0387	6	-1.1053	0.0141015
94	llmg_0075-lplL-MG2466	-0.224615	-0.504475	-0.499417	-0.400784	-0.143431	-0.168979	6	-1.38212	0.00483729
95	llmg_0076-llmg_0076-MG2464	-3.81374	-3.17933	-0.580721	-0.474783	-0.825792	-0.587991	6	-4.84069	0.0501989
96	llmg_0077-llmg_0077-mg7061	0.0520241	-0.377336	-0.467077	-0.438303	0.0219205	-0.118674	6	-1.24762	0.0692866
97	llmg_0078-llmg_0078-MG150243	0.611089	-0.282125	-0.128909	-0.292164	-0.248085	0.192135	6	-1.02498	0.873416
98	llmg_0079-trpS-mg14038s	1.26875	0.965802	NA	1.20579	-0.918435	-0.205451	5	1.5893	0.348257
99	llmg_0080-osmC-MG1190	-0.453307	-0.250224	-0.192624	0.0165122	-0.599732	-0.468439	6	-1.38353	0.0165583
100	llmg_0081-llmg_0081-MG1188	-0.796047	-0.2056	-0.397983	-0.164232	-0.061076	0.0136501	6	-1.30806	0.0755439
101	llmg_0083-plsX-MG1186	-0.0579134	-0.414475	-0.100668	-0.305075	-0.278304	-0.475926	6	-1.31267	0.0102386
102	llmg_0084-llmg_0084-MG1185	-0.287698	-0.173455	-0.158484	-0.139429	-0.207839	-0.24434	6	-1.22369	0.000314807
103	llmg_0085-llmg_0085-MG1184	NA	0.246255	-0.26434	-0.0829652	-0.082771	-0.271239	5	-1.09528	0.387384
104	llmg_0085-llmg_0085-mg5334	NA	NA	NA	NA	NA	NA	0	#VALUE!	NA
105	llmg_0086-llmg_0086-MG150244	0.464383	NA	0.186284	NA	0.419486	-1.40727	4	-1.08793	0.861932
106	llmg_0087-llmg_0087-mg5332	0.269998	-0.788125	NA	NA	NA	NA	2	-1.29572	NA
107	llmg_0089-llmg_0089-MG1271	-3.33837	-1.69866	-0.17399	-0.300019	0.060721	0.197274	6	-2.40009	0.182258
108	llmg_0090-llmg_0090-MG1270	1.19946	-0.232494	1.74344	0.391466	0.659711	-0.167908	6	1.8202	0.116592
109	llmg_0091-cysD-MG1266	0.448539	0.0935086	0.401329	0.370378	0.296515	0.382563	6	1.39395	0.00137104
110	llmg_0092-llmg_0092-mg8513	-0.336407	-0.357509	-0.043656	0.069945	-0.211681	-0.0178979	6	-1.16129	0.0949574
111	llmg_0093-llmg_0093-MG150191	-0.408167	-0.379571	-0.277955	-0.320554	-0.597811	-0.561359	6	-1.52842	0.000478889
112	llmg_0094-llmg_0094-MG150034	-0.29687	-0.337444	-0.326532	-0.424993	-0.405378	-0.40818	6	-1.44277	1.29118e-05
113	llmg_0095-llmg_0095-MG150167	0.384971	0.287158	-0.519536	-0.466611	-0.288877	0.0516417	6	-1.09623	0.587309
114	llmg_0096-llmg_0096-MG150137	-0.605107	-0.339697	-0.333856	-0.254231	-0.0230729	0.159482	6	-1.26206	0.0865272
115	llmg_0097-llmg_0097-MG150192	0.351499	-0.295926	-0.560096	-0.51864	0.0552707	-0.0475853	6	-1.18441	0.294567
116	llmg_0098-rpmG-MG150035	-1.07269	-0.870432	-0.596554	-0.368944	-1.36153	-0.57241	6	-2.24139	0.00297275
117	llmg_0099	-0.893338	-0.455102	-0.323215	-0.421979	-0.356507	-0.363018	6	-1.59817	0.00298347
118	llmg_0100-cadA-MG158	-1.23393	0.313291	0.64902	0.694671	-0.0792132	0.172915	6	1.08994	0.778129
119	llmg_0100-cadA-MG159	-0.291131	-0.0912852	0.0540967	-0.0182444	0.291389	0.237746	6	1.0309	0.743533
120	llmg_0101-llmg_0101-MG155	NA	1.90021	-3.61279	NA	NA	-3.36441	3	-5.43211	0.44588
121	llmg_0102-parA-MG154	0.135595	0.501635	0.171723	0.205817	0.0744906	-0.816659	6	1.04648	0.813555
122	llmg_0103-cshA-mg8565	-4.46429	1.05971	0.126397	0.0275548	-2.82614	0.743957	6	-2.43222	0.373812
123	llmg_0103-cshA-mg8566	-0.136451	0.293318	0.507956	-0.290185	0.227327	0.125839	6	1.12896	0.355465
124	llmg_0104-llmg_0104-MG1203	-0.392499	0.558776	0.0417453	-0.22263	0.259597	0.164193	6	1.07058	0.645686
125	llmg_0105-llmg_0105-mg8568	0.047153	-0.0620807	0.00758842	0.0437283	-0.0440318	0.0915944	6	1.01409	0.584364
126	llmg_0106-llmg_0106-MG1153	-0.570655	-1.33593	-0.0208643	0.563636	0.0196202	-0.0680204	6	-1.26537	0.414536
127	llmg_0106-llmg_0106-MG1154	0.065234	-0.300728	0.0308615	-0.117466	0.143663	-0.0174344	6	-1.03318	0.633205
128	llmg_0107-llmg_0107-MG150245	0.0919629	-0.144084	0.554111	0.177897	0.164469	0.35285	6	1.22083	0.0940415
129	llmg_0108-llmg_0108-MG1156	-0.132829	0.010814	0.302667	2.25514	0.112988	-0.20165	6	1.47874	0.350384
130	llmg_0109-llmg_0109-MG1157	NA	NA	-0.170696	NA	-0.0998424	-0.290003	3	-1.20544	0.0780044
131	llmg_0110-prmA-MG1158	0.519092	0.0396805	0.427017	0.329606	0.242621	0.184118	6	1.3369	0.00916649
132	llmg_0111-llmg_0111-mg8576	0.520069	0.273731	0.579957	0.0314811	0.257414	0.0706993	6	1.33495	0.0255431
133	llmg_0112-llmg_0112-MG1161	-0.0450156	0.448291	0.37244	0.454022	0.2341	0.30671	6	1.34325	0.0117356
134	llmg_0113-relA-MG1162	-0.151976	-0.0959027	-0.0144385	0.112951	0.177022	0.211877	6	1.04073	0.542232
135	llmg_0113-relA-MG1163	-0.462352	-0.534818	0.277066	0.46743	-0.0178312	0.24135	6	-1.00487	0.978131
136	llmg_0114-llmg_0114-MG1164	NA	NA	NA	1.83585	2.24653	-0.0418849	3	3.84523	0.196023
137	llmg_0114-llmg_0114-mg8580	-0.738291	-0.2372	0.41172	0.167525	0.444033	-0.0985044	6	-1.00849	0.964958
138	llmg_0115-dtd-MG2217	NA	1.66931	0.0599825	0.461857	0.239226	0.725851	5	1.87995	0.0891037
139	llmg_0116-llmg_0116-mg8582	0.230505	0.174811	0.0552556	0.120451	0.076211	0.0595479	6	1.12689	0.00899557
140	llmg_0117-llmg_0117-MG150168	0.0681636	-0.0346899	0.129093	0.124279	0.120877	0.0324025	6	1.07611	0.0402812
141	llmg_0118-ctrA-MG252	0.373542	0.67852	1.53863	1.56591	1.47107	1.48314	6	3.27113	0.00255874
142	llmg_0119-llmg_0119-MG254	-3.12419	-1.22992	-0.242603	-0.945125	-0.404411	0.020245	6	-2.68497	0.0879581
143	llmg_0120-rmaD-MG255	-1.52089	-0.870674	0.255202	-0.666629	-0.130186	-0.146186	6	-1.67067	0.106085
144	llmg_0123-acpD-mg5679	-0.076311	0.413615	-0.0461691	-0.521646	-0.242154	-0.506934	6	-1.17735	0.302929
145	llmg_0124-secA-MG104	0.871632	0.509224	0.352474	-0.311285	-0.180839	-0.934207	6	1.0525	0.855276
146	llmg_0125-aroF-MG102	1.32574	1.05408	0.350031	0.237919	-0.114114	0.334507	6	1.70124	0.0621249
147	llmg_0126-ptsH-MG150246	0.268799	0.17313	0.366113	0.332251	0.0972319	0.0540404	6	1.24019	0.00897512
148	llmg_0127-ptsI-mg5686	0.0259644	0.15208	0.174784	0.132455	0.0750867	0.0699314	6	1.11077	0.00628831
149	llmg_0128-llmg_0128-MG150247	-0.326769	-0.200599	0.113081	0.0841234	-0.0245057	-0.015569	6	-1.06365	0.415235
150	llmg_0129-llmg_0129-MG150248	-0.429541	NA	-0.0771328	-0.195779	-0.860782	-1.63979	5	-1.89763	0.0866705
151	llmg_0130-llmg_0130-mg8507	-0.357172	-0.579857	-0.246983	-0.163147	-0.102366	-0.12795	6	-1.30071	0.0161983
152	llmg_0131-llmg_0131-MG150138	-0.230416	-0.372528	-0.103387	-0.231174	-0.136022	-0.0521016	6	-1.20636	0.0103391
153	llmg_0131-llmg_0131-MG150193	-0.070121	0.0524107	-0.471465	-0.441968	-0.476161	-0.488725	6	-1.37164	0.0238706
154	llmg_0132-sugE-MG150249	0.243173	0.206336	0.183985	0.099197	-0.180623	-0.19239	6	1.06178	0.488976
155	llmg_0132-sugE-MG150249B	0.198047	-0.863692	0.348371	0.49201	-0.0316148	-0.159006	6	-1.00265	0.989843
156	llmg_0133-blt-mg8661	0.228697	-0.766784	1.6919	0.781986	-0.496656	0.232264	6	1.32124	0.477296
157	llmg_0134-llmg_0134-mg5064	NA	-0.592075	-0.343308	-0.0495887	-0.213703	-0.267544	5	-1.34077	0.0300019
158	llmg_0135-llmg_0135-MG28	NA	NA	NA	NA	NA	NA	0	#VALUE!	NA
159	llmg_0135-llmg_0135-mg5065	NA	NA	-0.30667	-1.08948	-0.166269	-0.526287	4	-1.68569	0.0824137
160	llmg_0136-llmg_0136-MG27	0.0199766	0.484395	-0.375502	0.324695	0.0253	-0.510158	6	-1.00523	0.974831
161	llmg_0136-llmg_0136-mg5066	-4.76761	-3.19074	NA	-0.84673	0.590251	-0.910059	5	-6.20267	0.127913
162	llmg_0137-llmg_0137-MG26	NA	NA	NA	NA	NA	NA	0	#VALUE!	NA
163	llmg_0137-llmg_0137-mg5068	0.599443	NA	NA	NA	NA	NA	1	1.8211	NA
164	llmg_0138-argG-MG24	1.4058	1.4176	3.39428	2.24052	1.37022	-0.0697647	6	5.08575	0.0175804
165	llmg_0139-argH-MG110	NA	0.842682	0.757568	NA	NA	1.51454	3	2.82431	0.049271
166	llmg_0140-pmrB-MG108	0.902363	-2.74591	-0.189897	-0.481637	-0.578136	NA	5	-1.85641	0.356038
167	llmg_0141-llmg_0141-MG106	-0.345825	-0.0336598	-0.297675	-0.213945	-0.309997	-0.282277	6	-1.28047	0.00307354
168	llmg_0142-llmg_0142-MG150250	-0.0743686	0.0362277	0.0686811	0.232469	0.204161	0.122746	6	1.10332	0.0871872
169	llmg_0143-llmg_0143-mg5076	0.105988	0.027425	-0.019803	-0.0270341	-0.000519088	0.00613767	6	1.01548	0.472255
170	llmg_0144-llmg_0144-MG82	-0.442518	-0.487394	0.032396	0.037222	-0.0886147	-0.107578	6	-1.19253	0.122162
171	llmg_0145-rpmH-MG150036	-0.287223	-0.423265	-0.297876	-0.396185	-0.350445	-0.105325	6	-1.3635	0.00112886
172	llmg_0146-llmg_0146-MG80	-1.22869	-0.47059	-0.444478	-0.418076	-0.331665	-0.395035	6	-1.72994	0.0104647
173	llmg_0147-llmg_0147-MG150251	-1.2677	NA	-0.371041	-0.395782	-0.28278	-1.13032	5	-1.99277	0.0303886
174	llmg_0148-llmg_0148-MG150037	NA	-0.346809	-0.0757257	0.0900561	0.326346	-0.148973	5	-1.03151	0.79828
175	llmg_0149-llmg_0149-MG2391	-0.852997	-0.655696	0.0436025	1.10817	2.71129	-0.0801026	6	1.46089	0.517111
176	llmg_0150-llmg_0150-MG150252	-0.547248	-0.441234	-0.193631	-0.11822	0.0194346	-0.0528043	6	-1.24893	0.059846
177	llmg_0151-llmg_0151-MG2389	-0.422589	-0.395084	-0.324943	-0.321471	-0.07676	-0.115935	6	-1.31802	0.00554459
178	llmg_0152-llmg_0152-mg5087	-0.599706	0.304336	-0.179107	-0.158846	-0.460894	-0.448654	6	-1.29323	0.109934
179	llmg_0153-llmg_0153-MG2387	-0.282558	NA	-0.526466	-1.10353	-0.814566	-1.57197	5	-2.36273	0.0187693
180	llmg_0154-cbr-MG2386	2.85057	NA	-1.21667	NA	-0.294469	NA	3	1.56279	0.75161
181	llmg_0155-llmg_0155-mg5090	NA	-1.67171	3.08389	0.528391	0.418195	1.03279	5	1.97054	0.422065
182	llmg_0156-dltE-MG2384	0.855443	-0.219267	-0.0379141	NA	NA	0.848427	4	1.43573	0.294593
183	llmg_0157-tetR-MG2383	0.041832	-0.410189	1.35543	-0.436644	-0.228791	0.0305656	6	1.06046	0.838055
184	llmg_0158-glgB-MG2382	-0.396838	NA	NA	NA	0.146882	NA	2	-1.13312	NA
185	llmg_0158-glgB-MG457	-3.36217	NA	0.120423	NA	-0.0422923	NA	3	-2.98823	0.436472
186	llmg_0159-llmg_0159-mg8524	NA	-1.611	0.150795	0.317547	NA	NA	3	-1.46358	0.599908
187	llmg_0160-llmg_0160-MG459	-0.00740458	0.612782	-0.130368	-0.44855	0.632345	0.154092	6	1.14509	0.471173
188	llmg_0161-llmg_0161-MG460	0.513472	NA	0.249017	-0.305868	0.199097	-1.52179	5	-1.18912	0.657505
189	llmg_0162-llmg_0162-MG461	0.299434	0.536512	0.32629	0.757269	0.0972313	0.158816	6	1.43705	0.0154398
190	llmg_0163-EpsR-mg8528	0.406951	1.0054	-0.384213	0.114058	NA	0.807217	5	1.47681	0.190817
191	llmg_0164-tgt-MG464	0.494676	0.280227	-0.279187	-0.375399	0.891483	-0.312609	6	1.12359	0.606808
192	llmg_0165-llmg_0165-MG465	-0.170364	1.97777	NA	-1.97502	NA	-0.92615	4	-1.31448	0.765275
193	llmg_0165-llmg_0165-mg8531	-0.836038	-0.261893	-0.318119	0.0808038	-0.426281	-0.387594	6	-1.43073	0.0312907
194	llmg_0167-llmg_0167-MG468	-0.838844	-1.47445	NA	-0.488119	-0.147111	-2.62871	5	-3.05093	0.063298
195	llmg_0168-llmg_0168-MG469	-0.606391	-0.526406	-0.271859	-0.175655	-0.493157	-0.326826	6	-1.4919	0.00203649
196	llmg_0169-llmg_0169-MG150253	-0.985675	0.621522	-0.831897	-0.360582	NA	-0.0583339	5	-1.38126	0.325208
197	llmg_0170-llmg_0170-MG473	0.824576	0.816363	-0.185492	-0.312528	0.167327	0.163571	6	1.27843	0.268909
198	llmg_0171-aspC-MG474	0.881362	1.21196	0.504237	0.824923	0.160648	0.620523	6	2.01498	0.00499747
199	llmg_0172-codY-MG475	-0.0232139	-0.397534	-0.208284	-0.434549	0.0429675	-0.190683	6	-1.2237	0.0497545
200	llmg_0173-llmg_0173-MG150038	NA	2.38642	0.111401	-2.07224	0.238637	-4.34504	5	-2.08791	0.555321
201	llmg_0174	0.040018	0.295173	0.145447	-0.102799	0.0764153	0.116402	6	1.09978	0.135041
202	llmg_0175-gatA-MG2551	-0.130263	-0.238913	0.0454239	0.0477296	0.0979077	-0.0215141	6	-1.03383	0.552032
203	llmg_0175-gatA-mg8548	-0.563673	0.847539	-0.289258	0.100795	0.0319449	0.346855	6	1.08224	0.710567
204	llmg_0176-gatB-MG2552	0.114683	0.29086	-0.0315727	0.146536	0.0497531	-0.02237	6	1.09561	0.123701
205	llmg_0177-llmg_0177-MG2553	-0.972278	-0.790948	-0.121833	-0.329812	-0.296451	-0.558041	6	-1.66789	0.0117372
206	llmg_0178-dinF-MG2554	NA	NA	-0.421924	-3.79744	-0.0315858	0.0484368	4	-2.85945	0.336949
207	llmg_0180-cspE-MG150039	0.159548	0.0698984	-0.0530928	-0.128596	-0.181144	-0.10691	6	-1.04086	0.484031
208	llmg_0181-llmg_0181-MG2558	0.270931	-0.456674	-0.502239	-0.607832	-0.713637	0.0443978	6	-1.38751	0.0965607
209	llmg_0182-llmg_0182-mg8558	-0.901237	0.131832	-0.0739993	-0.47665	0.0153989	-0.232691	6	-1.29204	0.159698
210	llmg_0183-llmg_0183-MG150194	-0.049395	-0.162772	-0.105217	-0.129192	-0.321708	-0.247978	6	-1.18457	0.00876006
211	llmg_0184-llmg_0184-mg5294	0.124227	0.268423	NA	NA	-0.128973	-0.398741	4	-1.03434	0.832856
212	llmg_0185-llmg_0185-MG2213	-1.07907	-0.437638	-0.448802	-0.110086	-0.16421	-0.409789	6	-1.55519	0.0257376
213	llmg_0186-llmg_0186-MG2215	NA	NA	0.0692539	-3.2366	-1.07115	0.378958	4	-2.62448	0.323646
214	llmg_0187-celB-mg5289	NA	-0.224783	0.941062	-1.21744	NA	0.27129	4	-1.05915	0.907378
215	llmg_0188-llmg_0188-MG150195	0.417912	0.172872	0.187658	0.201853	0.287207	0.233862	6	1.28432	0.00112973
216	llmg_0190-bglS-MG969	0.641247	NA	NA	NA	-0.711008	-1.04254	3	-1.44884	0.546316
217	llmg_0191-dut-MG970	0.0549124	-0.802504	0.276689	0.823725	0.273334	0.0267641	6	1.11496	0.636611
218	llmg_0192-llmg_0192-MG971	-0.87054	-0.169569	-0.444464	-0.0668598	-0.194808	-0.223537	6	-1.3886	0.040666
219	llmg_0193-llmg_0193-mg5283	-0.0295213	-0.122779	0.022138	-0.161465	-0.0493259	-0.141031	6	-1.08365	0.0416335
220	llmg_0194-llmg_0194-MG1905	0.814569	-0.138596	0.753981	0.734748	0.4285	0.482559	6	1.66967	0.0166486
221	llmg_0195-llmg_0195-MG1904	-0.160376	0.0522967	0.172248	0.231992	-0.473325	-0.299755	6	-1.08273	0.515721
222	llmg_0196-llmg_0196-MG1903	-0.572365	-0.527039	0.0409581	-0.209955	-0.449908	-0.321143	6	-1.40482	0.0151049
223	llmg_0197-menA-MG1902	-0.00206582	0.277603	-0.261157	-0.718672	-0.0697298	-1.11968	6	-1.3711	0.19312
224	llmg_0198-llmg_0198-MG1900	0.594657	0.165554	0.226841	0.0844548	-1.48457	-0.0530343	6	-1.08078	0.80278
225	llmg_0199-feoB-MG1899	-0.263504	NA	-1.07496	-1.04661	-0.967657	-0.40825	5	-2.12166	0.0120318
226	llmg_0199-feoB-mg5274	0.307056	0.0111194	-0.418222	-0.11574	-0.350454	0.0140769	6	-1.09639	0.436113
227	llmg_0200-feoA-MG1898	-1.11775	-1.02718	-0.821318	-0.95283	-0.757989	-0.759015	6	-2.47444	2.54513e-05
228	llmg_0201-msrB-MG1897	0.010499	-0.15893	0.0941928	-0.138178	-0.42793	-0.0751352	6	-1.1229	0.174971
229	llmg_0202-llmg_0202-MG1896	-0.154076	0.0956158	-0.0130458	0.0886774	-0.163503	-0.0814292	6	-1.03869	0.453926
230	llmg_0203-llmg_0203-MG1895	-0.184019	-0.211283	-0.0318145	0.073084	-0.109627	-0.100679	6	-1.09862	0.07729
231	llmg_0204-rpmB-MG150040	-0.68653	-0.741734	-0.403599	-0.417286	-0.328856	-0.650013	6	-1.71258	0.000647538
232	llmg_0205-llmg_0205-MG1893	-0.49626	-0.223161	-0.250395	-0.332766	-0.416686	-0.412277	6	-1.42655	0.000430716
233	llmg_0206-rmlA-mg5262	0.328103	0.212471	0.0770708	0.218003	0.0871009	0.156557	6	1.19708	0.00540418
234	llmg_0207-rmlC-mg5261	0.838256	0.311635	0.100179	0.136473	0.0771892	0.141601	6	1.30677	0.0744573
235	llmg_0208	0.551615	0.245241	0.383341	0.27285	0.164048	0.343086	6	1.38638	0.00189816
236	llmg_0209-rmlB-MG633	-0.168103	0.116901	0.157748	0.230971	0.0366122	0.0496307	6	1.07318	0.262774
237	llmg_0210-rmlD-MG632	0.170991	0.217888	0.173778	0.157029	0.099733	0.133957	6	1.17222	0.000193319
238	llmg_0211-rgpA-MG631	-2.35405	-1.77872	-0.0672414	-0.245973	0.0775406	-0.016537	6	-2.0768	0.150694
239	llmg_0212-rgpB-MG630	0.0207444	-0.416959	0.169083	0.105305	0.135195	0.00554643	6	1.00316	0.972804
240	llmg_0213-rgpC-MG629	0.217486	-0.574668	0.140466	-0.0273753	0.174708	0.094374	6	1.00417	0.973816
241	llmg_0214	0.268929	0.717424	0.502018	0.537457	0.530512	0.549344	6	1.67802	0.000312951
242	llmg_0214-rgpD-mg11426s	0.317421	0.350852	0.396067	0.232293	0.190068	0.336006	6	1.35498	0.000207141
243	llmg_0215-llmg_0215-MG365	0.0364665	0.735491	6.67476	0.70958	0.548613	0.0852648	6	4.32767	0.221463
244	llmg_0216-rgpE-MG366	0.838917	0.944143	0.287533	0.305712	0.385011	0.705748	6	1.78219	0.00440641
245	llmg_0217-rgpF-MG367	-0.342441	1.0257	-0.567705	NA	-0.964875	-0.293663	5	-1.25684	0.53273
246	llmg_0218-llmg_0218-MG368	0.127411	0.234562	0.315546	0.275546	0.334551	0.301429	6	1.30322	0.000357584
247	llmg_0219-llmg_0219-mg6284	0.488476	0.255817	0.70294	0.198061	0.898928	0.625865	6	1.69613	0.00484947
248	llmg_0220-llmg_0220-MG370	-0.0602692	0.106277	0.692512	0.864778	0.684776	0.485382	6	1.58763	0.0266996
249	llmg_0221-llmg_0221-MG900	NA	1.72194	NA	NA	0.896082	0.990531	3	3.3296	0.04399
250	llmg_0222-WefC-MG901	0.317461	0.290058	0.663701	0.580343	0.554888	0.545517	6	1.63558	0.000512302
251	llmg_0223-llmg_0223-MG902	NA	NA	NA	NA	0.645595	1.29635	2	2.64051	NA
252	llmg_0224-glf1-MG903	0.245337	0.275939	0.668907	0.703849	0.255712	0.514825	6	1.55908	0.00372783
253	llmg_0225-rfbX-MG904	-0.116703	0.492774	0.414084	0.699945	0.465956	0.356829	6	1.47032	0.0178922
254	llmg_0226-llmg_0226-MG905	0.362995	0.572887	0.495534	0.703741	0.41114	0.34506	6	1.61914	0.000362675
255	llmg_0227-llmg_0227-MG906	0.76404	0.0953009	0.736366	0.601914	0.538183	0.465351	6	1.70493	0.00300445
256	llmg_0228-llmg_0228-mg8328	0.585283	-0.652581	0.555736	0.987512	0.191437	0.295203	6	1.38694	0.207705
257	llmg_0229-llmg_0229-MG910	0.0574764	0.0420266	-0.296561	-0.152609	0.00907386	-0.0582383	6	-1.06873	0.286697
258	llmg_0230-guaB-MG911	0.17729	0.506919	0.18085	0.267333	0.0298877	0.22153	6	1.2594	0.0156044
259	llmg_0231-llmg_0231-MG912	0.404647	-1.00923	0.415134	1.51288	-0.388511	-0.561197	6	1.06427	0.872589
260	llmg_0232-llmg_0232-MG913	-0.431649	-0.393685	-0.330702	-0.385938	-0.256669	-0.417364	6	-1.44677	3.48866e-05
261	llmg_0233-hflX-MG914	NA	0.335942	-0.416594	-0.038721	-0.250401	-0.347871	5	-1.15434	0.350032
262	llmg_0234	-1.59075	0.188649	-2.28376	NA	2.97813	NA	4	-1.19355	0.889723
263	llmg_0235-llmg_0235-mg8339	0.147894	-1.03172	-0.161305	-0.215497	-0.810048	-0.363182	6	-1.50027	0.0726102
264	llmg_0236-nadD1-MG919	-0.326456	-0.263224	-0.13918	-0.288761	-0.176199	-0.198336	6	-1.26115	0.000527705
265	llmg_0237-llmg_0237-MG920	-0.783064	-0.202331	-0.388593	-0.14644	-0.135637	-0.225342	6	-1.3683	0.0266779
266	llmg_0238-llmg_0238-MG150196	-0.243167	-0.184378	0.0247308	0.054522	-0.0387526	-0.234611	6	-1.10917	0.115285
267	llmg_0239-llmg_0239-mg8346	-0.603962	-0.644565	-0.0946463	-0.258413	-0.200084	-0.129817	6	-1.37977	0.0222456
268	llmg_0240-llmg_0240-mg8347	0.36108	0.299776	-0.339783	-0.42546	0.361972	-0.49349	6	-1.0401	0.827717
269	llmg_0241-llmg_0241-MG1647	-0.761555	-0.293695	-0.22439	-0.594492	-0.113631	-0.484365	6	-1.50987	0.0091074
270	llmg_0242-llmg_0242-MG1648	-0.519536	-0.705513	-0.258212	-0.287749	-0.485101	-0.158841	6	-1.49555	0.00462994
271	llmg_0244-ung-MG1651	-0.175985	-0.263694	0.0281046	-0.262264	-0.222467	-0.138718	6	-1.18828	0.012016
272	llmg_0245-llmg_0245-MG1652	-0.356495	0.0864738	-0.418492	-0.420635	0.169155	-0.599049	6	-1.29241	0.098202
273	llmg_0246-llmg_0246-MG1653	-0.190027	NA	-0.474768	NA	0.313339	-2.2049	4	-1.89475	0.326898
274	llmg_0247-llmg_0247-MG1654	-0.121421	-1.19945	-0.474737	-0.696452	-0.204279	-0.0467815	6	-1.57962	0.0503855
275	llmg_0248-llmg_0248-MG2776	0.168435	0.0392071	-0.617476	-0.889115	0.300819	-0.0259929	6	-1.18612	0.417097
276	llmg_0249-llmg_0249-mg8361	NA	-0.558217	-0.0660646	NA	NA	NA	2	-1.36635	NA
277	llmg_0250-rmeC-MG2200	-0.649638	0.186771	NA	1.16555	0.229564	-2.80255	5	-1.45363	0.607276
278	llmg_0251-rpsU-MG150041	-0.646097	-1.14363	-0.19493	-0.322676	-0.192407	0.0279736	6	-1.50977	0.0619374
279	llmg_0252-llmg_0252-mg8365	-0.46526	0.00349361	-0.324777	-0.342021	-2.32085	0.269773	6	-1.69883	0.21646
280	llmg_0253-pgk-MG2291	0.0486076	0.0554285	0.317688	0.16427	-0.220022	-0.186194	6	1.03042	0.735491
281	llmg_0254-hadL-mg8369	-0.775252	0.381948	0.543026	0.852041	0.510857	-1.06406	6	1.07763	0.826068
282	llmg_0255-dhaK-MG2296	-4.74116	-0.219939	-0.218543	NA	0.0264652	0.145902	5	-2.72224	0.345651
283	llmg_0257-dhaM-mg8375	NA	-0.941172	-0.919396	-1.08141	0.378457	-0.408886	5	-1.81209	0.0913721
284	llmg_0258-llmg_0258-mg8376	-1.54699	0.0748172	-0.186635	-0.232205	-0.36642	-0.3843	6	-1.55315	0.115457
285	llmg_0260-pepDA-MG2306	0.124914	-0.975742	0.184737	0.33329	0.130159	0.120607	6	-1.01377	0.946877
286	llmg_0262-llmg_0262-MG2309	-2.50089	-0.554454	0.485019	-0.274019	-0.659718	-1.03644	6	-2.13134	0.121374
287	llmg_0263-llmg_0263-MG2310	-0.723504	NA	0.00718083	-0.704248	-0.343178	-0.458796	5	-1.55972	0.0295408
289	llmg_0264-fbp-mg11467s	0.369755	0.310926	0.261521	0.494504	0.236036	-0.261457	6	1.26518	0.0776596
288	llmg_0264-fbp-MG2311	0.664411	NA	-2.20229	0.671524	NA	NA	3	-1.3348	0.79127
290	llmg_0265-llmg_0265-MG2312	NA	NA	NA	NA	NA	NA	0	#VALUE!	NA
291	llmg_0266-llmg_0266-MG2313	0.471127	-1.2921	0.13444	0.0570194	1.64593	0.251916	6	1.23539	0.605418
292	llmg_0267-llmg_0267-mg7944	-0.129109	0.0279895	0.0767034	-0.0135834	-0.221731	0.072489	6	-1.0317	0.552395
293	llmg_0268-llmg_0268-MG2317	NA	-1.53702	0.153338	NA	-1.99997	-0.270982	4	-2.49343	0.171083
294	llmg_0269-llmg_0269-MG2318	-0.880178	NA	NA	-0.876972	-0.626637	-0.622921	4	-2.12055	0.00197479
295	llmg_0270-llmg_0270-MG2319	-0.421078	-0.35624	0.323788	-0.323546	-0.310835	-0.117926	6	-1.22259	0.134986
296	llmg_0271-llmg_0271-MG2320	-0.236813	0.944676	-1.08245	-0.277587	-0.0500339	-0.0364712	6	-1.13101	0.662013
297	llmg_0272	0.474475	0.358052	-0.00437106	0.000582114	-0.0699687	-0.0546976	6	1.12451	0.27768
298	llmg_0273-luxS-MG2322	-0.933783	-0.40418	0.38891	-0.117499	-0.109277	-0.126636	6	-1.24244	0.275928
299	llmg_0274-llmg_0274-mg11477s	-0.384642	0.0634938	-0.233468	-0.0857064	-0.20799	0.0327711	6	-1.14559	0.110116
300	llmg_0276-llmg_0276-MG2325	-0.289032	-0.396822	-0.262216	-0.147563	-0.239644	-0.214866	6	-1.2948	0.000625467
301	llmg_0277-llmg_0277-mg7928	0.167463	0.254086	0.183103	0.104091	0.200398	0.133002	6	1.18969	0.000465731
302	llmg_0278-llmg_0278-mg7926	-0.0754135	-0.161513	0.0244884	-0.0545462	0.0204028	-0.0767884	6	-1.05537	0.116418
303	llmg_0279-llmg_0279-MG150254	-0.219287	-0.784251	0.0462656	-0.0424545	-0.0705286	-0.0125716	6	-1.19778	0.211693
304	llmg_0280-acmA-MG1991	-0.00152861	0.0617204	-0.0234	-0.101695	-0.114693	-0.0583789	6	-1.04046	0.201388
305	llmg_0281-llmg_0281-MG1992	-0.0355922	0.0777339	0.111266	0.126434	-0.237882	-0.276246	6	-1.03982	0.615163
306	llmg_0282-nrdG-MG1993	-0.25491	-0.157422	0.094382	0.332601	-0.269348	-0.258402	6	-1.08928	0.434891
307	llmg_0283-llmg_0283-MG1994	-0.514211	0.139317	0.187645	-0.00261692	-0.0741254	-0.134817	6	-1.06873	0.545902
308	llmg_0284-llmg_0284-MG1995	-0.421224	-0.13823	-0.107422	-0.170623	-0.122782	-0.117463	6	-1.19677	0.014678
309	llmg_0286-llmg_0286-MG2000	-0.53581	-0.507162	-0.505851	0.221228	-0.799457	-1.41606	6	-1.80492	0.0411632
310	llmg_0287-cbiO3-MG2623	0.310603	-0.981194	-0.498527	-0.760733	-1.02883	-0.469582	6	-1.7707	0.0358645
311	llmg_0288-cbiO2-MG2624	-0.796053	-3.35795	0.075388	-0.756304	-0.689248	-0.181717	6	-2.58825	0.11687
312	llmg_0289-cbiQ2-MG2625	0.069723	-0.656202	-0.55476	-0.256217	-0.335185	-0.179728	6	-1.37538	0.0309243
313	llmg_0290-llmg_0290-MG2626	-0.247716	-0.407837	-0.294289	-0.128036	-0.316593	-0.431071	6	-1.35562	0.00109792
314	llmg_0291-dapD-MG2627	0.718637	0.0709772	0.382404	2.06904	0.302757	0.578614	6	1.98788	0.0647491
315	llmg_0292-hipO1-MG2629	0.96471	0.267842	1.18683	0.662843	0.85672	0.815319	6	2.20864	0.00153438
316	llmg_0293-xynD-MG2630	-0.491747	-0.227532	-0.0762327	0.0285495	0.0375043	0.00883321	6	-1.12761	0.215325
317	llmg_0295-llmg_0295-MG150008	0.211725	0.528228	-0.43213	-0.605539	0.254975	-0.100156	6	-1.0241	0.898695
318	llmg_0295-llmg_0295-MG150255	-0.728323	0.187766	-0.271445	-0.195664	-0.075416	-0.349998	6	-1.26978	0.112725
319	llmg_0295-llmg_0295-mg7581	0.196451	-0.00282661	-0.287618	-0.330437	-0.15992	0.0657736	6	-1.09027	0.354716
320	llmg_0296-rpsD-MG1840	-0.352482	0.064146	-0.350541	-0.363169	-0.413574	-0.388817	6	-1.35086	0.00950333
321	llmg_0297-tex-MG1837	-0.366501	0.221183	-0.29659	-0.423128	-0.0703207	-0.2838	6	-1.22531	0.092792
322	llmg_0297-tex-MG1838	0.0561728	0.0584836	-0.190901	-0.210787	-0.115263	-0.0501921	6	-1.07833	0.176981
323	llmg_0298-llmg_0298-MG1836	0.384471	0.423425	-0.0494285	-0.0170523	0.0266713	-0.00817409	6	1.13502	0.211323
324	llmg_0299-add-MG1835	0.921358	1.30556	0.35048	0.803435	0.873718	0.706488	6	2.28608	0.00126756
325	llmg_0300-llmg_0300-MG1834	-0.226742	0.402668	0.501697	-0.325766	-0.453625	-1.01624	6	-1.20483	0.456608
326	llmg_0301-llmg_0301-mg11615s	0.53651	-0.455438	-0.497477	-0.66449	-3.12785	-5.44481	6	-4.99743	0.138793
327	llmg_0302-llmg_0302-MG1831	-0.366703	-0.38108	-0.193761	0.185212	-0.123809	-0.189458	6	-1.19514	0.0874865
328	llmg_0302-llmg_0302-MG1832	0.348327	0.25705	0.136474	0.116875	-0.298289	-0.145074	6	1.07168	0.520231
329	llmg_0304-llmg_0304-MG150256	-0.138451	0.536767	0.28561	0.273343	0.00606741	0.0461184	6	1.18322	0.151037
330	llmg_0305-llmg_0305-MG150042	NA	-1.2321	0.0417492	-3.56918	NA	-0.952122	4	-4.16998	0.158522
331	llmg_0306-llmg_0306-mg7598	-0.0855998	-0.488858	-0.161841	-0.0518009	-0.154873	-0.0993228	6	-1.18972	0.0448972
332	llmg_0307-llmg_0307-mg7599	0.190508	0.122995	0.134029	0.10583	0.036034	-0.00895585	6	1.10157	0.0215214
333	llmg_0308-rimI2-MG1144	0.365946	0.511262	-0.301872	0.333287	-0.11028	-0.38187	6	1.07188	0.674236
334	llmg_0309-gcp-MG1143	-0.128289	-0.19604	0.160877	0.129692	-0.0757207	-0.123946	6	-1.03967	0.548163
335	llmg_0310	-1.87617	-0.473147	1.23776	-0.872514	NA	-2.56972	5	-2.48621	0.234767
336	llmg_0311-llmg_0311-MG1140	-0.53649	-0.177903	-0.253158	-0.289125	-0.00599515	-0.0552861	6	-1.24565	0.0366769
337	llmg_0312-phnD-MG1139	NA	NA	-1.0674	NA	NA	NA	1	-2.90782	NA
338	llmg_0312-phnD-mg7606	-0.353486	-0.142516	-0.267161	-0.308088	-0.243458	-0.220501	6	-1.29158	0.0003532
339	llmg_0313-phnC-MG1138	-0.505874	-2.43995	-0.409411	-0.483566	-0.132504	-0.885102	6	-2.24656	0.063465
340	llmg_0314-phnB-MG1137	-0.233876	-0.279113	-0.467292	-0.609875	-0.502978	-0.402805	6	-1.51587	0.000799889
341	llmg_0315-llmg_0315-MG1136	-1.45629	NA	0.156658	-0.212552	-3.59892	-0.479734	5	-3.05924	0.173117
342	llmg_0316-cpdC-MG1135	0.138816	-0.186783	-0.688206	-0.462013	-0.372789	-0.496356	6	-1.41136	0.0325541
343	llmg_0317	0.80171	-0.50332	0.993713	0.933793	0.0371379	0.3002	6	1.53297	0.137336
344	llmg_0318-tpx-MG1133	-0.403701	0.0225022	-0.0572881	0.138563	0.032522	-0.0644861	6	-1.05687	0.498818
345	llmg_0319-pepN-MG1132	0.460579	0.433898	0.82496	0.0986546	0.350082	0.403134	6	1.53503	0.00648492
346	llmg_0319-pepN-mg8659	-1.0115	-0.662028	-0.245181	-0.239946	-0.374904	0.0427227	6	-1.51458	0.0406732
347	llmg_0320-napC-MG1131	-0.0682921	-0.256853	1.2231	NA	0.739696	0.469525	5	1.52415	0.192127
348	llmg_0321-napB-MG1129	0.0233692	-1.41669	-0.0259418	-0.112468	0.105524	0.17843	6	-1.23117	0.435153
349	llmg_0322-llmg_0322-MG1128	-0.187211	-0.298316	0.198612	0.0781128	0.152828	0.106913	6	1.00853	0.921991
350	llmg_0323-llmg_0323-MG150257	-0.116618	-0.200025	0.123624	0.278305	-0.0577591	-0.0622688	6	-1.00581	0.938597
351	llmg_0324-lmrC-MG1182	-0.234396	-0.204292	-0.0117477	0.193775	0.0829198	0.0940009	6	-1.01338	0.857845
352	llmg_0325-LmrD-mg5454	0.350832	0.338882	0.232168	0.379354	0.0717615	0.0274856	6	1.2629	0.0129681
353	llmg_0326-murA1-MG2488	-0.126764	-0.245057	-0.345623	-0.33952	-0.171717	-0.141526	6	-1.25655	0.00224572
354	llmg_0327-llmg_0327-MG150258	-0.139853	-0.175805	-0.123737	-0.109492	-0.454856	-0.514699	6	-1.28798	0.0190562
355	llmg_0328-llmg_0328-MG2490	1.30869	NA	-0.866753	NA	NA	0.338936	3	1.29731	0.719256
356	llmg_0329-llmg_0329-MG923	-2.13325	NA	NA	0.367948	-0.254955	-0.753658	4	-2.00067	0.283362
357	llmg_0330-llmg_0330-MG924	NA	NA	NA	0.0389879	NA	NA	1	1.03976	NA
358	llmg_0332-llmg_0332-MG926	-0.197502	-0.122725	0.234563	0.586954	-0.153042	-0.158808	6	1.03208	0.815838
359	llmg_0333-llmg_0333-MG927	0.0397724	-0.0915489	0.00787076	-0.281768	-0.460122	-0.497213	6	-1.23842	0.0754505
360	llmg_0334-llmg_0334-MG928	-0.602246	-1.05462	-0.0176281	0.073707	-0.502551	-0.67189	6	-1.5881	0.0444037
362	llmg_0335-plpA-mg5437	0.540591	1.16525	1.34305	1.50581	0.387921	0.346439	6	2.41454	0.00859251
361	llmg_0335-plpA-MG681	NA	0.208118	NA	NA	NA	NA	1	1.23136	NA
363	llmg_0336-plpB-MG682	1.07002	0.850971	1.02756	2.24955	0.330987	0.416062	6	2.69355	0.016921
364	llmg_0338-plpC-MG150139	1.09337	1.27751	1.47739	1.59325	0.639853	0.663723	6	3.0777	0.0010353
365	llmg_0338-plpC-MG150139B	1.21064	1.22428	1.23115	1.509	0.454807	0.448752	6	2.75414	0.00265316
366	llmg_0339-dar-MG686	0.854309	0.756932	1.39372	1.44629	0.26935	0.451441	6	2.3679	0.00706679
367	llmg_0340-plpD-MG687	1.2099	1.2655	-0.188508	0.564449	0.327423	-0.647932	6	1.52471	0.231463
368	llmg_0341-llmg_0341-MG688	1.29464	0.472713	0.485905	0.634144	0.42861	0.260503	6	1.815	0.0100549
369	llmg_0342-llmg_0342-MG689	0.553675	0.618668	0.337623	0.706923	0.337503	0.189501	6	1.57983	0.00245221
370	llmg_0343-llmg_0343-MG690	0.183351	0.405463	0.715696	0.351634	0.411325	0.0841747	6	1.43133	0.0101067
371	llmg_0344-cbiO-MG692	-1.36167	-1.47304	-0.489127	1.39753	-0.0311441	0.0652875	6	-1.37075	0.499092
372	llmg_0344-cbiO-MG693	NA	-2.42684	0.0423055	-0.294648	1.20928	1.72366	5	1.05206	0.947268
373	llmg_0345-cbiQ-MG694	-0.616341	0.10888	NA	-0.242234	NA	NA	3	-1.28389	0.355058
374	llmg_0346-fhuC-MG696	-3.23551	-0.452256	-0.796533	-0.163531	-2.31169	-1.42421	6	-4.04422	0.0340157
375	llmg_0347-fhuB-MG697	1.53513	2.91249	NA	-0.619073	NA	NA	3	3.58294	0.340174
376	llmg_0348-fhuG-MG698	0.177544	-0.835762	-0.412232	-0.587256	-0.5007	-0.55526	6	-1.57189	0.0223813
377	llmg_0349-fhuD-MG700	0.485437	-1.3284	-0.492747	-0.276059	-0.510535	-0.370591	6	-1.5151	0.139632
379	llmg_0350-fhuR-mg5414	-0.122733	-0.386525	-0.101074	0.0456905	-0.017514	0.105144	6	-1.08275	0.312234
378	llmg_0350-fhuR-MG701	NA	-3.13575	NA	NA	NA	NA	1	-23.006	NA
380	llmg_0351-llmg_0351-MG702	1.96845	1.3956	0.311119	0.104933	-1.15286	-2.09209	6	1.09329	0.891496
381	llmg_0352-llmg_0352-MG703	1.25754	NA	NA	-0.57432	NA	0.183706	3	1.33506	0.64111
382	llmg_0353-llmg_0353-mg11685s	-1.28417	0.000481338	-0.0529352	0.334285	-0.417955	0.387231	6	-1.18789	0.525371
383	llmg_0354-llmg_0354-mg5410	-0.304439	-1.32742	-0.230072	-0.193016	0.160339	0.700733	6	-1.22016	0.497701
384	llmg_0355-pmg-MG706	-0.108002	0.126114	0.313712	0.337421	0.199792	0.0861053	6	1.17256	0.0637921
385	llmg_0356-ahpC-MG707	-0.356532	-0.026662	-0.20502	-0.0254221	-0.310979	-0.26681	6	-1.21966	0.0190744
386	llmg_0357-ahpF-mg5405	0.209159	0.219696	-0.0366762	-0.0669095	-0.0906845	-0.135301	6	1.01669	0.806166
387	llmg_0358-pbp2B-mg5403	0.128237	-0.0224049	0.0135888	0.0874841	0.178734	0.0371587	6	1.07301	0.0703373
388	llmg_0358-pbp2B-mg5404	0.0475197	-0.207514	-0.230173	0.183531	0.11408	0.250885	6	1.02674	0.761773
389	llmg_0359-recR-MG1099	0.373917	0.334341	0.12131	0.0982751	0.202074	0.142985	6	1.23633	0.00650451
390	llmg_0360-llmg_0360-mg5398	0.807337	0.106954	-0.0246863	0.579968	-0.0133726	-0.208657	6	1.23112	0.25485
391	llmg_0361-murF-MG111	0.209003	0.622086	-0.63004	-0.142455	-0.639287	-0.229962	6	-1.14466	0.529298
392	llmg_0362-dppA-MG112	NA	1.40761	NA	NA	NA	NA	1	4.0862	NA
393	llmg_0364-dppB-MG115	0.196902	-4.28289	NA	NA	-0.464576	2.30258	4	-1.75417	0.709862
394	llmg_0365-dppC-MG116	0.268606	1.0394	NA	-0.022302	NA	NA	3	1.53506	0.308701
395	llmg_0366-dppD-MG117	NA	NA	NA	-1.10563	NA	NA	1	-3.02114	NA
396	llmg_0367-dppF-MG118	-0.22571	0.311762	-0.443993	-0.078259	NA	-0.486652	5	-1.2027	0.270738
397	llmg_0368-prfC-MG119	-0.893903	-0.0305126	-0.154777	-0.119159	0.0866917	0.000286448	6	-1.20349	0.260513
398	llmg_0369-rheA-MG120	-0.655333	-0.643204	-0.0816056	-0.0147819	-0.41813	-0.45248	6	-1.45876	0.0196537
399	llmg_0369-rheA-mg5310	-0.189723	-0.00111673	-0.0888379	0.0157008	-1.21395	-0.398171	6	-1.36709	0.161801
400	llmg_0371-eraL-MG123	-0.858219	-0.0320794	-0.4359	-0.655685	-0.300894	-0.233057	6	-1.52091	0.018568
401	llmg_0372-asnB-mg8674	0.759395	NA	1.88168	1.00984	2.0343	1.71427	5	4.39249	0.00416179
402	llmg_0373-fpg-MG1263	0.624095	0.731898	0.34201	0.129372	0.283948	-0.103571	6	1.39742	0.0454317
403	llmg_0374-recA-MG21	-0.254299	-0.964828	0.0280901	-0.130881	-0.0744229	-0.113689	6	-1.28617	0.14848
404	llmg_0374-recA-mg8680	0.151694	-0.556441	-0.182677	-0.0646524	-0.437924	-0.25794	6	-1.25189	0.0835881
405	llmg_0375-llmg_0375-MG18	1.19429	1.25616	0.0769604	0.390792	0.642164	0.591611	6	1.9977	0.0140704
406	llmg_0376-llmg_0376-MG17	1.1805	1.17872	0.135579	-0.151679	0.856497	0.752643	6	1.9323	0.0328066
407	llmg_0377-llmg_0377-MG150260	-0.0621213	-0.163086	-0.00337109	0.0345764	-0.0285826	0.0445679	6	-1.03011	0.385162
408	llmg_0378-llmg_0378-mg6286	NA	NA	-0.0119299	NA	0.661049	-0.791731	3	-1.04869	0.920176
409	llmg_0379-llmg_0379-MG722	-0.398441	-2.09227	-0.251562	-0.492891	-0.43101	-0.180535	6	-1.8986	0.0811154
410	llmg_0380-llmg_0380-MG721	-0.150728	-0.709625	-0.157943	0.173111	0.19403	-0.0389912	6	-1.1219	0.430816
411	llmg_0381-llmg_0381-MG720	0.471884	1.33846	-2.85258	0.0377571	-2.67377	0.179229	6	-1.79171	0.451203
412	llmg_0382-llmg_0382-MG719	-0.605313	-0.299305	-0.182167	0.334307	-0.0110025	-0.377244	6	-1.2094	0.210721
413	llmg_0383-ppnK-MG718	-0.182866	-0.148654	-0.188337	-0.126805	-0.125501	-0.144366	6	-1.16504	3.58808e-05
414	llmg_0384-rluE-MG717	0.0845955	-0.615917	-0.198166	-0.220314	-0.194854	-0.282834	6	-1.2686	0.0486909
415	llmg_0385-ppiA-MG716	0.148783	-0.467491	0.0548717	0.264212	-0.0500996	-0.0116858	6	-1.01029	0.92438
416	llmg_0386-lysQ-MG715	1.08286	1.17888	1.00114	1.22216	1.33202	1.44115	6	3.35248	8.64638e-06
417	llmg_0387-llmg_0387-MG714	-3.10426	0.763437	0.706295	0.382957	-0.155996	0.07456	6	-1.24878	0.723892
418	llmg_0388-apbE-MG713	0.0294321	0.509612	0.715546	0.203466	-0.192553	-0.102925	6	1.21381	0.240843
419	llmg_0389-lysS-MG710	-0.304356	-0.256725	0.117757	0.0856961	-0.0155628	0.00302134	6	-1.06364	0.432926
420	llmg_0390-rlrG-MG709	-0.0781394	0.400331	0.527032	0.461546	0.363934	0.520458	6	1.44175	0.0108499
421	llmg_0391-llmg_0391-mg6302	0.0591332	0.0820184	-0.515894	-0.551111	-0.381713	-0.440251	6	-1.33817	0.0551368
422	llmg_0392-ldhB-mg5785	-0.2552	-1.46393	0.0206706	-0.0334884	-0.133586	-0.108626	6	-1.38962	0.212311
423	llmg_0393-rlrD-MG2199	-0.38971	-0.7118	0.288358	NA	-0.717065	0.431769	5	-1.24569	0.420656
424	llmg_0394-llmg_0394-MG538	0.476392	NA	-1.5344	NA	NA	NA	2	-1.69724	NA
425	llmg_0395-thiI-mg5781	0.559175	0.362208	-0.0109802	-0.278588	-0.264262	-0.393234	6	-1.00429	0.979395
426	llmg_0396-llmg_0396-MG2801	1.12164	0.742855	NA	-0.597703	0.156466	NA	4	1.42734	0.412425
427	llmg_0396-llmg_0396-mg5780	-0.253733	0.561784	-0.610626	-0.421364	-0.328238	-0.218878	6	-1.23595	0.255461
428	llmg_0397-llmg_0397-mg7349	0.133351	0.131476	0.254028	0.196528	0.187051	0.260371	6	1.21385	0.000373664
429	llmg_0398-llmg_0398-mg7347	0.24837	0.353451	0.377153	0.458572	0.716502	0.686522	6	1.60549	0.00167879
430	llmg_0399-nha-MG2793	-1.27507	-5.48619	0.359378	-0.0057649	-0.0637293	-0.225254	6	-3.05294	0.271112
431	llmg_0399-nha-MG2794	-0.226737	-0.594944	0.487079	0.425609	0.0557865	0.216121	6	1.06235	0.73426
432	llmg_0400-llmg_0400-MG2792	NA	NA	NA	NA	NA	NA	0	#VALUE!	NA
433	llmg_0400-llmg_0400-mg7343	0.0955884	0.0815047	-0.170667	-0.184093	-0.11334	-0.0782942	6	-1.06348	0.273185
434	llmg_0401-tyrS-mg7342	-0.295666	-0.134351	-0.235101	-0.252678	-0.0897399	-0.185566	6	-1.22	0.00147558
435	llmg_0402-pbp1B-MG2062	-0.493007	-0.587599	-0.305378	-0.477439	0.0971773	0.0205401	6	-1.3377	0.0555474
436	llmg_0403-pepA-MG2061	0.0489018	-0.131341	0.00971886	0.117218	-0.194853	-0.229791	6	-1.06541	0.322842
437	llmg_0405-llmg_0405-MG150197	-0.144104	-0.123782	0.346145	0.328032	0.163894	0.176098	6	1.13245	0.213473
438	llmg_0406-trxH-mg7335	-0.242386	-0.0850231	0.391248	0.164019	-0.0223238	0.0964139	6	1.05161	0.598376
439	llmg_0407-pheT-MG2057	-0.272606	-0.383908	0.0731331	0.188726	-0.0764703	0.0256059	6	-1.07708	0.440737
440	llmg_0408-noxE-MG2056	0.00115569	0.0269955	-0.768872	-0.791348	-0.882014	-0.916505	6	-1.74211	0.0281032
441	llmg_0409-ssbA-mg7332	0.931661	NA	NA	NA	0.35772	0.18752	3	1.63608	0.160277
442	llmg_0410-groES-MG150261	-0.0110418	-0.271988	-0.221047	-0.0774681	0.392893	0.377851	6	1.03204	0.800522
443	llmg_0411-groEL2-MG2053	-0.0883521	-0.0459275	0.0935082	0.115069	0.333229	0.195408	6	1.10571	0.173749
444	llmg_0412-vicX-MG2052	-0.468687	-0.344539	-0.4149	-0.354742	-0.608843	-0.636906	6	-1.60229	0.000257786
445	llmg_0413-kinC-MG2049	-0.125704	-0.121006	-0.0203734	0.0484026	-0.0714222	0.13562	6	-1.02608	0.565952
446	llmg_0413-kinC-MG2050	0.338158	0.417771	-0.0678554	-0.113717	-0.215812	-0.315164	6	1.00726	0.955312
447	llmg_0414-llrC-MG2048	-0.0324706	-0.103256	0.00543241	-0.0272434	-0.268043	-0.18082	6	-1.10635	0.0660007
448	llmg_0415-tmk-MG2047	-0.286466	-0.335353	-0.277232	-0.222628	-0.111018	-0.144485	6	-1.25801	0.00133655
449	llmg_0416-holB-MG2046	-0.365432	-0.528817	-0.3628	-0.248679	-0.0484215	-0.145678	6	-1.32751	0.0100741
450	llmg_0417-llmg_0417-MG2045	0.376196	0.472299	-0.0616973	-0.183351	-0.227776	-0.13432	6	1.04105	0.759008
451	llmg_0418-llmg_0418-mg7315	-0.177574	0.0722774	-0.121858	-0.206563	-0.0306028	0.107367	6	-1.0613	0.315798
452	llmg_0419-llmg_0419-MG2043	-0.148771	-0.147352	0.174882	-0.0971731	0.0117314	0.146596	6	-1.01006	0.872156
453	llmg_0420-llmg_0420-MG150043	0.103558	NA	-0.350629	0.00953066	-0.87422	-0.486511	5	-1.37665	0.144555
454	llmg_0421-drrB-MG2041	0.272732	NA	-1.20929	0.27465	NA	NA	3	-1.24687	0.699026
455	llmg_0422	1.7191	0.0617391	-1.67388	-2.1841	2.09766	-0.460087	6	-1.07601	0.921795
456	llmg_0423-drrA-MG2039	NA	0.265174	-0.428964	-0.138953	0.012088	-0.761093	5	-1.23411	0.302145
457	llmg_0424-llmg_0424-MG2038	0.0346041	0.0361528	-0.0653858	0.103611	-0.130534	0.022743	6	1.0002	0.99559
458	llmg_0425-mvk-MG2036	-0.384546	-0.434608	-0.538212	-0.536633	-0.730152	-0.619806	6	-1.71714	0.000128255
459	llmg_0425-mvk-MG2037	-0.0990292	-0.0644525	-0.426334	-0.360939	-0.359289	-0.430554	6	-1.33656	0.00759724
460	llmg_0426-mvaD-MG2035	-0.439053	-0.789431	-0.34346	-0.154245	-0.279257	-0.335074	6	-1.47711	0.0069718
461	llmg_0427-llmg_0427-MG2034	NA	NA	NA	NA	NA	NA	0	#VALUE!	NA
462	llmg_0427-llmg_0427-mg5554	-0.621295	0.288529	-0.475662	-1.71512	-0.622232	-0.197918	6	-1.74592	0.0946917
463	llmg_0428-fni-MG2032	0.0476917	0.0454919	-0.270198	-0.277425	-0.399944	-0.72485	6	-1.30109	0.0777188
464	llmg_0429-sodA-MG2030	0.119514	-0.0449612	0.051886	0.00497479	-0.429605	-0.490444	6	-1.14047	0.272099
465	llmg_0430-cstA-MG2027	-2.30003	0.342068	NA	NA	-1.92246	0.44043	4	-2.36316	0.32192
466	llmg_0430-cstA-MG752	-1.90914	2.46591	0.051346	NA	0.0561309	-0.0994551	5	1.11959	0.878874
467	llmg_0431-llmg_0431-MG754	0.12186	0.27031	-0.371855	-1.37475	0.0922516	-0.188358	6	-1.27349	0.37013
468	llmg_0432-llmg_0432-MG755	-0.0824494	NA	0.689442	0.618215	-0.467472	-0.0208991	5	1.15878	0.540964
469	llmg_0433-rheB-MG756	-0.0553959	-0.260257	-0.25427	-0.26162	-0.0919289	0.0298803	6	-1.16059	0.0345408
470	llmg_0434-llmg_0434-MG757	-0.039614	-0.444559	-0.256967	-0.031368	-0.128238	-0.00898526	6	-1.16372	0.0808724
471	llmg_0435-hexR-MG759	-0.556379	-0.466738	-0.290683	-0.358599	-0.159435	-0.262361	6	-1.4177	0.0019402
472	llmg_0437-ptcB-mg5538	-0.813137	-0.397233	-0.0480825	-0.0385713	-0.549875	-0.670388	6	-1.52127	0.0242252
473	llmg_0438-ptcA-mg13888s	-0.357223	-0.128503	-0.276554	-0.115565	-0.477594	-0.604768	6	-1.38639	0.00905307
474	llmg_0439-llmg_0439-mg5535	NA	NA	NA	NA	NA	NA	0	#VALUE!	NA
475	llmg_0440-ptcC-mg8585	-0.0535401	0.0271786	-0.205014	-0.0252134	0.0458269	0.139451	6	-1.01196	0.8114
476	llmg_0441-bglA-mg8588	0.0973389	-0.267292	-0.0366429	-0.0392685	-0.103443	-0.242075	6	-1.10358	0.139941
477	llmg_0443	-0.478792	-2.84881	0.531291	-1.09874	NA	-3.3398	5	-4.25022	0.116768
478	llmg_0444-ligA-MG641	-0.571746	-0.591744	-0.49046	-0.42379	-0.252213	-0.313693	6	-1.55365	0.000537206
479	llmg_0445-llmg_0445-MG642	0.118513	-0.18844	-0.0984968	-0.326341	-0.460601	-0.263166	6	-1.22518	0.0552141
480	llmg_0446-msmK-MG644	-1.83908	-1.30377	0.23384	0.509197	-0.654793	-0.501675	6	-1.80889	0.164109
481	llmg_0447-nifJ-MG646	0.546778	0.519971	0.468679	0.537167	0.31208	0.329726	6	1.57208	0.000135053
482	llmg_0448-llmg_0448-MG647	0.491869	-0.340454	-0.00802207	-0.127769	-0.0995264	-0.0544492	6	-1.02333	0.846519
483	llmg_0449-llmg_0449-MG150262	-0.00960065	0.117881	0.128937	0.500344	0.277918	0.0302541	6	1.1904	0.0724386
484	llmg_0450-llmg_0450-MG649	0.147979	-0.0811954	0.00696957	-0.118742	-0.166218	-0.0596607	6	-1.04618	0.364855
485	llmg_0451-femD-MG650	0.796641	0.621498	-0.0265679	0.0831445	-0.27513	-0.272585	6	1.16707	0.443481
486	llmg_0452-treR-mg8602	-1.9452	-0.917028	-0.129804	-0.13058	-0.117648	0.0584838	6	-1.69944	0.153765
487	llmg_0453-llmg_0453-mg8603	0.634926	0.213861	1.61877	1.57913	-2.06785	-0.269223	6	1.32968	0.632821
488	llmg_0454-llmg_0454-MG1699	-0.226432	-0.952097	1.40122	1.0565	-0.387316	-0.551329	6	1.0584	0.888873
489	llmg_0455-TrePP-mg8606	NA	-2.25925	2.52147	-0.205601	-3.21424	0.589912	5	-1.6712	0.641537
490	llmg_0455-TrePP-mg8608	NA	0.940386	-0.690354	-0.151427	-1.15614	0.41627	5	-1.13684	0.749517
491	llmg_0456-pgmB-MG618	0.778442	NA	NA	NA	NA	NA	1	2.17808	NA
492	llmg_0457-llmg_0457-MG617	-0.212086	-0.324564	-0.280472	-0.416283	-0.599329	-0.269741	6	-1.41965	0.00165662
493	llmg_0458-llmg_0458-MG616	-0.459049	-0.174989	0.277697	0.0347374	-0.219471	-0.166786	6	-1.12522	0.299693
494	llmg_0459-llmg_0459-MG615	-0.632248	-2.44949	-0.150742	0.0616569	0.220087	-0.0808332	6	-1.65742	0.268662
495	llmg_0460-llmg_0460-MG614	0.0200317	-0.0878524	-0.184673	-0.0684079	-0.14867	-0.15258	6	-1.10926	0.0190873
496	llmg_0461-lytR-MG613	-0.752759	-0.713727	-0.124984	-0.253438	0.126667	0.130166	6	-1.30301	0.159107
497	llmg_0462-truA-MG612	-0.463718	-0.59992	-0.0354018	-0.0465837	0.0590922	-0.0468684	6	-1.20792	0.149672
498	llmg_0463-thiD2-MG611	-0.549037	-0.398417	-0.0176662	0.102927	0.0894237	0.0367743	6	-1.13051	0.331229
499	llmg_0464-llmg_0464-MG610	0.246607	-0.972591	0.0513544	-0.0583019	0.186304	0.209059	6	-1.05787	0.777977
500	llmg_0465-llmg_0465-MG609	-0.0671281	-0.221962	0.126882	0.174909	0.093225	0.11742	6	1.03793	0.573306
501	llmg_0466-aspC-MG608	-0.318796	-0.0358518	0.221142	0.259312	0.291867	0.11748	6	1.09329	0.390555
502	llmg_0467-pyrG-MG606	0.14851	-0.5354	-0.15175	-0.33522	-0.326736	-0.359814	6	-1.29702	0.0418395
503	llmg_0467-pyrG-mg8624	0.19883	-0.0356106	-0.0837709	0.136304	-0.390555	-0.298987	6	-1.08217	0.443852
504	llmg_0468-llmg_0468-MG605	-0.740211	-2.12872	-0.0684151	-0.470128	-0.592584	-0.730484	6	-2.19992	0.0401568
505	llmg_0469-llmg_0469-MG604	0.983244	NA	1.20574	NA	NA	NA	2	2.98766	NA
506	llmg_0470-llmg_0470-MG603	-0.213873	-1.42735	0.12421	-0.0101671	-0.1636	-0.0680627	6	-1.34063	0.262066
507	llmg_0471-llmg_0471-MG601	0.516147	0.494775	-0.164709	0.0111939	0.0152158	-0.053898	6	1.1462	0.305967
508	llmg_0472-llmg_0472-MG600	NA	-0.0997205	-0.756063	-0.159128	-1.31597	1.35948	5	-1.21444	0.686322
509	llmg_0473-llmg_0473-MG598	NA	NA	NA	NA	1.62143	NA	1	5.06033	NA
510	llmg_0473-llmg_0473-MG599	NA	-1.59035	NA	-0.245528	-1.09189	NA	3	-2.65361	0.130777
511	llmg_0474-llmg_0474-MG597	NA	NA	4.35459	NA	NA	0.3145	2	10.3247	NA
512	llmg_0475-llmg_0475-MG596	NA	NA	NA	-0.676367	NA	NA	1	-1.96672	NA
513	llmg_0476-llmg_0476-MG595	-0.167557	0.58713	0.390064	0.61754	-0.366863	-0.013398	6	1.19063	0.349587
514	llmg_0477-llmg_0477-MG150044	-0.279058	-0.090841	-0.471793	-0.421411	-0.870114	-0.814599	6	-1.63444	0.0106019
515	llmg_0478-ntd-MG593	NA	NA	NA	NA	-2.01932	NA	1	-7.53318	NA
516	llmg_0479-llmg_0479-mg6797	-0.05454	0.497416	-0.864421	-0.422445	0.0333832	-0.542823	6	-1.25304	0.304453
517	llmg_0480-dukA-MG590	-0.0619059	0.420651	0.145307	0.693182	-0.126922	-0.436987	6	1.11133	0.55188
518	llmg_0481-llmg_0481-MG589	0.816513	0.61717	0.28922	0.126	0.519234	0.4396	6	1.59673	0.00528721
519	llmg_0482-llmg_0482-MG588	0.970642	1.00274	-0.151591	0.308556	0.888208	0.325464	6	1.74602	0.0332183
520	llmg_0483-dnaE-MG584	0.796234	0.843504	0.158256	-0.387707	0.0212087	0.117316	6	1.29451	0.241886
521	llmg_0483-dnaE-MG586	0.138372	0.114179	0.0445424	-0.000883998	0.0383889	-0.0155333	6	1.05462	0.0877582
522	llmg_0483-dnaE-MG587	-0.762488	-0.996451	-0.229548	-0.895082	-0.0234581	0.131186	6	-1.58826	0.0654777
523	llmg_0484-llmg_0484-mg6791	0.339294	NA	0.0560445	1.16123	-0.38229	1.31618	5	1.64558	0.199478
524	llmg_0485-llmg_0485-MG150263	0.381027	NA	1.29974	-1.28952	NA	0.855874	4	1.36586	0.619964
525	llmg_0486-llmg_0486-MG150264	0.242074	-0.0526489	-0.0482462	0.0321681	-0.411577	-0.489422	6	-1.12894	0.333546
526	llmg_0486-llmg_0486-MG150264B	0.245783	-0.02807	-0.423477	-0.608368	-0.242256	0.0519556	6	-1.18223	0.25294
527	llmg_0487-llmg_0487-mg6479	-1.2101	0.0330086	-0.0912595	1.46107	NA	NA	4	1.04936	0.935442
528	llmg_0488-llmg_0488-MG559	1.36934	-0.431042	NA	0.042569	NA	NA	3	1.38674	0.605696
529	llmg_0489-llmg_0489-MG561	NA	NA	NA	NA	0.574147	NA	1	1.77561	NA
530	llmg_0490-llmg_0490-MG562	NA	NA	-0.457748	-0.558652	-0.843494	-0.0507041	4	-1.61228	0.0619459
531	llmg_0491-hly-MG563	-0.821973	-0.210466	-0.212494	-0.0135999	-0.135755	-0.116254	6	-1.28628	0.0857983
532	llmg_0492-llmg_0492-MG564	0.158072	0.192198	-0.0923286	-0.052875	-0.0367659	-0.0382793	6	1.02191	0.679281
533	llmg_0493-llmg_0493-MG565	1.14875	0.452704	-0.050649	0.582336	0.208011	-0.386746	6	1.38505	0.194928
534	llmg_0494-nagZ-MG566	0.794092	0.731593	0.101134	0.060306	0.373587	0.282569	6	1.47779	0.0276265
535	llmg_0495-llmg_0495-MG567	0.297927	-0.261922	0.113586	0.287253	0.213005	-0.435588	6	1.03636	0.789066
536	llmg_0496-hllA-MG150265	0.366932	-0.0447843	-0.0229556	0.285655	-0.558903	-0.529006	6	-1.08746	0.622832
537	llmg_0496-hllA-MG150265B	-0.246887	-0.267502	0.0186333	0.00409659	-0.101324	-0.0703687	6	-1.1169	0.0776328
538	llmg_0497-llmg_0497-mg5742	NA	0.372806	-0.528568	0.0791921	0.552848	0.174716	5	1.13905	0.517928
539	llmg_0498-ogt-MG1113	-1.08672	-0.685281	0.273062	NA	-0.166271	0.403432	5	-1.28705	0.42232
540	llmg_0499-adaA-MG1114	-2.08963	0.931781	0.70578	1.89488	0.37228	0.26014	6	1.41322	0.551437
541	llmg_0500-nhoA-MG1115	0.564007	0.46217	0.293791	-0.0742364	0.0306198	0.216767	6	1.28255	0.0552289
542	llmg_0501-llmg_0501-MG1116	NA	-1.79204	NA	NA	0.43759	-1.91208	3	-2.97084	0.290167
543	llmg_0502-llmg_0502-MG1117	-2.33955	NA	-2.32076	-2.20448	-1.76632	-2.16346	5	-8.66173	3.14485e-05
544	llmg_0503-llmg_0503-MG1118	-0.496246	NA	-1.59687	-1.11939	-1.06826	-0.820652	5	-2.77398	0.00492636
545	llmg_0504-llmg_0504-mg5734	-4.00619	-0.943601	NA	-1.12023	-1.6389	-1.45626	5	-6.25285	0.030163
546	llmg_0505-nifZ-MG1120	-0.422989	-0.525234	-0.709633	-0.793301	-0.554293	-0.638282	6	-1.83545	0.000102724
547	llmg_0506-llmg_0506-MG1121	NA	-0.737585	-0.538934	0.571699	0.0503619	-0.564638	5	-1.27611	0.373264
548	llmg_0507-llmg_0507-MG1122	-0.155442	0.147585	-0.322175	-0.247506	-0.580352	-0.40505	6	-1.29757	0.0491605
549	llmg_0507-llmg_0507-MG1123	-0.111884	-0.0789177	0.0563996	-0.241376	-0.506264	-0.522501	6	-1.26376	0.0601174
550	llmg_0508-llmg_0508-MG1124	-1.04832	-0.650855	-0.377389	-0.327004	-0.459727	-0.510253	6	-1.75463	0.0033842
551	llmg_0509-acmD-mg5726	-0.927238	NA	-0.131285	-1.73401	0.0375139	-0.0161501	5	-1.74061	0.181184
552	llmg_0510-llmg_0510-mg5725	0.418252	-0.037124	0.263032	0.301129	0.212664	0.212268	6	1.25655	0.0138249
553	llmg_0511-ponA-MG2249	0.714848	0.671848	NA	-1.10098	NA	0.00287365	4	1.07481	0.87561
554	llmg_0511-ponA-mg5724	1.06156	-1.16683	-0.107566	0.0618622	-0.0792557	0.00582823	6	-1.03811	0.902
555	llmg_0511-ponA-mg6547	-0.404013	-0.254658	0.243868	0.219557	0.203074	0.196492	6	1.03464	0.782178
556	llmg_0512-recU-MG762	-0.32701	-0.120118	-0.00783002	0.0331705	-0.245171	-0.206794	6	-1.15676	0.0515243
557	llmg_0513-llmg_0513-MG2252	NA	-1.26282	2.28304	-0.197972	0.0243532	-0.420911	5	1.08887	0.892437
558	llmg_0514-llmg_0514-MG2253	-0.229681	-0.758328	-0.136916	-0.131947	-0.150327	0.0118234	6	-1.26183	0.0878892
559	llmg_0515-llmg_0515-MG150045	-0.480083	NA	0.299203	0.580691	0.227224	0.0100762	5	1.1359	0.511779
560	llmg_0516-suhB-mg6552	0.0288124	-0.0286404	0.242628	0.219522	0.427713	0.333258	6	1.22615	0.0357347
561	llmg_0517-murA2-MG1638	-0.174768	-0.472195	0.361851	0.394789	0.346345	0.247397	6	1.12439	0.458275
562	llmg_0518	0.407762	0.418038	0.0585743	0.0789006	0.120977	0.115124	6	1.22128	0.0323097
563	llmg_0519-tig-MG1640	0.140447	0.539154	0.130586	0.196619	-0.136211	-0.085065	6	1.13988	0.239817
564	llmg_0520-dnaG-MG1659	-0.205457	0.0844435	0.0158779	0.14998	0.226493	0.0138548	6	1.04868	0.468065
565	llmg_0521-rpoD-MG1660	0.0442585	0.240664	0.247895	0.15882	0.0352292	0.0523398	6	1.13868	0.0239339
566	llmg_0522-llmg_0522-MG1661	NA	0.872804	0.110644	-0.94314	0.162936	NA	4	1.05212	0.900575
567	llmg_0523-glpT-MG1662	-1.61883	-1.09497	-0.344124	-0.64834	0.022125	0.0900418	6	-1.82033	0.0785972
568	llmg_0524-llmg_0524-MG1663	0.436328	NA	-1.42257	0.344708	0.837336	0.790711	5	1.21811	0.660183
569	llmg_0525-llmg_0525-MG150266	-2.57885	-1.30287	0.611819	-0.15138	0.600559	0.326711	6	-1.51538	0.46201
570	llmg_0526-llmg_0526-MG1665	-0.109884	-0.192703	-0.946395	-0.635588	0.066286	0.00647211	6	-1.35252	0.124813
571	llmg_0527-llmg_0527-mg7485	0.0677645	-0.0111242	0.482202	0.423548	0.44789	0.421505	6	1.35703	0.0183437
572	llmg_0528-clpE-MG1667	0.261417	0.222886	0.313789	0.279235	0.209277	0.181537	6	1.27723	6.40844e-05
573	llmg_0529-llmg_0529-MG150198	-5.0489	0.129248	-0.121886	-0.0965374	-0.247369	-0.362173	6	-2.60631	0.295885
574	llmg_0530	0.592738	0.51293	-0.261797	-0.0345948	-0.188358	-0.317542	6	1.05186	0.770039
575	llmg_0531	NA	1.09352	-2.51411	NA	NA	NA	2	-2.03459	NA
576	llmg_0532-llmg_0532-mg13713s	-1.86302	-0.341413	0.0432001	0.114439	-0.250548	-0.00278879	6	-1.4672	0.263754
577	llmg_0533-nudH-mg5744	-0.712803	-0.00472034	-0.131679	-0.0519677	-0.223064	-0.183728	6	-1.24358	0.0909598
578	llmg_0534-uvrB-mg5745	-0.230207	0.612291	0.10606	0.115376	0.00731396	0.045456	6	1.11559	0.377351
579	llmg_0534-uvrB-mg8113	-0.123565	-0.159373	0.17886	0.390211	0.127645	0.317227	6	1.12957	0.241802
580	llmg_0535-gltS-mg5132	1.05308	-0.0688728	0.0586998	0.86473	0.366953	1.5961	6	1.9062	0.0566818
581	llmg_0536-argE-MG150140	1.25617	1.57854	1.53434	1.36344	0.547028	0.263008	6	2.97553	0.00467895
582	llmg_0538-llmg_0538-MG150199	-0.0201892	-0.155496	0.0478395	0.11652	-0.0873117	0.033377	6	-1.01094	0.797536
583	llmg_0539-fabI-mg5146	-0.0199031	0.115982	-0.0107634	-0.192356	0.0133681	0.00330902	6	-1.01517	0.726766
584	llmg_0540-oxaA2-MG150141	0.248429	-0.00522686	0.101056	0.101546	0.252328	0.358113	6	1.19249	0.0227984
585	llmg_0541-llmg_0541-mg5128	0.21224	0.0541669	-0.543093	0.00255541	-0.179621	-0.191614	6	-1.11356	0.360299
586	llmg_0542-llmg_0542-mg5127	0.37581	0.201522	0.105295	NA	0.166682	0.207161	5	1.23528	0.00930149
587	llmg_0543-dfpA-MG150200	0.524881	0.315062	0.297655	0.345569	0.153432	0.147171	6	1.34621	0.00343773
588	llmg_0544-dfpB-MG150169	0.300933	0.373752	0.241398	0.264012	0.144758	0.259955	6	1.3023	0.000346443
589	llmg_0546-xylH-MG150046	0.932958	-0.0563896	0.761068	-0.0457245	0.24068	0.0704281	6	1.37324	0.128923
590	llmg_0547-ctpE-MG125	0.178106	0.201619	0.308329	0.210933	0.179875	0.23339	6	1.24447	0.000105797
591	llmg_0547-ctpE-MG126	1.22509	0.245417	0.342459	0.903864	0.12698	0.222581	6	1.66707	0.0376436
592	llmg_0547-ctpE-mg5625	-0.093804	0.609315	0.160226	0.15131	0.288046	-0.0288681	6	1.19846	0.137914
593	llmg_0548	0.756944	0.733207	0.0404559	-0.0447325	0.409214	0.440443	6	1.47588	0.0365625
594	llmg_0551-llmg_0551-MG1405	-0.455147	NA	-1.1298	NA	0.0684371	NA	3	-1.65782	0.282303
595	llmg_0552-llmg_0552-mg5918	0.0201923	-0.884976	0.310917	0.402089	0.108091	0.0314259	6	-1.00205	0.991725
596	llmg_0553-llmg_0553-MG150267	-1.70955	-0.286251	-0.159869	0.157876	-0.66944	-0.300885	6	-1.63998	0.122199
597	llmg_0555-tdk-mg7991	0.219997	-0.0854941	-0.125623	0.127852	0.0861446	0.0281061	6	1.04272	0.468889
598	llmg_0556-llmg_0556-MG794	-0.355453	NA	0.468153	0.36088	0.299272	0.390835	5	1.26205	0.194605
599	llmg_0557-prfA-MG793	0.294203	-0.274084	0.611589	-7.84174e-05	0.14699	0.281931	6	1.19334	0.208271
600	llmg_0558-llmg_0558-mg6250	-0.186552	-0.0856431	0.245047	0.291573	0.304874	0.209794	6	1.13866	0.192394
601	llmg_0559-llmg_0559-MG790	-0.0320132	-0.414334	0.229081	0.180983	0.204998	0.130317	6	1.0511	0.640462
602	llmg_0560-hemK-mg6253	-0.425514	-0.348447	0.0292362	-0.0885533	-0.0230789	-0.0751445	6	-1.16795	0.0961347
603	llmg_0561-llmg_0561-MG262	-0.0731247	0.134859	0.0156873	0.0957245	-0.00588958	0.167964	6	1.05746	0.197659
604	llmg_0562-llmg_0562-mg6257	-0.096432	0.0114402	0.229305	-0.0338516	-0.0150948	-0.0945265	6	1.00014	0.997835
605	llmg_0563-glyA-MG854	-0.0103101	-0.183748	-0.182792	0.20419	-0.619532	-0.195825	6	-1.179	0.197449
606	llmg_0564-llmg_0564-MG150047	NA	NA	1.76864	1.30299	NA	NA	2	4.6451	NA
607	llmg_0564-llmg_0564-MG853	0.319392	-0.0994235	-0.634584	0.0495879	0.206011	0.00844321	6	-1.02541	0.860964
608	llmg_0565-serC-MG852	-1.92187	NA	1.23353	1.14806	0.917529	0.596825	5	1.48411	0.539745
609	llmg_0566-serA-MG851	NA	-1.31287	0.106456	-0.304638	0.928702	-0.014878	5	-1.12687	0.757911
610	llmg_0567-serB-MG850	0.178309	NA	1.65715	NA	1.1017	1.31628	4	2.89609	0.0437087
611	llmg_0568-llmg_0568-mg6495	0.352611	0.901067	-0.168374	-0.382996	0.515557	-0.204152	6	1.18406	0.44511
612	llmg_0570-spoU-MG847	-0.41558	0.0511639	-0.395743	-0.440342	-0.26544	-0.512799	6	-1.39068	0.0106026
613	llmg_0571-llmg_0571-mg6498	NA	0.59256	-1.6274	-0.539404	NA	NA	3	-1.69003	0.498952
614	llmg_0572-llmg_0572-MG150048	0.116017	-0.0884052	-0.126707	0.907991	0.269442	-0.0296867	6	1.19098	0.319901
615	llmg_0572-llmg_0572-mg6500	-1.55036	-0.848747	1.06797	0.486355	-0.600143	0.0771355	6	-1.25604	0.583944
616	llmg_0573-llmg_0573-mg6501	-1.36382	-0.755415	0.0396621	-0.141593	-0.440765	NA	5	-1.70299	0.0982755
617	llmg_0574-fld-mg6502	-0.0423979	-0.406433	-0.0764421	-0.148615	-0.16922	-0.228576	6	-1.19556	0.0199357
618	llmg_0576-llmg_0576-MG1809	-0.301493	-0.415022	-0.369667	-0.295514	-0.308764	-0.281732	6	-1.38916	2.06087e-05
619	llmg_0577-pepM-mg5570	-0.703654	-0.417597	-0.145688	1.20759	-0.476774	-0.258287	6	-1.14157	0.655282
620	llmg_0578-llmg_0578-mg5576	0.316956	-0.0618962	-0.137253	-0.373318	-0.591714	-0.276697	6	-1.20601	0.198186
621	llmg_0579-llmg_0579-mg5574	-1.13059	NA	-0.469202	-0.379725	-0.579589	-0.28907	5	-1.76762	0.0184274
622	llmg_0581-llmg_0581-MG150049	NA	NA	NA	NA	NA	NA	0	#VALUE!	NA
623	llmg_0582-ptsK-mg5369	0.0600922	0.12161	-0.193885	-0.216276	-0.0866655	0.0709572	6	-1.04153	0.522854
624	llmg_0583-lgt-MG2353	NA	-0.952193	-0.0312916	-0.227328	0.144372	0.161736	5	-1.19834	0.427821
625	llmg_0584-llmg_0584-MG2354	-0.596546	-0.228871	-0.209005	-0.32882	-0.372266	-0.30275	6	-1.40454	0.00192032
626	llmg_0585-llmg_0585-MG2355	-2.21278	-2.08859	-0.349838	-0.501776	-0.588875	-0.62374	6	-2.88907	0.0282228
627	llmg_0586-gnd-MG2356	0.000651404	0.0827081	0.124421	0.144609	0.0218065	0.0219996	6	1.06826	0.0431206
628	llmg_0588-kupB-mg6191	0.533113	0.996492	0.14654	-0.10021	0.326737	0.286454	6	1.4403	0.0623457
629	llmg_0589	0.439976	0.141285	-0.0278634	-0.107477	-0.520288	-0.446945	6	-1.09077	0.580966
630	llmg_0590-llmg_0590-MG150170	-0.36371	-0.446526	0.189277	0.341154	-0.0105779	-0.133041	6	-1.07312	0.597914
631	llmg_0591-miaA-mg6389	-0.310576	-0.317961	-0.45909	-0.341464	0.0347461	-0.0347331	6	-1.26894	0.0295125
632	llmg_0592-llmg_0592-mg6390	-0.538783	-0.727128	-0.250817	-0.307449	0.0616743	-0.0721138	6	-1.35767	0.0500002
633	llmg_0593-llmg_0593-MG2163	0.416532	NA	NA	NA	NA	NA	1	1.51669	NA
634	llmg_0594-ps201-MG2162	-0.543701	-0.313728	0.0488026	0.211609	-0.0734673	0.0234992	6	-1.11386	0.380495
635	llmg_0595-ps202-MG2161	0.184026	1.1171	NA	-0.627877	0.123434	NA	4	1.22039	0.61619
636	llmg_0596-ps203-MG150012	0.480412	-3.22499	0.139337	-0.434087	0.119933	0.0579803	6	-1.61108	0.435234
637	llmg_0597-ps204-MG150013	-2.74618	NA	-0.111642	NA	-0.179299	1.77702	4	-1.37029	0.756776
638	llmg_0598-ps205-MG150050	1.05305	NA	NA	NA	NA	-0.409532	2	1.37955	NA
639	llmg_0599-llmg_0599-MG2157	0.208782	0.167995	-0.289197	-0.217735	0.0537272	0.0187067	6	-1.00967	0.911999
640	llmg_0600-llmg_0600-MG2156	1.35928	-0.0648987	-0.186528	0.288364	-0.115552	-2.01611	6	-1.1304	0.794276
641	llmg_0600-llmg_0600-mg6401	-0.0694938	-0.107474	0.0754219	-0.0894104	-0.0018342	0.0407861	6	-1.02566	0.443805
642	llmg_0601-llmg_0601-MG2155	-0.117288	-0.664888	-0.0451293	0.014861	-0.347469	-0.376334	6	-1.29181	0.0577927
643	llmg_0602-llmg_0602-mg6405	0.165958	-0.225684	0.0323074	-0.263075	-0.112356	-0.197835	6	-1.1053	0.203156
644	llmg_0603-llmg_0603-mg6406	-0.237135	-0.6072	-0.314936	-0.218176	-0.136704	-0.175927	6	-1.32535	0.00984836
645	llmg_0604-llmg_0604-mg8466	-2.8674	NA	-0.176825	0.651691	-0.0124618	NA	4	-1.8244	0.495083
646	llmg_0605-llmg_0605-mg8465	0.410416	0.254013	-0.0553001	0.133361	0.112034	0.485333	6	1.25021	0.0419413
647	llmg_0606-recJ-mg8460	0.00980268	-0.0632323	-0.223537	-0.209209	-0.0973538	0.240125	6	-1.0589	0.448301
648	llmg_0606-recJ-mg8461	-1.72327	0.500912	-0.074965	-0.287843	0.721304	-0.326037	6	-1.21935	0.596653
649	llmg_0607-apt-MG150201	0.143167	0.109989	0.389674	0.468523	0.341976	0.341421	6	1.34868	0.0035694
650	llmg_0608-rpoE-mg5215	-0.100997	0.112827	0.259702	0.203081	0.175533	0.136421	6	1.14008	0.0499019
651	llmg_0609-pabC-mg5216	0.0321841	0.201326	0.156129	0.208426	0.42373	0.33256	6	1.25323	0.00995715
652	llmg_0610-greA-MG178	0.218593	-0.00197655	0.0548093	0.305901	0.214663	0.171671	6	1.17423	0.0183037
653	llmg_0611-llmg_0611-MG179	NA	0.058617	1.40499	-0.810134	NA	NA	3	1.24337	0.767523
654	llmg_0612-llmg_0612-mg8520	-0.551486	-0.194376	-0.196137	-0.259891	-0.136316	-0.23475	6	-1.29973	0.00740006
655	llmg_0614-ctsR-MG572	-0.221097	-0.0750505	0.402285	0.28957	0.0848465	0.130401	6	1.10719	0.325754
656	llmg_0615-clpC-mg6055	0.962496	0.567932	0.159811	0.14742	0.21552	0.341871	6	1.49059	0.027431
657	llmg_0616-yfiA-MG574	0.155147	-0.296339	0.0332247	0.112709	-0.251434	-0.22764	6	-1.08226	0.38092
658	llmg_0617-enoA-MG1337	-0.0584543	0.0874628	0.107559	0.0668519	0.109569	-0.0947873	6	1.03704	0.365876
659	llmg_0618-xerD-MG1339	0.264137	1.01435	-0.346148	-0.809205	0.318258	-0.487722	6	-1.00775	0.978414
660	llmg_0619-llmg_0619-MG1341	-0.49169	-0.164812	-0.541082	-0.549133	-0.340198	-0.22692	6	-1.47055	0.00235114
661	llmg_0623-abiP-MG34	0.0430718	-0.980765	-0.791389	-0.208363	-0.171001	0.127774	6	-1.39112	0.134198
662	llmg_0624-llmg_0624-MG32	NA	-2.80683	NA	NA	-1.07367	-0.108629	3	-3.77995	0.234114
663	llmg_0625-llmg_0625-MG31	NA	1.18858	-0.865678	-1.18122	0.295673	0.35444	5	-1.04252	0.928127
664	llmg_0626-llmg_0626-mg6361	-2.01134	-1.76091	-0.0567366	0.499335	0.0532441	-0.147216	6	-1.76934	0.239032
665	llmg_0627-fadD-MG2358	0.0657774	0.248059	0.87374	0.0952248	-0.291496	-0.367508	6	1.10956	0.592518
666	llmg_0628-llmg_0628-mg12585s	-2.36817	-0.0396776	-0.260676	-0.397059	-0.490121	-1.10993	6	-2.17626	0.0770939
667	llmg_0629-pfl-MG2361	-0.416564	-0.167323	-0.16313	0.0457926	-0.214377	-0.0497245	6	-1.17455	0.0538901
668	llmg_0630-coaE-MG2362	-0.160938	0.438139	0.0541481	0.157763	0.286688	0.0605831	6	1.14958	0.16052
669	llmg_0631-pmrA-MG2363	-1.80321	-0.140353	-0.145486	-0.277749	-0.110026	-0.159451	6	-1.55174	0.169439
670	llmg_0633-ftsW1-MG2365	-0.0114466	-0.0178623	-0.0493718	-0.0666425	-0.0842764	-0.0494729	6	-1.04761	0.00953939
671	llmg_0634-pycA-MG2366	-3.07924	-0.165256	0.14884	0.0545611	-0.146255	-0.0707681	6	-1.7212	0.335358
673	llmg_0635-gltA-mg12597s	NA	NA	0.863875	0.928843	0.397332	0.584554	4	2.00101	0.0112406
672	llmg_0635-gltA-MG2367	1.12783	-1.46614	-0.522791	0.199405	0.336317	0.502307	6	1.02993	0.939479
675	llmg_0636-citB-mg12599s	NA	NA	0.11436	0.642901	0.248121	1.25073	4	1.75774	0.113824
674	llmg_0636-citB-MG2368	0.942728	-1.97869	0.688621	0.952266	0.393815	-0.298605	6	1.12377	0.809843
676	llmg_0637-icd-MG2371	-0.198083	NA	0.715422	0.531206	-0.0212914	-0.0165764	5	1.22401	0.318213
677	llmg_0637-icd-mg6373	NA	NA	-0.266638	0.158808	NA	NA	2	-1.05539	NA
678	llmg_0638-clpP-MG2372	0.255844	-0.102704	0.348263	0.38471	-0.1538	-0.176634	6	1.09704	0.429565
679	llmg_0639-llmg_0639-MG2373	-1.47372	-0.472153	-0.207022	-0.241882	-0.654101	-0.534673	6	-1.81713	0.0250065
680	llmg_0640-trmA-mg6378	-0.329325	-0.35911	-0.0617284	-0.106323	0.206675	0.271254	6	-1.06513	0.581838
681	llmg_0641	-0.00602373	-0.224585	0.642317	0.547278	0.347068	0.359865	6	1.32003	0.0955624
682	llmg_0642-llmg_0642-MG2376	NA	0.131095	-0.110513	-0.733198	0.067045	-0.228867	5	-1.19111	0.318018
683	llmg_0642-llmg_0642-mg6381	-0.010829	-0.8924	-0.373721	0.26646	-0.155915	-0.0548085	6	-1.22573	0.264104
685	llmg_0643-pacL-mg12604s	-1.13349	-0.499538	-0.00193356	0.313875	0.512511	0.288405	6	-1.09056	0.746624
684	llmg_0643-pacL-MG2285	NA	NA	NA	NA	0.0976212	NA	1	1.10255	NA
686	llmg_0644-llmg_0644-MG2284	0.70675	NA	NA	-1.40219	NA	-0.994805	3	-1.75666	0.475014
687	llmg_0645-llmg_0645-MG2283	-0.183141	1.0067	NA	NA	-0.343231	NA	3	1.17364	0.743048
688	llmg_0646-icaA-MG2281	-0.0352622	0.324983	-1.35691	0.407462	0.117561	-0.587444	6	-1.20716	0.523288
689	llmg_0646-icaA-MG2282	NA	NA	NA	NA	0.454684	NA	1	1.57567	NA
690	llmg_0649-icaB-MG1016	NA	NA	-1.39256	NA	NA	NA	1	-4.02512	NA
691	llmg_0650-brnQ-MG1017	0.674833	0.269391	0.848175	0.55993	0.639188	0.74604	6	1.86438	0.000599715
692	llmg_0650-brnQ-MG1279	-0.318443	0.302242	0.756601	0.487077	0.774271	0.586236	6	1.5393	0.0485884
693	llmg_0651-llmg_0651-MG150053	4.28925	2.76776	NA	-1.27259	NA	-1.72239	4	2.76076	0.543562
694	llmg_0651-llmg_0651-MG150053B	NA	NA	NA	-1.23349	NA	-0.629233	2	-2.53796	NA
695	llmg_0651-llmg_0651-MG150054	2.20083	1.24081	0.970271	NA	NA	NA	3	4.35199	0.0588223
696	llmg_0655-llmg_0655-MG150268	1.23351	NA	NA	NA	NA	-0.866127	2	1.20164	NA
697	llmg_0655-llmg_0655-MG150268B	NA	NA	0.509751	0.095255	-0.160584	-0.294401	4	1.03822	0.845729
698	llmg_0658-hsdR-MG1402	-0.156841	0.387047	0.660375	0.446565	0.552797	0.516115	6	1.49333	0.0192258
699	llmg_0658-hsdR-MG1403	0.617644	NA	NA	NA	0.0698538	0.0453973	3	1.27673	0.321066
700	llmg_0659-hsdM-MG1401	0.39978	0.341149	0.393525	0.334064	0.0453818	0.195167	6	1.32956	0.0039824
701	llmg_0660-hsdS-MG1399	0.26305	-1.67868	-0.0910669	0.174108	-0.278917	0.0485431	6	-1.29757	0.41665
702	llmg_0661-llmg_0661-MG1398	-1.49332	-0.169807	-0.923234	-0.320551	-0.75804	-1.20611	6	-2.25206	0.0112161
703	llmg_0663-pcp-MG2576	1.82378	NA	NA	-1.22882	NA	0.75126	3	1.56634	0.665545
704	llmg_0664-amd-MG2577	0.924002	NA	-1.18	NA	-0.44386	NA	3	-1.26274	0.741493
705	llmg_0666-oxlT-MG2580	NA	0.315543	NA	NA	NA	NA	1	1.371	NA
706	llmg_0666-oxlT-mg8177	-0.858109	1.299	-0.0248567	0.30227	0.213392	-0.534728	6	1.0684	0.837701
707	llmg_0668	-0.0269533	NA	NA	-3.42032	NA	NA	2	-5.60489	NA
708	llmg_0669-llmg_0669-MG150056	-0.059877	NA	-6.04966	NA	NA	NA	2	-21.2163	NA
709	llmg_0671-llmg_0671-MG150057	0.308915	NA	1.08153	0.890343	-0.0333275	0.392993	5	1.69569	0.0594425
710	llmg_0673-llmg_0673-MG1960	0.862618	-1.70541	0.22993	-0.379607	0.215114	0.771154	6	-1.00103	0.997973
711	llmg_0674-tnp1297-MG1961	0.486091	0.327802	0.300073	0.30166	0.39545	0.431359	6	1.45316	7.11701e-05
712	llmg_0675-llmg_0675-MG150202	0.382818	0.382036	0.640335	0.55233	0.595337	0.609918	6	1.69406	0.000100421
713	llmg_0676-llmg_0676-MG1962	0.208558	0.102683	0.406328	0.60126	0.667576	0.674998	6	1.55826	0.00685883
714	llmg_0679	NA	1.84872	-2.03792	-1.09028	NA	0.656387	4	-1.16856	0.869382
715	llmg_0685	NA	NA	NA	NA	1.71498	1.55219	2	5.12222	NA
716	llmg_0686-llmg_0686-MG150270	0.636382	0.0212458	0.0444949	0.518197	0.17171	0.380991	6	1.3438	0.036591
717	llmg_0687-llmg_0687-MG150061	0.886391	1.41196	-0.000956814	-0.721572	NA	-0.175626	5	1.32318	0.505537
718	llmg_0688-llmg_0688-mg6100	0.0444851	0.421462	0.359163	0.140905	0.225113	0.267956	6	1.2753	0.00774292
719	llmg_0690-llmg_0690-mg6323	1.1615	0.269925	-0.611591	-0.124076	-0.741647	0.865671	6	1.1464	0.683635
720	llmg_0690-llmg_0690-mg6325	0.0320935	0.501848	0.239309	0.966237	-2.76177	1.17062	6	1.02503	0.967882
721	llmg_0691	NA	-1.20649	-0.739648	0.288898	NA	0.397139	4	-1.37029	0.480706
722	llmg_0692-llmg_0692-MG150271	-0.89876	0.664255	-0.0168742	-0.459647	-0.303657	-0.00877319	6	-1.18599	0.462232
723	llmg_0693-llmg_0693-MG770	0.106619	NA	-0.0785297	0.580269	1.05783	2.64074	5	2.36643	0.151443
724	llmg_0694-flpB-MG771	-0.0555231	NA	-0.0881907	-0.546746	0.442868	0.368244	5	1.02442	0.899104
725	llmg_0695-llmg_0695-MG150062	NA	-1.26513	NA	0.17763	-0.207082	0.203172	4	-1.31371	0.485398
726	llmg_0696-llmg_0696-MG150063	NA	1.45442	NA	3.33993	NA	NA	2	10.9921	NA
727	llmg_0697-oppD-MG775	0.976832	0.432952	1.69696	2.09752	1.58969	1.69741	6	4.11742	0.00221706
728	llmg_0698-oppF-MG776	1.02489	0.952888	1.86618	1.81723	1.73537	1.67664	6	4.5367	0.000281533
729	llmg_0699-oppB-MG777	0.97049	1.01247	1.69206	1.90871	1.73853	1.75978	6	4.54338	0.000280046
730	llmg_0700-oppC-MG778	1.07981	1.08454	1.74194	2.55836	1.56766	1.52214	6	4.91558	0.000823158
731	llmg_0701-oppA-MG779	0.886548	1.01831	1.71554	1.17252	1.6397	1.65154	6	3.84725	0.000275115
732	llmg_0702-pepO-MG780	0.946132	1.23671	1.37219	1.05074	1.68771	1.5071	6	3.66965	9.06859e-05
733	llmg_0703-llmg_0703-mg6307	0.580354	NA	0.720642	0.115766	-0.980939	-0.0450317	5	1.08129	0.807489
734	llmg_0704-llmg_0704-MG150272	0.150845	0.314588	0.182385	-0.0500604	-0.330926	-0.340409	6	-1.01234	0.917686
735	llmg_0705-llmg_0705-mg6305	-0.590734	0.377667	0.475806	-0.296759	-0.780752	NA	5	-1.17698	0.554987
736	llmg_0706-llmg_0706-MG150064	NA	0.327654	NA	9.25632	NA	NA	2	120.54	NA
737	llmg_0707-llmg_0707-MG150273	-0.0328794	0.408641	0.0335258	0.302741	-1.02917	-0.19393	6	-1.08891	0.700859
738	llmg_0708-llmg_0708-MG150274	1.29779	0.464794	0.0777757	-0.770584	-0.403656	1.21663	6	1.3686	0.403656
739	llmg_0709-llmg_0709-mg5457	-1.03138	0.84448	-0.137078	-0.700382	0.46828	0.4945	6	-1.01032	0.974268
740	llmg_0710-llmg_0710-MG1594	0.157795	-0.894056	0.0109828	0.107516	0.138591	0.125507	6	-1.06072	0.740477
741	llmg_0711-tnpR-MG2723	NA	0.0653816	NA	-0.781429	0.0612706	-0.306521	4	-1.27166	0.316385
742	llmg_0712-llmg_0712-MG2724	-1.35221	NA	2.24828	1.51841	-3.38963	-1.05613	5	-1.50119	0.711799
743	llmg_0713-llmg_0713-MG150065	-0.312678	-0.153259	-0.209128	-0.220128	-0.0826954	-0.270462	6	-1.23129	0.00158505
744	llmg_0715-llmg_0715-MG2728	-0.991417	0.776017	-0.450075	0.519102	-0.128195	-0.297521	6	-1.10004	0.733739
745	llmg_0716-llmg_0716-MG150275	NA	2.49704	NA	NA	-0.244758	NA	2	3.08374	NA
746	llmg_0716-llmg_0716-MG150275B	-0.505711	0.0611188	-0.0292477	0.0728788	-0.227472	-0.0730667	6	-1.12403	0.248646
747	llmg_0717	4.36862	NA	NA	-0.989793	NA	NA	2	5.41631	NA
748	llmg_0718-llmg_0718-MG2620	NA	NA	-1.06382	-0.637423	NA	0.296876	3	-1.59699	0.364173
749	llmg_0719-llmg_0719-mg5836	0.397449	0.140288	-0.279051	0.313553	0.455382	0.104788	6	1.20772	0.144824
750	llmg_0722-serS-MG1010	0.282709	0.37526	0.00302292	0.204866	-0.0217525	0.221981	6	1.19444	0.0391626
751	llmg_0724-llmg_0724-mg10050s	-0.196379	-0.266361	0.100746	0.151668	-0.226507	-0.257406	6	-1.12267	0.195359
752	llmg_0725-llmg_0725-MG1006	-0.171821	-0.0357243	-0.099791	-0.241396	-0.83084	-0.971709	6	-1.47976	0.0630252
753	llmg_0726-llmg_0726-mg6567	-0.693227	-0.402592	-0.268063	-0.272619	-0.3911	-0.330972	6	-1.48156	0.00170187
754	llmg_0727-ptnD-mg6568	-0.161226	-0.091523	-0.323279	-0.262568	-0.454271	-0.51899	6	-1.35253	0.00652783
755	llmg_0728-ptnC-MG1001	-0.327632	0.203819	-0.236834	-0.200946	-0.525429	-0.48643	6	-1.29984	0.0583704
756	llmg_0729-ptnAB-MG1000	-0.359479	-0.192119	-0.477104	-0.401219	-0.374561	-0.392223	6	-1.44212	0.000219273
757	llmg_0730-fer-MG150276	NA	NA	0.143262	-0.0326365	-0.338335	-0.172355	4	-1.10519	0.400616
758	llmg_0731-llmg_0731-mg6573	-0.547538	-0.575342	-0.147156	-0.0913015	-0.0156	-0.0880505	6	-1.27655	0.0617984
759	llmg_0732-cmk-MG324	-0.140755	-0.388668	-0.0993381	-0.070954	0.148353	0.267814	6	-1.04839	0.637137
760	llmg_0733-llmg_0733-MG325	-1.15182	-0.184152	-0.539006	-0.728517	-0.344429	0.116544	6	-1.60303	0.0474601
761	llmg_0733-llmg_0733-MG326	-0.112696	-0.142197	-0.236729	-0.2203	-0.0183517	-0.216526	6	-1.17093	0.00584195
762	llmg_0734-llmg_0734-MG327	NA	-0.83716	0.0246315	-0.298466	-0.195299	-0.095717	5	-1.32366	0.133212
763	llmg_0736-llmg_0736-mg5824	NA	NA	NA	1.4304	-0.0477692	NA	2	1.99634	NA
764	llmg_0737-malG-MG731	0.478043	0.0505548	-0.0542459	0.228681	0.231394	0.0724877	6	1.18272	0.0800799
765	llmg_0738-malF-MG730	NA	-3.52859	0.0771191	0.175631	0.0300933	NA	4	-2.25114	0.436551
766	llmg_0739-malE-MG729	0.890025	0.818047	0.0231252	-0.145267	-0.181456	-0.245048	6	1.21317	0.404418
767	llmg_0740-dexC-MG1073	-0.602198	-1.07845	-0.522801	0.0200419	-0.655581	-0.436087	6	-1.72607	0.0131351
768	llmg_0741-dexA-MG1075	0.0041629	1.99407	1.79601	NA	3.5665	0.397735	5	4.71947	0.0706628
769	llmg_0742-maa-MG1076	NA	0.31571	1.81101	0.891441	-0.412173	-3.41805	5	-1.17635	0.864301
770	llmg_0743-amyY-MG1077	-0.0211043	NA	NA	-0.294956	NA	0.477672	3	1.05535	0.833913
771	llmg_0744-agl-MG1078	NA	NA	-0.43813	NA	0.128651	NA	2	-1.16735	NA
772	llmg_0745-mapA-MG1079	2.05424	1.03503	0.0527151	0.644216	0.284075	0.670104	6	2.20354	0.0407721
773	llmg_0745-mapA-MG1080	NA	NA	0.0617028	-0.623179	-0.55889	0.704894	4	-1.10945	0.76014
774	llmg_0746-malR-MG1081	-0.274991	-0.0343936	-0.0925653	-0.150046	-0.0792466	-0.0690568	6	-1.1238	0.0211324
775	llmg_0747-llrF-MG1082	-0.587241	0.365526	0.0637097	0.482364	0.240582	0.327857	6	1.16044	0.389199
776	llmg_0748-kinF-MG1083	0.336473	0.00433495	0.0934748	0.108129	0.340381	0.159319	6	1.18968	0.0267191
777	llmg_0749-dxsB-MG1085	-0.532388	-0.162432	0.0163887	0.0469825	0.0108418	0.168497	6	-1.07826	0.489679
778	llmg_0749-dxsB-MG1086	-0.37124	0.180734	-0.174427	-0.0823067	-0.200862	-0.1818	6	-1.14834	0.122314
779	llmg_0750	-0.182657	-0.850616	-0.0233461	0.307777	0.624805	-0.411621	6	-1.09338	0.69284
781	llmg_0751-ascB-mg10311s	-0.0254407	-0.774403	0.13592	0.0414809	-0.270912	-0.270023	6	-1.21397	0.208473
780	llmg_0751-ascB-MG1088	-0.111096	-0.182249	0.0945538	0.309136	-0.219249	-0.196585	6	-1.05223	0.579041
782	llmg_0752-pip-MG1089	0.252384	-0.515144	0.0901996	0.728703	0.310418	0.67347	6	1.29262	0.22322
783	llmg_0753-ubiE-MG1090	-0.613947	-0.498456	-0.407873	-0.358023	0.0387777	-0.065277	6	-1.37364	0.0278112
784	llmg_0754-llmg_0754-MG1091	NA	NA	NA	NA	-2.83289	0.280574	2	-3.58285	NA
785	llmg_0755-llmg_0755-mg7461	0.342519	-0.013579	-0.00929149	0.1422	-0.75512	-0.0668251	6	-1.06185	0.708795
786	llmg_0756-llmg_0756-mg7462	-0.240199	-0.0556468	0.0756501	-0.300538	0.0703989	-0.112672	6	-1.09838	0.200613
787	llmg_0757	NA	-3.72522	-1.02141	1.51794	NA	0.415691	4	-2.02031	0.578935
788	llmg_0758-eriC-mg7464	0.196215	0.170446	-0.154606	-0.176999	0.00544639	-0.00093097	6	1.00662	0.921825
789	llmg_0759-ubiA-mg7466	0.326605	0.361466	-0.0417184	-0.000209518	0.288201	0.209268	6	1.20998	0.0420671
790	llmg_0760-llmg_0760-mg7467	0.374278	0.295984	0.370939	0.491193	0.666448	0.599979	6	1.59436	0.000528955
791	llmg_0761-llmg_0761-MG1591	0.190938	-0.592598	-0.030585	-0.0210405	-0.181421	0.0893791	6	-1.09515	0.456221
792	llmg_0762-udk-MG1589	-0.223451	-0.337473	-0.312744	-0.380632	-0.357615	-0.322521	6	-1.38045	2.77432e-05
793	llmg_0763-pta-MG999	-1.96299	-3.50482	-0.751255	-0.826775	-0.349519	-0.2791	6	-3.59332	0.0535987
794	llmg_0764-llmg_0764-mg7474	0.435875	-0.0344834	-0.0752554	-0.0675328	-0.0580875	0.0680519	6	1.04578	0.604819
795	llmg_0765-llmg_0765-MG994	-0.396165	-0.213608	-0.308084	-0.297222	-0.0301539	0.019757	6	-1.2266	0.0292732
796	llmg_0766-ftsK-mg7479	0.227953	0.206465	0.114204	0.240778	0.40987	0.324263	6	1.28907	0.00170727
797	llmg_0767-llmg_0767-MG501	-0.142053	0.220872	0.0699203	0.0791092	0.310764	0.418314	6	1.17291	0.107569
798	llmg_0768-holA-MG150277	0.44697	0.509213	0.29936	0.219129	0.166429	0.0167058	6	1.31824	0.0138939
799	llmg_0768-holA-MG498	-0.307951	0.278023	-0.228199	-0.295677	0.548463	-0.852372	6	-1.15367	0.509472
800	llmg_0769-llmg_0769-mg8722	-0.340998	-0.0430806	-0.135727	-0.200745	0.110437	-0.0576883	6	-1.11773	0.136198
801	llmg_0771-llmg_0771-mg10335s	-0.201728	-0.116053	-0.00397764	0.106246	0.0838775	0.0938751	6	-1.00631	0.908358
802	llmg_0771-llmg_0771-mg8723	-0.0767731	0.0955061	0.038509	-0.207976	-0.0746266	-0.074743	6	-1.05129	0.298895
803	llmg_0772-llmg_0772-MG1276	NA	-0.786584	NA	NA	NA	-0.266149	2	-1.69277	NA
804	llmg_0772-llmg_0772-mg5580	0.119692	-0.248258	-0.0431252	0.0311588	-0.181509	-0.0520294	6	-1.06433	0.309273
805	llmg_0774-pepQ-mg5578	0.251619	0.416568	-0.0079124	0.0562177	0.210853	0.108214	6	1.18838	0.0399396
806	llmg_0775-ccpA-MG150143	-0.040828	0.114535	-0.0788928	-0.284692	-0.359289	-0.373642	6	-1.18586	0.0889768
807	llmg_0776-trxB2-MG150144	-0.573502	-0.00950662	-0.489628	-0.466229	-0.649522	-1.04917	6	-1.71531	0.0109251
808	llmg_0777-llmg_0777-mg5948	-0.106671	-0.455885	-0.371398	NA	-0.407726	0.00273113	5	-1.30707	0.041981
809	llmg_0778-mutS-MG150203	0.0937302	0.125986	0.251136	0.292688	0.297168	0.309565	6	1.25656	0.00195484
810	llmg_0778-mutS-mg5949	0.0633319	-0.0690799	0.136962	-0.00712835	0.367857	0.411991	6	1.1626	0.121709
811	llmg_0778-mutS-mg5950	-0.374866	0.509012	NA	-0.219561	0.619466	0.0685145	5	1.12808	0.570776
812	llmg_0779-trxA-mg5951	0.0549469	-0.263631	0.0221886	0.0114685	-0.354406	-0.291974	6	-1.14671	0.130003
813	llmg_0781-llmg_0781-MG150278	-0.771132	-0.762997	-0.139076	0.329809	-0.745433	-0.3128	6	-1.49223	0.079541
814	llmg_0782-aroD-mg6887	-0.347507	0.379602	-0.158621	0.443631	0.199768	0.548153	6	1.19423	0.277894
815	llmg_0783-purB-MG2452	-0.102373	-0.081731	-0.0171401	0.165627	-0.135699	-0.0881373	6	-1.04419	0.377438
816	llmg_0784-rbsR-MG2451	NA	NA	-4.02896	NA	NA	NA	1	-56.2027	NA
817	llmg_0785-rbsK-MG2450	-0.476381	NA	0.80193	0.161707	1.36439	0.147259	5	1.4915	0.272778
818	llmg_0786-rbsD-mg6892	-0.335701	0.541997	-1.57349	NA	NA	NA	3	-1.57733	0.535059
819	llmg_0787-rbsD-MG2448	NA	-2.00292	-0.213033	6.40383	-0.347194	-0.113133	5	2.10752	0.635691
820	llmg_0788-rbsC-MG2447	-4.3504	-0.0217025	-0.0994532	1.34799	-0.388369	-0.432704	6	-1.92984	0.440625
821	llmg_0789-rbsB-MG2446	0.705848	NA	NA	NA	NA	NA	1	2.02556	NA
822	llmg_0790-ps301-MG2445	-0.516501	1.39479	0.535379	NA	-1.25999	-0.0132096	5	1.02849	0.953402
823	llmg_0791-ps302-MG838	-0.330764	-0.300479	-0.145862	-0.296239	-0.263394	-0.237936	6	-1.30011	0.000186945
824	llmg_0792-ps303-MG839	-0.485085	-0.0285472	-0.149731	-0.0534438	-0.0779315	-0.0412148	6	-1.1495	0.108273
825	llmg_0793-ps304-MG840	0.0994901	NA	NA	0.955111	-0.0717593	0.0949552	4	1.30924	0.329483
826	llmg_0794-ps305-MG841	-0.0671163	NA	-0.0583845	1.53398	0.671612	NA	4	1.68207	0.264369
827	llmg_0795-ps306-MG150066	-0.0300707	2.72283	-0.202433	-0.592493	-0.220368	-1.1469	6	1.09245	0.878885
828	llmg_0796-ps307-MG150279	NA	-2.09642	0.405284	0.0298705	-0.480025	-0.54294	5	-1.7106	0.276937
829	llmg_0797-ps308-MG844	0.240213	0.104817	0.241582	0.269208	-0.0407307	-0.165197	6	1.1144	0.195868
830	llmg_0798	0.174872	-3.71998	-1.08004	-0.342002	-2.5616	-0.192027	6	-3.62116	0.0955951
831	llmg_0800-ps310-MG150280	0.602181	NA	-0.977393	NA	0.284609	-0.571672	4	-1.18006	0.682486
832	llmg_0800-ps310-MG150280B	0.833055	0.324261	0.0699008	-0.119395	-0.0709772	-0.371799	6	1.11722	0.547762
833	llmg_0801-ps311-MG150281	0.213342	-0.077399	-0.272499	-0.272051	-0.328257	-0.443536	6	-1.21742	0.0937131
834	llmg_0802-ps312-MG150282	-0.201107	NA	NA	-0.839257	-0.520852	-0.689352	4	-1.7553	0.0261039
835	llmg_0803-ps313-MG150067	NA	NA	-0.815812	NA	-1.20417	0.626258	3	-1.59133	0.491874
836	llmg_0804-ps314-MG2815	0.440504	NA	NA	NA	-0.0205609	NA	2	1.23364	NA
837	llmg_0805-ps315-MG2816	NA	NA	-0.310079	NA	NA	-0.382074	2	-1.41351	NA
838	llmg_0805-ps315-mg6914	1.54117	NA	-0.326945	0.0401327	NA	-1.2779	4	-1.0059	0.992614
839	llmg_0806-ps316-MG2817	NA	NA	NA	NA	NA	0.483061	1	1.62103	NA
840	llmg_0807-ps317-MG2819	NA	NA	NA	NA	NA	NA	0	#VALUE!	NA
841	llmg_0807-ps317-mg6917	-0.229887	NA	NA	NA	NA	NA	1	-1.25846	NA
842	llmg_0808-ps318-MG2821	0.00144763	1.56912	0.0186084	0.21845	-1.61021	-0.276378	6	-1.01325	0.975956
843	llmg_0810-ps319-MG150068	NA	NA	NA	NA	0.469243	-0.384792	2	1.04313	NA
844	llmg_0811-ps320-MG2823	-0.492005	0.78184	0.31027	NA	3.27171	NA	4	2.63255	0.318781
845	llmg_0811-ps320-mg6921	NA	-0.0336577	0.0126942	-0.787414	-0.649112	-0.81384	5	-1.57502	0.0685045
846	llmg_0812-ps321-MG150017	0.0531058	-0.582535	0.111022	0.424479	-1.44138	0.334476	6	-1.20138	0.554689
847	llmg_0813-ps322-mg6923	NA	-0.877967	-0.776155	0.0167195	NA	NA	3	-1.72599	0.193365
848	llmg_0814-ps323-MG150283	1.10763	0.145006	-0.346858	1.0313	-0.0315683	-0.41306	6	1.28241	0.403643
849	llmg_0815-ps324-MG2828	NA	NA	NA	NA	NA	NA	0	#VALUE!	NA
850	llmg_0817-ps326-mg6927	2.08706	0.682361	0.267086	0.0942438	-1.00709	-0.193628	6	1.37943	0.47991
851	llmg_0818-ps327-mg6928	0.511483	0.538103	0.0871917	0.301049	-0.0194915	-0.178868	6	1.22946	0.143429
852	llmg_0819	NA	1.00401	NA	NA	0.494963	4.71044	3	7.92329	0.259544
853	llmg_0820	0.535079	NA	1.0507	0.267002	-1.30714	-0.872125	5	-1.06748	0.889731
854	llmg_0821-ps330-MG2196	NA	0.469146	NA	NA	1.72776	0.10325	3	2.15269	0.259467
855	llmg_0824-ps333-MG150204	-1.04527	-0.890285	0.274994	0.256507	-0.668699	0.0178994	6	-1.40843	0.217659
856	llmg_0824-ps333-MG150204B	0.463073	0.199055	0.859245	0.676888	-0.580036	-0.153994	6	1.27639	0.318002
857	llmg_0825-ps334-MG1530	1.22606	0.751731	0.35083	0.340353	-0.0447463	-0.0224756	6	1.54284	0.0806055
858	llmg_0826-ps335-MG1532	-0.601258	NA	-0.0163007	-0.189409	NA	0.0324775	4	-1.21364	0.271315
859	llmg_0826-ps335-MG1533	-0.000699649	-0.19892	0.389649	0.407969	0.289739	0.343183	6	1.22771	0.0983729
860	llmg_0830-ps336-MG150285	NA	-1.12089	0.253603	0.469185	NA	0.0818401	4	-1.08228	0.838588
861	llmg_0831-ps337-MG1538	NA	0.0923479	-1.57615	NA	-1.42189	NA	3	-2.63415	0.210446
862	llmg_0832-ps338-MG1539	-2.99381	-1.24271	-0.102481	0.29165	-1.84837	-1.23651	6	-3.28282	0.0580345
863	llmg_0833-ps339-MG150070	-0.90677	NA	-1.10235	NA	-0.216171	NA	3	-2.09964	0.110055
864	llmg_0834-ps340-MG150286	-0.249413	-0.210885	-0.037807	-0.114383	0.10757	0.209712	6	-1.05043	0.533085
865	llmg_0835-ps341-MG150071	NA	NA	NA	-0.563406	-0.360271	-0.708629	3	-1.72306	0.032788
866	llmg_0835-ps341-MG1542	0.895191	-1.07625	-0.383844	-0.726517	-0.0977457	-0.493862	6	-1.36867	0.308178
867	llmg_0836-ps342-MG1543	0.470742	0.580551	0.0121227	0.332061	-0.745813	-0.617752	6	1.00533	0.982554
868	llmg_0837-ps343-MG150287	NA	-2.24137	-1.61976	0.896949	-0.597492	NA	4	-2.43615	0.28474
869	llmg_0839-ps345-MG1545	0.365499	NA	0.585544	-0.0988138	-2.84226	-0.453349	5	-1.63016	0.471649
870	llmg_0840-ps346-mg6225	0.46613	0.0920223	0.59732	0.567885	-0.761569	-0.736976	6	1.03818	0.890821
871	llmg_0841-ps347-MG1547	0.252396	0.556326	0.689037	0.960051	-0.929681	-1.10022	6	1.07392	0.849344
872	llmg_0842-ps348-MG1548	NA	0.772617	NA	-0.603758	-1.29217	0.0115407	4	-1.32041	0.572372
873	llmg_0843-ps349-mg6228	0.0141917	0.702667	2.06644	0.218668	-0.717165	-0.436057	6	1.36087	0.482191
874	llmg_0844-ps350-mg6229	0.121459	-0.198407	0.126992	0.403625	-0.897664	-0.794027	6	-1.22917	0.385544
875	llmg_0845-ps351-mg7836	-0.532798	0.0889841	0.0261315	0.175668	-1.13434	-0.793514	6	-1.43569	0.161483
876	llmg_0846-ps352-mg7837	1.14995	0.33705	NA	NA	-1.17347	NA	3	1.11017	0.892074
877	llmg_0846-ps352-mg7838	0.20094	0.00680222	-0.240045	-0.213429	-0.6487	-0.690142	6	-1.30225	0.126152
878	llmg_0848-ps353-MG150073	2.99133	NA	-1.2911	NA	NA	NA	2	2.33992	NA
879	llmg_0848-ps353-MG1602	-1.67224	-0.363418	0.655186	0.329713	-0.646143	-0.628182	6	-1.47331	0.300321
880	llmg_0849-ps354-mg7841	0.216646	0.393403	0.0896814	0.233385	-0.0663556	-0.116743	6	1.13315	0.175618
881	llmg_0850-ps355-MG150288	0.832942	NA	-0.0630557	-0.316877	-0.107125	0.0764633	5	1.08814	0.69084
882	llmg_0851	NA	NA	NA	NA	0.525321	NA	1	1.691	NA
883	llmg_0851-ps356-mg8451	0.24105	0.187281	NA	-0.393558	-0.940915	-3.49666	5	-2.41225	0.270123
884	llmg_0851-ps356-mg8452	NA	NA	NA	-2.46757	NA	-0.639479	2	-4.72811	NA
885	llmg_0852-ps357-mg8521	-0.589574	0.183844	0.455841	0.704996	0.712485	0.712094	6	1.43804	0.142513
886	llmg_0853	-0.635073	-0.095061	-0.220455	-0.337915	-0.973661	NA	5	-1.57213	0.0458204
887	llmg_0854-llmg_0854-MG485	1.27947	NA	NA	0.636915	0.94264	-0.358711	4	1.86839	0.174915
888	llmg_0855-llmg_0855-MG150289	-0.563994	NA	-0.823483	-0.454622	-0.254286	-0.559572	5	-1.70096	0.00449537
889	llmg_0856-llmg_0856-MG482	-0.580696	-0.444095	-0.261221	-0.285455	-0.728895	-0.604811	6	-1.62287	0.00143285
890	llmg_0856-llmg_0856-MG483	-0.34286	-0.386315	-0.132493	-0.304165	-0.935115	-0.347631	6	-1.50395	0.0145885
891	llmg_0857-kdgR-MG481	-0.10553	-2.76342	0.0411113	-0.175473	-0.27856	-0.331449	6	-1.82617	0.22535
892	llmg_0858-uxuB-MG679	NA	NA	0.760324	NA	NA	NA	1	2.13897	NA
893	llmg_0859-uxuA-MG678	0.359302	NA	NA	1.12521	NA	NA	2	2.10067	NA
894	llmg_0860-uxuT-MG677	NA	-0.102051	NA	NA	NA	NA	1	-1.10744	NA
895	llmg_0861-llmg_0861-mg7166	NA	1.67509	NA	NA	NA	NA	1	5.33925	NA
896	llmg_0862-uxaC-MG825	NA	NA	NA	NA	NA	NA	0	#VALUE!	NA
897	llmg_0864-kdgA-MG828	-0.884046	NA	NA	0.721454	0.88055	NA	3	1.27038	0.712407
899	llmg_0865-llmg_0865-mg11333s	-0.22299	-1.50907	-0.146643	-0.101421	-0.316128	-0.000860197	6	-1.46646	0.156062
898	llmg_0865-llmg_0865-MG830	NA	1.47092	NA	NA	NA	NA	1	4.35324	NA
900	llmg_0866-llmg_0866-MG150290	-1.31203	-1.77001	-0.41863	-0.468263	NA	-1.26162	5	-2.84655	0.0161476
901	llmg_0867-llmg_0867-MG832	2.16726	NA	NA	NA	-2.42774	NA	2	-1.1391	NA
902	llmg_0868-tkt-MG2268	-0.122617	0.118197	1.11698	0.0464116	-0.622035	-0.225182	6	1.05333	0.835855
903	llmg_0868-tkt-MG2269	-0.163001	0.0655644	-0.0680807	-0.069293	-0.282688	-0.233676	6	-1.13337	0.0606611
904	llmg_0869-llmg_0869-MG150291	-0.46161	-0.642664	-0.435951	-0.467921	-0.679858	-0.441005	6	-1.68456	8.15109e-05
905	llmg_0870-llmg_0870-mg7155	-0.522742	-0.512125	-0.367188	-0.289092	-0.218694	-0.346552	6	-1.45654	0.000623477
906	llmg_0871-asd-MG676	0.812768	0.69078	0.656648	0.544681	0.644562	0.758963	6	1.98324	1.00237e-05
907	llmg_0872-llmg_0872-mg6681	0.645527	0.438486	0.649397	0.835888	0.830578	0.921617	6	2.05494	0.000172162
908	llmg_0873-llmg_0873-mg6680	0.451425	0.332482	0.666701	0.621054	0.67618	0.601127	6	1.74746	0.000172581
909	llmg_0874-dapA-MG670	0.84982	0.746127	0.456779	0.389668	0.664849	0.564661	6	1.84409	0.000357178
910	llmg_0875-llmg_0875-mg6676	-0.0168561	0.0716769	0.00694675	-0.220867	0.0409928	-0.142034	6	-1.04431	0.393792
911	llmg_0875-llmg_0875-mg8654	-0.503481	0.106506	-0.0636622	0.0283028	-0.0430079	-0.0047971	6	-1.08331	0.405634
912	llmg_0876-llmg_0876-MG479	0.581667	0.167107	-0.291973	-0.207783	-0.224871	-0.103988	6	-1.0134	0.925866
913	llmg_0877-llmg_0877-mg6672	-0.63435	-1.36186	-0.472729	-0.765931	-0.840543	-0.933753	6	-2.30449	0.00110881
914	llmg_0878-ffh-mg6670	-0.589879	-0.515068	0.123021	0.113809	0.0196682	0.0166508	6	-1.1487	0.343349
915	llmg_0879-speG-MG2697	0.259351	NA	NA	NA	0.78185	0.763336	3	1.82488	0.0723006
916	llmg_0880-llmg_0880-MG2696	-0.789559	-0.568549	0.046698	-0.658204	-0.263844	-0.183323	6	-1.496	0.0273503
917	llmg_0881-azlC-MG2254	-0.0895288	0.373777	0.901436	0.407751	0.394165	0.426182	6	1.49526	0.0256728
918	llmg_0882-llmg_0882-mg5850	NA	0.0798506	-0.0694908	0.150567	0.433921	-0.258153	5	1.06966	0.590717
919	llmg_0883	0.350124	0.264204	-0.369466	-0.308183	-0.347842	-0.348024	6	-1.13488	0.400728
920	llmg_0884-llmg_0884-MG2257	-0.261657	-0.914681	-0.124754	-0.386211	-0.207932	-0.328565	6	-1.44865	0.0233958
921	llmg_0885-proB-MG2259	0.360719	0.0472802	-0.183079	-0.345485	-0.432668	-0.406604	6	-1.17348	0.263549
922	llmg_0886-proA-MG2260	NA	-2.13224	-0.359447	0.353242	-0.398814	-0.555731	5	-1.85632	0.205472
923	llmg_0886-proA-MG2261	0.0646162	-0.0138481	-0.251958	-0.158105	-0.241431	-0.307534	6	-1.16343	0.053153
924	llmg_0887-llmg_0887-mg5859	NA	-0.286805	0.190701	-0.154899	-0.163531	-0.408141	5	-1.17884	0.175735
925	llmg_0888-rarA-MG150292	0.696326	-0.162647	-0.207843	-0.423309	-0.150567	-0.0038243	6	-1.04287	0.800692
926	llmg_0889-llmg_0889-mg7677	NA	-1.84089	-0.548527	-0.523549	-0.214165	-0.44091	5	-2.04134	0.0683206
927	llmg_0890-pyrR-MG2412	-0.10497	-0.0203336	-0.395341	-0.39374	-0.312818	-0.366209	6	-1.30417	0.0102189
928	llmg_0891-pyrP-MG2413	-0.582891	-0.135277	-0.528916	-0.365276	-0.367868	-0.510088	6	-1.51445	0.00155889
929	llmg_0893-pyrB-MG2414	-0.310678	-0.0999923	-0.333344	-0.322997	-0.215663	-0.228775	6	-1.28648	0.00098397
930	llmg_0894-carA-MG2415	-0.263558	-0.499898	-0.488222	-0.293836	-0.31455	-0.251846	6	-1.42189	0.000597764
931	llmg_0895-llmg_0895-MG150293	-0.37849	0.0460456	-0.151212	-0.0137118	0.272476	-2.30813	6	-1.52527	0.325456
932	llmg_0897-llmg_0897-mg6189	-0.34366	NA	-0.444419	NA	1.05242	NA	3	1.09211	0.87207
933	llmg_0898-llmg_0898-MG150294	0.292173	-0.0506518	-0.143591	-0.245394	0.0959837	-0.0499912	6	-1.01706	0.835245
934	llmg_0899-llmg_0899-MG150295	-0.0543112	-0.626279	1.03456	-0.059757	-0.809179	-0.0447594	6	-1.09778	0.737192
935	llmg_0902-arsC-MG1426	NA	-0.468374	NA	1.25385	-0.0476155	-2.07275	4	-1.39615	0.659886
936	llmg_0903-llmg_0903-MG150145	0.0444777	0.455547	0.448074	0.410869	0.432535	0.401965	6	1.44135	0.00242301
937	llmg_0904-llmg_0904-mg5472	-0.131107	0.238383	-0.0840462	0.0796248	-0.183054	-0.0588532	6	-1.02345	0.730278
938	llmg_0905	1.19466	1.75995	-0.878652	0.0986137	-0.921295	0.929207	6	1.43871	0.460783
939	llmg_0906-rpmE-mg5593	-0.439364	0.399254	-0.399785	-0.348079	-0.384713	-0.380424	6	-1.29544	0.107514
940	llmg_0907-llmg_0907-MG931	0.309792	-0.464868	0.527876	0.366386	0.0762425	0.00417786	6	1.14637	0.385229
941	llmg_0908-llrA-MG932	-0.28193	-0.374958	-0.185518	-0.185845	-0.243521	-0.366696	6	-1.314	0.00050679
942	llmg_0909-kinA-MG933	0.634041	0.307721	-0.51857	0.0135791	-0.722788	-0.568906	6	-1.15314	0.550737
943	llmg_0910-amtB-MG934	-0.204311	-0.235843	0.893457	0.266217	0.454455	0.596846	6	1.34331	0.168052
944	llmg_0911-glnB-mg5599	NA	-2.09044	0.593428	0.0322899	0.0905289	-0.115797	5	-1.34716	0.55545
945	llmg_0912-murD-MG1100	0.0469984	0.0766732	0.0182436	0.048683	0.315123	0.286615	6	1.14117	0.0583879
946	llmg_0912-murD-mg5600	0.342997	-0.148636	0.0662085	-0.134888	0.257491	0.108057	6	1.08532	0.36211
947	llmg_0913-murG-MG1101	0.0107243	0.0995949	0.249832	0.162294	0.373737	0.442974	6	1.25006	0.021071
948	llmg_0914-ftsQ-MG1103	0.329895	0.265572	0.391472	0.353462	0.389758	0.391051	6	1.42409	1.1651e-05
949	llmg_0914-ftsQ-MG1104	NA	NA	0.0064719	-0.195356	-0.206029	0.982767	4	1.15831	0.639265
950	llmg_0914-ftsQ-mg5604	0.24809	0.754889	0.417381	0.408209	0.350615	0.108758	6	1.46422	0.00762471
951	llmg_0915-obgL-MG1105	-0.166095	-0.130207	-0.0574541	-0.117397	-0.289099	-0.344477	6	-1.20216	0.009343
952	llmg_0916-llmg_0916-MG150074	0.362595	-0.757287	0.0461213	-0.240621	-0.223652	-0.237831	6	-1.19138	0.299657
953	llmg_0917-llmg_0917-MG1107	1.68331	-1.41381	-3.09686	NA	NA	NA	3	-2.56627	0.570173
954	llmg_0918-llmg_0918-MG150296	NA	0.716731	-1.19274	NA	NA	1.70887	3	1.50825	0.677011
955	llmg_0920-llmg_0920-MG1112	NA	0.563819	-1.52567	0.101895	NA	-0.885784	4	-1.54718	0.42375
956	llmg_0921-llmg_0921-mg5615	NA	NA	-0.645797	-0.0633053	0.103343	-0.671691	4	-1.37625	0.206775
957	llmg_0922-llmg_0922-MG150171	NA	NA	NA	0.689709	0.330711	0.492263	3	1.65571	0.0398661
958	llmg_0922-llmg_0922-MG150171B	NA	1.83052	NA	0.262402	0.251318	-0.340392	4	1.65031	0.360254
959	llmg_0924-llmg_0924-MG891	NA	NA	NA	NA	-0.0231993	-0.700604	2	-1.43606	NA
960	llmg_0926-queA-MG893	-0.352059	0.0224544	NA	0.0713764	-0.167262	0.0934923	5	-1.06865	0.477947
961	llmg_0927-llmg_0927-MG894	-0.027536	NA	NA	NA	0.61505	NA	2	1.34146	NA
962	llmg_0928-nagB-MG1516	-1.32343	-0.490205	-0.648449	-0.537789	-0.687537	-0.69497	6	-2.0759	0.0019567
963	llmg_0929-hmcM-mg5179	0.418822	-2.407	0.140136	0.0737335	-0.147334	-0.413416	6	-1.47576	0.396075
964	llmg_0929-hmcM-mg5181	0.149731	0.0660271	0.0561385	0.166609	-0.0832585	-0.317948	6	1.00624	0.936541
965	llmg_0930-thiL-MG2073	-0.518536	-0.294076	-0.422905	-0.212989	-0.477065	-0.2677	6	-1.4413	0.000799283
966	llmg_0931-mvaA-mg5177	-0.338832	0.334131	-0.198388	-0.380794	-0.183333	-0.447761	6	-1.22446	0.139419
967	llmg_0932-rpsP-MG150297	-0.724654	-0.725384	-0.333099	-0.399639	-0.154478	-0.117659	6	-1.50554	0.0131583
968	llmg_0933-llmg_0933-MG150298	-3.38874	NA	0.93505	-0.92206	-1.74162	-2.06909	5	-4.20928	0.114372
969	llmg_0933-llmg_0933-MG150298B	-0.207561	-0.0182818	-0.198007	-0.212621	-0.857497	-0.868519	6	-1.48253	0.0481608
970	llmg_0934-hemH-MG1707	0.0401782	-0.298702	0.445684	-0.206808	0.387356	0.479478	6	1.15165	0.361173
971	llmg_0935-llmg_0935-MG1708	0.0397355	-0.00458064	0.385286	0.341984	0.380145	0.393311	6	1.29173	0.0198805
972	llmg_0936-rimM-MG1709	-0.631915	-0.702447	-0.139766	-0.151811	-0.288988	-0.416003	6	-1.47475	0.0105695
973	llmg_0937-trmD-MG1710	-0.682187	-0.114266	-0.374888	-0.198561	-0.387787	-0.267063	6	-1.40138	0.00877205
974	llmg_0938-llmg_0938-mg6341	0.0276824	0.0791931	-0.45518	-0.423195	-0.0517252	0.122055	6	-1.12396	0.315163
975	llmg_0939-llmg_0939-MG1712	-0.340372	-0.0590231	-0.109898	-0.293303	0.0239936	-0.0065424	6	-1.13981	0.0885516
976	llmg_0940-dapB-MG1713	0.102426	0.398082	0.353237	0.141707	0.236483	0.287756	6	1.28825	0.00310364
977	llmg_0941-llmg_0941-MG1714	-1.05385	-0.179474	-0.0726026	0.23668	0.197951	0.19279	6	-1.11973	0.596769
978	llmg_0942-papL-mg6345	0.173757	0.135668	-0.102151	-0.135773	0.30842	0.180296	6	1.09787	0.24767
979	llmg_0942-papL-mg6346	0.354686	-0.249024	-0.284264	-0.139144	0.0318424	0.102038	6	-1.03112	0.769299
980	llmg_0943-pepDB-mg5031	0.0677325	0.193557	0.12177	0.0434548	-0.428878	-0.00690325	6	-1.00155	0.986966
981	llmg_0944	0.509173	0.141606	0.184319	0.182931	-0.29081	0.437425	6	1.21423	0.152169
982	llmg_0945-llmg_0945-MG150146	0.83213	1.01076	1.51919	2.15255	1.82153	1.98051	6	4.72459	0.000850828
983	llmg_0947-cmhR-MG2178	1.21539	1.0791	1.46227	1.65643	1.60228	1.45609	6	4.10385	2.04944e-05
984	llmg_0948-llmg_0948-MG2180	0.184099	0.189931	0.063498	0.15451	0.122821	0.109443	6	1.14727	0.0009412
985	llmg_0948-llmg_0948-mg6708	0.132154	-0.05885	0.314217	0.384818	0.537716	0.425074	6	1.33534	0.0223975
986	llmg_0950-llmg_0950-MG2182	-0.20214	0.269812	0.152214	0.172823	-0.00178587	0.0451574	6	1.07539	0.331352
987	llmg_0951-msrA-MG2183	-0.484892	-0.63157	-0.149307	-0.116209	-0.527011	-0.412009	6	-1.47231	0.00626633
988	llmg_0952-pyrDA-MG2184	0.305161	0.442498	0.266028	0.193331	0.345777	0.299342	6	1.36164	0.000267974
989	llmg_0953-llmg_0953-MG2185	0.23196	-0.224433	-0.111091	-0.00654541	0.10628	0.190264	6	1.03156	0.686593
990	llmg_0954-llmg_0954-mg6701	-0.179446	NA	0.144343	-0.0440311	-0.00958811	0.0672255	5	-1.00431	0.940955
991	llmg_0955-llmg_0955-MG2187	0.182962	0.135	-0.0105671	-0.100285	0.0503125	0.136243	6	1.06781	0.193045
992	llmg_0956-llmg_0956-MG2188	0.14099	0.217864	0.225874	-0.256208	-0.157858	0.124582	6	1.05044	0.581925
993	llmg_0957-rpe2-mg6698	-0.0556884	-2.68497	-0.520905	-0.250572	-0.401529	-0.107638	6	-1.95466	0.162396
994	llmg_0958-rpiB-MG1499	0.458748	0.0478533	-0.599165	0.0853361	-0.55148	-0.708838	6	-1.23523	0.323666
995	llmg_0959-llmg_0959-mg6696	-0.850767	-0.739372	-0.400154	-0.428292	-0.349617	-0.0287452	6	-1.59386	0.0116544
996	llmg_0960-llmg_0960-MG150205	-0.674916	-0.630047	-0.538158	-0.453777	-0.145545	-0.120176	6	-1.53281	0.00735474
997	llmg_0961-llmg_0961-mg5589	0.128021	NA	1.62048	-1.44535	NA	1.11465	4	1.4254	0.635953
998	llmg_0962-llmg_0962-mg5587	0.718889	0.952847	NA	0.238204	-1.02923	0.0912256	5	1.21457	0.60172
999	llmg_0962-llmg_0962-mg5588	0.872005	-2.86834	NA	NA	3.18643	0.641985	4	1.58094	0.738134
1000	llmg_0963-llmg_0963-MG150299	NA	2.37097	NA	-1.02767	NA	NA	2	1.95747	NA
1001	llmg_0963-llmg_0963-MG2694	0.605264	-0.0672307	-0.413493	-0.777764	NA	NA	4	-1.1774	0.617773
1002	llmg_0964-thyA-MG150147	0.208785	-0.195614	0.10135	0.152484	0.066662	0.130059	6	1.08035	0.240135
1003	llmg_0965-llmg_0965-MG150172	NA	0.672335	0.599519	-0.402094	0.455506	0.0106658	5	1.30628	0.258373
1004	llmg_0965-llmg_0965-MG150172B	0.188288	-0.481276	-0.108828	0.0554796	0.131501	-0.0176107	6	-1.0395	0.710082
1005	llmg_0966-rmaI-MG150206	-0.202544	-0.654004	0.364286	0.252519	0.0422234	0.113381	6	-1.01412	0.929339
1006	llmg_0967-llmg_0967-mg5375	-0.541686	-2.9894	NA	0.94696	-0.640048	-0.603034	5	-2.14994	0.292032
1007	llmg_0968-llmg_0968-mg5374	0.458172	NA	0.201196	-0.275691	0.0936153	-0.40712	5	1.01413	0.933532
1008	llmg_0969-llmg_0969-mg5373	0.295308	0.543824	-0.653495	0.252876	-0.09074	-0.342675	6	1.00085	0.996466
1009	llmg_0970-llmg_0970-MG150300	NA	-5.34596	-0.239986	-0.553435	0.198043	0.0406547	5	-3.25482	0.323642
1010	llmg_0971-yphI-MG150301	-0.0576042	0.184901	-0.238489	-0.245846	-0.299907	-0.158034	6	-1.14549	0.12111
1011	llmg_0972-llmg_0972-MG2327	1.96621	0.39834	-0.39037	2.57983	0.0864862	-1.64921	6	1.64633	0.467449
1012	llmg_0973-purC-MG2328	-1.10942	-2.11063	-1.40436	-0.493834	-0.700793	-0.733847	6	-2.98067	0.00645604
1013	llmg_0974	-0.968501	-1.16178	-1.26904	-1.22588	-0.911615	-1.01421	6	-2.97974	9.20682e-06
1014	llmg_0975-purQ-MG2330	-1.14958	-3.14758	-0.884526	-0.865396	-0.93785	-1.10152	6	-3.84872	0.013825
1015	llmg_0976-purL-MG2331	0.148156	NA	-0.143913	0.484708	-1.5677	-0.334264	5	-1.32658	0.464496
1016	llmg_0977-purF-MG2332	-1.5036	0.296283	-0.115093	0.224531	-0.0820671	0.129331	6	-1.19137	0.550861
1017	llmg_0978-llmg_0978-MG2333	0.877247	0.254307	NA	-0.230676	-0.296775	-0.524099	5	1.01613	0.952017
1018	llmg_0979-llmg_0979-mg8718	0.24352	-0.127638	-0.16206	0.169883	-0.253271	0.0338848	6	-1.01607	0.850801
1019	llmg_0980-llmg_0980-MG2336	0.010749	0.264231	0.35195	-0.19629	-0.00935866	0.659157	6	1.1973	0.210735
1020	llmg_0984-llmg_0984-MG150075	NA	0.68501	0.0806377	-0.697136	-0.248351	0.596496	5	1.0869	0.764003
1021	llmg_0985-llmg_0985-MG2286	-0.591714	0.992243	NA	0.0542252	1.53026	0.100834	5	1.51766	0.328807
1022	llmg_0986-clpB-mg8116	0.196352	0.86768	0.353228	0.291276	-0.149097	-0.0996852	6	1.27544	0.166524
1023	llmg_0987-purM-MG2288	-0.958337	-0.98059	-0.282892	-0.228116	-0.388072	-0.148137	6	-1.64492	0.022399
1024	llmg_0988-purN-mg7521	NA	1.02177	-0.185542	NA	-0.774023	-0.579172	4	-1.13796	0.769326
1025	llmg_0988-purN-mg8118	-0.3088	-0.459772	-0.0898864	0.278216	-0.450114	-0.47618	6	-1.28542	0.0937679
1026	llmg_0989-llmg_0989-MG1517	0.169064	0.0904192	-0.716382	-0.812713	-0.612618	-0.993492	6	-1.61492	0.0614724
1027	llmg_0991-llmg_0991-MG1766	-0.778059	-0.685579	0.0593792	0.108007	-0.383821	-0.133813	6	-1.35299	0.106105
1028	llmg_0992-llmg_0992-MG1765	-0.385558	-0.129263	0.114215	-0.267327	0.367932	-0.366091	6	-1.11741	0.403988
1029	llmg_0993-hprT-MG1763	-0.882828	-0.365881	-0.702144	-0.782387	-0.984078	-0.671398	6	-2.0781	0.000391695
1030	llmg_0994-purH-MG1449	-0.961001	0.384697	NA	0.033572	-3.68707	NA	4	-2.87902	0.334464
1031	llmg_0994-purH-MG1761	-2.33256	NA	0.507676	-1.95093	-0.388777	-0.06672	5	-2.33092	0.199596
1032	llmg_0994-purH-mg5878	-1.61024	-3.1618	-1.01827	-1.33698	-0.886587	-0.0900361	6	-3.85995	0.023342
1033	llmg_0995-llmg_0995-mg5880	-0.138465	-0.083541	-0.231362	-0.00999274	-0.428882	-0.363468	6	-1.2328	0.0255829
1034	llmg_0996-llmg_0996-mg5884	0.502663	0.396267	0.0830863	-0.34586	-0.156888	-0.0974458	6	1.06571	0.657011
1035	llmg_0997-purD-MG1624	-0.972769	-0.302109	-0.766703	-0.376734	-0.129877	-0.436318	6	-1.64447	0.0115006
1036	llmg_0997-purD-MG1625	-0.194866	NA	-0.581259	1.69981	0.568921	-0.673251	5	1.17806	0.729643
1037	llmg_0999-purE-MG1628	NA	NA	NA	0.0594768	-0.628203	-0.227656	3	-1.30403	0.314586
1038	llmg_1000-purK-MG1630	0.997327	0.336171	-0.345006	-0.196958	0.0319152	0.0489468	6	1.1565	0.489671
1039	llmg_1001-xylR-MG1631	-0.324168	-0.445918	-0.531146	-0.0480665	-0.451123	-0.422652	6	-1.44848	0.00320206
1040	llmg_1002-xylA-MG1632	-0.89123	NA	NA	-0.686797	-0.589357	NA	3	-2.0595	0.0148222
1041	llmg_1003-tnp1216-MG150005	0.243155	-0.180242	0.40269	-0.453489	0.0870927	0.278085	6	1.0649	0.653254
1042	llmg_1004-llmg_1004-MG1633	NA	NA	-1.33	NA	-2.04091	NA	2	-5.39492	NA
1043	llmg_1005-llmg_1005-MG1634	NA	NA	0.261105	-0.0383965	-1.82463	NA	3	-1.7057	0.498339
1044	llmg_1006-scrK-MG1635	0.0658544	NA	NA	NA	NA	NA	1	1.06807	NA
1045	llmg_1008-guaA-MG1637	0.311631	0.13776	-0.0417159	0.247869	-0.221748	-0.170115	6	1.04493	0.647838
1046	llmg_1009-lplB-mg8499	NA	NA	NA	0.145316	0.730264	NA	2	1.54928	NA
1047	llmg_1010-lplC-mg8500	NA	NA	NA	-1.00543	-0.679109	-0.892879	3	-2.36112	0.0121812
1048	llmg_1011-lplA-mg10676s	NA	NA	-0.762812	0.0274045	0.965625	-0.675147	4	-1.11765	0.799085
1049	llmg_1012-llmg_1012-MG150302	0.199315	NA	-0.52827	0.397127	0.703502	NA	4	1.21278	0.514604
1050	llmg_1013-llmg_1013-MG150076	0.567843	-1.4618	-0.501337	-0.36199	-0.426922	-0.208747	6	-1.49007	0.193227
1052	llmg_1014-llmg_1014-mg10679s	0.103674	NA	1.17675	-0.143099	NA	0.497054	4	1.5047	0.251004
1051	llmg_1014-llmg_1014-MG150077	3.6208	NA	NA	NA	NA	NA	1	37.3674	NA
1053	llmg_1014-llmg_1014-mg5719	NA	1.19003	NA	-0.708267	-0.0856462	-1.43205	4	-1.29561	0.673014
1054	llmg_1015-ypbC-MG150148	-0.976453	0.0423667	-0.26725	-0.0264418	-0.637052	-0.484521	6	-1.47928	0.0558661
1055	llmg_1016-llmg_1016-MG150207	0.412181	-0.248467	-0.635895	-0.719572	-0.405383	-0.800694	6	-1.49128	0.0803129
1056	llmg_1016-llmg_1016-MG150303	NA	NA	-1.00441	-0.806197	1.27462	NA	3	-1.19561	0.829226
1057	llmg_1017-rmaE-MG150208	-0.106912	-0.301903	-0.0530228	-0.0270714	-0.499552	-0.475135	6	-1.27626	0.0370905
1058	llmg_1019-llmg_1019-MG2484	NA	NA	NA	-0.513755	NA	0.357614	2	-1.0812	NA
1059	llmg_1020-rmeB-MG2483	NA	NA	NA	NA	NA	-4.72056	1	-112.231	NA
1060	llmg_1021-llmg_1021-MG2482	NA	0.128442	NA	NA	NA	NA	1	1.13705	NA
1061	llmg_1023-fur-mg10632s	-0.206977	-0.235393	0.201612	0.118723	-0.00950356	0.00246536	6	-1.02175	0.773436
1062	llmg_1024	-0.0482865	0.0249533	0.277153	0.238815	0.229212	0.244559	6	1.17476	0.0343767
1063	llmg_1025-llmg_1025-mg6408	-0.827483	-0.99442	0.451974	0.249996	0.128023	0.169541	6	-1.1469	0.606896
1064	llmg_1026-llmg_1026-mg6409	-0.459985	-0.464095	0.125834	0.0902477	-0.0928675	-0.11777	6	-1.16545	0.20578
1065	llmg_1027-rmaC-MG1096	-0.0355075	-0.495698	-0.0416752	1.89336	-0.361303	-0.257966	6	1.12397	0.760387
1066	llmg_1028-llmg_1028-MG1095	-0.228934	-0.488851	0.354221	0.279914	-0.285791	-0.363183	6	-1.12987	0.434218
1067	llmg_1029-llmg_1029-mg6412	-0.0752537	-2.66013	0.0948697	0.186325	-0.0230392	-0.517999	6	-1.64741	0.311389
1068	llmg_1030-trpE-MG751	1.56421	0.839489	1.45236	1.01408	0.892723	0.684717	6	2.92881	0.000693138
1069	llmg_1031-trpG-MG750	2.27259	-0.240281	NA	NA	0.634074	NA	3	2.4322	0.350884
1070	llmg_1032-trpD-MG749	0.763732	0.923752	0.66408	0.863366	0.760098	0.371823	6	2.06365	0.000267138
1071	llmg_1034	0.98015	1.0679	1.07818	0.733287	0.598845	0.473345	6	2.27494	0.000544081
1072	llmg_1035	1.79018	1.65995	0.745173	0.799546	0.88322	0.84273	6	3.06527	0.00213842
1073	llmg_1038-trpC-MG740	0.497559	-1.11226	3.79997e-05	0.336114	0.543672	0.835481	6	1.20134	0.544385
1074	llmg_1039-trpF-MG739	NA	NA	NA	0.926668	NA	0.175701	2	1.73531	NA
1075	llmg_1040-llmg_1040-MG738	1.23256	1.11603	1.67434	0.506475	1.08422	1.36172	6	3.1981	0.000719811
1076	llmg_1041-trpB-MG737	0.680885	1.30389	0.755619	0.985077	0.402264	0.864886	6	2.29815	0.00110861
1077	llmg_1042-trpA-MG736	NA	NA	0.609789	NA	1.01822	-0.547234	3	1.4337	0.522558
1078	llmg_1045-bglP-mg5500	0.4705	NA	-0.297216	NA	0.45791	-2.15604	4	-1.46406	0.581125
1079	llmg_1046-bglH-MG150149	-0.260358	0.921864	0.016747	-0.00262538	-0.105609	-0.055575	6	1.08952	0.639384
1080	llmg_1047-busR-MG2669	-0.113411	-0.192262	-0.642748	-0.615596	-0.181656	-0.171007	6	-1.37637	0.0229844
1081	llmg_1048-busAA-MG2670	0.105623	-0.106933	0.0769022	0.0522046	0.505828	0.510148	6	1.21001	0.128494
1083	llmg_1049-busAB-mg10717s	1.00173	0.706468	0.495142	0.491232	1.41738	1.22847	6	2.4353	0.00247854
1082	llmg_1049-busAB-MG2671	-0.440888	-0.353822	-0.0107151	0.0200564	0.431069	0.329331	6	-1.00417	0.977923
1084	llmg_1050-llmg_1050-MG150078	-0.216365	-0.633958	-0.100283	0.117819	0.120798	-0.0667602	6	-1.13859	0.306911
1085	llmg_1051-llmg_1051-mg10622s	-1.45564	-0.685207	0.463362	0.192572	0.392808	0.16657	6	-1.16679	0.639674
1086	llmg_1052-llmg_1052-MG2675	1.18177	0.372654	NA	NA	0.373071	NA	3	1.90123	0.140051
1087	llmg_1053	-0.58639	-1.97127	0.799664	-1.00037	-2.04888	0.111854	6	-2.18708	0.151134
1088	llmg_1054-llmg_1054-MG150002	0.287714	0.341269	-0.245393	-0.204281	-0.271315	-0.325378	6	-1.07204	0.595249
1089	llmg_1055-llmg_1055-mg8258	NA	NA	1.03802	NA	NA	NA	1	2.82361	NA
1090	llmg_1056-llmg_1056-mg8257	-0.322586	NA	0.0279327	-0.294564	0.238637	-0.257873	5	-1.1294	0.329789
1091	llmg_1057-llmg_1057-mg8254	-0.504096	0.119008	0.307421	0.0420007	-0.261736	-0.455877	6	-1.13377	0.394891
1092	llmg_1058-coaA-mg8270	-0.585195	-0.42187	-0.341145	-0.333358	-0.195037	-0.271829	6	-1.43057	0.00127159
1093	llmg_1059-rsmC-mg8268	-0.189914	-0.332984	-0.415269	-0.405378	-0.48139	-0.509279	6	-1.47556	0.000426931
1094	llmg_1060-pdp-MG150150	-0.51835	-0.169392	-0.0444104	0.0243928	-0.00665624	-0.123368	6	-1.14985	0.14649
1095	llmg_1061-llmg_1061-MG150079	-0.503056	-0.44102	-0.385228	-0.26207	-0.502375	-0.474221	6	-1.53418	9.37886e-05
1096	llmg_1062-deoC-MG150173	-0.293655	-0.124295	0.00181033	-0.125883	-0.567983	-0.539135	6	-1.31634	0.0355024
1097	llmg_1063-cdd-MG150209	-0.292671	0.0770564	0.0545079	0.0465194	-0.446964	-0.499524	6	-1.19345	0.166584
1098	llmg_1064-bmpA-MG1201	0.297004	-0.309319	-0.235955	0.0157222	-0.080504	-0.0237988	6	-1.05775	0.54791
1099	llmg_1065-rgrB-MG1199	0.312077	-0.836848	0.13883	-0.212489	-0.264031	-0.0470731	6	-1.16368	0.394816
1100	llmg_1066-llmg_1066-MG1198	0.625775	0.168978	-0.373491	-0.646614	-1.29821	-0.341819	6	-1.36465	0.302887
1101	llmg_1067-kinB-MG1196	-0.683257	-0.326248	-0.347562	-0.290123	-0.331321	-0.285605	6	-1.45842	0.00172835
1102	llmg_1068-llrB-MG1195	-1.15386	-1.59225	-0.167477	-0.323168	-0.332759	-0.338863	6	-1.91822	0.0401365
1103	llmg_1069-llmg_1069-mg8122	-0.119658	-0.293829	-0.142146	-0.160419	-0.122888	-0.110552	6	-1.17146	0.00244036
1104	llmg_1070-llmg_1070-MG1039	NA	NA	-1.78142	NA	-1.14378	1.73185	3	-1.48852	0.748101
1105	llmg_1077-llmg_1077-mg13225s	-0.730356	-0.927211	-0.108183	-0.0833363	0.107271	-0.0355809	6	-1.34478	0.147544
1106	llmg_1078-llmg_1078-MG172	NA	-0.552753	2.67957	-0.088106	-0.232156	1.30605	5	1.86362	0.361498
1107	llmg_1079-llmg_1079-mg6148	-2.97691	0.136071	-0.253566	0.230998	NA	NA	4	-2.04593	0.416237
1108	llmg_1080-uspA2-MG174	-1.29936	-0.0632189	-0.177069	-0.572032	-0.588784	-0.914884	6	-1.82679	0.0236905
1109	llmg_1081-llmg_1081-mg6146	-0.550885	-1.19212	-0.479002	-0.278712	-0.235101	-0.330281	6	-1.66699	0.0167686
1110	llmg_1082-llmg_1082-MG2380	NA	0.557479	-0.224901	-0.604508	0.0609606	-0.336439	5	-1.1157	0.609684
1111	llmg_1083-llmg_1083-MG2379	NA	NA	-1.36678	NA	NA	-0.693691	2	-2.80173	NA
1112	llmg_1084-llmg_1084-MG2378	-0.476479	NA	-1.17725	-1.54115	1.13135	NA	4	-1.67512	0.447552
1113	llmg_1085-llmg_1085-MG150174	-0.0474453	-0.306682	0.0562947	0.30749	0.252997	0.255294	6	1.09016	0.41133
1114	llmg_1086-llmg_1086-MG1044	0.416379	-0.215997	0.104399	0.211957	0.213322	0.324175	6	1.19209	0.107355
1115	llmg_1086-llmg_1086-MG495	-0.292956	-0.262433	0.258127	0.322264	0.0515728	0.0559789	6	1.02234	0.841018
1116	llmg_1087-acmC-MG494	-0.54142	-0.898792	-0.053894	-0.0864088	-0.514361	-0.709677	6	-1.59588	0.0193524
1117	llmg_1088-gpo-MG492	-0.477365	-0.728452	0.371212	0.677	0.0711562	-0.162719	6	-1.0424	0.853872
1118	llmg_1089-llmg_1089-MG491	-0.631123	-0.733542	-0.927388	-0.916657	-0.611087	-0.62629	6	-2.09806	6.13122e-05
1119	llmg_1090-llmg_1090-MG490	-0.890831	-0.520937	0.376817	0.133431	-0.793952	-0.101489	6	-1.34918	0.213777
1120	llmg_1091-llmg_1091-MG150304	-0.329187	-0.11043	0.425684	0.209354	-0.0549368	-0.219709	6	-1.01329	0.912958
1121	llmg_1092-llmg_1092-MG487	-0.127528	-0.376313	0.145237	0.365958	0.00307173	-0.0187444	6	-1.00139	0.989699
1122	llmg_1093-llmg_1093-MG1445	NA	-0.369845	-0.472269	-0.563657	0.325367	0.0595305	5	-1.22651	0.296176
1123	llmg_1093-llmg_1093-MG150305	NA	-3.0993	1.39646	-0.303111	0.949985	-0.221512	5	-1.2911	0.760656
1124	llmg_1094-llmg_1094-mg6718	-0.40501	-0.535874	-0.305816	-0.415924	-1.16947	-0.00931634	6	-1.60571	0.0295659
1125	llmg_1095-llmg_1095-MG1443	-0.333667	-2.14584	1.02813	-0.370797	-0.353872	-0.373482	6	-1.52947	0.349633
1126	llmg_1096-llmg_1096-MG1442	1.00233	0.528983	-0.366531	-0.328987	0.934953	NA	5	1.42497	0.300169
1127	llmg_1097-glpF2-mg6715	-1.39711	-0.0765082	-1.13834	-0.943206	-1.09976	NA	5	-2.537	0.0145598
1128	llmg_1098-glpD-mg6714	-0.0888241	-0.327175	-1.00439	-0.757424	-0.344585	-0.426694	6	-1.63479	0.014992
1129	llmg_1098-glpD-mg8497	-0.382791	-0.18869	-0.671064	-0.787538	-0.466399	-0.551761	6	-1.66203	0.00206201
1130	llmg_1099-glpK-MG897	-0.205142	NA	NA	NA	NA	NA	1	-1.2277	NA
1131	llmg_1100-rluC-MG1873	-0.463105	-0.872068	0.137169	0.178136	-0.100509	0.0437803	6	-1.19654	0.333716
1132	llmg_1101-llmg_1101-MG1872	0.715862	0.10062	0.19521	0.229822	0.214683	0.218148	6	1.32188	0.0262431
1133	llmg_1102-llmg_1102-MG1871	0.178198	-0.0618682	0.234879	0.329693	0.251617	0.247616	6	1.21737	0.0163407
1134	llmg_1103-llmg_1103-MG1870	0.192276	-0.205605	0.0781839	0.0558616	0.150056	0.0841222	6	1.06093	0.34608
1135	llmg_1104-llmg_1104-MG1868	0.712668	0.660979	0.494411	-0.0119556	0.262816	0.05983	6	1.43781	0.0338516
1136	llmg_1105-pyrK-MG1867	-0.137143	-0.606613	-0.41732	-0.308969	-0.245683	-0.140033	6	-1.36246	0.00845885
1137	llmg_1106-pyrDB-MG1866	-0.219723	-0.0554094	-0.219578	-0.293147	0.0904246	0.00789181	6	-1.12179	0.121925
1138	llmg_1107-pyrF-MG1865	-0.0452348	0.176591	-0.210697	-0.16736	-0.147085	-0.159403	6	-1.09658	0.174107
1139	llmg_1108-llmg_1108-mg5963	0.118141	0.123069	-0.239454	-0.369327	-0.535707	-0.562634	6	-1.27675	0.10789
1140	llmg_1109-gidB-MG1862	-0.0680886	-0.765868	-0.0123217	0.0315749	-0.247718	-0.0936068	6	-1.21248	0.172391
1141	llmg_1110-ispB-MG1861	-0.191908	-0.0229393	-0.233328	-0.296524	-0.187816	-0.205695	6	-1.20889	0.00374693
1142	llmg_1111-GerCA-MG1860	-0.240678	-0.297442	-0.248735	-0.0565585	0.0429754	0.112466	6	-1.12149	0.162432
1143	llmg_1112-llmg_1112-MG1859	0.110664	0.00853912	-0.473302	-0.368515	-0.332495	-0.342298	6	-1.26226	0.0589993
1144	llmg_1113-galU-MG1858	0.232931	0.11328	0.175262	0.162054	0.148483	0.141362	6	1.17613	0.000186579
1145	llmg_1114-gpsA-MG1857	-0.116345	0.0714934	0.159288	0.0399239	-0.140785	0.114468	6	1.02157	0.68882
1146	llmg_1115-llmg_1115-mg5954	0.409831	-1.78695	3.39955	0.596041	0.07093	1.14651	6	1.89519	0.394489
1147	llmg_1116-telA-mg5953	0.112932	-0.198633	0.237568	0.197304	0.535873	0.314615	6	1.22133	0.099341
1148	llmg_1117-nagA-mg5239	-0.562094	-0.200414	-0.260146	-0.218979	-0.373205	-0.293583	6	-1.37447	0.00214649
1149	llmg_1118-pfk-MG1704	0.276607	0.267443	0.144693	0.124278	-0.0784791	-0.0661624	6	1.11784	0.139139
1150	llmg_1119-pyk-mg7987	0.220167	0.240119	0.238412	0.206294	0.015411	0.0076327	6	1.16728	0.0193637
1151	llmg_1120-ldh-mg7984	-0.142316	0.284309	0.158986	0.154679	-0.437644	-0.70833	6	-1.12193	0.503259
1152	llmg_1121-nupC-MG322	0.558381	-0.803921	-0.467389	0.0141252	0.674391	-0.300797	6	-1.0557	0.829119
1153	llmg_1122-nupB-MG321	-0.00459827	-0.151185	0.197012	0.124468	0.193015	0.248627	6	1.10652	0.162665
1154	llmg_1123-nupA-mg7980	0.332395	0.288353	NA	0.159314	0.524006	0.513242	5	1.4383	0.00637173
1155	llmg_1124-llmg_1124-MG973	0.402761	0.832207	0.734514	1.13878	0.182631	-0.0733964	6	1.70958	0.0326097
1156	llmg_1125-fbpA-mg7976	0.360747	0.66772	0.766821	-0.0895109	0.385062	0.222354	6	1.4704	0.0282778
1157	llmg_1126-llmg_1126-MG2082	-0.351056	-1.17494	0.203805	0.143215	-0.0334679	0.027499	6	-1.21834	0.391926
1158	llmg_1127-llmg_1127-MG2081	-2.26264	-0.569503	-0.938348	-0.449898	-0.356438	-0.416631	6	-2.29847	0.038498
1159	llmg_1127-llmg_1127-mg7973	2.25798	NA	NA	NA	0.652413	-0.173868	3	2.48974	0.329618
1160	llmg_1130-llmg_1130-mg7968	-8.20889	NA	0.157056	0.490154	-1.76326	-0.990367	5	-7.87002	0.263813
1161	llmg_1131-panE-MG2076	0.159425	0.0891085	-0.0210888	0.0505618	-0.097258	-0.0935381	6	1.01464	0.744247
1162	llmg_1132-sbcD-MG2074	-0.536387	0.20461	0.207822	0.20389	0.364627	0.417689	6	1.15455	0.355378
1163	llmg_1132-sbcD-MG2075	-0.255517	0.508008	0.434562	0.234756	0.377927	0.417751	6	1.33142	0.0544333
1164	llmg_1133-sbcC-mg7963	-0.378388	0.608873	0.1796	0.547619	0.355888	-0.0326001	6	1.238	0.221137
1165	llmg_1133-sbcC-mg7964	0.235681	-0.336474	-0.135826	-0.0271891	0.405525	0.137921	6	1.04771	0.687544
1166	llmg_1134-llmg_1134-MG150306	NA	NA	0.286476	0.0521396	0.387115	-0.224852	4	1.1334	0.425587
1167	llmg_1135-llmg_1135-mg10741s	0.161356	-0.592538	-0.100702	-0.0887357	-0.545323	-0.361001	6	-1.2898	0.0880358
1168	llmg_1136-mtsB-MG1390	-0.641442	-1.70662	-0.201413	-0.00702717	-0.0902852	-0.712355	6	-1.75042	0.0822941
1169	llmg_1137-mtsC-MG1391	-0.0152433	1.77946	NA	4.76336	0.075452	-0.724082	5	3.2407	0.299298
1170	llmg_1137-mtsC-mg7955	-0.830561	-0.62198	-0.218745	-0.268829	-0.147454	-0.0815061	6	-1.4355	0.0307452
1171	llmg_1138-mtsA-MG1392	-0.890357	-0.455528	-0.344237	-0.296416	0.00580184	-0.090775	6	-1.41235	0.0440752
1172	llmg_1139-llmg_1139-MG1393	-2.37667	0.263944	0.00996857	1.42033	-0.0684218	0.236771	6	-1.08946	0.872759
1173	llmg_1140-llmg_1140-MG1394	-0.351576	-0.0483489	-0.0420269	-0.0859661	-0.107958	0.0125399	6	-1.10948	0.103877
1174	llmg_1140-llmg_1140-MG150307	-1.86072	0.104867	-0.00460821	0.376793	-0.257597	0.16972	6	-1.27795	0.495908
1175	llmg_1143-llmg_1143-mg5106	NA	NA	NA	NA	NA	NA	0	#VALUE!	NA
1176	llmg_1148-llmg_1148-MG1968	0.0612176	0.365111	0.69771	0.613768	-0.552494	-0.138333	6	1.19065	0.412154
1177	llmg_1148-llmg_1148-MG1969	1.13438	0.899507	NA	0.745197	NA	-2.01595	4	1.2102	0.813202
1178	llmg_1149-ocd-MG1970	-0.315917	-0.568722	-0.305235	-0.219489	-0.481002	-0.336167	6	-1.44931	0.000877478
1179	llmg_1150-llmg_1150-MG1971	-0.746611	-3.18696	0.47809	-0.259709	0.0728753	0.135435	6	-1.79406	0.334327
1180	llmg_1151-llmg_1151-MG1972	0.0221407	-0.181946	-0.111519	-0.167022	0.116931	0.0709237	6	-1.04263	0.461234
1181	llmg_1152-llmg_1152-MG1973	-0.909262	-1.59733	-0.883504	-1.11067	-0.356928	-0.355145	6	-2.38406	0.00638426
1182	llmg_1153-pabA-MG1974	-0.363661	-0.615286	-0.0341292	-0.0288691	-0.0921581	-0.242123	6	-1.25781	0.0583776
1183	llmg_1154-pabB-MG1975	-0.472966	-0.453779	0.057231	-0.0334962	-0.011213	-0.0191789	6	-1.16832	0.174003
1184	llmg_1154-pabB-MG1976	-0.845749	-0.370191	-0.212173	-0.0699942	0.00524881	-0.0524451	6	-1.29376	0.104432
1185	llmg_1155-trmA-mg7186	-0.266011	NA	-0.70566	-0.516277	0.0522614	0.0517821	5	-1.31888	0.141268
1186	llmg_1156-llmg_1156-mg7187	0.924979	NA	-0.662305	-0.704995	0.304352	0.378898	5	1.04937	0.886711
1187	llmg_1158	-2.06623	-1.07446	-0.604249	0.203175	0.498558	0.251684	6	-1.59242	0.299197
1188	llmg_1159-llmg_1159-mg7190	NA	NA	0.0464878	NA	-1.86148	1.24761	3	-1.20819	0.853851
1189	llmg_1160-llmg_1160-MG1983	-0.369847	-2.62353	0.0215122	0.125412	0.572624	1.0156	6	-1.23331	0.703741
1190	llmg_1161-llmg_1161-MG150210	-1.96209	1.56304	0.308739	-0.776933	-0.208339	NA	5	-1.24001	0.730955
1191	llmg_1162-llmg_1162-MG1987	-1.78147	0.860188	-0.655138	0.388156	0.242525	0.144164	6	-1.14293	0.743244
1192	llmg_1162-llmg_1162-MG1988	-0.0485875	-0.0123678	-1.07981	NA	-1.97969	-0.302217	5	-1.98285	0.143239
1193	llmg_1162-llmg_1162-mg7196	-3.06348	-1.4572	-0.422995	-0.190708	-0.516294	-0.324585	6	-2.7071	0.0790509
1194	llmg_1163-llmg_1163-MG1817	0.947258	NA	-0.103754	-0.203553	NA	1.27755	4	1.61506	0.28812
1195	llmg_1164-llmg_1164-MG1818	NA	NA	-2.39599	NA	0.190519	NA	2	-3.0124	NA
1196	llmg_1165-llmg_1165-MG1819	-0.549336	0.374622	NA	NA	NA	-0.486995	3	-1.24679	0.536465
1197	llmg_1166-llmg_1166-MG1820	-1.38008	NA	NA	NA	-1.76004	NA	2	-4.80692	NA
1198	llmg_1167-llmg_1167-MG150080	NA	-0.355497	NA	NA	NA	NA	1	-1.42689	NA
1199	llmg_1168-llmg_1168-MG1822	-0.227812	0.221687	-0.087416	-0.125476	-0.237253	-0.299392	6	-1.13422	0.160241
1200	llmg_1169-aguA-MG150308	0.195807	-3.44317	-1.90955	-1.05582	-2.54328	-0.359018	6	-4.56844	0.0421115
1201	llmg_1169-aguA-MG1586	NA	0.846699	-0.29135	-0.446342	0.0581119	NA	4	1.04266	0.893965
1202	llmg_1170-llmg_1170-MG150081	0.749672	0.289466	-0.730125	0.281562	1.07992	-0.46619	6	1.22228	0.509637
1203	llmg_1170-llmg_1170-MG150081B	NA	0.745518	-2.89672	-0.0640269	NA	NA	3	-2.0926	0.572511
1204	llmg_1170-llmg_1170-mg5898	NA	-1.41169	0.650153	0.042345	1.24871	0.0375753	5	1.1201	0.810295
1205	llmg_1171-llmg_1171-mg5900	-3.47333	0.665973	0.142112	0.0948396	0.0171519	0.379414	6	-1.43664	0.589933
1206	llmg_1172-rdrB-mg5901	0.101156	-0.0799045	0.227149	0.40997	0.566884	0.243931	6	1.27745	0.0457816
1207	llmg_1173-llmg_1173-MG2139	NA	-5.92961	NA	NA	NA	NA	1	-376.01	NA
1208	llmg_1173-llmg_1173-mg5361	0.876927	1.10544	NA	-0.366255	NA	-0.743737	4	1.2437	0.664705
1209	llmg_1173-llmg_1173-mg5362	-0.120441	0.908887	1.16365	0.559084	0.828811	0.876098	6	2.01916	0.0119964
1210	llmg_1174-llmg_1174-MG2140	0.882362	-0.123203	0.299526	0.864387	1.20072	0.394231	6	1.79739	0.0309647
1211	llmg_1175-llmg_1175-mg5359	-0.847401	-0.0573573	-0.240399	-0.162181	-0.1412	-0.232637	6	-1.32339	0.0615239
1212	llmg_1176-rnhB-MG384	-0.449028	-1.1958	-0.0644134	-0.252743	-0.494742	-0.435882	6	-1.61947	0.0277844
1213	llmg_1177-gadR-MG385	0.136333	0.660537	-0.939999	-0.0531962	-0.333294	0.836638	6	1.0525	0.855491
1214	llmg_1178-gadC-MG386	NA	0.078798	NA	NA	NA	-0.245721	2	-1.08704	NA
1215	llmg_1179-gadB-MG387	0.678608	-1.46393	1.3206	-0.997848	NA	NA	4	-1.1226	0.872816
1216	llmg_1180-llmg_1180-MG388	0.585605	-0.115363	0.468673	0.26381	0.706179	0.523286	6	1.49985	0.0197233
1217	llmg_1181-ilvE-MG389	-0.083173	-3.55763	-0.351268	-0.6018	-1.6588	2.17701	6	-1.97245	0.419097
1218	llmg_1182-llmg_1182-MG390	NA	NA	NA	NA	NA	NA	0	#VALUE!	NA
1219	llmg_1183-gltB-mg5350	1.38117	-0.181919	1.72303	2.20982	1.55729	1.48063	6	3.9027	0.00922149
1220	llmg_1184-gltD-MG938	2.8509	NA	NA	NA	NA	NA	1	17.3033	NA
1221	llmg_1184-gltD-MG939	4.82277	-0.632375	2.08784	NA	1.49246	1.99095	5	7.04508	0.0883217
1222	llmg_1185-lysA-mg5345	-0.0118274	0.463585	0.230738	0.569236	0.050209	0.230719	6	1.29103	0.0397306
1223	llmg_1186-llmg_1186-MG150009	-0.00401253	0.102148	-0.158919	0.150309	-0.090721	-0.184649	6	-1.03146	0.605472
1224	llmg_1186-llmg_1186-MG150309	0.0168556	-0.166884	-0.0190354	-0.0978239	0.145501	0.289586	6	1.02843	0.696889
1225	llmg_1187-murI-MG2682	0.127871	0.101342	0.194463	0.156661	0.0899642	0.194014	6	1.15495	0.000551837
1226	llmg_1188-llmg_1188-MG2681	0.123486	-0.131567	0.386796	0.595312	0.454558	0.388575	6	1.35372	0.0367193
1227	llmg_1189-llmg_1189-MG2680	0.139449	1.00234	0.315504	0.401649	0.297185	0.357174	6	1.52026	0.0186883
1228	llmg_1190-llmg_1190-MG2679	-0.0351017	0.062574	0.0470192	0.0716261	0.260095	0.2861	6	1.12231	0.078543
1229	llmg_1191-xerD2-MG2678	-0.848486	0.0762085	0.331695	0.549426	0.416959	0.364794	6	1.16001	0.509617
1230	llmg_1192-scpA-MG2677	0.992619	-0.35052	0.356537	0.482416	0.526895	0.337232	6	1.47826	0.0786025
1231	llmg_1193-scpB-mg6092	0.576022	0.360977	0.397764	0.397451	0.607966	0.426671	6	1.58588	0.000114728
1232	llmg_1194-rluB-MG150151	-0.597359	-0.748143	-0.131675	-0.316657	-0.131133	-0.0448916	6	-1.38862	0.0371132
1233	llmg_1194-rluB-MG150151B	0.364843	0.359042	0.723445	0.69606	0.708104	0.354617	6	1.70634	0.00102942
1234	llmg_1195-llmg_1195-mg6095	-0.837323	-0.684169	0.262014	0.285451	-0.354908	-0.299376	6	-1.31178	0.214352
1235	llmg_1196-llmg_1196-mg5172	NA	-0.70996	NA	NA	8.05009	0.190988	3	12.3095	0.462109
1236	llmg_1197-llmg_1197-mg5173	-0.766216	-0.331393	0.115353	-0.503959	-0.1586	-0.383392	6	-1.40219	0.0399383
1237	llmg_1200-llmg_1200-mg5175	-0.291964	0.217508	-0.0261594	-0.0923652	-0.136818	0.00297194	6	-1.05598	0.465425
1238	llmg_1201-llmg_1201-MG150211	-0.11114	-2.93891	-0.271867	1.52051	-0.364647	0.0175494	6	-1.43059	0.569624
1239	llmg_1202-llmg_1202-mg5169	0.434195	0.189454	0.405155	0.505137	0.42153	0.63338	6	1.53953	0.000767994
1240	llmg_1203-llmg_1203-MG2808	NA	NA	NA	NA	NA	NA	0	#VALUE!	NA
1241	llmg_1203-llmg_1203-MG29	NA	0.700661	NA	0.492858	NA	-2.70109	3	-1.65289	0.692838
1242	llmg_1203-llmg_1203-mg8469	NA	0.786913	0.495989	-0.12861	0.278618	0.438175	5	1.45385	0.0673813
1243	llmg_1203-llmg_1203-mg8470	0.364729	0.890011	1.2612	0.511471	0.594737	0.939591	6	2.1389	0.00243579
1244	llmg_1204-hdiR-mg8473	0.0589794	-0.20019	0.0512934	0.0323086	0.282081	0.298273	6	1.09103	0.299681
1245	llmg_1205-llmg_1205-MG150082	0.849109	NA	NA	-2.14752	2.79156	NA	3	1.64496	0.762053
1246	llmg_1207-rplJ-MG150212	0.327042	0.194701	-0.219775	-0.125667	-0.170586	-0.229135	6	-1.03794	0.716834
1247	llmg_1208-rplL-MG150018	-0.00878315	-0.0952672	-0.259586	-0.297519	-0.572246	-0.593415	6	-1.35591	0.0267003
1248	llmg_1208-rplL-MG150019	0.0856739	0.10478	-0.174585	-0.316376	-0.584031	-0.595647	6	-1.27979	0.10852
1249	llmg_1209-rmaX-mg5102	NA	NA	0.7587	-0.0256309	0.578683	-1.17029	4	1.036	0.940389
1250	llmg_1210-llmg_1210-MG1573	-5.98791	0.0994723	-1.53855	-1.49497	0.804507	0.00500917	6	-3.86543	0.235267
1251	llmg_1211-llmg_1211-MG1574	0.631019	-0.702211	0.0806223	-0.0597106	0.136706	0.109194	6	1.03314	0.860041
1252	llmg_1214-llmg_1214-mg5867	NA	-1.17887	-0.267814	-0.0251741	-0.243822	0.542008	5	-1.26457	0.445206
1255	llmg_1215-llmg_1215-mg13011s	NA	-1.39962	-0.429157	0.238002	0.132402	-0.365669	5	-1.44024	0.277269
1253	llmg_1215-llmg_1215-MG2635	-0.806885	-0.0529481	-0.239007	0.817843	-0.44235	-0.869613	6	-1.30407	0.340745
1254	llmg_1215-llmg_1215-MG2636	0.154171	-0.312179	0.0100467	-0.0857768	-0.0989687	-0.0800994	6	-1.07122	0.319831
1256	llmg_1216-thiM-mg5862	0.513123	0.74856	0.930232	0.573285	0.0646435	0.102294	6	1.63018	0.018093
1257	llmg_1217-thiD1-mg5861	-0.0626962	1.10054	-0.0514116	2.07465	-0.0352041	0.255443	6	1.72787	0.184696
1258	llmg_1218-thiE-mg5860	0.371014	-0.521452	0.921919	-0.129355	0.037786	-0.0214197	6	1.116	0.607634
1259	llmg_1219-dltA-MG408	-0.0318825	-0.0712118	0.341324	0.568454	0.499175	0.624505	6	1.37951	0.048994
1260	llmg_1220-dltB-MG409	-0.437256	-0.766631	0.368928	0.292382	0.533302	0.488334	6	1.08312	0.734362
1261	llmg_1221-dltC-MG150310	0.494534	0.403799	0.600219	0.397915	0.483164	0.752703	6	1.68549	0.000220683
1262	llmg_1222-dltD-MG411	0.470924	0.321392	0.386097	0.451656	0.386984	0.334094	6	1.47973	1.78249e-05
1263	llmg_1223-mgtA-mg5148	0.0801178	0.302364	0.778499	0.607672	0.871294	0.841937	6	1.7866	0.00698726
1264	llmg_1223-mgtA-mg6141	-0.36107	-0.318311	-0.275413	-0.12766	0.750425	0.68215	6	1.06009	0.792906
1265	llmg_1224-llmg_1224-mg13022s	-0.392462	-0.153816	0.126852	0.256575	0.0882315	0.113672	6	1.00653	0.948903
1266	llmg_1225-metE-MG165	0.761119	1.13075	0.201685	NA	0.59307	-0.366482	5	1.59047	0.143795
1267	llmg_1226-metF-mg13024s	1.26472	NA	-1.47236	-1.38766	-2.96515	0.557077	5	-2.22704	0.352238
1268	llmg_1227	1.4375	1.50862	1.27459	1.34226	1.37618	1.33095	6	3.96834	1.73579e-07
1269	llmg_1228-llmg_1228-MG150311	1.41967	1.14859	1.44418	1.51865	1.32004	1.45358	6	3.99131	1.68287e-06
1270	llmg_1229-llmg_1229-MG150083	1.30588	1.6487	1.50931	1.54721	1.17718	1.18094	6	4.03445	1.28594e-05
1271	llmg_1230-llmg_1230-mg7637	0.714495	0.897831	1.0373	0.883997	1.24119	1.18173	6	2.69867	6.4653e-05
1272	llmg_1235-llmg_1235-MG533	0.425451	0.229086	-0.225959	-0.758982	-1.10728	-1.85488	6	-1.73111	0.179903
1273	llmg_1236-llmg_1236-MG532	-0.228882	0.562594	1.0333	-0.701369	NA	NA	4	1.18106	0.6978
1274	llmg_1237-ceo-MG531	NA	NA	-3.26532	-1.73397	-0.15652	0.432009	4	-3.25747	0.250728
1275	llmg_1238-cspD2-MG150084	-0.207124	-0.370103	0.0350043	-0.0270707	-0.228085	-0.262783	6	-1.19327	0.0359676
1276	llmg_1240-llmg_1240-mg6608	0.0297756	0.014612	-0.829677	0.401937	0.467174	0.000618695	6	1.01417	0.943436
1277	llmg_1241-llmg_1241-MG1503	NA	0.783697	-0.120115	-0.421879	-0.491909	0.147075	5	-1.02084	0.93317
1278	llmg_1242-llmg_1242-MG150312	-3.87494	0.337733	0.722048	-0.375151	0.181137	-0.323276	6	-1.74265	0.454335
1279	llmg_1243-llmg_1243-MG150085	0.211862	NA	1.99426	NA	0.0111343	0.877964	4	2.168	0.18187
1280	llmg_1243-llmg_1243-MG1505	0.649042	0.254458	NA	0.881556	NA	NA	3	1.81306	0.0830102
1281	llmg_1244-llmg_1244-MG1507	1.96266	NA	NA	NA	-0.208064	NA	2	2.40439	NA
1282	llmg_1245-llmg_1245-MG1508	NA	-3.79641	-0.47937	0.271258	NA	NA	3	-3.79939	0.397311
1283	llmg_1247-arsD-mg6615	-0.738243	NA	NA	NA	NA	0.144638	2	-1.34555	NA
1284	llmg_1248-arsA-MG150086	0.527747	NA	0.628019	-0.179614	0.65358	NA	4	1.50295	0.131199
1285	llmg_1248-arsA-MG1511	-0.163544	0.291011	NA	-1.49302	0.406634	NA	4	-1.27091	0.620341
1286	llmg_1249-llmg_1249-MG1512	-0.358956	NA	-0.743344	-0.169131	0.643671	-0.301451	5	-1.20423	0.461331
1287	llmg_1250-llmg_1250-MG1513	0.562418	0.0757447	1.35367	0.811075	NA	-2.45139	5	1.07283	0.920681
1288	llmg_1251	0.672308	0.69663	-0.00605007	-0.217374	0.366077	0.217883	6	1.33409	0.111158
1289	llmg_1252	0.347038	-1.13524	0.641995	0.00152612	-0.192375	NA	5	-1.06974	0.834815
1290	llmg_1253-llmg_1253-MG1884	-0.715768	0.210415	-0.238246	0.127315	-0.0261964	0.379776	6	-1.04476	0.794646
1291	llmg_1254-llmg_1254-MG150087	-0.20047	1.16274	-0.477192	-0.00715786	1.00161	NA	5	1.34434	0.421292
1292	llmg_1254-llmg_1254-MG150087B	0.830429	NA	-0.10313	-0.733654	-0.287783	0.019225	5	-1.05652	0.8402
1293	llmg_1255-cspC-MG150313	-0.214232	0.301248	-0.289539	-0.281796	-0.409093	-1.07869	6	-1.38914	0.129051
1294	llmg_1256-cspD-MG150088	-0.611687	-0.617829	0.00688816	0.039437	-0.303718	-0.238278	6	-1.33313	0.0573565
1295	llmg_1257-llmg_1257-MG150314	-0.247199	-0.389922	-0.0998072	-0.156745	-0.342822	-0.282477	6	-1.28809	0.00243123
1296	llmg_1258-llmg_1258-MG1889	-0.939143	-0.209881	-0.264273	-0.289533	0.143227	-0.0644119	6	-1.31084	0.128699
1297	llmg_1259-llmg_1259-MG150089	-0.427865	-0.40572	-0.206851	-0.228427	-0.189841	-0.227625	6	-1.32453	0.00131057
1298	llmg_1260-llmg_1260-MG150315	0.512341	0.496835	0.081659	0.592829	-0.136794	0.367569	6	1.37585	0.0413822
1299	llmg_1260-llmg_1260-MG150315B	0.231851	-0.152363	-0.192219	-0.214225	-0.132176	-0.11379	6	-1.10019	0.214651
1300	llmg_1263-llmg_1263-mg5100	NA	-1.18141	1.0602	0.41944	-0.0767118	-0.819496	5	-1.12704	0.783133
1301	llmg_1268-llmg_1268-mg5830	-0.315158	-1.53697	-0.0777841	-0.15274	-0.288588	-0.189217	6	-1.53226	0.11624
1302	llmg_1269-llmg_1269-MG150316	0.251993	0.104416	-0.169449	-0.0969544	-0.141697	-0.287012	6	-1.05807	0.515918
1303	llmg_1270-llmg_1270-MG1054	-0.747114	0.552609	-0.117117	0.289516	-0.284774	-0.25125	6	-1.09749	0.64065
1304	llmg_1271-gidC-mg13107s	0.275373	0.0808319	-0.593405	-0.607707	-0.437122	-0.301047	6	-1.30193	0.137229
1305	llmg_1271-gidC-mg8316	-0.391795	-0.430453	-0.412327	-0.285633	-0.564553	-0.756494	6	-1.60567	0.000896131
1306	llmg_1272-topA-mg8315	-0.422835	-0.804727	-0.31636	-0.23324	-0.389669	-0.372626	6	-1.5269	0.00339199
1307	llmg_1273-smf-mg8313	NA	-0.332298	-0.329144	NA	-0.0794804	NA	3	-1.28015	0.0983279
1308	llmg_1274-aldR-mg8312	0.431633	0.147317	0.600239	0.382756	-0.187762	-0.174532	6	1.22133	0.196567
1309	llmg_1275-aldB-MG2512	0.00699659	-0.263861	0.134182	0.179237	-0.303229	-0.141659	6	-1.06686	0.470813
1310	llmg_1276-ilvA-MG2510	-0.299271	0.651148	-1.76771	-0.23972	-0.0363139	NA	5	-1.40266	0.440211
1311	llmg_1277-ilvC-MG2509	0.804266	0.546603	0.876893	6.92802	0.8842	0.883592	6	6.17554	0.135211
1312	llmg_1278-ilvN-MG2508	0.495032	-1.13851	0.648039	1.98554	1.45874	0.509356	6	1.93421	0.189922
1313	llmg_1279-ilvB-MG2507	0.786646	1.56974	0.625607	1.36114	0.741402	1.12085	6	2.81294	0.00112186
1314	llmg_1280-ilvD-MG2506	0.436568	NA	NA	0.091176	0.848367	1.38488	4	1.99421	0.0893934
1315	llmg_1281-llmg_1281-MG2505	NA	0.90135	0.918699	-0.829538	-1.66934	0.665617	5	-1.00265	0.996246
1316	llmg_1282-leuD-MG2504	1.80235	NA	NA	NA	NA	NA	1	6.06385	NA
1317	llmg_1283-llmg_1283-MG2503	NA	NA	-0.890313	NA	NA	NA	1	-2.43589	NA
1318	llmg_1284-leuC-MG2501	NA	1.3144	NA	0.575159	0.936229	-0.0614915	4	1.99586	0.0993429
1319	llmg_1287-llmg_1287-mg8488	-0.385036	-0.42044	-0.444886	-0.514503	-0.620534	-0.613779	6	-1.6485	6.51292e-05
1320	llmg_1288-hisK-MG150090	NA	-1.52742	2.23756	0.632248	-1.53614	0.102258	5	-1.01847	0.980698
1321	llmg_1288-hisK-mg8492	-1.19061	-0.553987	0.498459	0.183875	-0.122197	0.529972	6	-1.11525	0.705681
1322	llmg_1289-hisI-MG2117	0.781654	0.20609	0.52457	0.429207	0.369384	0.400985	6	1.57142	0.00220474
1323	llmg_1290-hisF-MG2116	0.238852	0.439149	0.3953	0.344272	-1.05377	-0.0742696	6	1.04944	0.844007
1324	llmg_1291-hisA-MG150175	0.297884	0.493483	0.559287	0.545455	0.697769	0.629708	6	1.71132	0.000208462
1325	llmg_1292-hisH-mg6515	0.0557809	-0.56533	0.576215	0.695095	0.71584	0.78436	6	1.45789	0.142856
1326	llmg_1293-llmg_1293-MG1045	-0.339723	0.638087	0.392202	0.51417	0.722588	0.760365	6	1.5651	0.0437345
1327	llmg_1294-hisB-MG1046	1.46212	1.65179	0.909947	0.53684	0.335686	0.369889	6	2.40539	0.0127688
1328	llmg_1295-hisD-MG1047	0.867198	0.0192153	0.272617	NA	0.288322	0.365506	5	1.43702	0.0594622
1329	llmg_1296-hisG-MG1048	-1.55887	0.0877749	0.500364	1.46768	0.775617	0.707095	6	1.39089	0.467634
1330	llmg_1297-hisZ-MG1050	-0.201475	0.544602	0.0309669	0.498497	1.17553	0.673041	6	1.57385	0.0715688
1331	llmg_1298-hisC-MG1051	0.0231063	0.848397	NA	-0.882982	-0.406021	0.778305	5	1.07483	0.83999
1332	llmg_1299-llmg_1299-MG1052	0.49665	NA	-0.212859	-0.302767	-1.12261	-0.0843185	5	-1.27785	0.398825
1333	llmg_1300	-0.339841	-0.188002	-0.26827	-0.113978	0.0129545	0.0590408	6	-1.14991	0.0804031
1334	llmg_1301-llmg_1301-MG150152	-0.137578	-0.56002	-0.156603	-0.119393	-0.125276	0.00287216	6	-1.20041	0.0685038
1335	llmg_1302	-0.219619	-0.43822	-0.175548	-0.255534	-0.137649	0.109856	6	-1.20457	0.0511372
1336	llmg_1303-llmg_1303-mg13055s	-0.302137	0.09103	-0.151392	-0.31127	-0.0824531	-0.0519084	6	-1.14418	0.0864749
1337	llmg_1304-vacB2-mg5101	0.825978	0.270173	0.108886	0.357793	0.230568	0.197171	6	1.39342	0.024568
1338	llmg_1304-vacB2-mg5306	-0.127875	NA	0.677602	NA	-1.59844	0.347982	4	-1.19146	0.750357
1339	llmg_1305-llmg_1305-mg13050s	NA	0.605514	-2.54051	0.0160163	2.43069	NA	4	1.13647	0.908772
1340	llmg_1306-llmg_1306-MG150091	-0.466901	NA	NA	-0.0716629	NA	NA	2	-1.30902	NA
1341	llmg_1306-llmg_1306-MG150091B	-0.965948	-0.381087	NA	-0.0152843	0.132948	-0.0406738	5	-1.28918	0.266525
1342	llmg_1306-llmg_1306-MG150153	NA	-1.47464	0.0119308	-0.260964	-0.0965715	-0.426979	5	-1.56744	0.167447
1343	llmg_1306-llmg_1306-MG150153B	1.21132	1.68932	0.271702	NA	-0.152763	NA	4	2.12739	0.171715
1344	llmg_1306-llmg_1306-mg7717	-0.14538	0.253018	-0.0245944	-0.0212627	0.194572	0.0456114	6	1.05162	0.445608
1345	llmg_1308-llmg_1308-MG150093	0.113421	0.67467	NA	NA	NA	NA	2	1.48297	NA
1346	llmg_1309-als-MG552	-0.822135	-1.10609	-0.51455	-0.571987	-0.396707	-0.343296	6	-1.86973	0.00316787
1347	llmg_1310-llmg_1310-mg7723	-0.827765	-0.371915	-0.0571064	0.0565541	-0.169471	-0.165883	6	-1.29166	0.102457
1348	llmg_1311-llmg_1311-MG787	-0.0922412	-0.248586	NA	-0.0319777	-0.0449022	-0.284613	5	-1.15081	0.0562874
1349	llmg_1313-llmg_1313-MG789	-0.638491	-0.198837	-0.0844949	-0.183881	0.130127	0.0758102	6	-1.16179	0.238014
1350	llmg_1314-llmg_1314-MG1428	-0.406113	-0.742095	-0.217029	-0.0813712	-0.225538	0.6486	6	-1.18601	0.407029
1351	llmg_1315-llmg_1315-MG1429	-1.54578	-0.0713252	-0.113556	-0.0712598	-0.106312	-0.260195	6	-1.43534	0.19027
1352	llmg_1316-llmg_1316-mg7732	0.130626	0.323677	0.0225745	0.213091	0.407575	0.123466	6	1.22569	0.0170335
1353	llmg_1317-llmg_1317-mg7733	-0.0754614	-0.287259	-0.439707	-0.597903	-0.17281	-0.213028	6	-1.34675	0.0124207
1354	llmg_1318-llmg_1318-mg7734	NA	NA	1.50477	NA	NA	-0.849166	2	1.38792	NA
1355	llmg_1320-llmg_1320-MG150154	-0.168878	-0.00931557	-0.0742252	0.021248	-0.120835	-0.147589	6	-1.08683	0.0447758
1356	llmg_1320-llmg_1320-MG150154B	0.145094	0.20432	0.131661	0.145376	0.335091	0.346008	6	1.24349	0.00287266
1357	llmg_1320-llmg_1320-mg5503	0.034101	-0.0214002	-0.141213	0.127695	0.161177	-0.0416678	6	1.01998	0.684498
1358	llmg_1321-llmg_1321-MG833	NA	NA	NA	NA	0.140174	-0.0478152	2	1.04726	NA
1359	llmg_1322-llmg_1322-MG2189	NA	NA	0.290803	-2.35075	-0.0921203	-1.78482	4	-2.67573	0.222221
1360	llmg_1324-llmg_1324-MG11	NA	-5.10227	3.33926	NA	NA	-0.198468	3	-1.92288	0.814384
1361	llmg_1325-potD-MG10	0.46853	0.610797	0.921115	0.428511	0.460523	0.445663	6	1.74343	0.000833416
1362	llmg_1326-potC-MG9	-0.0568384	0.104416	0.152741	NA	0.457982	0.700247	5	1.31221	0.115864
1363	llmg_1327-potB-MG8	0.706365	-0.662484	0.507606	0.853442	0.346778	0.438801	6	1.44064	0.156159
1364	llmg_1327-potB-mg8318	NA	3.01106	NA	NA	7.58745	NA	2	200.187	NA
1365	llmg_1328-potA-MG1062	0.488712	0.202572	0.370466	0.190307	0.396611	0.222394	6	1.36594	0.00162774
1366	llmg_1329-murB-MG1061	-0.290481	-0.0861044	-0.311033	-0.0100766	-0.482297	-0.3105	6	-1.28199	0.0164919
1367	llmg_1330-llmg_1330-MG1059	-0.0424715	-0.00774224	-0.068699	-0.0776992	-0.064256	-0.0456966	6	-1.05242	0.00422087
1368	llmg_1331-thrB-MG1058	-0.244689	0.578574	0.223803	0.22753	0.664105	-0.197803	6	1.23194	0.23474
1369	llmg_1332-hom-MG1057	0.33808	0.224723	0.747232	0.441769	0.515237	0.495119	6	1.58464	0.00142342
1370	llmg_1333-dukB-MG1680	0.515466	0.330007	0.0483049	0.335642	0.0528734	0.0388482	6	1.24631	0.0439905
1371	llmg_1334-folC-MG1679	0.48225	0.437672	0.299609	0.433652	0.387575	0.402592	6	1.50264	1.69503e-05
1372	llmg_1334-folC-mg6243	-0.00253345	0.158389	0.419161	0.270167	0.490795	0.293116	6	1.31195	0.0134542
1373	llmg_1335-llmg_1335-MG1678	NA	-1.53917	0.36941	-0.209076	0.31293	0.219516	5	-1.18445	0.660292
1374	llmg_1336-folP-MG1677	0.330238	0.178757	0.309591	0.375795	0.324866	0.398509	6	1.37661	0.000155502
1375	llmg_1337-folE-MG1675	-0.00991137	0.0887211	0.231097	0.158162	0.425256	0.322182	6	1.22456	0.0256362
1376	llmg_1338-folB-mg6237	-0.214398	-0.0189101	0.520262	0.322506	0.47682	0.391353	6	1.27925	0.0969867
1377	llmg_1339-engB-MG543	0.0836931	-0.31139	0.197952	-0.210159	0.158952	-0.000164297	6	-1.01361	0.878383
1378	llmg_1340-clpX-MG542	-0.495935	-0.234943	0.160434	-0.100151	0.230474	0.24754	6	-1.03262	0.802682
1379	llmg_1342-dfrA-mg6232	0.171571	-0.397863	-0.00622292	0.0513036	0.128845	0.205781	6	1.0259	0.788742
1380	llmg_1343-spoU-MG150176	-0.428341	-0.604406	-0.262129	-0.176746	-0.0392582	-0.388324	6	-1.37236	0.0116698
1381	llmg_1344	NA	NA	-0.49812	NA	-0.283425	0.806466	3	1.00834	0.985457
1382	llmg_1344-llmg_1344-MG150094	1.45703	-0.395376	0.820738	0.190382	0.344652	-0.177276	6	1.4526	0.235642
1383	llmg_1344-llmg_1344-MG150094B	0.945876	NA	0.0120042	0.710063	NA	NA	3	1.74365	0.185841
1384	llmg_1345	0.214988	0.864205	1.0137	0.560044	0.0905105	0.239091	6	1.64393	0.0235906
1385	llmg_1345-pbuX-MG150155	0.520043	0.699773	0.79647	0.74356	1.04775	1.20037	6	2.30403	0.000423374
1386	llmg_1346-xpt-MG150177	0.303535	0.325217	0.804474	0.842369	1.08541	0.874125	6	2.02558	0.00287867
1387	llmg_1349-orf57-mg8483	0.0368167	0.436833	0.522431	0.383699	0.26076	0.446183	6	1.41593	0.00463619
1388	llmg_1350-telC-MG1362	0.321276	0.251954	0.377062	0.369268	0.252917	0.342786	6	1.37604	3.20612e-05
1389	llmg_1351-telB-MG1361	-0.123354	0.148505	0.507355	0.38444	0.429248	0.406237	6	1.3392	0.0292932
1390	llmg_1352-telA-MG1360	0.0321662	0.0706183	0.325905	0.323322	0.392982	0.427496	6	1.29963	0.0124807
1391	llmg_1353-orf53-MG1359	0.360603	0.146807	0.384802	0.549424	0.515956	0.602222	6	1.53209	0.00150002
1392	llmg_1354-orf52-MG1358	-0.0630191	0.690615	0.274118	0.301394	0.367784	0.460356	6	1.4029	0.0203355
1393	llmg_1355-orf51-MG1357	0.412936	-0.188317	0.200308	0.385904	0.317487	0.414576	6	1.29324	0.0424851
1394	llmg_1356-orf50-MG1356	-0.0172454	0.0297387	0.0311595	0.0421736	0.295841	0.217213	6	1.10496	0.109114
1395	llmg_1357-orf49-MG1355	0.098194	-0.404009	-0.0675391	-0.170569	0.177043	0.242062	6	-1.02102	0.841815
1396	llmg_1358-orf48-MG961	-0.261723	-0.180137	-0.150507	-0.209524	0.164441	0.14102	6	-1.08626	0.326065
1397	llmg_1359-orf47-MG150021	-0.901713	-0.961299	-0.825048	-0.807169	-0.736971	-0.58898	6	-2.23341	2.34259e-05
1398	llmg_1360-orf46-mg8484	-0.945503	-0.868829	-0.80951	-0.917108	-0.250582	-0.34763	6	-1.99344	0.00273347
1399	llmg_1361-orf45-mg6624	-0.599314	0.134192	NA	-1.04566	-0.288341	-0.237254	5	-1.50272	0.108273
1400	llmg_1362-orf44-MG150095	-2.25533	-0.271643	-0.144073	-0.101277	0.144005	0.122005	6	-1.51849	0.313971
1401	llmg_1364-orf43-MG1732	NA	-1.68601	-0.505664	0.469611	0.37837	0.106454	5	-1.28075	0.567751
1402	llmg_1365-orf42-MG1731	-0.75427	NA	0.121228	-0.282531	0.202233	0.0109478	5	-1.15082	0.464829
1403	llmg_1366-orf41-mg7149	0.358487	0.070415	0.334785	0.181043	0.391832	0.331219	6	1.32044	0.00282183
1404	llmg_1369-orf38-mg7146	-0.0236151	-0.534653	-0.0671318	0.0903302	0.184743	0.0944235	6	-1.04357	0.701593
1405	llmg_1370-ltrB-MG1797	-0.282673	0.117145	-0.178907	-0.0325898	-0.499542	-0.376134	6	-1.23218	0.0734082
1406	llmg_1371-matR-MG1795	-1.028	-1.43379	-0.515999	-0.529723	-1.07827	-0.595325	6	-2.37149	0.00242503
1407	llmg_1371-matR-MG1796	-0.39971	0.0590135	-0.692521	-0.552025	-0.760621	-0.720708	6	-1.66712	0.00984408
1408	llmg_1372-rlx-MG1794	-0.940058	0.687624	-0.315244	-0.573128	-0.331317	-0.651288	6	-1.42462	0.182169
1409	llmg_1373-orf34-MG150317	1.67715	1.4001	NA	NA	-1.39233	-1.14934	4	1.14327	0.879876
1410	llmg_1374-ltrE-MG1792	-0.559273	-0.580509	0.0511037	0.0219984	-0.23357	-0.222229	6	-1.28884	0.071239
1411	llmg_1375-ltrD-MG1791	-1.53119	-0.368688	0.337262	-0.231163	-0.222722	-0.402272	6	-1.4965	0.168605
1412	llmg_1376-ltrC-MG1790	-0.233289	0.259706	-0.324854	-0.398984	-0.510887	-0.447683	6	-1.31785	0.0602898
1413	llmg_1377-orf30-MG1788	0.463018	0.221629	-0.453692	-0.615029	-0.665011	-0.413632	6	-1.27607	0.259771
1414	llmg_1378-orf29-MG1787	NA	-0.483168	-0.017275	NA	-0.369217	-0.406656	4	-1.37586	0.0538346
1415	llmg_1379-orf28-MG1786	NA	2.42833	NA	NA	NA	4.16487	2	27.0206	NA
1416	llmg_1379-orf28-mg7135	-0.0218506	-0.42269	-0.354866	-0.151853	-0.312026	-0.296897	6	-1.29697	0.00746464
1417	llmg_1381-orf27-MG150097	NA	NA	NA	-1.33559	0.678088	-2.0054	3	-2.42937	0.385778
1418	llmg_1381-orf27-MG150098	-0.174602	0.270453	0.0133098	0.258604	-0.341504	-0.264471	6	-1.0405	0.727428
1419	llmg_1381-orf27-MG150098B	0.198436	0.100905	-0.143452	0.0895451	-0.368345	-0.198636	6	-1.05505	0.572108
1420	llmg_1382-orf26-MG1783	1.06181	3.96619	NA	NA	0.466347	0.177598	4	4.12879	0.201279
1421	llmg_1382-orf26-mg7132	-0.281575	-0.552797	-0.46818	-0.447551	-0.30454	-0.266087	6	-1.47225	0.000495408
1422	llmg_1383-traD-MG1781	-0.23875	0.389742	-0.804162	0.391352	-0.182471	-0.0524506	6	-1.08631	0.669775
1423	llmg_1384-orf24-MG1780	-0.722679	-0.22171	-0.255566	-0.350661	-0.730402	-0.700754	6	-1.64372	0.00428585
1424	llmg_1385	-0.2143	-0.107777	-0.0925371	-0.0765917	-0.61872	-0.275957	6	-1.25983	0.0400555
1425	llmg_1386-orf22-MG1778	-0.286827	NA	-1.33727	NA	NA	0.820932	3	-1.30699	0.7093
1426	llmg_1386-orf22-mg7129	-0.289725	-0.219237	-0.384781	-0.402926	-0.371909	-0.495368	6	-1.43427	0.000248999
1427	llmg_1387-orf21-MG150318	-0.404057	-0.310162	-0.077289	0.104107	-0.295626	-0.18143	6	-1.21419	0.0498131
1428	llmg_1387-orf21-MG150318B	0.195147	-0.0300886	-0.354818	-0.386964	-0.448145	-0.18536	6	-1.22349	0.102183
1429	llmg_1388-orf20-MG1776	-0.315703	0.0166165	-0.0645303	-0.220714	-0.449488	-0.576487	6	-1.30785	0.0333638
1430	llmg_1389-orf19-MG150319	0.890271	0.805872	2.36708	1.26344	-0.254557	-0.241154	6	2.23705	0.102275
1431	llmg_1390-orf18-MG1774	NA	NA	NA	NA	NA	NA	0	#VALUE!	NA
1432	llmg_1390-orf18-mg7123	-0.502413	0.116823	-0.364135	-0.266189	-0.522757	-0.432927	6	-1.38902	0.019522
1433	llmg_1390-orf18-mg7124	0.381858	0.529526	-0.272566	-0.178307	-0.460718	-0.409787	6	-1.07072	0.707079
1434	llmg_1391-llmg_1391-MG1063	NA	-1.85608	NA	NA	NA	NA	1	-6.39861	NA
1435	llmg_1391-llmg_1391-mg7122	0.107146	-0.0735714	-0.243466	-0.288391	NA	-0.44613	5	-1.2079	0.117307
1436	llmg_1392-orf16-mg7121	0.230466	-0.348415	-0.233416	-0.215277	-0.164823	0.192081	6	-1.09406	0.403159
1437	llmg_1393-orf15-MG150320	-3.1255	0.467545	-0.845757	-0.815261	0.0229489	0.1938	6	-1.9812	0.257716
1438	llmg_1393-orf15-mg7120	0.516552	-0.366653	-0.345295	0.00114892	-0.199471	-0.157762	6	-1.09627	0.52171
1439	llmg_1395-orf14-mg7117	0.374454	NA	-0.350541	-1.29976	0.400127	0.0862417	5	-1.17104	0.6434
1440	llmg_1396	-2.30634	-1.01847	0.568353	0.492851	-0.787508	-0.342564	6	-1.76053	0.252519
1441	llmg_1398-cluA-MG70	-0.484635	-2.64525	0.0486141	0.00961429	-1.68073	-0.228267	6	-2.29357	0.122014
1442	llmg_1399-orf10-MG68	-0.823594	-0.0477704	-0.322289	-0.312104	-0.139026	-0.366544	6	-1.39825	0.0282762
1443	llmg_1399-orf10-MG69	-0.774527	0.294365	-4.40379	-0.354329	-0.301005	-1.31068	6	-3.13197	0.157853
1444	llmg_1400-orf9-MG67	NA	-0.889396	NA	NA	NA	NA	1	-2.43366	NA
1445	llmg_1402-orf8-MG150322	0.512563	-0.307791	0.35278	-0.291356	0.0952953	-0.0288102	6	1.05701	0.701217
1446	llmg_1403-orf7-MG65	NA	NA	-1.30464	NA	-0.662405	-1.70854	3	-3.40483	0.056609
1447	llmg_1406-orf6-MG150324	-1.7868	0.721221	-1.37049	1.66202	-0.502691	-1.16503	6	-1.50225	0.490194
1448	llmg_1407-orf5-MG150100	-0.370496	0.097229	-0.395578	-0.305934	-0.0034852	-0.213259	6	-1.21968	0.0617403
1449	llmg_1408-orf4-MG150101	-0.415167	0.0794915	0.031555	-0.164871	3.04102	-0.44293	6	1.42597	0.54338
1450	llmg_1409-orf3-MG1165	-4.23039	-0.137215	-0.265913	-0.464981	-0.0635262	-0.252383	6	-2.46552	0.234595
1451	llmg_1410-orf2-MG1166	-0.52879	0.0584039	0.165625	-1.09658	0.499357	0.243286	6	-1.11604	0.668418
1452	llmg_1411-orf1-MG1168	0.26994	6.05646	NA	NA	-1.94149	-2.85237	4	1.46687	0.860417
1453	llmg_1412-guaC-MG1169	NA	NA	-1.04497	-2.09853	-1.16886	-1.27494	4	-4.04235	0.00993325
1454	llmg_1413-llmg_1413-MG1170	-0.0809647	0.268322	-0.330445	-0.1106	-0.283873	-0.266453	6	-1.1434	0.197317
1455	llmg_1414-nagD-MG1171	-0.168353	-0.123876	-0.300692	-0.320582	0.153145	0.168628	6	-1.10365	0.311544
1456	llmg_1415-llmg_1415-MG1172	0.173091	1.02594	NA	-0.436861	-0.0846598	0.326085	5	1.22228	0.456005
1457	llmg_1416-llmg_1416-MG1173	-0.651048	0.582843	0.4071	-0.757297	-0.355984	-0.145443	6	-1.16568	0.524729
1458	llmg_1417-llmg_1417-MG1174	-0.059588	-0.440932	-0.232877	-0.184561	-0.132408	-0.30559	6	-1.25357	0.00927274
1459	llmg_1418-hemN-mg7089	0.155347	0.44211	0.506757	0.0588656	0.0554263	0.294448	6	1.2868	0.0244216
1460	llmg_1419-llmg_1419-MG978	NA	0.514288	-0.571401	-0.0906885	-0.156813	-0.667608	5	-1.21464	0.406519
1461	llmg_1420-llmg_1420-MG976	1.94567	NA	NA	NA	NA	-0.510534	2	2.04944	NA
1462	llmg_1421-llmg_1421-MG974	NA	-3.20261	0.0400697	0.376723	-0.318937	-0.0969273	5	-1.89712	0.380616
1463	llmg_1422-pacA-MG1353	-0.465369	-0.162488	-0.521538	-0.465716	-0.143377	-0.333614	6	-1.4172	0.00343086
1464	llmg_1424-tpiA-mg7080	0.0561569	0.220127	-0.137362	-0.0493651	-0.225621	-0.28072	6	-1.07193	0.403134
1465	llmg_1425-llmg_1425-MG1349	-0.731297	-0.0986265	-0.037694	-0.137436	-0.0463757	0.000844086	6	-1.19136	0.181921
1466	llmg_1426-llmg_1426-MG1348	-0.330269	-0.351348	-0.297769	-0.243594	-0.315062	-0.500243	6	-1.40455	0.000208285
1467	llmg_1427-llmg_1427-mg7077	2.13046	0.715366	NA	-1.14341	NA	0.323145	4	1.65929	0.506501
1468	llmg_1428-llmg_1428-MG150156	0.110158	0.145425	-0.170878	-0.132361	-0.115737	-0.125045	6	-1.04925	0.432344
1469	llmg_1429-ldhX-MG193	-0.596808	-0.769091	-0.616656	-0.404602	-0.238529	-0.330265	6	-1.63666	0.00182748
1470	llmg_1430-ribC-MG195	-0.0316064	0.342399	0.139831	-0.0513967	-0.375535	0.0367995	6	1.01013	0.92125
1471	llmg_1431-truB-MG196	-0.36038	-0.662328	-0.60476	-0.357401	-0.116958	-0.289437	6	-1.48965	0.00486529
1472	llmg_1432-llmg_1432-mg7821	-0.119247	-0.251419	-0.323136	-0.097667	0.112204	-0.0131985	6	-1.12233	0.132875
1473	llmg_1433-llmg_1433-MG502	NA	-0.980809	-0.0213343	0.216453	-0.422296	-0.579568	5	-1.42977	0.164342
1474	llmg_1434-llmg_1434-MG504	-3.539	NA	0.318246	NA	2.37996	0.401462	4	-1.11609	0.934916
1475	llmg_1435-llmg_1435-MG505	0.0953806	-0.517885	-0.0575605	-0.419492	-0.0108475	0.300194	6	-1.10705	0.459981
1476	llmg_1440-llmg_1440-MG2277	-0.392777	-0.628764	-0.203724	-0.140727	0.0970088	0.0224923	6	-1.2309	0.11713
1477	llmg_1441-frdC-MG2276	0.151032	-0.203771	-0.0880075	-0.179506	-0.211638	-0.296259	6	-1.148	0.0832408
1478	llmg_1442-llmg_1442-MG150215	0.111625	-0.0744277	0.165108	0.229995	-0.184198	-0.15499	6	1.01564	0.837424
1479	llmg_1444-mutX-MG1522	0.332396	0.411529	0.367829	0.352954	0.453013	0.474071	6	1.48979	1.23938e-05
1480	llmg_1445-pcrA-mg6261	-0.125521	-0.118914	0.0124842	-0.0618035	0.192739	0.136995	6	1.00601	0.916882
1481	llmg_1446-llmg_1446-MG1716	-0.164406	-0.275672	0.11155	-0.0615214	-0.0557433	-0.0913067	6	-1.09365	0.148761
1482	llmg_1447-llmg_1447-MG1717	-1.57964	-0.712274	0.149848	-0.0466698	-0.249874	-0.0842619	6	-1.52269	0.167433
1483	llmg_1448-llmg_1448-MG1719	-0.249866	-0.00474719	-0.310163	0.0637371	-0.070352	-0.152037	6	-1.12814	0.0953806
1484	llmg_1449-srtA-MG150178	0.0300528	-0.143957	-0.08223	-0.00126344	-0.06988	-0.0576498	6	-1.05565	0.0840479
1485	llmg_1450-apbE-mg5696	0.479766	-2.71325	0.200956	0.160126	0.327396	0.486691	6	-1.1929	0.743721
1486	llmg_1451-gyrA-mg5695	-0.0771824	0.0477509	-0.128916	-0.148388	-0.147238	-0.139545	6	-1.10398	0.0249726
1487	llmg_1452-llmg_1452-mg5694	0.329705	0.286689	0.152398	0.121439	-0.459028	-0.197	6	1.03981	0.767556
1488	llmg_1453-llmg_1453-MG150179	-0.281174	-0.173114	0.322066	0.236935	-0.0575999	-0.139876	6	-1.01558	0.881271
1489	llmg_1454-llmg_1454-mg6115	0.447115	0.399845	-0.18864	-0.212973	0.213394	0.143362	6	1.14303	0.299046
1491	llmg_1455-bglA2-mg6114	0.283927	NA	-0.0134125	-0.564211	0.128856	0.644959	5	1.10079	0.653366
1490	llmg_1455-bglA2-MG809	NA	-2.12006	NA	-0.894446	0.977814	-1.11731	4	-2.20009	0.309608
1492	llmg_1456-bglX-MG810	1.49292	NA	NA	NA	NA	NA	1	4.45006	NA
1493	llmg_1457-llmg_1457-mg6110	NA	1.46521	0.871575	NA	-0.413255	2.38402	4	2.93552	0.163461
1494	llmg_1458-llmg_1458-MG1472	NA	NA	NA	NA	-2.72571	0.897969	2	-2.49395	NA
1495	llmg_1458-llmg_1458-mg6109	NA	0.904239	NA	NA	-0.130096	NA	2	1.47266	NA
1496	llmg_1459-llmg_1459-MG1473	-3.55964	-0.212244	-0.351179	0.0628203	-0.0312708	-0.0359826	6	-1.98956	0.287057
1497	llmg_1460-llmg_1460-MG1474	1.0946	0.96652	0.633354	-0.964804	-0.609255	-0.423625	6	1.12314	0.76141
1498	llmg_1461-llmg_1461-MG1436	-1.70758	0.0762172	NA	-0.531963	-0.639376	0.320631	5	-1.64282	0.231744
1499	llmg_1461-llmg_1461-MG150157	0.62118	0.535692	-0.209588	-0.0540363	-0.2789	0.0224089	6	1.11196	0.526619
1500	llmg_1462-llmg_1462-MG1437	0.922994	NA	NA	NA	-3.19848	NA	2	-3.11973	NA
1501	llmg_1463-lepA-MG1438	0.267505	1.00905	-0.00667802	-0.285535	-0.28979	-0.175063	6	1.09044	0.688025
1502	llmg_1463-lepA-mg5664	-0.00698922	0.0162118	-0.182317	-0.208238	-0.621943	-0.140563	6	-1.21002	0.0985163
1503	llmg_1464-aldC-MG1439	-0.709868	-0.895145	-0.260078	-0.238836	-0.381621	-0.634721	6	-1.6821	0.00498866
1504	llmg_1465-murC2-MG1440	-0.755193	-0.504334	-0.0441926	0.153607	-0.112991	-0.15754	6	-1.26715	0.141172
1505	llmg_1466-cobQ-mg5659	0.0262716	-0.0239021	-0.0285613	-0.0339739	-0.144012	-0.0730361	6	-1.04729	0.105893
1506	llmg_1467-llmg_1467-mg5802	1.1287	NA	-0.743073	2.92779	-1.40153	-1.36338	5	1.11595	0.902566
1507	llmg_1467-llmg_1467-mg7751	-3.03569	0.221238	0.434545	1.58031	-0.193997	0.279527	6	-1.12638	0.858033
1508	llmg_1468-llmg_1468-MG415	NA	NA	NA	0.310739	-0.376948	-0.319212	3	-1.13709	0.618682
1509	llmg_1470-nadE-MG417	-0.394686	-0.419161	-0.0204035	0.0454923	-0.250752	-0.272574	6	-1.24443	0.0384109
1510	llmg_1471-llmg_1471-MG418	0.0786863	-0.306083	-0.448936	0.18148	-0.0988379	0.0977354	6	-1.08617	0.454928
1511	llmg_1472-pncB-MG419	0.208982	0.184563	0.18834	0.263212	-0.0948323	0.0359546	6	1.14001	0.0619498
1512	llmg_1472-pncB-MG420	-2.0882	-2.83	-0.281093	0.831173	0.1817	0.01147	6	-2.00537	0.287678
1513	llmg_1473-nadD2-MG421	0.0658744	0.00465587	-0.151425	-0.181609	-0.0147309	-0.102335	6	-1.06531	0.170686
1514	llmg_1474-llmg_1474-MG422	0.638932	-0.008349	-0.0838633	2.07333	0.123253	-0.197279	6	1.52858	0.280256
1515	llmg_1475-llmg_1475-MG150325	0.186878	0.901683	-0.335597	-0.590764	-0.469239	0.583359	6	1.04713	0.860435
1516	llmg_1477-glyS-MG425	-0.313657	-0.518406	0.0324362	0.109983	0.0779042	0.147856	6	-1.08038	0.518608
1517	llmg_1477-glyS-mg8449	0.456117	0.421851	-0.0817787	0.104612	0.185191	0.275076	6	1.25463	0.0405395
1518	llmg_1478-glyQ-MG2521	0.253175	0.212076	0.158374	0.196227	0.0911435	0.123493	6	1.18817	0.000877523
1519	llmg_1479-nucA-MG2522	-1.10989	-0.175262	0.166005	-0.184829	0.0203243	0.0283475	6	-1.23271	0.316914
1520	llmg_1480-llmg_1480-MG2525	0.380917	1.13891	NA	-0.229315	-0.219096	NA	4	1.30716	0.468395
1521	llmg_1481-vanZ-MG2526	0.338847	1.07186	-0.58844	-0.644804	0.294856	0.0602371	6	1.09282	0.749108
1522	llmg_1482-llmg_1482-MG2527	-1.83442	-0.203248	-0.316937	-0.413911	0.0686354	-0.265703	6	-1.63929	0.133489
1523	llmg_1483-comFA-MG2529	NA	NA	0.960252	0.0106637	0.998016	NA	3	1.92767	0.179234
1524	llmg_1483-comFA-MG2530	NA	NA	-4.44029	NA	NA	NA	1	-84.7996	NA
1525	llmg_1484-comFC-MG2531	0.702997	1.55481	-0.840834	NA	NA	NA	3	1.60372	0.56994
1526	llmg_1485-llmg_1485-MG2532	0.100538	-0.169759	-0.0785192	0.487212	0.0591857	-0.0402186	6	1.06156	0.553814
1527	llmg_1486-dgkA-MG2533	0.209954	0.0693963	0.280957	0.218173	0.12825	0.156536	6	1.19388	0.00213996
1528	llmg_1487-llmg_1487-MG2534	-1.31897	0.368708	0.273138	0.115434	0.212572	-0.0117523	6	-1.06199	0.824491
1529	llmg_1488-llmg_1488-mg8435	0.657555	NA	-0.00935377	0.245867	-0.171185	0.505326	5	1.27844	0.186497
1530	llmg_1489-phoH-MG512	0.107275	0.196904	0.197436	-0.0165937	0.173502	0.279153	6	1.16915	0.0127664
1531	llmg_1490-mntH-MG513	-1.13249	-1.07595	-0.361591	-0.354541	-0.435428	-0.419875	6	-1.87757	0.00865167
1532	llmg_1491-rpmA-mg8431	-0.617597	-0.526212	-0.342762	-0.279932	-0.436374	-0.371988	6	-1.53594	0.000388092
1533	llmg_1492-llmg_1492-MG150326	-0.152823	-0.233939	0.00212531	-0.0474835	-0.035001	-0.00662625	6	-1.08216	0.0948006
1534	llmg_1493-rplU-mg8428	-0.140116	-0.278835	-0.0955944	-0.16887	-0.0838089	-0.0703833	6	-1.14982	0.00696661
1535	llmg_1494-llmg_1494-MG520	-0.0264701	-0.3442	-0.40981	-0.335606	-0.0549213	-0.118115	6	-1.23968	0.0254359
1536	llmg_1495-llmg_1495-MG150014	-0.0525007	-0.0836241	-0.37766	-0.154288	-0.0158225	-0.140032	6	-1.1472	0.0475362
1537	llmg_1495-llmg_1495-MG150327	-0.159422	-0.357943	-0.0698212	-0.395929	0.0380689	-0.187028	6	-1.20765	0.0388153
1538	llmg_1496-llmg_1496-MG522	-0.577445	-0.308963	-0.0591673	-0.0955676	-0.0996795	0.146253	6	-1.18029	0.162777
1539	llmg_1496-llmg_1496-MG523	-0.137392	0.0157341	0.17198	0.174562	-0.0121551	0.0503626	6	1.04482	0.406632
1540	llmg_1497-llmg_1497-MG525	0.271196	0.310227	0.100124	-0.219308	0.138267	0.036458	6	1.112	0.229663
1541	llmg_1498-llmg_1498-mg8419	-0.392966	-0.533395	-0.249219	-0.419807	-0.510216	-0.490967	6	-1.54151	0.000162097
1542	llmg_1499-llmg_1499-MG527	-0.573139	-0.287146	-0.179758	-0.156161	-0.0230784	-0.167099	6	-1.25994	0.0294553
1543	llmg_1500-llmg_1500-MG528	-0.222732	-0.143387	-0.106692	-0.165988	-0.147344	-0.109899	6	-1.16107	0.000353491
1544	llmg_1501-nth-MG529	0.00172306	0.148859	-0.042624	-0.0325962	-0.108216	-0.161466	6	-1.03292	0.489187
1545	llmg_1502-dnaD-MG530	-0.41885	-0.667965	-0.317219	-0.108486	-0.0362634	-0.0825186	6	-1.31243	0.0415189
1546	llmg_1503-llmg_1503-MG150103	NA	NA	2.56777	NA	NA	NA	1	13.0368	NA
1547	llmg_1503-llmg_1503-mg6446	-0.333844	0.651418	0.0861431	-0.501487	0.672589	-0.487864	6	1.0146	0.950568
1548	llmg_1504-llmg_1504-MG150104	NA	-1.0124	NA	-2.57418	NA	NA	2	-6.00919	NA
1549	llmg_1505-llmg_1505-MG2754	NA	-0.606481	0.842935	NA	NA	0.560645	3	1.30434	0.610035
1550	llmg_1506-llmg_1506-MG2755	-0.106913	NA	-0.198909	0.149172	NA	0.186914	4	1.00759	0.941444
1551	llmg_1507-llmg_1507-MG16	1.10246	-3.1816	0.307686	-0.893301	-0.705025	0.271135	6	-1.67605	0.436571
1552	llmg_1508-pyrC-MG15	-0.117209	-0.20411	-0.562773	-0.605223	-0.564411	-0.593615	6	-1.55461	0.00439765
1553	llmg_1509-pyrE-MG1464	-0.105923	-0.0780115	-0.526927	-0.569406	-0.504668	-0.496458	6	-1.46262	0.00898449
1554	llmg_1512-llmg_1512-MG1467	0.918473	0.873897	0.128565	0.054078	-0.0991239	-0.338492	6	1.29205	0.282233
1555	llmg_1512-llmg_1512-mg7758	0.113261	0.264043	0.0207018	0.11201	0.350197	0.247023	6	1.20266	0.0140804
1556	llmg_1513-llmg_1513-MG150328	0.52657	-1.37406	0.168471	-0.181876	-0.0726059	-0.148523	6	-1.19762	0.52185
1557	llmg_1514-rex-MG150180	-0.640764	-0.727148	-0.295351	-0.204768	-0.557365	-0.213651	6	-1.55246	0.00539237
1558	llmg_1515-radC-mg12898s	NA	-1.4931	1.75565	-0.386103	-0.449654	1.36954	5	1.17265	0.806529
1559	llmg_1516-glmS-mg8503	-0.0616871	-0.0219419	0.121201	-0.0290197	-0.180054	-0.155443	6	-1.056	0.272355
1560	llmg_1517-llmg_1517-MG381	-0.132591	0.093528	0.0659721	0.115516	-0.0208001	0.275137	6	1.06836	0.290409
1561	llmg_1518-kinE-MG380	0.515974	0.424673	0.0377116	0.0865509	0.366837	-0.0551268	6	1.25789	0.0626477
1562	llmg_1519-llmg_1519-MG378	-0.487922	-0.256555	0.147157	0.133437	0.202737	0.109392	6	-1.02562	0.83376
1563	llmg_1520-llrE-mg8229	0.238405	0.275591	0.431128	0.393591	0.285066	0.534778	6	1.43299	0.000563907
1564	llmg_1521-llmg_1521-MG375	0.31668	0.0391508	-0.0953652	-0.167362	0.196424	0.239864	6	1.09224	0.316103
1565	llmg_1522-llmg_1522-mg8226	0.684812	0.117256	-0.00342337	-0.175221	0.000635526	-0.0458982	6	1.10116	0.471584
1566	llmg_1522-llmg_1522-mg8227	-2.11014	0.414131	-0.112521	-0.107057	-0.0520271	0.0664482	6	-1.37281	0.428053
1567	llmg_1522-llmg_1522-mg8234	1.02293	-0.419138	-0.0994059	-0.0977114	0.0378635	0.00367369	6	1.07756	0.725103
1568	llmg_1523-llmg_1523-MG620	0.1298	-0.780651	-0.420159	-0.357184	-0.417091	-0.0369913	6	-1.3685	0.0620909
1569	llmg_1524-rluD-MG621	-0.213245	-0.58946	-0.207315	-0.302559	-0.243152	-0.184802	6	-1.33655	0.00548911
1570	llmg_1525-lspA-MG622	-0.709959	-0.541212	-0.370543	-0.31953	-0.397137	-0.190818	6	-1.5243	0.00232804
1571	llmg_1526-llmg_1526-MG150329	0.534594	-1.16758	-0.310592	-0.0103828	-0.230357	-0.391559	6	-1.30037	0.298442
1572	llmg_1527-llmg_1527-MG624	NA	1.21007	NA	NA	0.0649841	-0.526835	3	1.28326	0.673081
1573	llmg_1528-llmg_1528-MG150330	0.603203	0.316754	0.737529	0.734321	NA	-1.01274	5	1.3176	0.451691
1574	llmg_1529-llmg_1529-MG626	NA	NA	0.970304	-0.218046	NA	NA	2	1.45663	NA
1575	llmg_1530-ribA-MG627	-0.423658	-0.626518	0.302592	-0.218488	0.0162445	-0.802203	6	-1.33911	0.142081
1576	llmg_1531-ribB-mg8215	1.44186	0.0664387	-1.94185	-0.210078	NA	NA	4	-1.17458	0.831779
1577	llmg_1532-ribD-MG1498	-2.06289	-0.336268	0.00677459	0.479917	0.199037	-0.026387	6	-1.33639	0.470111
1578	llmg_1533-llmg_1533-mg8212	-0.0837259	0.375549	0.157135	0.0462687	0.164045	0.193436	6	1.15271	0.0728179
1579	llmg_1533-llmg_1533-mg8213	0.746986	0.133282	0.301092	0.254725	0.173027	0.221588	6	1.35678	0.0207628
1580	llmg_1534-parC-mg8211	0.251404	0.272361	0.055399	0.373283	0.253148	0.362884	6	1.29876	0.00252244
1581	llmg_1536-elaA-mg8207	-1.32167	-0.544244	0.303867	0.0527964	0.671015	0.450769	6	-1.06671	0.839994
1582	llmg_1537-dnaQ-mg8206	0.717163	0.261387	0.186731	0.224214	0.167879	0.0521296	6	1.30768	0.0360856
1583	llmg_1538-llmg_1538-MG150105	-0.204432	-1.42479	-0.128135	0.801061	0.289417	0.0549233	6	-1.10738	0.75008
1584	llmg_1538-llmg_1538-mg8203	0.246092	-0.0207362	-0.0630184	-0.0900155	0.288714	0.219142	6	1.10153	0.227517
1585	llmg_1539-parE-mg8200	-0.45129	-0.203207	-0.453351	0.210325	-0.159751	-0.13944	6	-1.22073	0.103089
1586	llmg_1539-parE-mg8202	-0.100297	-0.751987	0.195417	-0.373616	0.068734	0.0113514	6	-1.17163	0.316335
1587	llmg_1540-llmg_1540-MG150181	0.867393	-0.797197	-0.745991	-0.612691	-0.130175	-0.310867	6	-1.3341	0.307818
1588	llmg_1540-llmg_1540-MG150181B	0.0970709	-0.214085	-0.300459	-0.2463	-0.579852	-0.213015	6	-1.27478	0.0404108
1589	llmg_1541-nrdH-MG150331	-0.186816	-0.329508	0.193377	0.203832	-0.271265	-0.177547	6	-1.09928	0.367254
1590	llmg_1542-nrdI-MG396	-0.104343	-0.584944	0.390359	0.393057	-0.449893	-0.573283	6	-1.16747	0.444968
1591	llmg_1543-nrdE-mg5642	0.122476	0.334423	0.188377	0.141532	-0.0685408	-0.0575709	6	1.11641	0.138965
1592	llmg_1543-nrdE-mg5643	0.138137	0.135706	0.200498	0.0859268	-0.131041	0.042242	6	1.08175	0.157225
1593	llmg_1543-nrdE-mg5644	0.091285	0.218945	0.315831	0.345848	0.0473705	-0.00314037	6	1.18454	0.0357446
1594	llmg_1544-nrdF-mg5641	NA	0.376331	-0.0145212	-0.183054	0.223799	-0.305318	5	1.01964	0.884677
1595	llmg_1545-ftsX-mg5640	-0.12855	0.0650137	-0.0108821	0.0829136	-0.0539453	-0.0150939	6	-1.01014	0.76358
1596	llmg_1546-ftsE-mg5639	0.262583	0.51633	-0.0111247	0.0425782	0.26568	0.132651	6	1.22317	0.0491251
1597	llmg_1547-prfB-mg5637	-0.451727	-0.387197	-0.310388	-0.29289	-0.318833	-0.302223	6	-1.4104	4.05793e-05
1598	llmg_1547-prfB-mg6601	-0.161577	-0.143505	-0.205015	-0.159523	-0.0952392	1.56772	6	1.14318	0.660809
1599	llmg_1548-llmg_1548-MG2176	0.174292	-0.0209335	0.0660847	0.15631	-0.203747	-0.23903	6	-1.01123	0.883513
1600	llmg_1549	0.164767	-0.421044	0.0848522	-0.0526939	-0.245459	-0.130981	6	-1.10527	0.306333
1601	llmg_1550-llmg_1550-mg12015s	-0.913363	0.449402	-0.528783	-0.697932	-0.359242	-0.19876	6	-1.45467	0.111182
1602	llmg_1551-fdhC-MG2171	-0.59964	-0.974517	-1.0232	-0.916796	-0.834308	-0.852406	6	-2.37931	3.07947e-05
1603	llmg_1552-llmg_1552-MG2170	-0.458069	-0.394963	-0.804473	-0.792972	-0.40488	-0.479312	6	-1.7433	0.000840645
1604	llmg_1553-llmg_1553-mg6592	-0.859733	-0.904986	-0.737086	-0.70656	-0.38504	-0.418809	6	-1.9517	0.000684946
1605	llmg_1554-llmg_1554-MG215	-0.765637	-0.737552	-0.94362	-0.932114	-0.567623	-0.6119	6	-2.13772	7.46236e-05
1606	llmg_1555-llmg_1555-MG214	0.751214	0.670651	0.52153	0.811089	-0.363819	-1.28038	6	1.20328	0.611747
1607	llmg_1556-llmg_1556-MG213	0.989563	1.0315	-0.310417	-0.608458	0.172766	-0.0482353	6	1.22685	0.492661
1608	llmg_1557-llmg_1557-MG211	-0.195989	-0.229861	-0.0337988	-0.0379981	0.321902	0.0375542	6	-1.0233	0.786944
1609	llmg_1558-clsA-MG210	0.708599	0.849755	-0.411866	-0.173338	-0.154125	0.0113796	6	1.14844	0.54044
1610	llmg_1559-flpA-MG209	0.933176	0.737379	0.258119	0.376967	0.606527	0.4471	6	1.75046	0.00270351
1611	llmg_1560-llmg_1560-MG208	1.55769	NA	NA	0.35275	-1.29228	NA	3	1.22882	0.826282
1612	llmg_1561-llmg_1561-MG206	-0.33904	0.159422	NA	-0.171995	-0.153187	-0.335482	5	-1.183	0.137723
1613	llmg_1561-llmg_1561-MG207	NA	NA	NA	NA	NA	NA	0	#VALUE!	NA
1614	llmg_1562-llmg_1562-MG204	NA	-1.43025	NA	NA	0.245741	1.49062	3	1.10742	0.915047
1615	llmg_1563-llmg_1563-mg5803	1.18676	1.11748	-4.37428	-0.260232	1.64557	0.236622	6	-1.07754	0.937459
1616	llmg_1563-llmg_1563-mg5804	-0.242431	NA	NA	0.185361	-0.372415	-0.671044	4	-1.3167	0.219494
1617	llmg_1566-llmg_1566-MG1298	-0.341736	0.157232	1.04379	-0.249941	-0.0861998	-0.294909	6	1.03877	0.866146
1618	llmg_1568-fruA-mg7802	0.407949	-0.418781	-0.34176	0.34345	0.19551	-0.415957	6	-1.03901	0.821725
1619	llmg_1569-fruC-mg7801	-0.704626	-1.17446	0.800316	0.391154	-0.29013	-0.207765	6	-1.21846	0.529005
1620	llmg_1570-fruR-MG726	-0.640522	-3.92575	0.811534	-1.78952	0.867358	-0.0614305	6	-2.20278	0.338235
1621	llmg_1571-hipO2-MG727	0.326994	-0.716571	-0.0549973	0.770378	0.0239424	-0.311107	6	1.00646	0.976643
1622	llmg_1572-mycA-mg7798	-0.0926849	0.457273	-0.3507	-0.176623	0.156206	0.171223	6	1.02783	0.82596
1623	llmg_1573-llmg_1573-MG1529	0.541368	0.725079	-0.274215	-0.0135739	0.707779	0.179321	6	1.36473	0.123469
1624	llmg_1574-dnaK-MG1527	0.112973	0.0456594	0.187097	0.198127	0.0604016	0.195141	6	1.14252	0.00544076
1625	llmg_1574-dnaK-MG1528	-0.0618877	-0.0427975	0.311861	0.254665	0.113478	0.0599938	6	1.11169	0.150715
1626	llmg_1575-grpE-MG1526	0.171402	0.359382	0.56167	1.69237	0.173996	0.187163	6	1.68933	0.0822962
1627	llmg_1576-hrcA-MG1525	-0.148923	0.0618576	-0.609858	-0.376706	0.343045	0.300473	6	-1.07432	0.662347
1628	llmg_1577-llmg_1577-mg7791	0.30981	0.424298	0.297862	0.373864	0.347142	0.331794	6	1.41547	8.77398e-06
[truncated: 1,127 more rows]

## Sheet: 4. COG & KEGG annotations
COG annotation	Process
[truncated: 24 more rows]
